# Supplementary material
Source: ML conference proceedings conference paper supplement (https://aclanthology.org/2024.findings-eacl.77)
Supplement: software [file efficiency_calculcation.xlsx]

## Sheet: Sheet1
model	dataset	Seed	adapters	calculcation	time	CO2 Emission
deberta	reuters	5	1	Sentence Sim	18.7044	0.378505
deberta	techcrunch	5	1	Sentence Sim	19.0228	0.384947
deberta	fastcompany	5	1	Sentence Sim	19.1179	0.386873
deberta	nme	5	1	Sentence Sim	19.2456	0.389455
deberta	fool	5	1	Sentence Sim	19.6937	0.398523
deberta	inquisitr	5	1	Sentence Sim	19.171	0.387946
deberta	mashable	5	1	Sentence Sim	19.7498	0.399659
deberta	tripadv	5	1	Sentence Sim	19.6789	0.398225
deberta	ncbi	5	1	Sentence Sim	19.4295	0.393177
deberta	yelp	5	1	Sentence Sim	19.3034	0.390626
deberta	reuters	5	1	Averaging	125.843	4.92885
deberta	techcrunch	5	1	Averaging	102.347	4.00861
deberta	fastcompany	5	1	Averaging	111.298	4.35917
deberta	nme	5	1	Averaging	42.9045	1.68042
deberta	fool	5	1	Averaging	224.887	8.80807
deberta	inquisitr	5	1	Averaging	107.58	4.21354
deberta	mashable	5	1	Averaging	97.2705	3.80976
deberta	tripadv	5	1	Averaging	52.3851	2.05175
deberta	ncbi	5	1	Averaging	204.848	8.02321
deberta	yelp	5	1	Averaging	110.106	4.3125
deberta	reuters	42	10	Sentence Sim	18.8849	0.382158
deberta	techcrunch	42	10	Sentence Sim	18.8251	0.380946
deberta	fastcompany	42	10	Sentence Sim	18.9495	0.383463
deberta	nme	42	10	Sentence Sim	18.8306	0.381057
deberta	fool	42	10	Sentence Sim	18.6643	0.377692
deberta	inquisitr	42	10	Sentence Sim	19.09	0.386307
deberta	mashable	42	10	Sentence Sim	19.156	0.387643
deberta	tripadv	42	10	Sentence Sim	19.1105	0.386723
deberta	ncbi	42	10	Sentence Sim	19.17	0.387925
deberta	yelp	42	10	Sentence Sim	19.0491	0.38548
deberta	reuters	42	10	Averaging	124.43	4.87351
deberta	techcrunch	42	10	Averaging	99.2171	3.886
deberta	fastcompany	42	10	Averaging	111.03	4.34869
deberta	nme	42	10	Averaging	40.076	1.56964
deberta	fool	42	10	Averaging	222.768	8.7251
deberta	inquisitr	42	10	Averaging	105.292	4.12392
deberta	mashable	42	10	Averaging	93.8749	3.67677
deberta	tripadv	42	10	Averaging	51.9055	2.03296
deberta	ncbi	42	10	Averaging	203.038	7.95231
deberta	yelp	42	10	Averaging	108.82	4.26211
deberta	reuters	42	10	Ensembling	2103.27	82.378
deberta	techcrunch	42	10	Ensembling	1585.1	62.0832
deberta	fastcompany	42	10	Ensembling	1803.21	70.6257
deberta	nme	42	10	Ensembling	350.522	13.7288
deberta	fool	42	10	Ensembling	4133.09	161.879
deberta	inquisitr	42	10	Ensembling	1679.23	65.7699
deberta	mashable	42	10	Ensembling	1445.89	56.6308
deberta	tripadv	42	10	Ensembling	551.699	21.6082
deberta	ncbi	42	10	Ensembling	3786.02	148.286
deberta	yelp	42	10	Ensembling	1773.32	69.4549
deberta	reuters	42	10	TF-IDF	39.6516	0.802394
deberta	techcrunch	42	10	TF-IDF	39.4113	0.797532
deberta	fastcompany	42	10	TF-IDF	44.0984	0.89238
deberta	nme	42	10	TF-IDF	35.2862	0.714056
deberta	fool	42	10	TF-IDF	47.7202	0.965672
deberta	inquisitr	42	10	TF-IDF	38.7216	0.783574
deberta	mashable	42	10	TF-IDF	40.8974	0.827605
deberta	tripadv	42	10	TF-IDF	36.9603	0.747932
deberta	ncbi	42	10	TF-IDF	38.8255	0.785678
deberta	yelp	42	10	TF-IDF	34.4168	0.696463
deberta	reuters	42	10	Entropy	3441.54	134.794
deberta	techcrunch	42	10	Entropy	1804.02	70.6573
deberta	fastcompany	42	10	Entropy	2045.65	80.1214
deberta	nme	42	10	Entropy	392.708	15.3811
deberta	fool	42	10	Entropy	4793.72	187.754
deberta	inquisitr	42	10	Entropy	1949.04	76.3374
deberta	mashable	42	10	Entropy	1660.58	65.0396
deberta	tripadv	42	10	Entropy	631.958	24.7517
deberta	ncbi	42	10	Entropy	4276.05	167.479
deberta	yelp	42	10	Entropy	2045.25	80.1057
deberta	reuters	42	10	Prior	323.749	12.6802
deberta	techcrunch	42	10	Prior	328.425	12.8633
deberta	fastcompany	42	10	Prior	348.241	13.6394
deberta	nme	42	10	Prior	339.381	13.2924
deberta	fool	42	10	Prior	348.729	13.6585
deberta	inquisitr	42	10	Prior	328.002	12.8467
deberta	mashable	42	10	Prior	325.608	12.753
deberta	tripadv	42	10	Prior	364.527	14.2773
deberta	ncbi	42	10	Prior	337.604	13.2228
deberta	yelp	42	10	Prior	331.701	12.9916
deberta	reuters	88	10	Sentence Sim	18.9045	0.382553
deberta	techcrunch	88	10	Sentence Sim	18.8603	0.38166
deberta	fastcompany	88	10	Sentence Sim	19.0337	0.385168
deberta	nme	88	10	Sentence Sim	18.8269	0.380983
deberta	fool	88	10	Sentence Sim	19.1941	0.388413
deberta	inquisitr	88	10	Sentence Sim	18.7941	0.380319
deberta	mashable	88	10	Sentence Sim	19.5174	0.394957
deberta	tripadv	88	10	Sentence Sim	19.1479	0.387479
deberta	ncbi	88	10	Sentence Sim	18.7831	0.380097
deberta	yelp	88	10	Sentence Sim	18.9904	0.384292
deberta	reuters	88	10	Averaging	124.342	4.87005
deberta	techcrunch	88	10	Averaging	99.3437	3.89096
deberta	fastcompany	88	10	Averaging	109.498	4.28867
deberta	nme	88	10	Averaging	40.8699	1.60074
deberta	fool	88	10	Averaging	223.143	8.73976
deberta	inquisitr	88	10	Averaging	105.293	4.12398
deberta	mashable	88	10	Averaging	92.7424	3.63241
deberta	tripadv	88	10	Averaging	50.5695	1.98064
deberta	ncbi	88	10	Averaging	200.762	7.86316
deberta	yelp	88	10	Averaging	111.009	4.34786
deberta	reuters	88	10	Ensembling	2185.35	85.593
deberta	techcrunch	88	10	Ensembling	1615.39	63.2693
deberta	fastcompany	88	10	Ensembling	1829.02	71.6367
deberta	nme	88	10	Ensembling	359.359	14.0749
deberta	fool	88	10	Ensembling	4276.15	167.483
deberta	inquisitr	88	10	Ensembling	1768.24	69.2561
deberta	mashable	88	10	Ensembling	1478.11	57.8928
deberta	tripadv	88	10	Ensembling	553.891	21.6941
deberta	ncbi	88	10	Ensembling	3856.85	151.06
deberta	yelp	88	10	Ensembling	1820.25	71.2932
deberta	reuters	88	10	TF-IDF	37.6539	0.761968
deberta	techcrunch	88	10	TF-IDF	36.9048	0.746811
deberta	fastcompany	88	10	TF-IDF	39.3656	0.796607
deberta	nme	88	10	TF-IDF	32.7674	0.663084
deberta	fool	88	10	TF-IDF	45.5698	0.922156
deberta	inquisitr	88	10	TF-IDF	35.5953	0.720311
deberta	mashable	88	10	TF-IDF	39.4564	0.798443
deberta	tripadv	88	10	TF-IDF	33.7571	0.683112
deberta	ncbi	88	10	TF-IDF	38.1447	0.7719
deberta	yelp	88	10	TF-IDF	33.0609	0.669025
deberta	reuters	88	10	Entropy	2399.76	93.9905
deberta	techcrunch	88	10	Entropy	1798.73	70.4504
deberta	fastcompany	88	10	Entropy	2042.19	79.9857
deberta	nme	88	10	Entropy	391.943	15.3511
deberta	fool	88	10	Entropy	4780.2	187.224
deberta	inquisitr	88	10	Entropy	1947.02	76.2583
deberta	mashable	88	10	Entropy	1657.03	64.9001
deberta	tripadv	88	10	Entropy	630.629	24.6996
deberta	ncbi	88	10	Entropy	4266.19	167.092
deberta	yelp	88	10	Entropy	2042.53	79.9992
deberta	reuters	88	10	Prior	328.953	12.884
deberta	techcrunch	88	10	Prior	331.123	12.969
deberta	fastcompany	88	10	Prior	332.868	13.0373
deberta	nme	88	10	Prior	318.038	12.4565
deberta	fool	88	10	Prior	382.073	14.9645
deberta	inquisitr	88	10	Prior	373.258	14.6193
deberta	mashable	88	10	Prior	351.29	13.7589
deberta	tripadv	88	10	Prior	374.545	14.6697
deberta	ncbi	88	10	Prior	337.1	13.2031
deberta	yelp	88	10	Prior	346.707	13.5794
deberta	reuters	10	10	Sentence Sim	19.1171	0.386855
deberta	techcrunch	10	10	Sentence Sim	18.9997	0.38448
deberta	fastcompany	10	10	Sentence Sim	19.0018	0.384523
deberta	nme	10	10	Sentence Sim	19.105	0.386611
deberta	fool	10	10	Sentence Sim	19.0625	0.385751
deberta	inquisitr	10	10	Sentence Sim	19.0822	0.386149
deberta	mashable	10	10	Sentence Sim	18.9428	0.383328
deberta	tripadv	10	10	Sentence Sim	20.1599	0.407958
deberta	ncbi	10	10	Sentence Sim	19.5587	0.395793
deberta	yelp	10	10	Sentence Sim	19.8115	0.400909
deberta	reuters	10	10	Averaging	126.549	4.9565
deberta	techcrunch	10	10	Averaging	100.682	3.94338
deberta	fastcompany	10	10	Averaging	112.05	4.38864
deberta	nme	10	10	Averaging	42.4194	1.66143
deberta	fool	10	10	Averaging	224.653	8.79892
deberta	inquisitr	10	10	Averaging	107.013	4.19135
deberta	mashable	10	10	Averaging	94.3037	3.69356
deberta	tripadv	10	10	Averaging	52.8591	2.07032
deberta	ncbi	10	10	Averaging	204.223	7.99874
deberta	yelp	10	10	Averaging	112.686	4.41352
deberta	reuters	10	10	Ensembling	2767.55	108.396
deberta	techcrunch	10	10	Ensembling	2008.76	78.6764
deberta	fastcompany	10	10	Ensembling	2352.67	92.1464
deberta	nme	10	10	Ensembling	451.984	17.7027
deberta	fool	10	10	Ensembling	5310.11	207.979
deberta	inquisitr	10	10	Ensembling	2138.66	83.764
deberta	mashable	10	10	Ensembling	1893.28	74.1536
deberta	tripadv	10	10	Ensembling	714.386	27.9801
deberta	ncbi	10	10	Ensembling	4733.35	185.389
deberta	yelp	10	10	Ensembling	2271.78	88.9779
deberta	reuters	10	10	TF-IDF	35.7585	0.723612
deberta	techcrunch	10	10	TF-IDF	36.3118	0.73481
deberta	fastcompany	10	10	TF-IDF	40.5564	0.820704
deberta	nme	10	10	TF-IDF	31.788	0.643266
deberta	fool	10	10	TF-IDF	43.3053	0.876331
deberta	inquisitr	10	10	TF-IDF	35.6498	0.721413
deberta	mashable	10	10	TF-IDF	36.3476	0.735534
deberta	tripadv	10	10	TF-IDF	33.5205	0.678325
deberta	ncbi	10	10	TF-IDF	37.4517	0.757876
deberta	yelp	10	10	TF-IDF	32.3715	0.655073
deberta	reuters	10	10	Entropy	2399.2	93.9685
deberta	techcrunch	10	10	Entropy	1796.51	70.3632
deberta	fastcompany	10	10	Entropy	2044.03	80.0579
deberta	nme	10	10	Entropy	390.917	15.3109
deberta	fool	10	10	Entropy	4782.3	187.307
deberta	inquisitr	10	10	Entropy	1943.28	76.1119
deberta	mashable	10	10	Entropy	1648.49	64.566
deberta	tripadv	10	10	Entropy	628.572	24.6191
deberta	ncbi	10	10	Entropy	4264.31	167.019
deberta	yelp	10	10	Entropy	2040.41	79.9162
deberta	reuters	10	10	Prior	362.761	14.2081
deberta	techcrunch	10	10	Prior	343.512	13.4542
deberta	fastcompany	10	10	Prior	352.177	13.7936
deberta	nme	10	10	Prior	342.7	13.4224
deberta	fool	10	10	Prior	343.633	13.4589
deberta	inquisitr	10	10	Prior	320.297	12.545
deberta	mashable	10	10	Prior	326.675	12.7948
deberta	tripadv	10	10	Prior	332.533	13.0242
deberta	ncbi	10	10	Prior	340.585	13.3396
deberta	yelp	10	10	Prior	348.508	13.6499
deberta	reuters	5	1	Ensembling	293.172	11.4826
deberta	techcrunch	5	1	Ensembling	235.301	9.21597
deberta	fastcompany	5	1	Ensembling	252.075	9.87295
deberta	nme	5	1	Ensembling	48.9367	1.91669
deberta	fool	5	1	Ensembling	585.466	22.9308
deberta	inquisitr	5	1	Ensembling	232.652	9.11221
deberta	mashable	5	1	Ensembling	199.626	7.81868
deberta	tripadv	5	1	Ensembling	77.0185	3.01656
deberta	ncbi	5	1	Ensembling	517.234	20.2583
deberta	yelp	5	1	Ensembling	243.795	9.54863
deberta	reuters	5	1	TF-IDF	37.0188	0.749116
deberta	techcrunch	5	1	TF-IDF	38.2026	0.773071
deberta	fastcompany	5	1	TF-IDF	43.1669	0.873531
deberta	nme	5	1	TF-IDF	34.4226	0.696581
deberta	fool	5	1	TF-IDF	44.2327	0.895097
deberta	inquisitr	5	1	TF-IDF	38.1019	0.771033
deberta	mashable	5	1	TF-IDF	37.9914	0.768798
deberta	tripadv	5	1	TF-IDF	34.4229	0.696585
deberta	ncbi	5	1	TF-IDF	37.0868	0.750493
deberta	yelp	5	1	TF-IDF	32.786	0.663461
deberta	reuters	5	1	Entropy	2394.99	93.8039
deberta	techcrunch	5	1	Entropy	1793.5	70.2455
deberta	fastcompany	5	1	Entropy	2039.04	79.8623
deberta	nme	5	1	Entropy	391.699	15.3415
deberta	fool	5	1	Entropy	4775.77	187.051
deberta	inquisitr	5	1	Entropy	1939.56	75.9661
deberta	mashable	5	1	Entropy	1652.47	64.7219
deberta	tripadv	5	1	Entropy	629.013	24.6363
deberta	ncbi	5	1	Entropy	4242.21	166.153
deberta	yelp	5	1	Entropy	2033.39	79.6411
deberta	reuters	5	1	Prior	373.699	14.6366
deberta	techcrunch	5	1	Prior	371.586	14.5538
deberta	fastcompany	5	1	Prior	370.524	14.5122
deberta	nme	5	1	Prior	375.897	14.7226
deberta	fool	5	1	Prior	340.737	13.3455
deberta	inquisitr	5	1	Prior	365.734	14.3246
deberta	mashable	5	1	Prior	342.631	13.4197
deberta	tripadv	5	1	Prior	314.551	12.3199
deberta	ncbi	5	1	Prior	318.158	12.4612
deberta	yelp	5	1	Prior	317.61	12.4397
deberta	reuters	5	21	Sentence Sim	18.9985	0.384456
deberta	techcrunch	5	21	Sentence Sim	18.8906	0.382272
deberta	fastcompany	5	21	Sentence Sim	18.7832	0.380099
deberta	nme	5	21	Sentence Sim	19.036	0.385214
deberta	fool	5	21	Sentence Sim	19.2625	0.389797
deberta	inquisitr	5	21	Sentence Sim	19.3262	0.391088
deberta	mashable	5	21	Sentence Sim	19.3844	0.392264
deberta	tripadv	5	21	Sentence Sim	18.8727	0.38191
deberta	ncbi	5	21	Sentence Sim	18.9617	0.383712
deberta	yelp	5	21	Sentence Sim	19.1738	0.388004
deberta	reuters	5	21	Averaging	122.62	4.80263
deberta	techcrunch	5	21	Averaging	98.3907	3.85364
deberta	fastcompany	5	21	Averaging	110.772	4.33858
deberta	nme	5	21	Averaging	41.4578	1.62376
deberta	fool	5	21	Averaging	226.644	8.87691
deberta	inquisitr	5	21	Averaging	106.115	4.15618
deberta	mashable	5	21	Averaging	96.7716	3.79022
deberta	tripadv	5	21	Averaging	51.4926	2.01679
deberta	ncbi	5	21	Averaging	202.235	7.92087
deberta	yelp	5	21	Averaging	109.604	4.29283
deberta	reuters	5	21	Ensembling	4318.08	169.125
deberta	techcrunch	5	21	Ensembling	3298.28	129.183
deberta	fastcompany	5	21	Ensembling	3796.99	148.716
deberta	nme	5	21	Ensembling	710.009	27.8087
deberta	fool	5	21	Ensembling	8356.62	327.301
deberta	inquisitr	5	21	Ensembling	3697.77	144.829
deberta	mashable	5	21	Ensembling	3074.38	120.413
deberta	tripadv	5	21	Ensembling	1114.84	43.6645
deberta	ncbi	5	21	Ensembling	7804.76	305.686
deberta	yelp	5	21	Ensembling	3974.94	155.685
deberta	reuters	5	21	TF-IDF	37.0899	0.750556
deberta	techcrunch	5	21	TF-IDF	37.377	0.756364
deberta	fastcompany	5	21	TF-IDF	41.4166	0.83811
deberta	nme	5	21	TF-IDF	34.0257	0.688547
deberta	fool	5	21	TF-IDF	44.0461	0.891323
deberta	inquisitr	5	21	TF-IDF	37.3926	0.75668
deberta	mashable	5	21	TF-IDF	38.0946	0.770887
deberta	tripadv	5	21	TF-IDF	34.2283	0.692648
deberta	ncbi	5	21	TF-IDF	36.829	0.745276
deberta	yelp	5	21	TF-IDF	32.7231	0.662188
deberta	reuters	5	21	Entropy	2405.35	94.2095
deberta	techcrunch	5	21	Entropy	1806.27	70.7457
deberta	fastcompany	5	21	Entropy	2051.38	80.3457
deberta	nme	5	21	Entropy	394.185	15.4389
deberta	fool	5	21	Entropy	4816.46	188.645
deberta	inquisitr	5	21	Entropy	1956.76	76.6397
deberta	mashable	5	21	Entropy	1669.02	65.3699
deberta	tripadv	5	21	Entropy	634.824	24.864
deberta	ncbi	5	21	Entropy	4275.53	167.458
deberta	yelp	5	21	Entropy	2047.35	80.188
deberta	reuters	5	21	Prior	332.881	13.0378
deberta	techcrunch	5	21	Prior	334.727	13.1102
deberta	fastcompany	5	21	Prior	332.636	13.0282
deberta	nme	5	21	Prior	344.449	13.4909
deberta	fool	5	21	Prior	356.548	13.9648
deberta	inquisitr	5	21	Prior	353.06	13.8282
deberta	mashable	5	21	Prior	333.755	13.0721
deberta	tripadv	5	21	Prior	330.933	12.9615
deberta	ncbi	5	21	Prior	349.623	13.6936
deberta	yelp	5	21	Prior	361.812	14.171
deberta	reuters	10	21	Sentence Sim	18.4622	0.373604
deberta	techcrunch	10	21	Sentence Sim	18.9304	0.383077
deberta	fastcompany	10	21	Sentence Sim	18.6456	0.377315
deberta	nme	10	21	Sentence Sim	19.2318	0.389177
deberta	fool	10	21	Sentence Sim	19.0405	0.385306
deberta	inquisitr	10	21	Sentence Sim	18.7254	0.378929
deberta	mashable	10	21	Sentence Sim	18.9968	0.384421
deberta	tripadv	10	21	Sentence Sim	19.4222	0.393029
deberta	ncbi	10	21	Sentence Sim	19.0029	0.384545
deberta	yelp	10	21	Sentence Sim	18.9545	0.383566
deberta	reuters	10	21	Averaging	138.153	5.41099
deberta	techcrunch	10	21	Averaging	114.273	4.47569
deberta	fastcompany	10	21	Averaging	124.866	4.89059
deberta	nme	10	21	Averaging	57.1888	2.23989
deberta	fool	10	21	Averaging	240.758	9.42969
deberta	inquisitr	10	21	Averaging	124.208	4.86481
deberta	mashable	10	21	Averaging	108.135	4.23529
deberta	tripadv	10	21	Averaging	69.8826	2.73707
deberta	ncbi	10	21	Averaging	221.017	8.65649
deberta	yelp	10	21	Averaging	184.732	7.23534
deberta	reuters	10	21	Ensembling	4840.74	189.595
deberta	techcrunch	10	21	Ensembling	3431.99	134.42
deberta	fastcompany	10	21	Ensembling	3963.75	155.247
deberta	nme	10	21	Ensembling	725.924	28.432
deberta	fool	10	21	Ensembling	9105.88	356.647
deberta	inquisitr	10	21	Ensembling	3745.6	146.703
deberta	mashable	10	21	Ensembling	3195.01	125.138
deberta	tripadv	10	21	Ensembling	1234.85	48.3651
deberta	ncbi	10	21	Ensembling	8358.72	327.383
deberta	yelp	10	21	Ensembling	4174.45	163.499
deberta	reuters	10	21	TF-IDF	35.7546	0.723534
deberta	techcrunch	10	21	TF-IDF	35.567	0.719737
deberta	fastcompany	10	21	TF-IDF	40.3465	0.816456
deberta	nme	10	21	TF-IDF	31.442	0.636264
deberta	fool	10	21	TF-IDF	42.2614	0.855206
deberta	inquisitr	10	21	TF-IDF	35.0187	0.708641
deberta	mashable	10	21	TF-IDF	35.2658	0.713643
deberta	tripadv	10	21	TF-IDF	32.6819	0.661354
deberta	ncbi	10	21	TF-IDF	36.6662	0.741981
deberta	yelp	10	21	TF-IDF	31.8623	0.64477
deberta	reuters	10	21	Entropy	2403.12	94.1223
deberta	techcrunch	10	21	Entropy	1802.02	70.5793
deberta	fastcompany	10	21	Entropy	2050.31	80.3037
deberta	nme	10	21	Entropy	393.171	15.3992
deberta	fool	10	21	Entropy	4807.38	188.289
deberta	inquisitr	10	21	Entropy	1952.93	76.4899
deberta	mashable	10	21	Entropy	1663.56	65.156
deberta	tripadv	10	21	Entropy	633.267	24.8029
deberta	ncbi	10	21	Entropy	4279.91	167.63
deberta	yelp	10	21	Entropy	2048.9	80.2486
deberta	reuters	10	21	Prior	457.14	17.9046
deberta	techcrunch	10	21	Prior	351.908	13.7831
deberta	fastcompany	10	21	Prior	336.924	13.1962
deberta	nme	10	21	Prior	362.393	14.1937
deberta	fool	10	21	Prior	348.347	13.6436
deberta	inquisitr	10	21	Prior	351.222	13.7562
deberta	mashable	10	21	Prior	347.369	13.6053
deberta	tripadv	10	21	Prior	377.23	14.7748
deberta	ncbi	10	21	Prior	366.252	14.3449
deberta	yelp	10	21	Prior	423.883	16.6021
deberta	reuters	42	21	Sentence Sim	19.3051	0.39066
deberta	techcrunch	42	21	Sentence Sim	19.0742	0.385987
deberta	fastcompany	42	21	Sentence Sim	19.2759	0.390069
deberta	nme	42	21	Sentence Sim	19.0962	0.386432
deberta	fool	42	21	Sentence Sim	19.5483	0.395581
deberta	inquisitr	42	21	Sentence Sim	19.0035	0.384557
deberta	mashable	42	21	Sentence Sim	18.9522	0.383518
deberta	tripadv	42	21	Sentence Sim	18.8646	0.381747
deberta	ncbi	42	21	Sentence Sim	18.9255	0.382979
deberta	yelp	42	21	Sentence Sim	18.854	0.381531
deberta	reuters	42	21	Averaging	139.899	5.47938
deberta	techcrunch	42	21	Averaging	190.163	7.44804
deberta	fastcompany	42	21	Averaging	125.87	4.9299
deberta	nme	42	21	Averaging	57.6043	2.25617
deberta	fool	42	21	Averaging	240.094	9.40368
deberta	inquisitr	42	21	Averaging	120.779	4.7305
deberta	mashable	42	21	Averaging	113.712	4.45373
deberta	tripadv	42	21	Averaging	68.87	2.69741
deberta	ncbi	42	21	Averaging	217.683	8.52593
deberta	yelp	42	21	Averaging	127.172	4.98091
deberta	reuters	42	21	Ensembling	4974.67	194.841
deberta	techcrunch	42	21	Ensembling	3957.54	155.004
deberta	fastcompany	42	21	Ensembling	4290.71	168.053
deberta	nme	42	21	Ensembling	797.604	31.2395
deberta	fool	42	21	Ensembling	9874.46	386.75
deberta	inquisitr	42	21	Ensembling	3964.12	155.261
deberta	mashable	42	21	Ensembling	3246.47	127.153
deberta	tripadv	42	21	Ensembling	1261.45	49.4068
deberta	ncbi	42	21	Ensembling	8517.23	333.591
deberta	yelp	42	21	Ensembling	3907.1	153.028
deberta	reuters	42	21	TF-IDF	37.5334	0.75953
deberta	techcrunch	42	21	TF-IDF	37.9266	0.767487
deberta	fastcompany	42	21	TF-IDF	39.8547	0.806505
deberta	nme	42	21	TF-IDF	34.248	0.693046
deberta	fool	42	21	TF-IDF	46.0505	0.931882
deberta	inquisitr	42	21	TF-IDF	35.5155	0.718695
deberta	mashable	42	21	TF-IDF	40.3928	0.817393
deberta	tripadv	42	21	TF-IDF	35.1142	0.710574
deberta	ncbi	42	21	TF-IDF	38.6024	0.781162
deberta	yelp	42	21	TF-IDF	33.9944	0.687914
deberta	reuters	42	21	Entropy	2413.81	94.5408
deberta	techcrunch	42	21	Entropy	1813.89	71.0442
deberta	fastcompany	42	21	Entropy	2053.52	80.4294
deberta	nme	42	21	Entropy	394.094	15.4353
deberta	fool	42	21	Entropy	4801.55	188.061
deberta	inquisitr	42	21	Entropy	1955.79	76.6018
deberta	mashable	42	21	Entropy	1671.6	65.4708
deberta	tripadv	42	21	Entropy	636.173	24.9168
deberta	ncbi	42	21	Entropy	4297.56	168.321
deberta	yelp	42	21	Entropy	2053.61	80.4331
deberta	reuters	42	21	Prior	416.731	16.322
deberta	techcrunch	42	21	Prior	632.723	24.7817
deberta	fastcompany	42	21	Prior	366.773	14.3653
deberta	nme	42	21	Prior	348.773	13.6603
deberta	fool	42	21	Prior	370.095	14.4954
deberta	inquisitr	42	21	Prior	363.364	14.2317
deberta	mashable	42	21	Prior	346.896	13.5867
deberta	tripadv	42	21	Prior	379.697	14.8715
deberta	ncbi	42	21	Prior	334.992	13.1205
deberta	yelp	42	21	Prior	355.291	13.9156
deberta	reuters	88	21	Sentence Sim	19.2536	0.389618
deberta	techcrunch	88	21	Sentence Sim	18.8649	0.381753
deberta	fastcompany	88	21	Sentence Sim	18.6913	0.37824
deberta	nme	88	21	Sentence Sim	18.8588	0.381629
deberta	fool	88	21	Sentence Sim	18.8885	0.382229
deberta	inquisitr	88	21	Sentence Sim	19.171	0.387946
deberta	mashable	88	21	Sentence Sim	19.2661	0.389872
deberta	tripadv	88	21	Sentence Sim	18.9344	0.383158
deberta	ncbi	88	21	Sentence Sim	19.0788	0.386081
deberta	yelp	88	21	Sentence Sim	19.0809	0.386124
deberta	reuters	88	21	Averaging	41.9725	1.64392
deberta	techcrunch	88	21	Averaging	16.8299	0.659173
deberta	fastcompany	88	21	Averaging	25.3639	0.993418
deberta	nme	88	21	Averaging	57.259	2.24265
deberta	fool	88	21	Averaging	240.995	9.43898
deberta	inquisitr	88	21	Averaging	25.5558	1.00094
deberta	mashable	88	21	Averaging	9.2633	0.362813
deberta	tripadv	88	21	Averaging	65.586	2.56878
deberta	ncbi	88	21	Averaging	217.963	8.53689
deberta	yelp	88	21	Averaging	27.8016	1.0889
deberta	reuters	88	21	Ensembling	4629.97	181.34
deberta	techcrunch	88	21	Ensembling	3608.46	141.331
deberta	fastcompany	88	21	Ensembling	4075.18	159.611
deberta	nme	88	21	Ensembling	746.64	29.2434
deberta	fool	88	21	Ensembling	9496.75	371.956
deberta	inquisitr	88	21	Ensembling	3825.89	149.847
deberta	mashable	88	21	Ensembling	3308.51	129.583
deberta	tripadv	88	21	Ensembling	1249.92	48.9551
deberta	ncbi	88	21	Ensembling	8447.47	330.859
deberta	yelp	88	21	Ensembling	4017.83	157.365
deberta	reuters	88	21	TF-IDF	37.5334	0.75953
deberta	techcrunch	88	21	TF-IDF	37.9266	0.767487
deberta	fastcompany	88	21	TF-IDF	39.8547	0.806505
deberta	nme	88	21	TF-IDF	34.248	0.693046
deberta	fool	88	21	TF-IDF	46.0505	0.931882
deberta	inquisitr	88	21	TF-IDF	35.5155	0.718695
deberta	mashable	88	21	TF-IDF	40.3928	0.817393
deberta	tripadv	88	21	TF-IDF	35.1142	0.710574
deberta	ncbi	88	21	TF-IDF	38.6024	0.781162
deberta	yelp	88	21	TF-IDF	33.9944	0.687914
deberta	reuters	88	21	Entropy	2412.47	94.4885
deberta	techcrunch	88	21	Entropy	1808.75	70.8427
deberta	fastcompany	88	21	Entropy	2052.89	80.4048
deberta	nme	88	21	Entropy	393.832	15.4251
deberta	fool	88	21	Entropy	4803.66	188.143
deberta	inquisitr	88	21	Entropy	1953.19	76.4998
deberta	mashable	88	21	Entropy	1665.33	65.2254
deberta	tripadv	88	21	Entropy	634.763	24.8616
deberta	ncbi	88	21	Entropy	4292.64	168.129
deberta	yelp	88	21	Entropy	2049.65	80.278
deberta	reuters	88	21	Prior	370.925	14.5279
deberta	techcrunch	88	21	Prior	364.013	14.2572
deberta	fastcompany	88	21	Prior	371.858	14.5644
deberta	nme	88	21	Prior	371.245	14.5404
deberta	fool	88	21	Prior	388.571	15.219
deberta	inquisitr	88	21	Prior	384.009	15.0403
deberta	mashable	88	21	Prior	366.394	14.3504
deberta	tripadv	88	21	Prior	365.617	14.32
deberta	ncbi	88	21	Prior	346.189	13.5591
deberta	yelp	88	21	Prior	349.193	13.6767
gpt2	reuters	5	1	Sentence Sim	18.7874	0.380183
gpt2	techcrunch	5	1	Sentence Sim	18.8782	0.382021
gpt2	fastcompany	5	1	Sentence Sim	18.6529	0.377463
gpt2	nme	5	1	Sentence Sim	20.2646	0.410076
gpt2	fool	5	1	Sentence Sim	18.8803	0.382064
gpt2	inquisitr	5	1	Sentence Sim	18.8813	0.382083
gpt2	mashable	5	1	Sentence Sim	19.2155	0.388847
gpt2	tripadv	5	1	Sentence Sim	18.8784	0.382026
gpt2	ncbi	5	1	Sentence Sim	19.2654	0.389857
gpt2	yelp	5	1	Sentence Sim	19.063	0.385762
gpt2	reuters	5	1	Averaging	97.2381	3.80849
gpt2	techcrunch	5	1	Averaging	74.0263	2.89936
gpt2	fastcompany	5	1	Averaging	83.5616	3.27283
gpt2	nme	5	1	Averaging	19.8996	0.779401
gpt2	fool	5	1	Averaging	191.841	7.51378
gpt2	inquisitr	5	1	Averaging	80.0477	3.1352
gpt2	mashable	5	1	Averaging	68.4171	2.67967
gpt2	tripadv	5	1	Averaging	28.2196	1.10527
gpt2	ncbi	5	1	Averaging	171.269	6.70803
gpt2	yelp	5	1	Averaging	84.2912	3.3014
gpt2	reuters	5	1	Ensembling	50.2718	1.96898
gpt2	techcrunch	5	1	Ensembling	37.627	1.47372
gpt2	fastcompany	5	1	Ensembling	41.4176	1.62219
gpt2	nme	5	1	Ensembling	8.11995	0.318031
gpt2	fool	5	1	Ensembling	101.344	3.96929
gpt2	inquisitr	5	1	Ensembling	41.0522	1.60788
gpt2	mashable	5	1	Ensembling	35.6159	1.39495
gpt2	tripadv	5	1	Ensembling	13.143	0.514767
gpt2	ncbi	5	1	Ensembling	87.9332	3.44405
gpt2	yelp	5	1	Ensembling	43.0574	1.68641
gpt2	reuters	5	1	TF-IDF	37.6703	0.7623
gpt2	techcrunch	5	1	TF-IDF	37.3409	0.755635
gpt2	fastcompany	5	1	TF-IDF	41.7801	0.845467
gpt2	nme	5	1	TF-IDF	33.9759	0.68754
gpt2	fool	5	1	TF-IDF	44.4353	0.899197
gpt2	inquisitr	5	1	TF-IDF	37.1884	0.752548
gpt2	mashable	5	1	TF-IDF	38.7425	0.783998
gpt2	tripadv	5	1	TF-IDF	35.1277	0.710848
gpt2	ncbi	5	1	TF-IDF	37.4831	0.758513
gpt2	yelp	5	1	TF-IDF	33.0727	0.669263
gpt2	reuters	5	1	Entropy	900.554	35.2717
gpt2	techcrunch	5	1	Entropy	677.022	26.5167
gpt2	fastcompany	5	1	Entropy	768.008	30.0803
gpt2	nme	5	1	Entropy	149.195	5.84347
gpt2	fool	5	1	Entropy	1798.7	70.4493
gpt2	inquisitr	5	1	Entropy	731.274	28.6416
gpt2	mashable	5	1	Entropy	623.075	24.4038
gpt2	tripadv	5	1	Entropy	238.784	9.35239
gpt2	ncbi	5	1	Entropy	1602.81	62.7766
gpt2	yelp	5	1	Entropy	766.449	30.0192
gpt2	reuters	5	1	Prior	396.463	15.5282
gpt2	techcrunch	5	1	Prior	386.248	15.128
gpt2	fastcompany	5	1	Prior	386.793	15.1494
gpt2	nme	5	1	Prior	392.079	15.3564
gpt2	fool	5	1	Prior	404.979	15.8617
gpt2	inquisitr	5	1	Prior	410.358	16.0723
gpt2	mashable	5	1	Prior	428.841	16.7963
gpt2	tripadv	5	1	Prior	430.924	16.8778
gpt2	ncbi	5	1	Prior	395.745	15.5
gpt2	yelp	5	1	Prior	405.02	15.8633
gpt2	reuters	10	1	Sentence Sim	19.0626	0.385754
gpt2	techcrunch	10	1	Sentence Sim	18.9908	0.384301
gpt2	fastcompany	10	1	Sentence Sim	19.0668	0.385837
gpt2	nme	10	1	Sentence Sim	19.336	0.391285
gpt2	fool	10	1	Sentence Sim	18.8422	0.381293
gpt2	inquisitr	10	1	Sentence Sim	19.2842	0.390237
gpt2	mashable	10	1	Sentence Sim	18.4766	0.373894
gpt2	tripadv	10	1	Sentence Sim	18.7911	0.380259
gpt2	ncbi	10	1	Sentence Sim	18.677	0.377949
gpt2	yelp	10	1	Sentence Sim	18.6779	0.377969
gpt2	reuters	10	1	Averaging	97.9031	3.83454
gpt2	techcrunch	10	1	Averaging	74.2138	2.90671
gpt2	fastcompany	10	1	Averaging	83.9196	3.28685
gpt2	nme	10	1	Averaging	19.3193	0.756672
gpt2	fool	10	1	Averaging	191.848	7.51406
gpt2	inquisitr	10	1	Averaging	79.9642	3.13193
gpt2	mashable	10	1	Averaging	68.6993	2.69072
gpt2	tripadv	10	1	Averaging	28.3627	1.11087
gpt2	ncbi	10	1	Averaging	171.431	6.71437
gpt2	yelp	10	1	Averaging	83.7252	3.27924
gpt2	reuters	10	1	Ensembling	50.2933	1.96982
gpt2	techcrunch	10	1	Ensembling	38.447	1.50584
gpt2	fastcompany	10	1	Ensembling	43.4537	1.70194
gpt2	nme	10	1	Ensembling	8.17746	0.320284
gpt2	fool	10	1	Ensembling	102.048	3.99687
gpt2	inquisitr	10	1	Ensembling	40.216	1.57512
gpt2	mashable	10	1	Ensembling	35.3486	1.38449
gpt2	tripadv	10	1	Ensembling	13.2164	0.517644
gpt2	ncbi	10	1	Ensembling	89.6965	3.51311
gpt2	yelp	10	1	Ensembling	42.1647	1.65145
gpt2	reuters	10	1	TF-IDF	36.3662	0.735911
gpt2	techcrunch	10	1	TF-IDF	35.9788	0.728072
gpt2	fastcompany	10	1	TF-IDF	41.5867	0.841553
gpt2	nme	10	1	TF-IDF	32.2101	0.651806
gpt2	fool	10	1	TF-IDF	44.8046	0.906671
gpt2	inquisitr	10	1	TF-IDF	35.967	0.727833
gpt2	mashable	10	1	TF-IDF	36.1433	0.7314
gpt2	tripadv	10	1	TF-IDF	34.339	0.694888
gpt2	ncbi	10	1	TF-IDF	38.6739	0.78261
gpt2	yelp	10	1	TF-IDF	32.3322	0.654278
gpt2	reuters	10	1	Entropy	903.961	35.4051
gpt2	techcrunch	10	1	Entropy	678.751	26.5844
gpt2	fastcompany	10	1	Entropy	769.155	30.1252
gpt2	nme	10	1	Entropy	150.485	5.89401
gpt2	fool	10	1	Entropy	1794.21	70.2731
gpt2	inquisitr	10	1	Entropy	730.096	28.5954
gpt2	mashable	10	1	Entropy	622.78	24.3922
gpt2	tripadv	10	1	Entropy	238.444	9.33907
gpt2	ncbi	10	1	Entropy	1597.04	62.5506
gpt2	yelp	10	1	Entropy	768.631	30.1047
gpt2	reuters	10	1	Prior	406.675	15.9281
gpt2	techcrunch	10	1	Prior	414.867	16.249
gpt2	fastcompany	10	1	Prior	412.25	16.1465
gpt2	nme	10	1	Prior	419.322	16.4234
gpt2	fool	10	1	Prior	423.291	16.5789
gpt2	inquisitr	10	1	Prior	406.224	15.9105
gpt2	mashable	10	1	Prior	411.354	16.1114
gpt2	tripadv	10	1	Prior	412.676	16.1632
gpt2	ncbi	10	1	Prior	437.808	17.1475
gpt2	yelp	10	1	Prior	452.231	17.7124
gpt2	reuters	42	1	Sentence Sim	18.9009	0.38248
gpt2	techcrunch	42	1	Sentence Sim	18.6908	0.37823
gpt2	fastcompany	42	1	Sentence Sim	19.1504	0.38753
gpt2	nme	42	1	Sentence Sim	19.0028	0.384544
gpt2	fool	42	1	Sentence Sim	19.2514	0.389574
gpt2	inquisitr	42	1	Sentence Sim	18.7517	0.379462
gpt2	mashable	42	1	Sentence Sim	19.1444	0.387408
gpt2	tripadv	42	1	Sentence Sim	19.3037	0.390632
gpt2	ncbi	42	1	Sentence Sim	19.4263	0.393112
gpt2	yelp	42	1	Sentence Sim	19.2513	0.389572
gpt2	reuters	42	1	Averaging	97.2926	3.81063
gpt2	techcrunch	42	1	Averaging	73.8516	2.89252
gpt2	fastcompany	42	1	Averaging	84.1699	3.29666
gpt2	nme	42	1	Averaging	18.9979	0.744084
gpt2	fool	42	1	Averaging	190.298	7.45335
gpt2	inquisitr	42	1	Averaging	79.7281	3.12268
gpt2	mashable	42	1	Averaging	68.5739	2.68581
gpt2	tripadv	42	1	Averaging	29.0836	1.13911
gpt2	ncbi	42	1	Averaging	171.534	6.71841
gpt2	yelp	42	1	Averaging	83.9451	3.28785
gpt2	reuters	42	1	Ensembling	48.8447	1.91308
gpt2	techcrunch	42	1	Ensembling	36.6788	1.43659
gpt2	fastcompany	42	1	Ensembling	41.3494	1.61952
gpt2	nme	42	1	Ensembling	7.84294	0.307182
gpt2	fool	42	1	Ensembling	96.6804	3.78665
gpt2	inquisitr	42	1	Ensembling	40.2937	1.57817
gpt2	mashable	42	1	Ensembling	34.6343	1.35651
gpt2	tripadv	42	1	Ensembling	13.1204	0.513881
gpt2	ncbi	42	1	Ensembling	87.6788	3.43409
gpt2	yelp	42	1	Ensembling	41.8135	1.63769
gpt2	reuters	42	1	TF-IDF	40.1867	0.813222
gpt2	techcrunch	42	1	TF-IDF	38.8548	0.78627
gpt2	fastcompany	42	1	TF-IDF	43.3652	0.877544
gpt2	nme	42	1	TF-IDF	35.6002	0.720409
gpt2	fool	42	1	TF-IDF	48.0142	0.97162
gpt2	inquisitr	42	1	TF-IDF	38.0939	0.770872
gpt2	mashable	42	1	TF-IDF	41.0518	0.83073
gpt2	tripadv	42	1	TF-IDF	36.9815	0.748362
gpt2	ncbi	42	1	TF-IDF	40.6509	0.822616
gpt2	yelp	42	1	TF-IDF	35.3357	0.715058
gpt2	reuters	42	1	Entropy	898.855	35.2052
gpt2	techcrunch	42	1	Entropy	674.633	26.4231
gpt2	fastcompany	42	1	Entropy	766.712	30.0296
gpt2	nme	42	1	Entropy	150.181	5.8821
gpt2	fool	42	1	Entropy	1792.97	70.2245
gpt2	inquisitr	42	1	Entropy	730.563	28.6137
gpt2	mashable	42	1	Entropy	624.02	24.4408
gpt2	tripadv	42	1	Entropy	239.812	9.39264
gpt2	ncbi	42	1	Entropy	1597.77	62.5793
gpt2	yelp	42	1	Entropy	766.065	30.0042
gpt2	reuters	42	1	Prior	425.242	16.6553
gpt2	techcrunch	42	1	Prior	397.552	15.5708
gpt2	fastcompany	42	1	Prior	405.193	15.8701
gpt2	nme	42	1	Prior	423.743	16.5966
gpt2	fool	42	1	Prior	417.025	16.3335
gpt2	inquisitr	42	1	Prior	419.733	16.4395
gpt2	mashable	42	1	Prior	430.993	16.8806
gpt2	tripadv	42	1	Prior	409.235	16.0284
gpt2	ncbi	42	1	Prior	402.848	15.7782
gpt2	yelp	42	1	Prior	423.416	16.5838
gpt2	reuters	88	1	Sentence Sim	18.7494	0.379415
gpt2	techcrunch	88	1	Sentence Sim	18.6494	0.377392
gpt2	fastcompany	88	1	Sentence Sim	18.6995	0.378406
gpt2	nme	88	1	Sentence Sim	18.6538	0.37748
gpt2	fool	88	1	Sentence Sim	18.9397	0.383265
gpt2	inquisitr	88	1	Sentence Sim	18.8779	0.382016
gpt2	mashable	88	1	Sentence Sim	19.092	0.386349
gpt2	tripadv	88	1	Sentence Sim	19.2548	0.389642
gpt2	ncbi	88	1	Sentence Sim	19.3474	0.391516
gpt2	yelp	88	1	Sentence Sim	18.9671	0.38382
gpt2	reuters	88	1	Averaging	97.7737	3.82947
gpt2	techcrunch	88	1	Averaging	74.268	2.90883
gpt2	fastcompany	88	1	Averaging	83.8134	3.28269
gpt2	nme	88	1	Averaging	19.0939	0.747843
gpt2	fool	88	1	Averaging	191.509	7.50078
gpt2	inquisitr	88	1	Averaging	80.4053	3.14921
gpt2	mashable	88	1	Averaging	69.0894	2.706
gpt2	tripadv	88	1	Averaging	28.477	1.11535
gpt2	ncbi	88	1	Averaging	171.612	6.72147
gpt2	yelp	88	1	Averaging	83.9583	3.28837
gpt2	reuters	88	1	Ensembling	50.5882	1.98137
gpt2	techcrunch	88	1	Ensembling	37.6939	1.47634
gpt2	fastcompany	88	1	Ensembling	45.5495	1.78402
gpt2	nme	88	1	Ensembling	8.31309	0.325596
gpt2	fool	88	1	Ensembling	99.7814	3.9081
gpt2	inquisitr	88	1	Ensembling	39.7266	1.55596
gpt2	mashable	88	1	Ensembling	34.1495	1.33752
gpt2	tripadv	88	1	Ensembling	12.9472	0.507099
gpt2	ncbi	88	1	Ensembling	87.0273	3.40857
gpt2	yelp	88	1	Ensembling	43.2306	1.6932
gpt2	reuters	88	1	TF-IDF	36.8035	0.744761
gpt2	techcrunch	88	1	TF-IDF	36.8318	0.745332
gpt2	fastcompany	88	1	TF-IDF	39.651	0.802381
gpt2	nme	88	1	TF-IDF	32.8831	0.665425
gpt2	fool	88	1	TF-IDF	45.0732	0.912106
gpt2	inquisitr	88	1	TF-IDF	35.4707	0.717788
gpt2	mashable	88	1	TF-IDF	39.3783	0.796863
gpt2	tripadv	88	1	TF-IDF	34.2037	0.692151
gpt2	ncbi	88	1	TF-IDF	37.9644	0.768251
gpt2	yelp	88	1	TF-IDF	32.6165	0.660032
gpt2	reuters	88	1	Entropy	899.074	35.2137
gpt2	techcrunch	88	1	Entropy	673.283	26.3702
gpt2	fastcompany	88	1	Entropy	765.132	29.9677
gpt2	nme	88	1	Entropy	149.366	5.85016
gpt2	fool	88	1	Entropy	1785.29	69.9237
gpt2	inquisitr	88	1	Entropy	729.989	28.5912
gpt2	mashable	88	1	Entropy	622.767	24.3917
gpt2	tripadv	88	1	Entropy	238.028	9.32277
gpt2	ncbi	88	1	Entropy	1597	62.5493
gpt2	yelp	88	1	Entropy	763.077	29.8872
gpt2	reuters	88	1	Prior	440.248	17.243
gpt2	techcrunch	88	1	Prior	428.241	16.7728
gpt2	fastcompany	88	1	Prior	433.09	16.9627
gpt2	nme	88	1	Prior	419.297	16.4225
gpt2	fool	88	1	Prior	415.75	16.2835
gpt2	inquisitr	88	1	Prior	448.404	17.5625
gpt2	mashable	88	1	Prior	423.355	16.5814
gpt2	tripadv	88	1	Prior	402.824	15.7773
gpt2	ncbi	88	1	Prior	398.059	15.5906
gpt2	yelp	88	1	Prior	426.381	16.6999
gpt2	reuters	5	10	Sentence Sim	18.683	0.378072
gpt2	techcrunch	5	10	Sentence Sim	19.0412	0.38532
gpt2	fastcompany	5	10	Sentence Sim	18.5127	0.374625
gpt2	nme	5	10	Sentence Sim	19.0105	0.384698
gpt2	fool	5	10	Sentence Sim	19.0299	0.385092
gpt2	inquisitr	5	10	Sentence Sim	18.7192	0.378803
gpt2	mashable	5	10	Sentence Sim	18.8315	0.381077
gpt2	tripadv	5	10	Sentence Sim	18.7588	0.379605
gpt2	ncbi	5	10	Sentence Sim	18.9668	0.383814
gpt2	yelp	5	10	Sentence Sim	18.6896	0.378205
gpt2	reuters	5	10	Averaging	98.5405	3.8595
gpt2	techcrunch	5	10	Averaging	77.7419	3.04489
gpt2	fastcompany	5	10	Averaging	84.8349	3.3227
gpt2	nme	5	10	Averaging	19.6137	0.768204
gpt2	fool	5	10	Averaging	192.461	7.53805
gpt2	inquisitr	5	10	Averaging	80.8673	3.1673
gpt2	mashable	5	10	Averaging	70.6846	2.76848
gpt2	tripadv	5	10	Averaging	30.2748	1.18576
gpt2	ncbi	5	10	Averaging	172.322	6.74926
gpt2	yelp	5	10	Averaging	84.8131	3.32185
gpt2	reuters	5	10	Ensembling	389.063	15.2383
gpt2	techcrunch	5	10	Ensembling	287.537	11.2619
gpt2	fastcompany	5	10	Ensembling	346.368	13.5661
gpt2	nme	5	10	Ensembling	62.4463	2.44581
gpt2	fool	5	10	Ensembling	820.622	32.141
gpt2	inquisitr	5	10	Ensembling	314.625	12.3228
gpt2	mashable	5	10	Ensembling	277.869	10.8832
gpt2	tripadv	5	10	Ensembling	100.753	3.94617
gpt2	ncbi	5	10	Ensembling	708.254	27.7399
gpt2	yelp	5	10	Ensembling	333.453	13.0602
gpt2	reuters	5	10	TF-IDF	37.0577	0.749903
gpt2	techcrunch	5	10	TF-IDF	37.6759	0.762413
gpt2	fastcompany	5	10	TF-IDF	41.2079	0.833888
gpt2	nme	5	10	TF-IDF	34.8076	0.704369
gpt2	fool	5	10	TF-IDF	44.1155	0.892725
gpt2	inquisitr	5	10	TF-IDF	37.7648	0.764214
gpt2	mashable	5	10	TF-IDF	40.1307	0.81209
gpt2	tripadv	5	10	TF-IDF	35.2458	0.713239
gpt2	ncbi	5	10	TF-IDF	37.0591	0.749932
gpt2	yelp	5	10	TF-IDF	33.229	0.672426
gpt2	reuters	5	10	Entropy	898.885	35.2063
gpt2	techcrunch	5	10	Entropy	674.253	26.4082
gpt2	fastcompany	5	10	Entropy	765.917	29.9984
gpt2	nme	5	10	Entropy	148.959	5.83422
gpt2	fool	5	10	Entropy	1788.87	70.0642
gpt2	inquisitr	5	10	Entropy	729.558	28.5744
gpt2	mashable	5	10	Entropy	622.245	24.3713
gpt2	tripadv	5	10	Entropy	238.116	9.32622
gpt2	ncbi	5	10	Entropy	1596.71	62.5379
gpt2	yelp	5	10	Entropy	764.911	29.959
gpt2	reuters	5	10	Prior	402.174	15.7518
gpt2	techcrunch	5	10	Prior	424.407	16.6226
gpt2	fastcompany	5	10	Prior	432.235	16.9292
gpt2	nme	5	10	Prior	431.652	16.9064
gpt2	fool	5	10	Prior	409.307	16.0312
gpt2	inquisitr	5	10	Prior	409.444	16.0365
gpt2	mashable	5	10	Prior	403.519	15.8045
gpt2	tripadv	5	10	Prior	400.868	15.7007
gpt2	ncbi	5	10	Prior	433.088	16.9626
gpt2	yelp	5	10	Prior	415.854	16.2876
gpt2	reuters	10	10	Sentence Sim	18.7823	0.38008
gpt2	techcrunch	10	10	Sentence Sim	18.8114	0.380669
gpt2	fastcompany	10	10	Sentence Sim	18.5197	0.374766
gpt2	nme	10	10	Sentence Sim	18.6825	0.378062
gpt2	fool	10	10	Sentence Sim	18.9821	0.384123
gpt2	inquisitr	10	10	Sentence Sim	18.9134	0.382733
gpt2	mashable	10	10	Sentence Sim	19.0693	0.385888
gpt2	tripadv	10	10	Sentence Sim	18.8623	0.381699
gpt2	ncbi	10	10	Sentence Sim	18.6701	0.37781
gpt2	yelp	10	10	Sentence Sim	18.6055	0.376502
gpt2	reuters	10	10	Averaging	97.991	3.83798
gpt2	techcrunch	10	10	Averaging	74.4021	2.91408
gpt2	fastcompany	10	10	Averaging	84.1475	3.29578
gpt2	nme	10	10	Averaging	19.4227	0.760722
gpt2	fool	10	10	Averaging	191.427	7.49755
gpt2	inquisitr	10	10	Averaging	80.3824	3.14831
gpt2	mashable	10	10	Averaging	69.1399	2.70798
gpt2	tripadv	10	10	Averaging	28.7893	1.12758
gpt2	ncbi	10	10	Averaging	172.464	6.75484
gpt2	yelp	10	10	Averaging	84.8089	3.32168
gpt2	reuters	10	10	Ensembling	387.812	15.1893
gpt2	techcrunch	10	10	Ensembling	292.929	11.4731
gpt2	fastcompany	10	10	Ensembling	334.42	13.0981
gpt2	nme	10	10	Ensembling	62.3291	2.44122
gpt2	fool	10	10	Ensembling	794.997	31.1374
gpt2	inquisitr	10	10	Ensembling	314.901	12.3336
gpt2	mashable	10	10	Ensembling	263.544	10.3221
gpt2	tripadv	10	10	Ensembling	100.143	3.92226
gpt2	ncbi	10	10	Ensembling	702.006	27.4952
gpt2	yelp	10	10	Ensembling	331.59	12.9873
gpt2	reuters	10	10	TF-IDF	35.4598	0.717569
gpt2	techcrunch	10	10	TF-IDF	34.8338	0.704901
gpt2	fastcompany	10	10	TF-IDF	39.6965	0.803303
gpt2	nme	10	10	TF-IDF	31.75	0.642496
gpt2	fool	10	10	TF-IDF	43.9911	0.890209
gpt2	inquisitr	10	10	TF-IDF	35.2706	0.713739
gpt2	mashable	10	10	TF-IDF	35.6837	0.722099
gpt2	tripadv	10	10	TF-IDF	33.2264	0.672374
gpt2	ncbi	10	10	TF-IDF	36.5756	0.740147
gpt2	yelp	10	10	TF-IDF	32.3323	0.65428
gpt2	reuters	10	10	Entropy	899.696	35.2381
gpt2	techcrunch	10	10	Entropy	674.89	26.4332
gpt2	fastcompany	10	10	Entropy	768.054	30.0821
gpt2	nme	10	10	Entropy	149.376	5.85055
gpt2	fool	10	10	Entropy	1792.19	70.194
gpt2	inquisitr	10	10	Entropy	728.185	28.5206
gpt2	mashable	10	10	Entropy	621.733	24.3512
gpt2	tripadv	10	10	Entropy	238.399	9.33728
gpt2	ncbi	10	10	Entropy	1594.06	62.4342
gpt2	yelp	10	10	Entropy	763.579	29.9068
gpt2	reuters	10	10	Prior	443.521	17.3712
gpt2	techcrunch	10	10	Prior	405.574	15.885
gpt2	fastcompany	10	10	Prior	409.816	16.0511
gpt2	nme	10	10	Prior	409.388	16.0343
gpt2	fool	10	10	Prior	370.081	14.4949
gpt2	inquisitr	10	10	Prior	365.927	14.3321
gpt2	mashable	10	10	Prior	370.916	14.5276
gpt2	tripadv	10	10	Prior	403.097	15.788
gpt2	ncbi	10	10	Prior	386.367	15.1327
gpt2	yelp	10	10	Prior	410.018	16.059
gpt2	reuters	42	10	Sentence Sim	19.0637	0.385776
gpt2	techcrunch	42	10	Sentence Sim	19.1609	0.387743
gpt2	fastcompany	42	10	Sentence Sim	19.0858	0.386222
gpt2	nme	42	10	Sentence Sim	19.2694	0.389937
gpt2	fool	42	10	Sentence Sim	19.0242	0.384976
gpt2	inquisitr	42	10	Sentence Sim	19.1263	0.387042
gpt2	mashable	42	10	Sentence Sim	19.0247	0.384985
gpt2	tripadv	42	10	Sentence Sim	19.0661	0.385824
gpt2	ncbi	42	10	Sentence Sim	19.1036	0.386583
gpt2	yelp	42	10	Sentence Sim	19.1428	0.387377
gpt2	reuters	42	10	Averaging	97.6553	3.82483
gpt2	techcrunch	42	10	Averaging	74.2016	2.90623
gpt2	fastcompany	42	10	Averaging	84.1509	3.29591
gpt2	nme	42	10	Averaging	19.0856	0.74752
gpt2	fool	42	10	Averaging	190.976	7.47988
gpt2	inquisitr	42	10	Averaging	79.7477	3.12345
gpt2	mashable	42	10	Averaging	68.5224	2.68379
gpt2	tripadv	42	10	Averaging	28.3423	1.11007
gpt2	ncbi	42	10	Averaging	170.697	6.68563
gpt2	yelp	42	10	Averaging	83.6874	3.27776
gpt2	reuters	42	10	Ensembling	386.99	15.1571
gpt2	techcrunch	42	10	Ensembling	297.149	11.6384
gpt2	fastcompany	42	10	Ensembling	337.14	13.2047
gpt2	nme	42	10	Ensembling	60.9937	2.38892
gpt2	fool	42	10	Ensembling	786.017	30.7856
gpt2	inquisitr	42	10	Ensembling	320.507	12.5532
gpt2	mashable	42	10	Ensembling	277.381	10.8641
gpt2	tripadv	42	10	Ensembling	101.754	3.98537
gpt2	ncbi	42	10	Ensembling	707.539	27.712
gpt2	yelp	42	10	Ensembling	333.549	13.064
gpt2	reuters	42	10	TF-IDF	40.1926	0.813343
gpt2	techcrunch	42	10	TF-IDF	39.57	0.800743
gpt2	fastcompany	42	10	TF-IDF	42.5676	0.861403
gpt2	nme	42	10	TF-IDF	34.3745	0.695607
gpt2	fool	42	10	TF-IDF	46.7419	0.945874
gpt2	inquisitr	42	10	TF-IDF	38.0176	0.769328
gpt2	mashable	42	10	TF-IDF	40.7129	0.82387
gpt2	tripadv	42	10	TF-IDF	36.9937	0.748609
gpt2	ncbi	42	10	TF-IDF	39.6074	0.8015
gpt2	yelp	42	10	TF-IDF	34.3022	0.694144
gpt2	reuters	42	10	Entropy	899.086	35.2142
gpt2	techcrunch	42	10	Entropy	672.688	26.347
gpt2	fastcompany	42	10	Entropy	764.026	29.9244
gpt2	nme	42	10	Entropy	149.366	5.85015
gpt2	fool	42	10	Entropy	1784.6	69.897
gpt2	inquisitr	42	10	Entropy	728.883	28.5479
gpt2	mashable	42	10	Entropy	622.252	24.3715
gpt2	tripadv	42	10	Entropy	237.974	9.32063
gpt2	ncbi	42	10	Entropy	1593.84	62.4253
gpt2	yelp	42	10	Entropy	764.118	29.928
gpt2	reuters	42	10	Prior	408.368	15.9944
gpt2	techcrunch	42	10	Prior	416.418	16.3097
gpt2	fastcompany	42	10	Prior	427.347	16.7378
gpt2	nme	42	10	Prior	427.459	16.7421
gpt2	fool	42	10	Prior	442.424	17.3283
gpt2	inquisitr	42	10	Prior	403.208	15.7923
gpt2	mashable	42	10	Prior	420.517	16.4702
gpt2	tripadv	42	10	Prior	441.252	17.2824
gpt2	ncbi	42	10	Prior	411.406	16.1134
gpt2	yelp	42	10	Prior	424.476	16.6253
gpt2	reuters	88	10	Sentence Sim	18.9731	0.383941
gpt2	techcrunch	88	10	Sentence Sim	18.9383	0.383237
gpt2	fastcompany	88	10	Sentence Sim	18.9162	0.38279
gpt2	nme	88	10	Sentence Sim	18.6574	0.377553
gpt2	fool	88	10	Sentence Sim	19.3486	0.391541
gpt2	inquisitr	88	10	Sentence Sim	18.9501	0.383475
gpt2	mashable	88	10	Sentence Sim	19.1388	0.387296
gpt2	tripadv	88	10	Sentence Sim	18.7647	0.379725
gpt2	ncbi	88	10	Sentence Sim	18.6243	0.376884
gpt2	yelp	88	10	Sentence Sim	19.2654	0.389856
gpt2	reuters	88	10	Averaging	97.5696	3.82148
gpt2	techcrunch	88	10	Averaging	74.1504	2.90422
gpt2	fastcompany	88	10	Averaging	83.8967	3.28595
gpt2	nme	88	10	Averaging	19.0984	0.748021
gpt2	fool	88	10	Averaging	191.419	7.49724
gpt2	inquisitr	88	10	Averaging	79.6665	3.12027
gpt2	mashable	88	10	Averaging	68.5141	2.68347
gpt2	tripadv	88	10	Averaging	28.3984	1.11227
gpt2	ncbi	88	10	Averaging	172.093	6.74032
gpt2	yelp	88	10	Averaging	83.8222	3.28304
gpt2	reuters	88	10	Ensembling	397.294	15.5607
gpt2	techcrunch	88	10	Ensembling	294.566	11.5372
gpt2	fastcompany	88	10	Ensembling	331.424	12.9808
gpt2	nme	88	10	Ensembling	61.4728	2.40769
gpt2	fool	88	10	Ensembling	798.214	31.2634
gpt2	inquisitr	88	10	Ensembling	319.409	12.5102
gpt2	mashable	88	10	Ensembling	269.273	10.5465
gpt2	tripadv	88	10	Ensembling	101.62	3.98012
gpt2	ncbi	88	10	Ensembling	707.539	27.712
gpt2	yelp	88	10	Ensembling	333.549	13.064
gpt2	reuters	88	10	TF-IDF	36.8524	0.745749
gpt2	techcrunch	88	10	TF-IDF	37.4183	0.757202
gpt2	fastcompany	88	10	TF-IDF	39.2813	0.794901
gpt2	nme	88	10	TF-IDF	33.2273	0.672392
gpt2	fool	88	10	TF-IDF	45.9722	0.930298
gpt2	inquisitr	88	10	TF-IDF	35.3968	0.716294
gpt2	mashable	88	10	TF-IDF	39.938	0.80819
gpt2	tripadv	88	10	TF-IDF	33.8055	0.684092
gpt2	ncbi	88	10	TF-IDF	38.1038	0.771072
gpt2	yelp	88	10	TF-IDF	33.4221	0.676333
gpt2	reuters	88	10	Entropy	899.197	35.2186
gpt2	techcrunch	88	10	Entropy	675.15	26.4434
gpt2	fastcompany	88	10	Entropy	767.683	30.0676
gpt2	nme	88	10	Entropy	149.478	5.85457
gpt2	fool	88	10	Entropy	1787.77	70.0209
gpt2	inquisitr	88	10	Entropy	730.156	28.5978
gpt2	mashable	88	10	Entropy	621.064	24.325
gpt2	tripadv	88	10	Entropy	239.109	9.36509
gpt2	ncbi	88	10	Entropy	1595.68	62.4976
gpt2	yelp	88	10	Entropy	764.457	29.9412
gpt2	reuters	88	10	Prior	429.173	16.8093
gpt2	techcrunch	88	10	Prior	414.247	16.2247
gpt2	fastcompany	88	10	Prior	417.506	16.3523
gpt2	nme	88	10	Prior	421.691	16.5162
gpt2	fool	88	10	Prior	417.707	16.3602
gpt2	inquisitr	88	10	Prior	412.402	16.1524
gpt2	mashable	88	10	Prior	414.588	16.238
gpt2	tripadv	88	10	Prior	411.401	16.1132
gpt2	ncbi	88	10	Prior	417.544	16.3538
gpt2	yelp	88	10	Prior	384.147	15.0458
deberta	reuters	10	1	Sentence Sim	18.0517	0.365297
deberta	techcrunch	10	1	Sentence Sim	18.1215	0.36671
deberta	fastcompany	10	1	Sentence Sim	18.4178	0.372706
deberta	nme	10	1	Sentence Sim	18.1887	0.36807
deberta	fool	10	1	Sentence Sim	18.3539	0.371411
deberta	inquisitr	10	1	Sentence Sim	18.0342	0.364942
deberta	mashable	10	1	Sentence Sim	18.67	0.377807
deberta	tripadv	10	1	Sentence Sim	18.9325	0.383121
deberta	ncbi	10	1	Sentence Sim	18.5768	0.375922
deberta	yelp	10	1	Sentence Sim	18.7821	0.380078
deberta	reuters	10	1	Averaging	123.136	4.82281
deberta	techcrunch	10	1	Averaging	98.3228	3.85098
deberta	fastcompany	10	1	Averaging	107.556	4.2126
deberta	nme	10	1	Averaging	40.4287	1.58346
deberta	fool	10	1	Averaging	221.084	8.65912
deberta	inquisitr	10	1	Averaging	104.379	4.08817
deberta	mashable	10	1	Averaging	91.8774	3.59853
deberta	tripadv	10	1	Averaging	49.9335	1.95573
deberta	ncbi	10	1	Averaging	199.208	7.8023
deberta	yelp	10	1	Averaging	108.065	4.23253
deberta	reuters	10	1	Ensembling	313.473	12.2777
deberta	techcrunch	10	1	Ensembling	237.912	9.31823
deberta	fastcompany	10	1	Ensembling	269.324	10.5485
deberta	nme	10	1	Ensembling	52.1125	2.04107
deberta	fool	10	1	Ensembling	632.88	24.7878
deberta	inquisitr	10	1	Ensembling	253.496	9.9286
deberta	mashable	10	1	Ensembling	212.185	8.31058
deberta	tripadv	10	1	Ensembling	79.5656	3.11632
deberta	ncbi	10	1	Ensembling	540.285	21.1611
deberta	yelp	10	1	Ensembling	257.699	10.0932
deberta	reuters	10	1	TF-IDF	35.9667	0.727826
deberta	techcrunch	10	1	TF-IDF	35.4428	0.717224
deberta	fastcompany	10	1	TF-IDF	39.9194	0.807813
deberta	nme	10	1	TF-IDF	31.6927	0.641336
deberta	fool	10	1	TF-IDF	42.5233	0.860506
deberta	inquisitr	10	1	TF-IDF	35.2942	0.714217
deberta	mashable	10	1	TF-IDF	35.0547	0.70937
deberta	tripadv	10	1	TF-IDF	32.8761	0.665284
deberta	ncbi	10	1	TF-IDF	36.8551	0.745805
deberta	yelp	10	1	TF-IDF	31.9502	0.646547
deberta	reuters	10	1	Entropy	2388.65	93.5553
deberta	techcrunch	10	1	Entropy	1791.58	70.1702
deberta	fastcompany	10	1	Entropy	2037.97	79.8205
deberta	nme	10	1	Entropy	391.527	15.3348
deberta	fool	10	1	Entropy	4771.22	186.873
deberta	inquisitr	10	1	Entropy	1937.3	75.8777
deberta	mashable	10	1	Entropy	1649.4	64.6016
deberta	tripadv	10	1	Entropy	627.058	24.5598
deberta	ncbi	10	1	Entropy	4248.14	166.385
deberta	yelp	10	1	Entropy	2034.93	79.7013
deberta	reuters	10	1	Prior	336.697	13.1873
deberta	techcrunch	10	1	Prior	332.9	13.0386
deberta	fastcompany	10	1	Prior	356.734	13.9721
deberta	nme	10	1	Prior	340.993	13.3556
deberta	fool	10	1	Prior	335.133	13.126
deberta	inquisitr	10	1	Prior	322.588	12.6347
deberta	mashable	10	1	Prior	327.92	12.8435
deberta	tripadv	10	1	Prior	381.731	14.9511
deberta	ncbi	10	1	Prior	336.921	13.1961
deberta	yelp	10	1	Prior	310.645	12.1669
deberta	reuters	42	1	Sentence Sim	18.5586	0.375554
deberta	techcrunch	42	1	Sentence Sim	18.6352	0.377104
deberta	fastcompany	42	1	Sentence Sim	18.8968	0.382399
deberta	nme	42	1	Sentence Sim	18.6637	0.377682
deberta	fool	42	1	Sentence Sim	18.9035	0.382533
deberta	inquisitr	42	1	Sentence Sim	19.6447	0.397532
deberta	mashable	42	1	Sentence Sim	18.7545	0.379519
deberta	tripadv	42	1	Sentence Sim	18.9698	0.383875
deberta	ncbi	42	1	Sentence Sim	18.9284	0.383038
deberta	yelp	42	1	Sentence Sim	18.8418	0.381284
deberta	reuters	42	1	Averaging	124.95	4.89389
deberta	techcrunch	42	1	Averaging	99.5801	3.90022
deberta	fastcompany	42	1	Averaging	109.043	4.27086
deberta	nme	42	1	Averaging	41.1193	1.6105
deberta	fool	42	1	Averaging	223.308	8.74624
deberta	inquisitr	42	1	Averaging	106.132	4.15685
deberta	mashable	42	1	Averaging	96.0904	3.76354
deberta	tripadv	42	1	Averaging	53.3491	2.08951
deberta	ncbi	42	1	Averaging	203.661	7.9767
deberta	yelp	42	1	Averaging	112.259	4.3968
deberta	reuters	42	1	Ensembling	301.498	11.8087
deberta	techcrunch	42	1	Ensembling	225.426	8.82919
deberta	fastcompany	42	1	Ensembling	259.704	10.1717
deberta	nme	42	1	Ensembling	49.5891	1.94224
deberta	fool	42	1	Ensembling	607.637	23.7991
deberta	inquisitr	42	1	Ensembling	255.439	10.0047
deberta	mashable	42	1	Ensembling	218.671	8.56463
deberta	tripadv	42	1	Ensembling	83.2629	3.26113
deberta	ncbi	42	1	Ensembling	558.868	21.889
deberta	yelp	42	1	Ensembling	267.844	10.4906
deberta	reuters	42	1	TF-IDF	39.476	0.798841
deberta	techcrunch	42	1	TF-IDF	38.6068	0.781251
deberta	fastcompany	42	1	TF-IDF	42.0757	0.851448
deberta	nme	42	1	TF-IDF	34.4837	0.697817
deberta	fool	42	1	TF-IDF	46.3931	0.938816
deberta	inquisitr	42	1	TF-IDF	37.6922	0.762744
deberta	mashable	42	1	TF-IDF	40.1928	0.813345
deberta	tripadv	42	1	TF-IDF	35.9894	0.728286
deberta	ncbi	42	1	TF-IDF	38.518	0.779455
deberta	yelp	42	1	TF-IDF	34.5033	0.698212
deberta	reuters	42	1	Entropy	2390.76	93.638
deberta	techcrunch	42	1	Entropy	1793.65	70.2514
deberta	fastcompany	42	1	Entropy	2042.61	80.0022
deberta	nme	42	1	Entropy	392.056	15.3555
deberta	fool	42	1	Entropy	4781.66	187.282
deberta	inquisitr	42	1	Entropy	1941.06	76.0247
deberta	mashable	42	1	Entropy	1654.64	64.8068
deberta	tripadv	42	1	Entropy	628.662	24.6226
deberta	ncbi	42	1	Entropy	4264.65	167.032
deberta	yelp	42	1	Entropy	2034.9	79.7002
deberta	reuters	42	1	Prior	339.79	13.3084
deberta	techcrunch	42	1	Prior	325.077	12.7322
deberta	fastcompany	42	1	Prior	321.301	12.5843
deberta	nme	42	1	Prior	317.813	12.4477
deberta	fool	42	1	Prior	318.156	12.4611
deberta	inquisitr	42	1	Prior	339.551	13.2991
deberta	mashable	42	1	Prior	337.147	13.2049
deberta	tripadv	42	1	Prior	341.092	13.3594
deberta	ncbi	42	1	Prior	336.666	13.1861
deberta	yelp	42	1	Prior	338.116	13.2429
deberta	reuters	88	1	Sentence Sim	18.2782	0.369879
deberta	techcrunch	88	1	Sentence Sim	18.3501	0.371335
deberta	fastcompany	88	1	Sentence Sim	18.7167	0.378753
deberta	nme	88	1	Sentence Sim	18.9275	0.383018
deberta	fool	88	1	Sentence Sim	18.5344	0.375063
deberta	inquisitr	88	1	Sentence Sim	18.8176	0.380794
deberta	mashable	88	1	Sentence Sim	18.7965	0.380368
deberta	tripadv	88	1	Sentence Sim	18.6874	0.37816
deberta	ncbi	88	1	Sentence Sim	18.9519	0.383514
deberta	yelp	88	1	Sentence Sim	18.754	0.379509
deberta	reuters	88	1	Averaging	122.539	4.79943
deberta	techcrunch	88	1	Averaging	97.6585	3.82496
deberta	fastcompany	88	1	Averaging	108.165	4.23646
deberta	nme	88	1	Averaging	40.1744	1.5735
deberta	fool	88	1	Averaging	221.688	8.68278
deberta	inquisitr	88	1	Averaging	105.144	4.11816
deberta	mashable	88	1	Averaging	95.0358	3.72223
deberta	tripadv	88	1	Averaging	50.4713	1.97679
deberta	ncbi	88	1	Averaging	199.63	7.81884
deberta	yelp	88	1	Averaging	107.82	4.22294
deberta	reuters	88	1	Ensembling	309.864	12.1363
deberta	techcrunch	88	1	Ensembling	236.099	9.24722
deberta	fastcompany	88	1	Ensembling	268.028	10.4978
deberta	nme	88	1	Ensembling	51.4186	2.01389
deberta	fool	88	1	Ensembling	598.343	23.4351
deberta	inquisitr	88	1	Ensembling	235.055	9.20633
deberta	mashable	88	1	Ensembling	205.293	8.04066
deberta	tripadv	88	1	Ensembling	79.2944	3.1057
deberta	ncbi	88	1	Ensembling	529.307	20.7312
deberta	yelp	88	1	Ensembling	258.046	10.1068
deberta	reuters	88	1	TF-IDF	36.7432	0.743539
deberta	techcrunch	88	1	TF-IDF	37.8937	0.766822
deberta	fastcompany	88	1	TF-IDF	39.3193	0.79567
deberta	nme	88	1	TF-IDF	33.0903	0.669618
deberta	fool	88	1	TF-IDF	46.4324	0.93961
deberta	inquisitr	88	1	TF-IDF	36.0658	0.729832
deberta	mashable	88	1	TF-IDF	40.3106	0.81573
deberta	tripadv	88	1	TF-IDF	33.4746	0.677395
deberta	ncbi	88	1	TF-IDF	37.7117	0.763137
deberta	yelp	88	1	TF-IDF	32.8488	0.664731
deberta	reuters	88	1	Entropy	2386.67	93.478
deberta	techcrunch	88	1	Entropy	1790.66	70.1341
deberta	fastcompany	88	1	Entropy	2035.25	79.7138
deberta	nme	88	1	Entropy	390.799	15.3063
deberta	fool	88	1	Entropy	4767.36	186.722
deberta	inquisitr	88	1	Entropy	1941.66	76.0482
deberta	mashable	88	1	Entropy	1651.16	64.6705
deberta	tripadv	88	1	Entropy	627.255	24.5675
deberta	ncbi	88	1	Entropy	4246.82	166.334
deberta	yelp	88	1	Entropy	2033.83	79.6582
deberta	reuters	88	1	Prior	361.213	14.1475
deberta	techcrunch	88	1	Prior	357.382	13.9975
deberta	fastcompany	88	1	Prior	360.268	14.1105
deberta	nme	88	1	Prior	328.734	12.8754
deberta	fool	88	1	Prior	337.92	13.2352
deberta	inquisitr	88	1	Prior	359.751	14.0902
deberta	mashable	88	1	Prior	343.694	13.4613
deberta	tripadv	88	1	Prior	336.289	13.1713
deberta	ncbi	88	1	Prior	343.658	13.4599
deberta	yelp	88	1	Prior	355.175	13.911
deberta	reuters	5	10	Sentence Sim	19.1612	0.387748
deberta	techcrunch	5	10	Sentence Sim	19.4202	0.39299
deberta	fastcompany	5	10	Sentence Sim	18.8752	0.38196
deberta	nme	5	10	Sentence Sim	19.055	0.385599
deberta	fool	5	10	Sentence Sim	19.0264	0.385021
deberta	inquisitr	5	10	Sentence Sim	18.5483	0.375345
deberta	mashable	5	10	Sentence Sim	18.8023	0.380486
deberta	tripadv	5	10	Sentence Sim	18.2218	0.368739
deberta	ncbi	5	10	Sentence Sim	18.5712	0.375809
deberta	yelp	5	10	Sentence Sim	19.2086	0.388707
deberta	reuters	5	10	Averaging	122.638	4.80331
deberta	techcrunch	5	10	Averaging	101.422	3.97236
deberta	fastcompany	5	10	Averaging	108.102	4.234
deberta	nme	5	10	Averaging	39.8342	1.56017
deberta	fool	5	10	Averaging	224.692	8.80045
deberta	inquisitr	5	10	Averaging	107.47	4.20923
deberta	mashable	5	10	Averaging	92.0529	3.6054
deberta	tripadv	5	10	Averaging	49.9596	1.95675
deberta	ncbi	5	10	Averaging	199.619	7.81842
deberta	yelp	5	10	Averaging	107.768	4.2209
deberta	reuters	5	10	Ensembling	2265.47	88.7307
deberta	techcrunch	5	10	Ensembling	1586.59	62.1416
deberta	fastcompany	5	10	Ensembling	1896.06	74.2622
deberta	nme	5	10	Ensembling	378.56	14.8269
deberta	fool	5	10	Ensembling	4286.48	167.887
deberta	inquisitr	5	10	Ensembling	1763.03	69.0519
deberta	mashable	5	10	Ensembling	1502.64	58.8535
deberta	tripadv	5	10	Ensembling	580.531	22.7375
deberta	ncbi	5	10	Ensembling	3932.18	154.01
deberta	yelp	5	10	Ensembling	1875.36	73.4514
deberta	reuters	5	10	TF-IDF	37.5674	0.760218
deberta	techcrunch	5	10	TF-IDF	37.3347	0.755509
deberta	fastcompany	5	10	TF-IDF	42.6864	0.863806
deberta	nme	5	10	TF-IDF	34.7147	0.702491
deberta	fool	5	10	TF-IDF	43.9259	0.88889
deberta	inquisitr	5	10	TF-IDF	36.5057	0.738734
deberta	mashable	5	10	TF-IDF	38.5577	0.780259
deberta	tripadv	5	10	TF-IDF	35.0504	0.709285
deberta	ncbi	5	10	TF-IDF	37.3767	0.756359
deberta	yelp	5	10	TF-IDF	32.7317	0.662362
deberta	reuters	5	10	Entropy	2391.62	93.6719
deberta	techcrunch	5	10	Entropy	1794.55	70.2864
deberta	fastcompany	5	10	Entropy	2042.12	79.9831
deberta	nme	5	10	Entropy	392.659	15.3791
deberta	fool	5	10	Entropy	4776.23	187.069
deberta	inquisitr	5	10	Entropy	1946.59	76.2413
deberta	mashable	5	10	Entropy	1657.38	64.9141
deberta	tripadv	5	10	Entropy	630.556	24.6968
deberta	ncbi	5	10	Entropy	4266.19	167.092
deberta	yelp	5	10	Entropy	2040.52	79.9204
deberta	reuters	5	10	Prior	326.299	12.78
deberta	techcrunch	5	10	Prior	359.737	14.0897
deberta	fastcompany	5	10	Prior	325.714	12.7571
deberta	nme	5	10	Prior	342.116	13.3995
deberta	fool	5	10	Prior	331.079	12.9672
deberta	inquisitr	5	10	Prior	358.411	14.0378
deberta	mashable	5	10	Prior	357.492	14.0018
deberta	tripadv	5	10	Prior	363.602	14.2411
deberta	ncbi	5	10	Prior	362.403	14.1941
deberta	yelp	5	10	Prior	334.987	13.1203
gpt2	reuters	5	21	Sentence Sim	18.5033	0.374435
gpt2	techcrunch	5	21	Sentence Sim	18.8633	0.381719
gpt2	fastcompany	5	21	Sentence Sim	18.6805	0.37802
gpt2	nme	5	21	Sentence Sim	18.9328	0.383125
gpt2	fool	5	21	Sentence Sim	18.8791	0.38204
gpt2	inquisitr	5	21	Sentence Sim	18.7324	0.379071
gpt2	mashable	5	21	Sentence Sim	19.0063	0.384613
gpt2	tripadv	5	21	Sentence Sim	19.1062	0.386636
gpt2	ncbi	5	21	Sentence Sim	18.7418	0.379261
gpt2	yelp	5	21	Sentence Sim	18.8303	0.381052
gpt2	reuters	5	21	Averaging	97.6928	3.8263
gpt2	techcrunch	5	21	Averaging	74.5582	2.9202
gpt2	fastcompany	5	21	Averaging	84.5577	3.31184
gpt2	nme	5	21	Averaging	19.5977	0.767578
gpt2	fool	5	21	Averaging	192.543	7.54127
gpt2	inquisitr	5	21	Averaging	80.7804	3.1639
gpt2	mashable	5	21	Averaging	69.0845	2.70581
gpt2	tripadv	5	21	Averaging	28.4584	1.11462
gpt2	ncbi	5	21	Averaging	171.919	6.7335
gpt2	yelp	5	21	Averaging	84.441	3.30727
gpt2	reuters	5	21	Ensembling	793.212	31.0675
gpt2	techcrunch	5	21	Ensembling	592.415	23.2029
gpt2	fastcompany	5	21	Ensembling	683.113	26.7553
gpt2	nme	5	21	Ensembling	129.408	5.06846
gpt2	fool	5	21	Ensembling	1577.86	61.7994
gpt2	inquisitr	5	21	Ensembling	649.119	25.4238
gpt2	mashable	5	21	Ensembling	552.798	21.6513
gpt2	tripadv	5	21	Ensembling	209.156	8.19193
gpt2	ncbi	5	21	Ensembling	1429.88	56.0035
gpt2	yelp	5	21	Ensembling	678.525	26.5755
gpt2	reuters	5	21	TF-IDF	36.2846	0.734259
gpt2	techcrunch	5	21	TF-IDF	36.841	0.74552
gpt2	fastcompany	5	21	TF-IDF	40.3396	0.816316
gpt2	nme	5	21	TF-IDF	33.1227	0.670275
gpt2	fool	5	21	TF-IDF	43.272	0.875657
gpt2	inquisitr	5	21	TF-IDF	36.2822	0.73421
gpt2	mashable	5	21	TF-IDF	37.7275	0.763457
gpt2	tripadv	5	21	TF-IDF	34.6897	0.701984
gpt2	ncbi	5	21	TF-IDF	36.8302	0.7453
gpt2	yelp	5	21	TF-IDF	32.4662	0.656989
gpt2	reuters	5	21	Entropy	896.078	35.0964
gpt2	techcrunch	5	21	Entropy	675.874	26.4717
gpt2	fastcompany	5	21	Entropy	764.485	29.9423
gpt2	nme	5	21	Entropy	148.647	5.82201
gpt2	fool	5	21	Entropy	1788.67	70.0561
gpt2	inquisitr	5	21	Entropy	729.389	28.5677
gpt2	mashable	5	21	Entropy	621.728	24.351
gpt2	tripadv	5	21	Entropy	238.369	9.3361
gpt2	ncbi	5	21	Entropy	1600.97	62.7045
gpt2	yelp	5	21	Entropy	765.239	29.9719
gpt2	reuters	5	21	Prior	456.756	17.8896
gpt2	techcrunch	5	21	Prior	404.996	15.8623
gpt2	fastcompany	5	21	Prior	397.157	15.5553
gpt2	nme	5	21	Prior	402.605	15.7687
gpt2	fool	5	21	Prior	412.118	16.1413
gpt2	inquisitr	5	21	Prior	395.962	15.5085
gpt2	mashable	5	21	Prior	399.51	15.6475
gpt2	tripadv	5	21	Prior	408.06	15.9824
gpt2	ncbi	5	21	Prior	399.607	15.6513
gpt2	yelp	5	21	Prior	405.552	15.8841
gpt2	reuters	10	21	Sentence Sim	18.7037	0.37849
gpt2	techcrunch	10	21	Sentence Sim	18.8442	0.381332
gpt2	fastcompany	10	21	Sentence Sim	18.6904	0.37822
gpt2	nme	10	21	Sentence Sim	18.5032	0.374432
gpt2	fool	10	21	Sentence Sim	18.6354	0.377108
gpt2	inquisitr	10	21	Sentence Sim	18.7837	0.380109
gpt2	mashable	10	21	Sentence Sim	18.5836	0.376061
gpt2	tripadv	10	21	Sentence Sim	18.6768	0.377946
gpt2	ncbi	10	21	Sentence Sim	18.9628	0.383734
gpt2	yelp	10	21	Sentence Sim	18.2822	0.36996
gpt2	reuters	10	21	Averaging	97.5709	3.82153
gpt2	techcrunch	10	21	Averaging	74.3087	2.91043
gpt2	fastcompany	10	21	Averaging	84.2492	3.29976
gpt2	nme	10	21	Averaging	19.4565	0.762046
gpt2	fool	10	21	Averaging	191.129	7.48589
gpt2	inquisitr	10	21	Averaging	80.2502	3.14313
gpt2	mashable	10	21	Averaging	69.1141	2.70697
gpt2	tripadv	10	21	Averaging	28.7157	1.1247
gpt2	ncbi	10	21	Averaging	172.577	6.75926
gpt2	yelp	10	21	Averaging	84.5208	3.3104
gpt2	reuters	10	21	Ensembling	809.783	31.7165
gpt2	techcrunch	10	21	Ensembling	592.43	23.2035
gpt2	fastcompany	10	21	Ensembling	667.234	26.1333
gpt2	nme	10	21	Ensembling	127.78	5.0047
gpt2	fool	10	21	Ensembling	1557.2	60.9904
gpt2	inquisitr	10	21	Ensembling	637.829	24.9817
gpt2	mashable	10	21	Ensembling	540.505	21.1698
gpt2	tripadv	10	21	Ensembling	206.186	8.07561
gpt2	ncbi	10	21	Ensembling	1389.53	54.4232
gpt2	yelp	10	21	Ensembling	683.679	26.7774
gpt2	reuters	10	21	TF-IDF	35.8059	0.724572
gpt2	techcrunch	10	21	TF-IDF	34.8063	0.704344
gpt2	fastcompany	10	21	TF-IDF	39.3234	0.795753
gpt2	nme	10	21	TF-IDF	31.0127	0.627577
gpt2	fool	10	21	TF-IDF	43.2052	0.874306
gpt2	inquisitr	10	21	TF-IDF	34.4635	0.697406
gpt2	mashable	10	21	TF-IDF	35.2777	0.713884
gpt2	tripadv	10	21	TF-IDF	32.6018	0.659733
gpt2	ncbi	10	21	TF-IDF	36.8068	0.744827
gpt2	yelp	10	21	TF-IDF	31.4841	0.637116
gpt2	reuters	10	21	Entropy	897.534	35.1534
gpt2	techcrunch	10	21	Entropy	674.209	26.4065
gpt2	fastcompany	10	21	Entropy	766.062	30.0041
gpt2	nme	10	21	Entropy	149.151	5.84173
gpt2	fool	10	21	Entropy	1788.24	70.0394
gpt2	inquisitr	10	21	Entropy	729.194	28.5601
gpt2	mashable	10	21	Entropy	621.252	24.3324
gpt2	tripadv	10	21	Entropy	238.459	9.33964
gpt2	ncbi	10	21	Entropy	1596.68	62.5366
gpt2	yelp	10	21	Entropy	766.305	30.0136
gpt2	reuters	10	21	Prior	412.164	16.1431
gpt2	techcrunch	10	21	Prior	395.516	15.491
gpt2	fastcompany	10	21	Prior	374.666	14.6744
gpt2	nme	10	21	Prior	380.576	14.9059
gpt2	fool	10	21	Prior	382.402	14.9774
gpt2	inquisitr	10	21	Prior	367.793	14.4052
gpt2	mashable	10	21	Prior	394.588	15.4547
gpt2	tripadv	10	21	Prior	395.387	15.486
gpt2	ncbi	10	21	Prior	398.375	15.603
gpt2	yelp	10	21	Prior	398.345	15.6018
gpt2	reuters	42	21	Sentence Sim	18.7668	0.379768
gpt2	techcrunch	42	21	Sentence Sim	18.962	0.383716
gpt2	fastcompany	42	21	Sentence Sim	19.0399	0.385294
gpt2	nme	42	21	Sentence Sim	18.811	0.380662
gpt2	fool	42	21	Sentence Sim	19.07	0.385903
gpt2	inquisitr	42	21	Sentence Sim	19.4428	0.393447
gpt2	mashable	42	21	Sentence Sim	19.2517	0.389579
gpt2	tripadv	42	21	Sentence Sim	18.5146	0.374663
gpt2	ncbi	42	21	Sentence Sim	18.9924	0.384333
gpt2	yelp	42	21	Sentence Sim	19.0604	0.385709
gpt2	reuters	42	21	Averaging	98.2146	3.84674
gpt2	techcrunch	42	21	Averaging	74.1128	2.90275
gpt2	fastcompany	42	21	Averaging	83.5951	3.27414
gpt2	nme	42	21	Averaging	18.8795	0.739448
gpt2	fool	42	21	Averaging	191.1	7.48476
gpt2	inquisitr	42	21	Averaging	80.0184	3.13406
gpt2	mashable	42	21	Averaging	68.7887	2.69422
gpt2	tripadv	42	21	Averaging	28.3428	1.11009
gpt2	ncbi	42	21	Averaging	171.476	6.71614
gpt2	yelp	42	21	Averaging	83.9872	3.2895
gpt2	reuters	42	21	Ensembling	795.342	31.1509
gpt2	techcrunch	42	21	Ensembling	595.882	23.3387
gpt2	fastcompany	42	21	Ensembling	727.904	28.5096
gpt2	nme	42	21	Ensembling	137.73	5.39441
gpt2	fool	42	21	Ensembling	1790.12	70.1129
gpt2	inquisitr	42	21	Ensembling	649.655	25.4448
gpt2	mashable	42	21	Ensembling	563.542	22.0721
gpt2	tripadv	42	21	Ensembling	207.831	8.14004
gpt2	ncbi	42	21	Ensembling	1483.15	58.0902
gpt2	yelp	42	21	Ensembling	677.318	26.5283
gpt2	reuters	42	21	TF-IDF	39.8814	0.807045
gpt2	techcrunch	42	21	TF-IDF	39.0503	0.790226
gpt2	fastcompany	42	21	TF-IDF	42.814	0.86639
gpt2	nme	42	21	TF-IDF	34.3317	0.694739
gpt2	fool	42	21	TF-IDF	46.3958	0.93887
gpt2	inquisitr	42	21	TF-IDF	37.3892	0.756611
gpt2	mashable	42	21	TF-IDF	40.6237	0.822066
gpt2	tripadv	42	21	TF-IDF	36.7335	0.743342
gpt2	ncbi	42	21	TF-IDF	38.6948	0.783031
gpt2	yelp	42	21	TF-IDF	34.8862	0.705961
gpt2	reuters	42	21	Entropy	901	35.2892
gpt2	techcrunch	42	21	Entropy	675.897	26.4726
gpt2	fastcompany	42	21	Entropy	766.608	30.0255
gpt2	nme	42	21	Entropy	149.678	5.8624
gpt2	fool	42	21	Entropy	1790.25	70.1183
gpt2	inquisitr	42	21	Entropy	731.454	28.6486
gpt2	mashable	42	21	Entropy	624.141	24.4455
gpt2	tripadv	42	21	Entropy	238.581	9.34444
gpt2	ncbi	42	21	Entropy	1599.3	62.6392
gpt2	yelp	42	21	Entropy	765.924	29.9987
gpt2	reuters	42	21	Prior	410.999	16.0975
gpt2	techcrunch	42	21	Prior	434.398	17.0139
gpt2	fastcompany	42	21	Prior	443.817	17.3828
gpt2	nme	42	21	Prior	454.21	17.7899
gpt2	fool	42	21	Prior	447.195	17.5151
gpt2	inquisitr	42	21	Prior	452.246	17.713
gpt2	mashable	42	21	Prior	423.622	16.5919
gpt2	tripadv	42	21	Prior	432.052	16.922
gpt2	ncbi	42	21	Prior	435.534	17.0584
gpt2	yelp	42	21	Prior	429.896	16.8376
gpt2	reuters	88	21	Sentence Sim	18.9399	0.38327
gpt2	techcrunch	88	21	Sentence Sim	18.8249	0.380943
gpt2	fastcompany	88	21	Sentence Sim	18.6066	0.376525
gpt2	nme	88	21	Sentence Sim	18.7803	0.38004
gpt2	fool	88	21	Sentence Sim	19.1758	0.388044
gpt2	inquisitr	88	21	Sentence Sim	18.5344	0.375064
gpt2	mashable	88	21	Sentence Sim	18.6299	0.376996
gpt2	tripadv	88	21	Sentence Sim	18.5429	0.375236
gpt2	ncbi	88	21	Sentence Sim	18.7845	0.380125
gpt2	yelp	88	21	Sentence Sim	18.9275	0.38302
gpt2	reuters	88	21	Averaging	98.4544	3.85613
gpt2	techcrunch	88	21	Averaging	74.3924	2.9137
gpt2	fastcompany	88	21	Averaging	84.0393	3.29154
gpt2	nme	88	21	Averaging	19.3536	0.758015
gpt2	fool	88	21	Averaging	191.343	7.49426
gpt2	inquisitr	88	21	Averaging	80.1283	3.13836
gpt2	mashable	88	21	Averaging	68.6537	2.68894
gpt2	tripadv	88	21	Averaging	28.5294	1.1174
gpt2	ncbi	88	21	Averaging	170.656	6.68404
gpt2	yelp	88	21	Averaging	83.7735	3.28113
gpt2	reuters	88	21	Ensembling	874.936	34.2683
gpt2	techcrunch	88	21	Ensembling	634.437	24.8488
gpt2	fastcompany	88	21	Ensembling	683.955	26.7882
gpt2	nme	88	21	Ensembling	126.73	4.96361
gpt2	fool	88	21	Ensembling	1577.34	61.7792
gpt2	inquisitr	88	21	Ensembling	653.796	25.607
gpt2	mashable	88	21	Ensembling	555.506	21.7573
gpt2	tripadv	88	21	Ensembling	213.696	8.36978
gpt2	ncbi	88	21	Ensembling	1417.42	55.5157
gpt2	yelp	88	21	Ensembling	672.673	26.3464
gpt2	reuters	88	21	TF-IDF	36.7871	0.744429
gpt2	techcrunch	88	21	TF-IDF	36.4987	0.738592
gpt2	fastcompany	88	21	TF-IDF	40.2346	0.814192
gpt2	nme	88	21	TF-IDF	32.7137	0.661998
gpt2	fool	88	21	TF-IDF	45.853	0.927887
gpt2	inquisitr	88	21	TF-IDF	35.4616	0.717604
gpt2	mashable	88	21	TF-IDF	39.4324	0.797959
gpt2	tripadv	88	21	TF-IDF	33.6724	0.681399
gpt2	ncbi	88	21	TF-IDF	37.574	0.760353
gpt2	yelp	88	21	TF-IDF	32.611	0.65992
gpt2	reuters	88	21	Entropy	897.275	35.1433
gpt2	techcrunch	88	21	Entropy	674.367	26.4127
gpt2	fastcompany	88	21	Entropy	766.643	30.0269
gpt2	nme	88	21	Entropy	148.944	5.83364
gpt2	fool	88	21	Entropy	1790.92	70.1445
gpt2	inquisitr	88	21	Entropy	731.477	28.6495
gpt2	mashable	88	21	Entropy	621.921	24.3586
gpt2	tripadv	88	21	Entropy	238.195	9.32932
gpt2	ncbi	88	21	Entropy	1595.22	62.4794
gpt2	yelp	88	21	Entropy	764.707	29.951
gpt2	reuters	88	21	Prior	407.12	15.9455
gpt2	techcrunch	88	21	Prior	393.712	15.4204
gpt2	fastcompany	88	21	Prior	402.55	15.7666
gpt2	nme	88	21	Prior	416.616	16.3175
gpt2	fool	88	21	Prior	396.002	15.5101
gpt2	inquisitr	88	21	Prior	385.139	15.0846
gpt2	mashable	88	21	Prior	429.212	16.8108
gpt2	tripadv	88	21	Prior	398.787	15.6191
gpt2	ncbi	88	21	Prior	392.533	15.3742
gpt2	yelp	88	21	Prior	403.187	15.7915
