# Supplementary material
Source: ML conference proceedings conference paper supplement (https://aclanthology.org/2024.findings-eacl.77)
Supplement: software [file experimental_results.xlsx]

## Sheet: Sheet1
model	combination_strategy	weighting	eval_dataset	value	seed	chosen_adapters	topk	weights
gpt2			fastcompany	27.6506	5
gpt2	average	uniform	fastcompany	22.8044	5		21
gpt2	average	Sentence Sim	fastcompany	22.4857	5		21	0.04850287226789269-0.07998413843244827-0.03126525669536127-0.06727258678674013-0.04817308704613251-0.02237013954673157-0.09541121677610226-0.008266444824818081-0.04529785681291747-0.03285536390480916-0.0701140076908675-0.03080887650901671-0.06345867763923825-0.0676364708424807-0.0719031670016303-0.06252655706385037-0.02760435298942938-0.02477679869817948-0.013336886100343334-0.01121687609748166-…
gpt2	average	TF-IDF	fastcompany	22.8397	5		21	0.050132692517465265-0.07345776872973632-0.06494800640003826-0.03642437572162893-0.048749217429614-0.032755877025099786-0.07740686826496182-0.036271881142118656-0.028916766839434362-0.051739059865995474-0.05684852855058466-0.03403148151308594-0.04279420875454974-0.04244352242874371-0.06739065114810142-0.043885109754109-0.04976925636267895-0.02424804982006528-0.0307347030991646-0.02422522759682909…
gpt2	average	Entropy	fastcompany	22.8029	5		21	0.04769030299558967-0.04768027951199954-0.047667392175955094-0.04766166447104645-0.04755283807778223-0.047618706684231626-0.04768743914313535-0.04760581934818718-0.04748983332378716-0.047643049430093364-0.04760438742196002-0.04758434045477977-0.04766023254481929-0.0475284953319205-0.04770605418408844-0.04767598373331806-0.047537086889283466-0.04748983332378716-0.04763016209404891-0.04760009164327…
gpt2	ensemble	uniform	fastcompany	21.9308	5		21
gpt2	ensemble	Sentence Sim	fastcompany	21.6753	5		21	0.04850287226789269-0.07998413843244827-0.03126525669536127-0.06727258678674013-0.04817308704613251-0.02237013954673157-0.09541121677610226-0.008266444824818081-0.04529785681291747-0.03285536390480916-0.0701140076908675-0.03080887650901671-0.06345867763923825-0.0676364708424807-0.0719031670016303-0.06252655706385037-0.02760435298942938-0.02477679869817948-0.013336886100343334-0.01121687609748166-…
gpt2	ensemble	TF-IDF	fastcompany	21.633	5		21	0.050132692517465265-0.07345776872973632-0.06494800640003826-0.03642437572162893-0.048749217429614-0.032755877025099786-0.07740686826496182-0.036271881142118656-0.028916766839434362-0.051739059865995474-0.05684852855058466-0.03403148151308594-0.04279420875454974-0.04244352242874371-0.06739065114810142-0.043885109754109-0.04976925636267895-0.02424804982006528-0.0307347030991646-0.02422522759682909…
gpt2	ensemble	Entropy	fastcompany	21.9308	5		21	0.04769030299558967-0.04768027951199954-0.047667392175955094-0.04766166447104645-0.04755283807778223-0.047618706684231626-0.04768743914313535-0.04760581934818718-0.04748983332378716-0.047643049430093364-0.04760438742196002-0.04758434045477977-0.04766023254481929-0.0475284953319205-0.04770605418408844-0.04767598373331806-0.047537086889283466-0.04748983332378716-0.04763016209404891-0.04760009164327…
deberta			fastcompany	147644	5
gpt2-large			fastcompany	17.4826	5
gpt2-large	average	uniform	fastcompany	15.5389	5		21
gpt2-large	ensemble	uniform	fastcompany	14.7812	5		21
gpt2	ensemble	uniform	fastcompany	21.9308	10		21
gpt2-large	average	TF-IDF	fastcompany	15.3789	5		21	0.050132692517465265-0.07345776872973632-0.06494800640003826-0.03642437572162893-0.048749217429614-0.032755877025099786-0.07740686826496182-0.036271881142118656-0.028916766839434362-0.051739059865995474-0.05684852855058466-0.03403148151308594-0.04279420875454974-0.04244352242874371-0.06739065114810142-0.043885109754109-0.04976925636267895-0.02424804982006528-0.0307347030991646-0.02422522759682909…
gpt2	ensemble	uniform	fastcompany	21.9308	42		21
gpt2-large	average	uniform	fastcompany	15.5389	10		21
gpt2-large	ensemble	uniform	fastcompany	14.7812	10		21
gpt2	average	uniform	fastcompany	22.8044	42		21
gpt2	ensemble	TF-IDF	fastcompany	21.6753	42		21	0.05181629389084335-0.07864607498575095-0.060652184489986834-0.031104441168822074-0.043368843659925334-0.03785984279003079-0.0770028088944612-0.03212687187998776-0.03204162547690602-0.04306285005592733-0.05367736821052844-0.03442282266088684-0.05221000334260019-0.04726045176062813-0.0663449589798706-0.048739987130927476-0.04843707948445367-0.02595979348288395-0.02936465347645945-0.024330463644569…
gpt2	average	TF-IDF	fastcompany	22.4436	42		21	0.05181629389084335-0.07864607498575095-0.060652184489986834-0.031104441168822074-0.043368843659925334-0.03785984279003079-0.0770028088944612-0.03212687187998776-0.03204162547690602-0.04306285005592733-0.05367736821052844-0.03442282266088684-0.05221000334260019-0.04726045176062813-0.0663449589798706-0.048739987130927476-0.04843707948445367-0.02595979348288395-0.02936465347645945-0.024330463644569…
gpt2	ensemble	Sentence Sim	fastcompany	21.7176	42		21	0.04617705128258022-0.07816437774982647-0.03714092365314237-0.06341815176719247-0.049276393709730686-0.025134181333418285-0.09318137731286624-0.017191758296955333-0.04622268105478119-0.024965512803520273-0.0756168086637353-0.03089784685942416-0.062267972072569504-0.0730880520517288-0.06587540701845648-0.05988420554663313-0.02617533158030446-0.022203685253294466-0.013875937399848923-0.016166824834…
gpt2	average	uniform	fastcompany	22.8044	10		21
gpt2	ensemble	TF-IDF	fastcompany	21.6753	10		21	0.05078315867810096-0.07082322588884205-0.06324515639595395-0.03286779755990311-0.046776916580390696-0.03413572564386526-0.07584772240403065-0.036688261854920176-0.02869940280538257-0.05194496902564077-0.058278797701492885-0.035830613576876044-0.04855173107320823-0.04367488784392633-0.0648220972325372-0.04211443337050175-0.048758773489340546-0.02451490918708909-0.03219876679728971-0.0248053192346…
gpt2	average	TF-IDF	fastcompany	22.4419	10		21	0.05078315867810096-0.07082322588884205-0.06324515639595395-0.03286779755990311-0.046776916580390696-0.03413572564386526-0.07584772240403065-0.036688261854920176-0.02869940280538257-0.05194496902564077-0.058278797701492885-0.035830613576876044-0.04855173107320823-0.04367488784392633-0.0648220972325372-0.04211443337050175-0.048758773489340546-0.02451490918708909-0.03219876679728971-0.0248053192346…
gpt2	ensemble	Sentence Sim	fastcompany	21.6753	10		21	0.047601017960356776-0.07943474757178773-0.027623624475887697-0.058906149392097054-0.04579691403262071-0.023825956929437495-0.09348732153469123-0.012593032178421358-0.047701051382069884-0.028961374683236084-0.08220790250390123-0.03114021949091269-0.06158589114299933-0.06619669382917233-0.06545152948284913-0.0619265240373814-0.03108681199638544-0.025111881464525518-0.01802073136206165-0.0133300282…
gpt2	average	Sentence Sim	fastcompany	22.5151	42		21	0.04617705128258022-0.07816437774982647-0.03714092365314237-0.06341815176719247-0.049276393709730686-0.025134181333418285-0.09318137731286624-0.017191758296955333-0.04622268105478119-0.024965512803520273-0.0756168086637353-0.03089784685942416-0.062267972072569504-0.0730880520517288-0.06587540701845648-0.05988420554663313-0.02617533158030446-0.022203685253294466-0.013875937399848923-0.016166824834…
gpt2	average	Sentence Sim	fastcompany	22.4955	10		21	0.047601017960356776-0.07943474757178773-0.027623624475887697-0.058906149392097054-0.04579691403262071-0.023825956929437495-0.09348732153469123-0.012593032178421358-0.047701051382069884-0.028961374683236084-0.08220790250390123-0.03114021949091269-0.06158589114299933-0.06619669382917233-0.06545152948284913-0.0619265240373814-0.03108681199638544-0.025111881464525518-0.01802073136206165-0.0133300282…
gpt2	ensemble	Prior	fastcompany	22.1893	10		21	0.037384033203125-0.039794921875-0.04193115234375-0.05780029296875-0.050018310546875-0.046600341796875-0.03717041015625-0.04449462890625-0.07672119140625-0.039276123046875-0.043792724609375-0.056427001953125-0.045684814453125-0.054443359375-0.035369873046875-0.04058837890625-0.04571533203125-0.07452392578125-0.04473876953125-0.04583740234375-0.0416259765625
gpt2	average	Prior	fastcompany	23.0601	10		21	0.037384033203125-0.039794921875-0.04193115234375-0.05780029296875-0.050018310546875-0.046600341796875-0.03717041015625-0.04449462890625-0.07672119140625-0.039276123046875-0.043792724609375-0.056427001953125-0.045684814453125-0.054443359375-0.035369873046875-0.04058837890625-0.04571533203125-0.07452392578125-0.04473876953125-0.04583740234375-0.0416259765625
gpt2	ensemble	Entropy	fastcompany	21.9308	10		21	0.04769030299558967-0.04768027951199954-0.047667392175955094-0.04766166447104645-0.04755283807778223-0.047618706684231626-0.04768743914313535-0.04760581934818718-0.04748983332378716-0.047643049430093364-0.04760438742196002-0.04758434045477977-0.04766023254481929-0.0475284953319205-0.04770605418408844-0.04767598373331806-0.047537086889283466-0.04748983332378716-0.04763016209404891-0.04760009164327…
gpt2	average	Entropy	fastcompany	22.8029	10		21	0.04769030299558967-0.04768027951199954-0.047667392175955094-0.04766166447104645-0.04755283807778223-0.047618706684231626-0.04768743914313535-0.04760581934818718-0.04748983332378716-0.047643049430093364-0.04760438742196002-0.04758434045477977-0.04766023254481929-0.0475284953319205-0.04770605418408844-0.04767598373331806-0.047537086889283466-0.04748983332378716-0.04763016209404891-0.04760009164327…
gpt2	ensemble	Prior	fastcompany	22.1893	42		21	0.037384033203125-0.039794921875-0.04193115234375-0.05780029296875-0.050018310546875-0.046600341796875-0.03717041015625-0.04449462890625-0.07672119140625-0.039276123046875-0.043792724609375-0.056427001953125-0.045684814453125-0.054443359375-0.035369873046875-0.04058837890625-0.04571533203125-0.07452392578125-0.04473876953125-0.04583740234375-0.0416259765625
gpt2	average	Prior	fastcompany	23.0601	42		21	0.037384033203125-0.039794921875-0.04193115234375-0.05780029296875-0.050018310546875-0.046600341796875-0.03717041015625-0.04449462890625-0.07672119140625-0.039276123046875-0.043792724609375-0.056427001953125-0.045684814453125-0.054443359375-0.035369873046875-0.04058837890625-0.04571533203125-0.07452392578125-0.04473876953125-0.04583740234375-0.0416259765625
gpt2	ensemble	Entropy	fastcompany	21.9308	42		21	0.04769030299558967-0.04768027951199954-0.047667392175955094-0.04766166447104645-0.04755283807778223-0.047618706684231626-0.04768743914313535-0.04760581934818718-0.04748983332378716-0.047643049430093364-0.04760438742196002-0.04758434045477977-0.04766023254481929-0.0475284953319205-0.04770605418408844-0.04767598373331806-0.047537086889283466-0.04748983332378716-0.04763016209404891-0.04760009164327…
gpt2	average	Entropy	fastcompany	22.8029	42		21	0.04769030299558967-0.04768027951199954-0.047667392175955094-0.04766166447104645-0.04755283807778223-0.047618706684231626-0.04768743914313535-0.04760581934818718-0.04748983332378716-0.047643049430093364-0.04760438742196002-0.04758434045477977-0.04766023254481929-0.0475284953319205-0.04770605418408844-0.04767598373331806-0.047537086889283466-0.04748983332378716-0.04763016209404891-0.04760009164327…
gpt2-large	ensemble	TF-IDF	fastcompany	14.6662	5		21	0.050132692517465265-0.07345776872973632-0.06494800640003826-0.03642437572162893-0.048749217429614-0.032755877025099786-0.07740686826496182-0.036271881142118656-0.028916766839434362-0.051739059865995474-0.05684852855058466-0.03403148151308594-0.04279420875454974-0.04244352242874371-0.06739065114810142-0.043885109754109-0.04976925636267895-0.02424804982006528-0.0307347030991646-0.02422522759682909…
gpt2-large	average	Sentence Sim	fastcompany	15.3966	5		21	0.04850287226789269-0.07998413843244827-0.03126525669536127-0.06727258678674013-0.04817308704613251-0.02237013954673157-0.09541121677610226-0.008266444824818081-0.04529785681291747-0.03285536390480916-0.0701140076908675-0.03080887650901671-0.06345867763923825-0.0676364708424807-0.0719031670016303-0.06252655706385037-0.02760435298942938-0.02477679869817948-0.013336886100343334-0.01121687609748166-…
gpt2-large	average	TF-IDF	fastcompany	15.3832	10		21	0.05078315867810096-0.07082322588884205-0.06324515639595395-0.03286779755990311-0.046776916580390696-0.03413572564386526-0.07584772240403065-0.036688261854920176-0.02869940280538257-0.05194496902564077-0.058278797701492885-0.035830613576876044-0.04855173107320823-0.04367488784392633-0.0648220972325372-0.04211443337050175-0.048758773489340546-0.02451490918708909-0.03219876679728971-0.0248053192346…
gpt2-large	ensemble	TF-IDF	fastcompany	14.6662	10		21	0.05078315867810096-0.07082322588884205-0.06324515639595395-0.03286779755990311-0.046776916580390696-0.03413572564386526-0.07584772240403065-0.036688261854920176-0.02869940280538257-0.05194496902564077-0.058278797701492885-0.035830613576876044-0.04855173107320823-0.04367488784392633-0.0648220972325372-0.04211443337050175-0.048758773489340546-0.02451490918708909-0.03219876679728971-0.0248053192346…
gpt2-large	ensemble	Sentence Sim	fastcompany	14.6376	5		21	0.04850287226789269-0.07998413843244827-0.03126525669536127-0.06727258678674013-0.04817308704613251-0.02237013954673157-0.09541121677610226-0.008266444824818081-0.04529785681291747-0.03285536390480916-0.0701140076908675-0.03080887650901671-0.06345867763923825-0.0676364708424807-0.0719031670016303-0.06252655706385037-0.02760435298942938-0.02477679869817948-0.013336886100343334-0.01121687609748166-…
gpt2-large	average	Sentence Sim	fastcompany	15.4008	10		21	0.047601017960356776-0.07943474757178773-0.027623624475887697-0.058906149392097054-0.04579691403262071-0.023825956929437495-0.09348732153469123-0.012593032178421358-0.047701051382069884-0.028961374683236084-0.08220790250390123-0.03114021949091269-0.06158589114299933-0.06619669382917233-0.06545152948284913-0.0619265240373814-0.03108681199638544-0.025111881464525518-0.01802073136206165-0.0133300282…
gpt2-large	ensemble	Sentence Sim	fastcompany	14.6662	10		21	0.047601017960356776-0.07943474757178773-0.027623624475887697-0.058906149392097054-0.04579691403262071-0.023825956929437495-0.09348732153469123-0.012593032178421358-0.047701051382069884-0.028961374683236084-0.08220790250390123-0.03114021949091269-0.06158589114299933-0.06619669382917233-0.06545152948284913-0.0619265240373814-0.03108681199638544-0.025111881464525518-0.01802073136206165-0.0133300282…
gpt2-large	average	uniform	fastcompany	15.5389	42		21
gpt2	ensemble	uniform	fastcompany	21.9308	88		21
gpt2	average	uniform	fastcompany	22.8044	88		21
gpt2	ensemble	TF-IDF	fastcompany	21.633	88		21	0.0502062150252664-0.07401750495062416-0.06464641388797014-0.03499668575517978-0.047020213553526334-0.034560975223651084-0.07473007723015139-0.03829598345265988-0.032768004834229966-0.044603129696042694-0.05868383171785983-0.034743681249530374-0.043862287341737353-0.04361124078503695-0.07218147111663575-0.04193247200999226-0.047947775748418915-0.02407718275859668-0.027971251630678623-0.0261259206…
gpt2	average	TF-IDF	fastcompany	22.4326	88		21	0.0502062150252664-0.07401750495062416-0.06464641388797014-0.03499668575517978-0.047020213553526334-0.034560975223651084-0.07473007723015139-0.03829598345265988-0.032768004834229966-0.044603129696042694-0.05868383171785983-0.034743681249530374-0.043862287341737353-0.04361124078503695-0.07218147111663575-0.04193247200999226-0.047947775748418915-0.02407718275859668-0.027971251630678623-0.0261259206…
gpt2	ensemble	Sentence Sim	fastcompany	21.7176	88		21	0.04398641980723757-0.07587101158007008-0.0300176121758914-0.06184361740262769-0.04638042000060601-0.02785180766042949-0.08896819249627734-0.013503535945356093-0.04333873497248866-0.03224319922054437-0.07994335531447642-0.03485647103795122-0.0659343192286618-0.06408649444656628-0.06932022277478643-0.06039112976836793-0.03016873287142567-0.025307039635056813-0.01344880831387346-0.01339500554171938…
gpt2	average	Sentence Sim	fastcompany	22.5021	88		21	0.04398641980723757-0.07587101158007008-0.0300176121758914-0.06184361740262769-0.04638042000060601-0.02785180766042949-0.08896819249627734-0.013503535945356093-0.04333873497248866-0.03224319922054437-0.07994335531447642-0.03485647103795122-0.0659343192286618-0.06408649444656628-0.06932022277478643-0.06039112976836793-0.03016873287142567-0.025307039635056813-0.01344880831387346-0.01339500554171938…
gpt2-large	ensemble	uniform	fastcompany	14.7812	42		21
gpt2-large	average	Prior	fastcompany	15.6073	10		21	0.041046142578125-0.036651611328125-0.043548583984375-0.047119140625-0.042724609375-0.054962158203125-0.036956787109375-0.04638671875-0.060028076171875-0.04095458984375-0.041900634765625-0.055084228515625-0.05291748046875-0.0494384765625-0.036102294921875-0.041015625-0.042816162109375-0.08489990234375-0.050201416015625-0.05438232421875-0.04083251953125
gpt2	ensemble	Prior	fastcompany	22.1893	88		21	0.037384033203125-0.039794921875-0.04193115234375-0.05780029296875-0.050018310546875-0.046600341796875-0.03717041015625-0.04449462890625-0.07672119140625-0.039276123046875-0.043792724609375-0.056427001953125-0.045684814453125-0.054443359375-0.035369873046875-0.04058837890625-0.04571533203125-0.07452392578125-0.04473876953125-0.04583740234375-0.0416259765625
gpt2	average	Prior	fastcompany	23.0601	88		21	0.037384033203125-0.039794921875-0.04193115234375-0.05780029296875-0.050018310546875-0.046600341796875-0.03717041015625-0.04449462890625-0.07672119140625-0.039276123046875-0.043792724609375-0.056427001953125-0.045684814453125-0.054443359375-0.035369873046875-0.04058837890625-0.04571533203125-0.07452392578125-0.04473876953125-0.04583740234375-0.0416259765625
gpt2	ensemble	Entropy	fastcompany	21.9308	88		21	0.04769030299558967-0.04768027951199954-0.047667392175955094-0.04766166447104645-0.04755283807778223-0.047618706684231626-0.04768743914313535-0.04760581934818718-0.04748983332378716-0.047643049430093364-0.04760438742196002-0.04758434045477977-0.04766023254481929-0.0475284953319205-0.04770605418408844-0.04767598373331806-0.047537086889283466-0.04748983332378716-0.04763016209404891-0.04760009164327…
gpt2-large	average	Prior	fastcompany	15.6073	5		21	0.041046142578125-0.036651611328125-0.043548583984375-0.047119140625-0.042724609375-0.054962158203125-0.036956787109375-0.04638671875-0.060028076171875-0.04095458984375-0.041900634765625-0.055084228515625-0.05291748046875-0.0494384765625-0.036102294921875-0.041015625-0.042816162109375-0.08489990234375-0.050201416015625-0.05438232421875-0.04083251953125
gpt2-large	average	TF-IDF	fastcompany	15.3861	42		21	0.05181629389084335-0.07864607498575095-0.060652184489986834-0.031104441168822074-0.043368843659925334-0.03785984279003079-0.0770028088944612-0.03212687187998776-0.03204162547690602-0.04306285005592733-0.05367736821052844-0.03442282266088684-0.05221000334260019-0.04726045176062813-0.0663449589798706-0.048739987130927476-0.04843707948445367-0.02595979348288395-0.02936465347645945-0.024330463644569…
gpt2-large	ensemble	TF-IDF	fastcompany	14.6662	42		21	0.05181629389084335-0.07864607498575095-0.060652184489986834-0.031104441168822074-0.043368843659925334-0.03785984279003079-0.0770028088944612-0.03212687187998776-0.03204162547690602-0.04306285005592733-0.05367736821052844-0.03442282266088684-0.05221000334260019-0.04726045176062813-0.0663449589798706-0.048739987130927476-0.04843707948445367-0.02595979348288395-0.02936465347645945-0.024330463644569…
gpt2	average	Entropy	fastcompany	22.8029	88		21	0.04769030299558967-0.04768027951199954-0.047667392175955094-0.04766166447104645-0.04755283807778223-0.047618706684231626-0.04768743914313535-0.04760581934818718-0.04748983332378716-0.047643049430093364-0.04760438742196002-0.04758434045477977-0.04766023254481929-0.0475284953319205-0.04770605418408844-0.04767598373331806-0.047537086889283466-0.04748983332378716-0.04763016209404891-0.04760009164327…
gpt2-large	ensemble	Prior	fastcompany	14.8972	5		21	0.041046142578125-0.036651611328125-0.043548583984375-0.047119140625-0.042724609375-0.054962158203125-0.036956787109375-0.04638671875-0.060028076171875-0.04095458984375-0.041900634765625-0.055084228515625-0.05291748046875-0.0494384765625-0.036102294921875-0.041015625-0.042816162109375-0.08489990234375-0.050201416015625-0.05438232421875-0.04083251953125
gpt2-large	ensemble	Prior	fastcompany	14.8972	10		21	0.041046142578125-0.036651611328125-0.043548583984375-0.047119140625-0.042724609375-0.054962158203125-0.036956787109375-0.04638671875-0.060028076171875-0.04095458984375-0.041900634765625-0.055084228515625-0.05291748046875-0.0494384765625-0.036102294921875-0.041015625-0.042816162109375-0.08489990234375-0.050201416015625-0.05438232421875-0.04083251953125
gpt2-large	average	Sentence Sim	fastcompany	15.4112	42		21	0.04617705128258022-0.07816437774982647-0.03714092365314237-0.06341815176719247-0.049276393709730686-0.025134181333418285-0.09318137731286624-0.017191758296955333-0.04622268105478119-0.024965512803520273-0.0756168086637353-0.03089784685942416-0.062267972072569504-0.0730880520517288-0.06587540701845648-0.05988420554663313-0.02617533158030446-0.022203685253294466-0.013875937399848923-0.016166824834…
gpt2-large	ensemble	Sentence Sim	fastcompany	14.6662	42		21	0.04617705128258022-0.07816437774982647-0.03714092365314237-0.06341815176719247-0.049276393709730686-0.025134181333418285-0.09318137731286624-0.017191758296955333-0.04622268105478119-0.024965512803520273-0.0756168086637353-0.03089784685942416-0.062267972072569504-0.0730880520517288-0.06587540701845648-0.05988420554663313-0.02617533158030446-0.022203685253294466-0.013875937399848923-0.016166824834…
gpt2-large	average	Entropy	fastcompany	15.5386	5		21	0.047654602951510895-0.04765811665495432-0.04765635980323261-0.04765108924806746-0.0476194659170766-0.04758257203092059-0.047677442023893186-0.04758608573436402-0.04756500351370344-0.04765635980323261-0.04763879128601546-0.047587842586085734-0.04762473647224174-0.04761419536191146-0.04769501054111033-0.04764757554462403-0.047630007027406884-0.04744553759662685-0.047579058327477164-0.0475860857343…
gpt2-large	average	Prior	fastcompany	15.6073	42		21	0.041046142578125-0.036651611328125-0.043548583984375-0.047119140625-0.042724609375-0.054962158203125-0.036956787109375-0.04638671875-0.060028076171875-0.04095458984375-0.041900634765625-0.055084228515625-0.05291748046875-0.0494384765625-0.036102294921875-0.041015625-0.042816162109375-0.08489990234375-0.050201416015625-0.05438232421875-0.04083251953125
gpt2	ensemble	TF-IDF	fastcompany	21.0084	5	78_www.wired.com-17_www.express.co.uk-91_www.entrepreneur.com-85_www.pcworld.com-58_medium.com	5	0.0-0.20068781352722814-0.1774390050606004-0.0-0.0-0.0-0.21147681739748825-0.0-0.0-0.0-0.0-0.0-0.0-0.0-0.184112350061265-0.0-0.0-0.0-0.0-0.0-0.22628401395341818
gpt2	average	TF-IDF	fastcompany	21.4578	5	78_www.wired.com-17_www.express.co.uk-91_www.entrepreneur.com-85_www.pcworld.com-58_medium.com	5	0.0-0.20068781352722814-0.1774390050606004-0.0-0.0-0.0-0.21147681739748825-0.0-0.0-0.0-0.0-0.0-0.0-0.0-0.184112350061265-0.0-0.0-0.0-0.0-0.0-0.22628401395341818
gpt2	ensemble	Sentence Sim	fastcompany	21.0084	5	78_www.wired.com-91_www.entrepreneur.com-10_www.eventbrite.com-85_www.pcworld.com-58_medium.com	5	0.0-0.20268088283960622-0.0-0.0-0.0-0.0-0.24177330690776475-0.0-0.0-0.0-0.17766983875446596-0.0-0.0-0.0-0.1822035925180621-0.0-0.0-0.0-0.0-0.0-0.19567237898010098
gpt2	average	Sentence Sim	fastcompany	21.4202	5	78_www.wired.com-91_www.entrepreneur.com-10_www.eventbrite.com-85_www.pcworld.com-58_medium.com	5	0.0-0.20268088283960622-0.0-0.0-0.0-0.0-0.24177330690776475-0.0-0.0-0.0-0.17766983875446596-0.0-0.0-0.0-0.1822035925180621-0.0-0.0-0.0-0.0-0.0-0.19567237898010098
gpt2	ensemble	TF-IDF	fastcompany	21.0084	10	78_www.wired.com-17_www.express.co.uk-91_www.entrepreneur.com-85_www.pcworld.com-58_medium.com	5	0.0-0.1970730305140025-0.1759862598725023-0.0-0.0-0.0-0.21105421737224278-0.0-0.0-0.0-0.0-0.0-0.0-0.0-0.1803742626174565-0.0-0.0-0.0-0.0-0.0-0.23551222962379592
gpt2	average	TF-IDF	fastcompany	21.4525	10	78_www.wired.com-17_www.express.co.uk-91_www.entrepreneur.com-85_www.pcworld.com-58_medium.com	5	0.0-0.1970730305140025-0.1759862598725023-0.0-0.0-0.0-0.21105421737224278-0.0-0.0-0.0-0.0-0.0-0.0-0.0-0.1803742626174565-0.0-0.0-0.0-0.0-0.0-0.23551222962379592
gpt2-large	ensemble	Entropy	fastcompany	15.5386	10		21	0.047654602951510895-0.04765811665495432-0.04765635980323261-0.04765108924806746-0.0476194659170766-0.04758257203092059-0.047677442023893186-0.04758608573436402-0.04756500351370344-0.04765635980323261-0.04763879128601546-0.047587842586085734-0.04762473647224174-0.04761419536191146-0.04769501054111033-0.04764757554462403-0.047630007027406884-0.04744553759662685-0.047579058327477164-0.0475860857343…
gpt2	ensemble	Prior	fastcompany	24.5134	5	["45_www.npr.org", "70_www.insiderpages.com", "22_forums.macrumors.com", "84_www.glassdoor.com", "39_www.booking.com"]	5
gpt2	average	Prior	fastcompany	24.8649	5	["45_www.npr.org", "70_www.insiderpages.com", "22_forums.macrumors.com", "84_www.glassdoor.com", "39_www.booking.com"]	5
gpt2	ensemble	Prior	fastcompany	22.3197	10	17_www.express.co.uk-81_www.librarything.com-91_www.entrepreneur.com-39_www.booking.com-journals.plos.org	5	0.0-0.0-0.22657095005088773-0.0-0.18658306516420392-0.0-0.18820671439479605-0.0-0.0-0.0-0.0-0.0-0.0-0.0-0.0-0.0-0.0-0.20871018388019824-0.18992908650991402-0.0-0.0
gpt2	average	Prior	fastcompany	24.8649	10	17_www.express.co.uk-81_www.librarything.com-91_www.entrepreneur.com-39_www.booking.com-journals.plos.org	5	0.0-0.0-0.22657095005088773-0.0-0.18658306516420392-0.0-0.18820671439479605-0.0-0.0-0.0-0.0-0.0-0.0-0.0-0.0-0.0-0.0-0.20871018388019824-0.18992908650991402-0.0-0.0
gpt2	ensemble	Prior	fastcompany	22.3197	42	17_www.express.co.uk-81_www.librarything.com-91_www.entrepreneur.com-39_www.booking.com-journals.plos.org	5	0.0-0.0-0.22657095005088773-0.0-0.18658306516420392-0.0-0.18820671439479605-0.0-0.0-0.0-0.0-0.0-0.0-0.0-0.0-0.0-0.0-0.20871018388019824-0.18992908650991402-0.0-0.0
gpt2	average	Prior	fastcompany	22.9012	42	17_www.express.co.uk-81_www.librarything.com-91_www.entrepreneur.com-39_www.booking.com-journals.plos.org	5	0.0-0.0-0.22657095005088773-0.0-0.18658306516420392-0.0-0.18820671439479605-0.0-0.0-0.0-0.0-0.0-0.0-0.0-0.0-0.0-0.0-0.20871018388019824-0.18992908650991402-0.0-0.0
gpt2	ensemble	Prior	fastcompany	22.761	88	15_www.dailymail.co.uk-17_www.express.co.uk-81_www.librarything.com-91_www.entrepreneur.com-39_www.booking.com	5	0.17256788520523347-0.0-0.24814698214475303-0.0-0.17430653046369826-0.0-0.1923898845298319-0.0-0.0-0.0-0.0-0.0-0.0-0.0-0.0-0.0-0.0-0.2125887176564834-0.0-0.0-0.0
gpt2	average	Prior	fastcompany	22.3197	88	15_www.dailymail.co.uk-17_www.express.co.uk-81_www.librarything.com-91_www.entrepreneur.com-39_www.booking.com	5	0.17256788520523347-0.0-0.24814698214475303-0.0-0.17430653046369826-0.0-0.1923898845298319-0.0-0.0-0.0-0.0-0.0-0.0-0.0-0.0-0.0-0.0-0.2125887176564834-0.0-0.0-0.0
gpt2	ensemble	TF-IDF	fastcompany	21.0084	42	78_www.wired.com-17_www.express.co.uk-91_www.entrepreneur.com-85_www.pcworld.com-58_medium.com	5	0.0-0.21593214939523347-0.1665277836791215-0.0-0.0-0.0-0.21142036696763253-0.0-0.0-0.0-0.0-0.0-0.0-0.0-0.18215797287604796-0.0-0.0-0.0-0.0-0.0-0.2239617270819646
gpt2	average	TF-IDF	fastcompany	21.4396	42	78_www.wired.com-17_www.express.co.uk-91_www.entrepreneur.com-85_www.pcworld.com-58_medium.com	5	0.0-0.21593214939523347-0.1665277836791215-0.0-0.0-0.0-0.21142036696763253-0.0-0.0-0.0-0.0-0.0-0.0-0.0-0.18215797287604796-0.0-0.0-0.0-0.0-0.0-0.2239617270819646
gpt2	ensemble	TF-IDF	fastcompany	21.0084	88	78_www.wired.com-17_www.express.co.uk-91_www.entrepreneur.com-85_www.pcworld.com-58_medium.com	5	0.0-0.20081085403348325-0.1753869114029876-0.0-0.0-0.0-0.20274407575053388-0.0-0.0-0.0-0.0-0.0-0.0-0.0-0.19582966042957115-0.0-0.0-0.0-0.0-0.0-0.22522849838342412
gpt2	average	TF-IDF	fastcompany	21.4589	88	78_www.wired.com-17_www.express.co.uk-91_www.entrepreneur.com-85_www.pcworld.com-58_medium.com	5	0.0-0.20081085403348325-0.1753869114029876-0.0-0.0-0.0-0.20274407575053388-0.0-0.0-0.0-0.0-0.0-0.0-0.0-0.19582966042957115-0.0-0.0-0.0-0.0-0.0-0.22522849838342412
gpt2-large	ensemble	Prior	fastcompany	14.8972	42		21	0.041046142578125-0.036651611328125-0.043548583984375-0.047119140625-0.042724609375-0.054962158203125-0.036956787109375-0.04638671875-0.060028076171875-0.04095458984375-0.041900634765625-0.055084228515625-0.05291748046875-0.0494384765625-0.036102294921875-0.041015625-0.042816162109375-0.08489990234375-0.050201416015625-0.05438232421875-0.04083251953125
gpt2-large	average	Entropy	fastcompany	15.5386	42		21	0.047654602951510895-0.04765811665495432-0.04765635980323261-0.04765108924806746-0.0476194659170766-0.04758257203092059-0.047677442023893186-0.04758608573436402-0.04756500351370344-0.04765635980323261-0.04763879128601546-0.047587842586085734-0.04762473647224174-0.04761419536191146-0.04769501054111033-0.04764757554462403-0.047630007027406884-0.04744553759662685-0.047579058327477164-0.0475860857343…
gpt2-large	ensemble	Entropy	fastcompany	14.7812	42		21	0.047654602951510895-0.04765811665495432-0.04765635980323261-0.04765108924806746-0.0476194659170766-0.04758257203092059-0.047677442023893186-0.04758608573436402-0.04756500351370344-0.04765635980323261-0.04763879128601546-0.047587842586085734-0.04762473647224174-0.04761419536191146-0.04769501054111033-0.04764757554462403-0.047630007027406884-0.04744553759662685-0.047579058327477164-0.0475860857343…
gpt2			fastcompany	26.888	10
gpt2			fastcompany	26.888	42
gpt2			fastcompany	26.888	88
gpt2-large			fastcompany	17.0176	10
gpt2-large			fastcompany	17.0176	42
gpt2-large			fastcompany	17.0176	88
gpt2-large	average	uniform	fastcompany	15.5389	88		21
gpt2-large	ensemble	uniform	fastcompany	14.7812	88		21
gpt2	ensemble	Entropy	fastcompany	21.0084	5	["15_www.dailymail.co.uk", "78_www.wired.com", "91_www.entrepreneur.com", "85_www.pcworld.com", "58_medium.com"]	5
gpt2	average	Entropy	fastcompany	21.4734	5	["15_www.dailymail.co.uk", "78_www.wired.com", "91_www.entrepreneur.com", "85_www.pcworld.com", "58_medium.com"]	5
deberta			fastcompany	90240.4	10
deberta			fastcompany	173814	42
deberta			fastcompany	76882.5	88
deberta	average	Sentence Sim	fastcompany	4.58039	5	91_www.entrepreneur.com-58_medium.com	2	0.0-0.0-0.0-0.0-0.0-0.0-0.5374975411388618-0.0-0.0-0.0-0.0-0.0-0.0-0.0-0.0-0.0-0.0-0.0-0.0-0.0-0.4625024588611383
deberta	average	TF-IDF	fastcompany	4.13422	5	58_medium.com	1	0.0-0.0-0.0-0.0-0.0-0.0-0.0-0.0-0.0-0.0-0.0-0.0-0.0-0.0-0.0-0.0-0.0-0.0-0.0-0.0-1.0
deberta	average	Sentence Sim	fastcompany	4.76184	10	91_www.entrepreneur.com-10_www.eventbrite.com	2	0.0-0.0-0.0-0.0-0.0-0.0-0.5385676698651176-0.0-0.0-0.0-0.46143233013488233-0.0-0.0-0.0-0.0-0.0-0.0-0.0-0.0-0.0-0.0
deberta	average	Sentence Sim	fastcompany	4.75403	42	91_www.entrepreneur.com-10_www.eventbrite.com	2	0.0-0.0-0.0-0.0-0.0-0.0-0.5440379495304337-0.0-0.0-0.0-0.4559620504695663-0.0-0.0-0.0-0.0-0.0-0.0-0.0-0.0-0.0-0.0
deberta	average	Sentence Sim	fastcompany	4.44347	88	78_www.wired.com-91_www.entrepreneur.com	2	0.0-0.47142079509347323-0.0-0.0-0.0-0.0-0.5285792049065268-0.0-0.0-0.0-0.0-0.0-0.0-0.0-0.0-0.0-0.0-0.0-0.0-0.0-0.0
deberta	average	TF-IDF	fastcompany	4.58282	5	91_www.entrepreneur.com-58_medium.com	2	0.0-0.0-0.0-0.0-0.0-0.0-0.46247154400212737-0.0-0.0-0.0-0.0-0.0-0.0-0.0-0.0-0.0-0.0-0.0-0.0-0.0-0.5375284559978726
gpt2-large	average	Entropy	fastcompany	15.5386	10		21	0.047654602951510895-0.04765811665495432-0.04765635980323261-0.04765108924806746-0.0476194659170766-0.04758257203092059-0.047677442023893186-0.04758608573436402-0.04756500351370344-0.04765635980323261-0.04763879128601546-0.047587842586085734-0.04762473647224174-0.04761419536191146-0.04769501054111033-0.04764757554462403-0.047630007027406884-0.04744553759662685-0.047579058327477164-0.0475860857343…
gpt2-large	average	TF-IDF	fastcompany	15.3812	88		21	0.0502062150252664-0.07401750495062416-0.06464641388797014-0.03499668575517978-0.047020213553526334-0.034560975223651084-0.07473007723015139-0.03829598345265988-0.032768004834229966-0.044603129696042694-0.05868383171785983-0.034743681249530374-0.043862287341737353-0.04361124078503695-0.07218147111663575-0.04193247200999226-0.047947775748418915-0.02407718275859668-0.027971251630678623-0.0261259206…
gpt2-large	ensemble	TF-IDF	fastcompany	14.6662	88		21	0.0502062150252664-0.07401750495062416-0.06464641388797014-0.03499668575517978-0.047020213553526334-0.034560975223651084-0.07473007723015139-0.03829598345265988-0.032768004834229966-0.044603129696042694-0.05868383171785983-0.034743681249530374-0.043862287341737353-0.04361124078503695-0.07218147111663575-0.04193247200999226-0.047947775748418915-0.02407718275859668-0.027971251630678623-0.0261259206…
gpt2-large	ensemble	Prior	fastcompany	15.9512	5	37_www.instructables.com-70_www.insiderpages.com-22_forums.macrumors.com-39_www.booking.com-www.frontiersin.org	5	0.0-0.0-0.0-0.0-0.0-0.17766597612705928-0.0-0.0-0.1940416296734734-0.0-0.0-0.17806057018841867-0.0-0.0-0.0-0.0-0.0-0.2744401696754464-0.0-0.17579165433560226-0.0
gpt2-large	average	Prior	fastcompany	16.2015	5	37_www.instructables.com-70_www.insiderpages.com-22_forums.macrumors.com-39_www.booking.com-www.frontiersin.org	5	0.0-0.0-0.0-0.0-0.0-0.17766597612705928-0.0-0.0-0.1940416296734734-0.0-0.0-0.17806057018841867-0.0-0.0-0.0-0.0-0.0-0.2744401696754464-0.0-0.17579165433560226-0.0
gpt2-large	average	Sentence Sim	fastcompany	15.3992	88		21	0.04398641980723757-0.07587101158007008-0.0300176121758914-0.06184361740262769-0.04638042000060601-0.02785180766042949-0.08896819249627734-0.013503535945356093-0.04333873497248866-0.03224319922054437-0.07994335531447642-0.03485647103795122-0.0659343192286618-0.06408649444656628-0.06932022277478643-0.06039112976836793-0.03016873287142567-0.025307039635056813-0.01344880831387346-0.01339500554171938…
gpt2-large	ensemble	Sentence Sim	fastcompany	14.6662	88		21	0.04398641980723757-0.07587101158007008-0.0300176121758914-0.06184361740262769-0.04638042000060601-0.02785180766042949-0.08896819249627734-0.013503535945356093-0.04333873497248866-0.03224319922054437-0.07994335531447642-0.03485647103795122-0.0659343192286618-0.06408649444656628-0.06932022277478643-0.06039112976836793-0.03016873287142567-0.025307039635056813-0.01344880831387346-0.01339500554171938…
deberta	ensemble	uniform	fastcompany	4.11665	5		21
gpt2-large	ensemble	Entropy	fastcompany	14.7812	5		21	0.047654602951510895-0.04765811665495432-0.04765635980323261-0.04765108924806746-0.0476194659170766-0.04758257203092059-0.047677442023893186-0.04758608573436402-0.04756500351370344-0.04765635980323261-0.04763879128601546-0.047587842586085734-0.04762473647224174-0.04761419536191146-0.04769501054111033-0.04764757554462403-0.047630007027406884-0.04744553759662685-0.047579058327477164-0.0475860857343…
gpt2-large	average	Prior	fastcompany	15.6073	88		21	0.041046142578125-0.036651611328125-0.043548583984375-0.047119140625-0.042724609375-0.054962158203125-0.036956787109375-0.04638671875-0.060028076171875-0.04095458984375-0.041900634765625-0.055084228515625-0.05291748046875-0.0494384765625-0.036102294921875-0.041015625-0.042816162109375-0.08489990234375-0.050201416015625-0.05438232421875-0.04083251953125
gpt2-large	ensemble	Prior	fastcompany	14.8972	88		21	0.041046142578125-0.036651611328125-0.043548583984375-0.047119140625-0.042724609375-0.054962158203125-0.036956787109375-0.04638671875-0.060028076171875-0.04095458984375-0.041900634765625-0.055084228515625-0.05291748046875-0.0494384765625-0.036102294921875-0.041015625-0.042816162109375-0.08489990234375-0.050201416015625-0.05438232421875-0.04083251953125
deberta	average	TF-IDF	fastcompany	4.72535	5	91_www.entrepreneur.com-85_www.pcworld.com-58_medium.com	3	0.0-0.0-0.0-0.0-0.0-0.0-0.31761219819536934-0.0-0.0-0.0-0.0-0.0-0.0-0.0-0.3132286681969164-0.0-0.0-0.0-0.0-0.0-0.36915913360771413
deberta	average	TF-IDF	fastcompany	5.03369	5	17_www.express.co.uk-91_www.entrepreneur.com-85_www.pcworld.com-58_medium.com	4	0.0-0.0-0.2282720710491438-0.0-0.0-0.0-0.24511020392284127-0.0-0.0-0.0-0.0-0.0-0.0-0.0-0.24172731139564127-0.0-0.0-0.0-0.0-0.0-0.28489041363237366
gpt2	ensemble	TF-IDF	fastcompany	21.1732	5	58_medium.com	1	0.0-0.0-0.0-0.0-0.0-0.0-0.0-0.0-0.0-0.0-0.0-0.0-0.0-0.0-0.0-0.0-0.0-0.0-0.0-0.0-1.0
gpt2	average	TF-IDF	fastcompany	21.285	5	58_medium.com	1	0.0-0.0-0.0-0.0-0.0-0.0-0.0-0.0-0.0-0.0-0.0-0.0-0.0-0.0-0.0-0.0-0.0-0.0-0.0-0.0-1.0
gpt2-large	average	Entropy	fastcompany	15.5389	88		21	0.047654602951510895-0.04765811665495432-0.04765635980323261-0.04765108924806746-0.0476194659170766-0.04758257203092059-0.047677442023893186-0.04758608573436402-0.04756500351370344-0.04765635980323261-0.04763879128601546-0.047587842586085734-0.04762473647224174-0.04761419536191146-0.04769501054111033-0.04764757554462403-0.047630007027406884-0.04744553759662685-0.047579058327477164-0.0475860857343…
gpt2-large	ensemble	Entropy	fastcompany	14.7812	88		21	0.047654602951510895-0.04765811665495432-0.04765635980323261-0.04765108924806746-0.0476194659170766-0.04758257203092059-0.047677442023893186-0.04758608573436402-0.04756500351370344-0.04765635980323261-0.04763879128601546-0.047587842586085734-0.04762473647224174-0.04761419536191146-0.04769501054111033-0.04764757554462403-0.047630007027406884-0.04744553759662685-0.047579058327477164-0.0475860857343…
gpt2	ensemble	Entropy	fastcompany	21.9308	5	85_www.pcworld.com	1	0.0-0.0-0.0-0.0-0.0-0.0-0.0-0.0-0.0-0.0-0.0-0.0-0.0-0.0-1.0-0.0-0.0-0.0-0.0-0.0-0.0
gpt2	average	Entropy	fastcompany	22.0521	5	85_www.pcworld.com	1	0.0-0.0-0.0-0.0-0.0-0.0-0.0-0.0-0.0-0.0-0.0-0.0-0.0-0.0-1.0-0.0-0.0-0.0-0.0-0.0-0.0
gpt2-large	average	TF-IDF	fastcompany	14.7583	42	78_www.wired.com-17_www.express.co.uk-91_www.entrepreneur.com-85_www.pcworld.com-58_medium.com	5	0.0-0.21593214939523347-0.1665277836791215-0.0-0.0-0.0-0.21142036696763253-0.0-0.0-0.0-0.0-0.0-0.0-0.0-0.18215797287604796-0.0-0.0-0.0-0.0-0.0-0.2239617270819646
gpt2-large	ensemble	TF-IDF	fastcompany	14.4107	42	78_www.wired.com-17_www.express.co.uk-91_www.entrepreneur.com-85_www.pcworld.com-58_medium.com	5	0.0-0.21593214939523347-0.1665277836791215-0.0-0.0-0.0-0.21142036696763253-0.0-0.0-0.0-0.0-0.0-0.0-0.0-0.18215797287604796-0.0-0.0-0.0-0.0-0.0-0.2239617270819646
gpt2	ensemble	Entropy	fastcompany	21.7601	5	15_www.dailymail.co.uk-85_www.pcworld.com	2	0.4982892690513219-0.0-0.0-0.0-0.0-0.0-0.0-0.0-0.0-0.0-0.0-0.0-0.0-0.0-0.501710730948678-0.0-0.0-0.0-0.0-0.0-0.0
gpt2	average	Entropy	fastcompany	22.1631	5	15_www.dailymail.co.uk-85_www.pcworld.com	2	0.4982892690513219-0.0-0.0-0.0-0.0-0.0-0.0-0.0-0.0-0.0-0.0-0.0-0.0-0.0-0.501710730948678-0.0-0.0-0.0-0.0-0.0-0.0
gpt2-large	average	Sentence Sim	fastcompany	14.9827	42	78_www.wired.com-91_www.entrepreneur.com-10_www.eventbrite.com-84_www.glassdoor.com-58_medium.com	5	0.0-0.19882773157187258-0.0-0.0-0.0-0.0-0.23702666622841606-0.0-0.0-0.0-0.19234744736835302-0.0-0.0-0.18591501669677715-0.0-0.0-0.0-0.0-0.0-0.0-0.18588313813458116
gpt2-large	ensemble	Sentence Sim	fastcompany	14.4954	42	78_www.wired.com-91_www.entrepreneur.com-10_www.eventbrite.com-84_www.glassdoor.com-58_medium.com	5	0.0-0.19882773157187258-0.0-0.0-0.0-0.0-0.23702666622841606-0.0-0.0-0.0-0.19234744736835302-0.0-0.0-0.18591501669677715-0.0-0.0-0.0-0.0-0.0-0.0-0.18588313813458116
gpt2	ensemble	TF-IDF	fastcompany	20.9674	5	91_www.entrepreneur.com-58_medium.com	2	0.0-0.0-0.0-0.0-0.0-0.0-0.48308757260187524-0.0-0.0-0.0-0.0-0.0-0.0-0.0-0.0-0.0-0.0-0.0-0.0-0.0-0.5169124273981248
gpt2	average	TF-IDF	fastcompany	21.2608	5	91_www.entrepreneur.com-58_medium.com	2	0.0-0.0-0.0-0.0-0.0-0.0-0.48308757260187524-0.0-0.0-0.0-0.0-0.0-0.0-0.0-0.0-0.0-0.0-0.0-0.0-0.0-0.5169124273981248
gpt2	ensemble	Sentence Sim	fastcompany	21.0495	5	78_www.wired.com-91_www.entrepreneur.com	2	0.0-0.45602198722619897-0.0-0.0-0.0-0.0-0.543978012773801-0.0-0.0-0.0-0.0-0.0-0.0-0.0-0.0-0.0-0.0-0.0-0.0-0.0-0.0
gpt2	average	Sentence Sim	fastcompany	21.2814	5	78_www.wired.com-91_www.entrepreneur.com	2	0.0-0.45602198722619897-0.0-0.0-0.0-0.0-0.543978012773801-0.0-0.0-0.0-0.0-0.0-0.0-0.0-0.0-0.0-0.0-0.0-0.0-0.0-0.0
gpt2	ensemble	Prior	fastcompany	26.8177	5	70_www.insiderpages.com-39_www.booking.com	2	0.0-0.0-0.0-0.0-0.0-0.0-0.0-0.0-0.5072639225181598-0.0-0.0-0.0-0.0-0.0-0.0-0.0-0.0-0.4927360774818402-0.0-0.0-0.0
gpt2	average	Prior	fastcompany	26.5278	5	70_www.insiderpages.com-39_www.booking.com	2	0.0-0.0-0.0-0.0-0.0-0.0-0.0-0.0-0.5072639225181598-0.0-0.0-0.0-0.0-0.0-0.0-0.0-0.0-0.4927360774818402-0.0-0.0-0.0
gpt2-large	average	Prior	fastcompany	16.2015	42	37_www.instructables.com-70_www.insiderpages.com-22_forums.macrumors.com-39_www.booking.com-www.frontiersin.org	5	0.0-0.0-0.0-0.0-0.0-0.17766597612705928-0.0-0.0-0.1940416296734734-0.0-0.0-0.17806057018841867-0.0-0.0-0.0-0.0-0.0-0.2744401696754464-0.0-0.17579165433560226-0.0
gpt2-large	ensemble	Prior	fastcompany	15.92	42	37_www.instructables.com-70_www.insiderpages.com-22_forums.macrumors.com-39_www.booking.com-www.frontiersin.org	5	0.0-0.0-0.0-0.0-0.0-0.17766597612705928-0.0-0.0-0.1940416296734734-0.0-0.0-0.17806057018841867-0.0-0.0-0.0-0.0-0.0-0.2744401696754464-0.0-0.17579165433560226-0.0
gpt2	ensemble	TF-IDF	fastcompany	20.8449	5	78_www.wired.com-91_www.entrepreneur.com-58_medium.com	3	0.0-0.3143366583001126-0.0-0.0-0.0-0.0-0.33123543936388866-0.0-0.0-0.0-0.0-0.0-0.0-0.0-0.0-0.0-0.0-0.0-0.0-0.0-0.35442790233599863
gpt2	average	TF-IDF	fastcompany	21.1853	5	78_www.wired.com-91_www.entrepreneur.com-58_medium.com	3	0.0-0.3143366583001126-0.0-0.0-0.0-0.0-0.33123543936388866-0.0-0.0-0.0-0.0-0.0-0.0-0.0-0.0-0.0-0.0-0.0-0.0-0.0-0.35442790233599863
gpt2	ensemble	Sentence Sim	fastcompany	20.8449	5	78_www.wired.com-91_www.entrepreneur.com-58_medium.com	3	0.0-0.31662626227579027-0.0-0.0-0.0-0.0-0.37769609748958494-0.0-0.0-0.0-0.0-0.0-0.0-0.0-0.0-0.0-0.0-0.0-0.0-0.0-0.30567764023462474
gpt2	average	Sentence Sim	fastcompany	20.8449	5	78_www.wired.com-91_www.entrepreneur.com-58_medium.com	3	0.0-0.31662626227579027-0.0-0.0-0.0-0.0-0.37769609748958494-0.0-0.0-0.0-0.0-0.0-0.0-0.0-0.0-0.0-0.0-0.0-0.0-0.0-0.30567764023462474
gpt2	ensemble	TF-IDF	fastcompany	20.9265	5	78_www.wired.com-91_www.entrepreneur.com-85_www.pcworld.com-58_medium.com	4	0.0-0.24397924866594653-0.0-0.0-0.0-0.0-0.25709560591682123-0.0-0.0-0.0-0.0-0.0-0.0-0.0-0.2238282038584009-0.0-0.0-0.0-0.0-0.0-0.27509694155883135
gpt2	average	TF-IDF	fastcompany	21.2686	5	78_www.wired.com-91_www.entrepreneur.com-85_www.pcworld.com-58_medium.com	4	0.0-0.24397924866594653-0.0-0.0-0.0-0.0-0.25709560591682123-0.0-0.0-0.0-0.0-0.0-0.0-0.0-0.2238282038584009-0.0-0.0-0.0-0.0-0.0-0.27509694155883135
gpt2	ensemble	Sentence Sim	fastcompany	20.9265	5	78_www.wired.com-91_www.entrepreneur.com-85_www.pcworld.com-58_medium.com	4	0.0-0.24647142035094236-0.0-0.0-0.0-0.0-0.29401001970007434-0.0-0.0-0.0-0.0-0.0-0.0-0.0-0.22156987680238951-0.0-0.0-0.0-0.0-0.0-0.23794868314659381
gpt2	average	Sentence Sim	fastcompany	21.2793	5	78_www.wired.com-91_www.entrepreneur.com-85_www.pcworld.com-58_medium.com	4	0.0-0.24647142035094236-0.0-0.0-0.0-0.0-0.29401001970007434-0.0-0.0-0.0-0.0-0.0-0.0-0.0-0.22156987680238951-0.0-0.0-0.0-0.0-0.0-0.23794868314659381
gpt2	ensemble	Prior	fastcompany	24.6574	5	45_www.npr.org-70_www.insiderpages.com-22_forums.macrumors.com-39_www.booking.com	4	0.0-0.0-0.0-0.21772617542246236-0.0-0.0-0.0-0.0-0.2889987354868376-0.0-0.0-0.21255316703069319-0.0-0.0-0.0-0.0-0.0-0.2807219220600069-0.0-0.0-0.0
gpt2	average	Prior	fastcompany	24.9659	5	45_www.npr.org-70_www.insiderpages.com-22_forums.macrumors.com-39_www.booking.com	4	0.0-0.0-0.0-0.21772617542246236-0.0-0.0-0.0-0.0-0.2889987354868376-0.0-0.0-0.21255316703069319-0.0-0.0-0.0-0.0-0.0-0.2807219220600069-0.0-0.0-0.0
gpt2	ensemble	Entropy	fastcompany	21.1318	5	15_www.dailymail.co.uk-91_www.entrepreneur.com-85_www.pcworld.com-58_medium.com	4	0.24992243251628918-0.0-0.0-0.0-0.0-0.0-0.24981900920467473-0.0-0.0-0.0-0.0-0.0-0.0-0.0-0.2504912607301686-0.0-0.0-0.0-0.0-0.0-0.2497672975488675
gpt2	average	Entropy	fastcompany	21.5729	5	15_www.dailymail.co.uk-91_www.entrepreneur.com-85_www.pcworld.com-58_medium.com	4	0.24992243251628918-0.0-0.0-0.0-0.0-0.0-0.24981900920467473-0.0-0.0-0.0-0.0-0.0-0.0-0.0-0.2504912607301686-0.0-0.0-0.0-0.0-0.0-0.2497672975488675
gpt2	ensemble	TF-IDF	fastcompany	21.0495	5	78_www.wired.com-17_www.express.co.uk-91_www.entrepreneur.com-10_www.eventbrite.com-85_www.pcworld.com-58_medium.com	6	0.0-0.17370889403843612-0.1535854758025729-0.0-0.0-0.0-0.18304750756528596-0.0-0.0-0.0-0.1344322757551578-0.0-0.0-0.0-0.15936170784789888-0.0-0.0-0.0-0.0-0.0-0.19586413899064828
gpt2	average	TF-IDF	fastcompany	21.54	5	78_www.wired.com-17_www.express.co.uk-91_www.entrepreneur.com-10_www.eventbrite.com-85_www.pcworld.com-58_medium.com	6	0.0-0.17370889403843612-0.1535854758025729-0.0-0.0-0.0-0.18304750756528596-0.0-0.0-0.0-0.1344322757551578-0.0-0.0-0.0-0.15936170784789888-0.0-0.0-0.0-0.0-0.0-0.19586413899064828
gpt2	ensemble	Sentence Sim	fastcompany	21.1732	5	78_www.wired.com-91_www.entrepreneur.com-10_www.eventbrite.com-84_www.glassdoor.com-85_www.pcworld.com-58_medium.com	6	0.0-0.17302570793299546-0.0-0.0-0.0-0.0-0.20639833910789893-0.0-0.0-0.0-0.15167414508037352-0.0-0.0-0.14631461285906625-0.15554454441725077-0.0-0.0-0.0-0.0-0.0-0.167042650602415
gpt2	average	Sentence Sim	fastcompany	21.7334	5	78_www.wired.com-91_www.entrepreneur.com-10_www.eventbrite.com-84_www.glassdoor.com-85_www.pcworld.com-58_medium.com	6	0.0-0.17302570793299546-0.0-0.0-0.0-0.0-0.20639833910789893-0.0-0.0-0.0-0.15167414508037352-0.0-0.0-0.14631461285906625-0.15554454441725077-0.0-0.0-0.0-0.0-0.0-0.167042650602415
gpt2	ensemble	Prior	fastcompany	24.2278	5	45_www.npr.org-81_www.librarything.com-70_www.insiderpages.com-22_forums.macrumors.com-84_www.glassdoor.com-39_www.booking.com	6	0.0-0.0-0.0-0.15624484408513448-0.13520871143375682-0.0-0.0-0.0-0.20739151955122917-0.0-0.0-0.15253258538195016-0.0-0.14717043392179507-0.0-0.0-0.0-0.2014519056261343-0.0-0.0-0.0
gpt2	average	Prior	fastcompany	24.5879	5	45_www.npr.org-81_www.librarything.com-70_www.insiderpages.com-22_forums.macrumors.com-84_www.glassdoor.com-39_www.booking.com	6	0.0-0.0-0.0-0.15624484408513448-0.13520871143375682-0.0-0.0-0.0-0.20739151955122917-0.0-0.0-0.15253258538195016-0.0-0.14717043392179507-0.0-0.0-0.0-0.2014519056261343-0.0-0.0-0.0
gpt2	ensemble	Entropy	fastcompany	21.1318	5	15_www.dailymail.co.uk-78_www.wired.com-91_www.entrepreneur.com-85_www.pcworld.com-60_www.csmonitor.com-58_medium.com	6	0.16670451026937763-0.16656001651357208-0.0-0.0-0.0-0.0-0.16666322633914749-0.0-0.0-0.0-0.0-0.0-0.0-0.0-0.1669315718856435-0.16649809061822685-0.0-0.0-0.0-0.0-0.1666425843740324
gpt2	average	Entropy	fastcompany	21.6083	5	15_www.dailymail.co.uk-78_www.wired.com-91_www.entrepreneur.com-85_www.pcworld.com-60_www.csmonitor.com-58_medium.com	6	0.16670451026937763-0.16656001651357208-0.0-0.0-0.0-0.0-0.16666322633914749-0.0-0.0-0.0-0.0-0.0-0.0-0.0-0.1669315718856435-0.16649809061822685-0.0-0.0-0.0-0.0-0.1666425843740324
gpt2-large	average	TF-IDF	fastcompany	14.7628	10	78_www.wired.com-17_www.express.co.uk-91_www.entrepreneur.com-85_www.pcworld.com-58_medium.com	5	0.0-0.1970730305140025-0.1759862598725023-0.0-0.0-0.0-0.21105421737224278-0.0-0.0-0.0-0.0-0.0-0.0-0.0-0.1803742626174565-0.0-0.0-0.0-0.0-0.0-0.23551222962379592
gpt2-large	ensemble	TF-IDF	fastcompany	14.4107	10	78_www.wired.com-17_www.express.co.uk-91_www.entrepreneur.com-85_www.pcworld.com-58_medium.com	5	0.0-0.1970730305140025-0.1759862598725023-0.0-0.0-0.0-0.21105421737224278-0.0-0.0-0.0-0.0-0.0-0.0-0.0-0.1803742626174565-0.0-0.0-0.0-0.0-0.0-0.23551222962379592
gpt2-large	average	Sentence Sim	fastcompany	14.9595	10	78_www.wired.com-91_www.entrepreneur.com-10_www.eventbrite.com-84_www.glassdoor.com-58_medium.com	5	0.0-0.19891644278697918-0.0-0.0-0.0-0.0-0.23410618166259525-0.0-0.0-0.0-0.20586083590530133-0.0-0.0-0.16576638389714451-0.0-0.0-0.0-0.0-0.0-0.0-0.19535015574797976
gpt2-large	ensemble	Sentence Sim	fastcompany	14.4954	10	78_www.wired.com-91_www.entrepreneur.com-10_www.eventbrite.com-84_www.glassdoor.com-58_medium.com	5	0.0-0.19891644278697918-0.0-0.0-0.0-0.0-0.23410618166259525-0.0-0.0-0.0-0.20586083590530133-0.0-0.0-0.16576638389714451-0.0-0.0-0.0-0.0-0.0-0.0-0.19535015574797976
gpt2-large	average	Prior	fastcompany	16.2015	10	37_www.instructables.com-70_www.insiderpages.com-22_forums.macrumors.com-39_www.booking.com-www.frontiersin.org	5	0.0-0.0-0.0-0.0-0.0-0.17766597612705928-0.0-0.0-0.1940416296734734-0.0-0.0-0.17806057018841867-0.0-0.0-0.0-0.0-0.0-0.2744401696754464-0.0-0.17579165433560226-0.0
gpt2-large	ensemble	Prior	fastcompany	15.92	10	37_www.instructables.com-70_www.insiderpages.com-22_forums.macrumors.com-39_www.booking.com-www.frontiersin.org	5	0.0-0.0-0.0-0.0-0.0-0.17766597612705928-0.0-0.0-0.1940416296734734-0.0-0.0-0.17806057018841867-0.0-0.0-0.0-0.0-0.0-0.2744401696754464-0.0-0.17579165433560226-0.0
gpt2	ensemble	TF-IDF	fastcompany	21.1318	5	78_www.wired.com-17_www.express.co.uk-91_www.entrepreneur.com-100_www.ign.com-10_www.eventbrite.com-85_www.pcworld.com-58_medium.com	7	0.0-0.15477252442233616-0.13684280206924884-0.0-0.0-0.0-0.16309311616955732-0.0-0.0-0.10901209014611518-0.11977753239198913-0.0-0.0-0.0-0.14198935498614487-0.0-0.0-0.0-0.0-0.0-0.17451257981460852
gpt2	average	TF-IDF	fastcompany	21.6344	5	78_www.wired.com-17_www.express.co.uk-91_www.entrepreneur.com-100_www.ign.com-10_www.eventbrite.com-85_www.pcworld.com-58_medium.com	7	0.0-0.15477252442233616-0.13684280206924884-0.0-0.0-0.0-0.16309311616955732-0.0-0.0-0.10901209014611518-0.11977753239198913-0.0-0.0-0.0-0.14198935498614487-0.0-0.0-0.0-0.0-0.0-0.17451257981460852
gpt2	ensemble	Sentence Sim	fastcompany	21.256	5	78_www.wired.com-45_www.npr.org-91_www.entrepreneur.com-10_www.eventbrite.com-84_www.glassdoor.com-85_www.pcworld.com-58_medium.com	7	0.0-0.15104457719933162-0.0-0.12703968095987253-0.0-0.0-0.18017755995698387-0.0-0.0-0.0-0.13240551007950147-0.0-0.0-0.12772685112168322-0.1357842151194345-0.0-0.0-0.0-0.0-0.0-0.14582160556319274
gpt2	average	Sentence Sim	fastcompany	21.8868	5	78_www.wired.com-45_www.npr.org-91_www.entrepreneur.com-10_www.eventbrite.com-84_www.glassdoor.com-85_www.pcworld.com-58_medium.com	7	0.0-0.15104457719933162-0.0-0.12703968095987253-0.0-0.0-0.18017755995698387-0.0-0.0-0.0-0.13240551007950147-0.0-0.0-0.12772685112168322-0.1357842151194345-0.0-0.0-0.0-0.0-0.0-0.14582160556319274
gpt2	ensemble	Prior	fastcompany	24.0862	5	45_www.npr.org-81_www.librarything.com-37_www.instructables.com-70_www.insiderpages.com-22_forums.macrumors.com-84_www.glassdoor.com-39_www.booking.com	7	0.0-0.0-0.0-0.13876474466993918-0.12008205729357461-0.11187632793611253-0.0-0.0-0.18418931789874715-0.0-0.0-0.13546779983881604-0.0-0.13070554619386035-0.0-0.0-0.0-0.1789142061689501-0.0-0.0-0.0
gpt2	average	Prior	fastcompany	24.49	5	45_www.npr.org-81_www.librarything.com-37_www.instructables.com-70_www.insiderpages.com-22_forums.macrumors.com-84_www.glassdoor.com-39_www.booking.com	7	0.0-0.0-0.0-0.13876474466993918-0.12008205729357461-0.11187632793611253-0.0-0.0-0.18418931789874715-0.0-0.0-0.13546779983881604-0.0-0.13070554619386035-0.0-0.0-0.0-0.1789142061689501-0.0-0.0-0.0
gpt2	ensemble	Entropy	fastcompany	21.256	5	15_www.dailymail.co.uk-78_www.wired.com-17_www.express.co.uk-91_www.entrepreneur.com-85_www.pcworld.com-60_www.csmonitor.com-58_medium.com	7	0.14291394239264887-0.14281086175413796-0.1426783295046239-0.0-0.0-0.0-0.14288449078164575-0.0-0.0-0.0-0.0-0.0-0.0-0.0-0.14307592625316604-0.14276668433763326-0.0-0.0-0.0-0.0-0.1428697649761442
gpt2	average	Entropy	fastcompany	21.7765	5	15_www.dailymail.co.uk-78_www.wired.com-17_www.express.co.uk-91_www.entrepreneur.com-85_www.pcworld.com-60_www.csmonitor.com-58_medium.com	7	0.14291394239264887-0.14281086175413796-0.1426783295046239-0.0-0.0-0.0-0.14288449078164575-0.0-0.0-0.0-0.0-0.0-0.0-0.0-0.14307592625316604-0.14276668433763326-0.0-0.0-0.0-0.0-0.1428697649761442
gpt2-large	average	Entropy	fastcompany	15.0294	42	78_www.wired.com-17_www.express.co.uk-91_www.entrepreneur.com-100_www.ign.com-85_www.pcworld.com	5	0.0-0.19977392614920875-0.19973624717407687-0.0-0.0-0.0-0.20018839487565937-0.0-0.0-0.19973624717407687-0.0-0.0-0.0-0.0-0.20056518462697814-0.0-0.0-0.0-0.0-0.0-0.0
gpt2-large	ensemble	Entropy	fastcompany	14.609	42	78_www.wired.com-17_www.express.co.uk-91_www.entrepreneur.com-100_www.ign.com-85_www.pcworld.com	5	0.0-0.19977392614920875-0.19973624717407687-0.0-0.0-0.0-0.20018839487565937-0.0-0.0-0.19973624717407687-0.0-0.0-0.0-0.0-0.20056518462697814-0.0-0.0-0.0-0.0-0.0-0.0
gpt2	ensemble	TF-IDF	fastcompany	21.1732	5	15_www.dailymail.co.uk-78_www.wired.com-17_www.express.co.uk-91_www.entrepreneur.com-100_www.ign.com-10_www.eventbrite.com-85_www.pcworld.com-58_medium.com	8	0.09553627766705175-0.13998613355389333-0.1237693501340237-0.0-0.0-0.0-0.14751180693759777-0.0-0.0-0.09859748083285026-0.10833443279911378-0.0-0.0-0.0-0.12842422054242297-0.0-0.0-0.0-0.0-0.0-0.15784029753304657
gpt2	average	TF-IDF	fastcompany	21.7064	5	15_www.dailymail.co.uk-78_www.wired.com-17_www.express.co.uk-91_www.entrepreneur.com-100_www.ign.com-10_www.eventbrite.com-85_www.pcworld.com-58_medium.com	8	0.09553627766705175-0.13998613355389333-0.1237693501340237-0.0-0.0-0.0-0.14751180693759777-0.0-0.0-0.09859748083285026-0.10833443279911378-0.0-0.0-0.0-0.12842422054242297-0.0-0.0-0.0-0.0-0.0-0.15784029753304657
gpt2	ensemble	Sentence Sim	fastcompany	21.3392	5	78_www.wired.com-45_www.npr.org-91_www.entrepreneur.com-10_www.eventbrite.com-77_www.androidheadlines.com-84_www.glassdoor.com-85_www.pcworld.com-58_medium.com	8	0.0-0.1348808145438892-0.0-0.11344475892471326-0.0-0.0-0.16089618376339798-0.0-0.0-0.0-0.118236373531332-0.0-0.10701319408581828-0.11405839281262811-0.12125351255306796-0.0-0.0-0.0-0.0-0.0-0.13021676978515315
gpt2	average	Sentence Sim	fastcompany	22.0157	5	78_www.wired.com-45_www.npr.org-91_www.entrepreneur.com-10_www.eventbrite.com-77_www.androidheadlines.com-84_www.glassdoor.com-85_www.pcworld.com-58_medium.com	8	0.0-0.1348808145438892-0.0-0.11344475892471326-0.0-0.0-0.16089618376339798-0.0-0.0-0.0-0.118236373531332-0.0-0.10701319408581828-0.11405839281262811-0.12125351255306796-0.0-0.0-0.0-0.0-0.0-0.13021676978515315
gpt2	ensemble	Prior	fastcompany	23.7128	5	45_www.npr.org-81_www.librarything.com-37_www.instructables.com-70_www.insiderpages.com-22_forums.macrumors.com-84_www.glassdoor.com-39_www.booking.com-www.frontiersin.org	8	0.0-0.0-0.0-0.12500825028050955-0.1081776780410534-0.10078542670450795-0.0-0.0-0.16592964160781468-0.0-0.0-0.1220381492970761-0.0-0.1177480034321167-0.0-0.0-0.0-0.16117748003432117-0.0-0.09913537060260048-0.0
gpt2	average	Prior	fastcompany	24.3094	5	45_www.npr.org-81_www.librarything.com-37_www.instructables.com-70_www.insiderpages.com-22_forums.macrumors.com-84_www.glassdoor.com-39_www.booking.com-www.frontiersin.org	8	0.0-0.0-0.0-0.12500825028050955-0.1081776780410534-0.10078542670450795-0.0-0.0-0.16592964160781468-0.0-0.0-0.1220381492970761-0.0-0.1177480034321167-0.0-0.0-0.0-0.16117748003432117-0.0-0.09913537060260048-0.0
gpt2	ensemble	Entropy	fastcompany	21.3392	5	15_www.dailymail.co.uk-78_www.wired.com-17_www.express.co.uk-45_www.npr.org-91_www.entrepreneur.com-85_www.pcworld.com-60_www.csmonitor.com-58_medium.com	8	0.12506480470344264-0.12498759058870247-0.12488831529832224-0.12484419294704215-0.0-0.0-0.1250427435278026-0.0-0.0-0.0-0.0-0.0-0.0-0.0-0.12518614116946292-0.1249544988252424-0.0-0.0-0.0-0.0-0.12503171293998258
gpt2	average	Entropy	fastcompany	21.892	5	15_www.dailymail.co.uk-78_www.wired.com-17_www.express.co.uk-45_www.npr.org-91_www.entrepreneur.com-85_www.pcworld.com-60_www.csmonitor.com-58_medium.com	8	0.12506480470344264-0.12498759058870247-0.12488831529832224-0.12484419294704215-0.0-0.0-0.1250427435278026-0.0-0.0-0.0-0.0-0.0-0.0-0.0-0.12518614116946292-0.1249544988252424-0.0-0.0-0.0-0.0-0.12503171293998258
gpt2-large	average	Entropy	fastcompany	15.0294	10	78_www.wired.com-17_www.express.co.uk-91_www.entrepreneur.com-100_www.ign.com-85_www.pcworld.com	5	0.0-0.19977392614920875-0.19973624717407687-0.0-0.0-0.0-0.20018839487565937-0.0-0.0-0.19973624717407687-0.0-0.0-0.0-0.0-0.20056518462697814-0.0-0.0-0.0-0.0-0.0-0.0
gpt2-large	ensemble	Entropy	fastcompany	14.609	10	78_www.wired.com-17_www.express.co.uk-91_www.entrepreneur.com-100_www.ign.com-85_www.pcworld.com	5	0.0-0.19977392614920875-0.19973624717407687-0.0-0.0-0.0-0.20018839487565937-0.0-0.0-0.19973624717407687-0.0-0.0-0.0-0.0-0.20056518462697814-0.0-0.0-0.0-0.0-0.0-0.0
gpt2	ensemble	TF-IDF	fastcompany	21.256	5	15_www.dailymail.co.uk-78_www.wired.com-17_www.express.co.uk-91_www.entrepreneur.com-100_www.ign.com-10_www.eventbrite.com-85_www.pcworld.com-99_www.lonelyplanet.com-58_medium.com	9	0.08726019853942034-0.12785946977387092-0.11304750749687893-0.0-0.0-0.0-0.13473321208036398-0.0-0.0-0.0900562170000517-0.0989496801168168-0.0-0.0-0.0-0.11729913762033596-0.0-0.08662760712191352-0.0-0.0-0.0-0.14416697025034786
gpt2	average	TF-IDF	fastcompany	21.8065	5	15_www.dailymail.co.uk-78_www.wired.com-17_www.express.co.uk-91_www.entrepreneur.com-100_www.ign.com-10_www.eventbrite.com-85_www.pcworld.com-99_www.lonelyplanet.com-58_medium.com	9	0.08726019853942034-0.12785946977387092-0.11304750749687893-0.0-0.0-0.0-0.13473321208036398-0.0-0.0-0.0900562170000517-0.0989496801168168-0.0-0.0-0.0-0.11729913762033596-0.0-0.08662760712191352-0.0-0.0-0.0-0.14416697025034786
gpt2	ensemble	Sentence Sim	fastcompany	21.3809	5	78_www.wired.com-45_www.npr.org-91_www.entrepreneur.com-10_www.eventbrite.com-77_www.androidheadlines.com-84_www.glassdoor.com-85_www.pcworld.com-60_www.csmonitor.com-58_medium.com	9	0.0-0.1220153547640649-0.0-0.10262395399323913-0.0-0.0-0.1455492762885647-0.0-0.0-0.0-0.10695852565264308-0.0-0.09680585697062288-0.10317905708023022-0.10968787815065774-0.09538391225861112-0.0-0.0-0.0-0.0-0.11779618484136636
gpt2	average	Sentence Sim	fastcompany	22.039	5	78_www.wired.com-45_www.npr.org-91_www.entrepreneur.com-10_www.eventbrite.com-77_www.androidheadlines.com-84_www.glassdoor.com-85_www.pcworld.com-60_www.csmonitor.com-58_medium.com	9	0.0-0.1220153547640649-0.0-0.10262395399323913-0.0-0.0-0.1455492762885647-0.0-0.0-0.0-0.10695852565264308-0.0-0.09680585697062288-0.10317905708023022-0.10968787815065774-0.09538391225861112-0.0-0.0-0.0-0.0-0.11779618484136636
gpt2	ensemble	Prior	fastcompany	23.6204	5	45_www.npr.org-81_www.librarything.com-37_www.instructables.com-70_www.insiderpages.com-22_forums.macrumors.com-84_www.glassdoor.com-99_www.lonelyplanet.com-39_www.booking.com-www.frontiersin.org	9	0.0-0.0-0.0-0.11376058622139468-0.0984443510120728-0.09171722025346868-0.0-0.0-0.15100006006366748-0.0-0.0-0.11105772118445552-0.0-0.10715358279776563-0.0-0.0-0.0899753738963301-0.14667547600456485-0.0-0.09021562856628025-0.0
gpt2	average	Prior	fastcompany	24.212	5	45_www.npr.org-81_www.librarything.com-37_www.instructables.com-70_www.insiderpages.com-22_forums.macrumors.com-84_www.glassdoor.com-99_www.lonelyplanet.com-39_www.booking.com-www.frontiersin.org	9	0.0-0.0-0.0-0.11376058622139468-0.0984443510120728-0.09171722025346868-0.0-0.0-0.15100006006366748-0.0-0.0-0.11105772118445552-0.0-0.10715358279776563-0.0-0.0-0.0899753738963301-0.14667547600456485-0.0-0.09021562856628025-0.0
gpt2	ensemble	Entropy	fastcompany	21.4227	5	15_www.dailymail.co.uk-78_www.wired.com-17_www.express.co.uk-45_www.npr.org-91_www.entrepreneur.com-77_www.androidheadlines.com-85_www.pcworld.com-60_www.csmonitor.com-58_medium.com	9	0.11117586561535825-0.11111587247171752-0.11103873842989373-0.11100445663352759-0.0-0.0-0.11115872471717518-0.0-0.0-0.0-0.0-0.0-0.11099588618443607-0.0-0.1112701405553651-0.11109016112444292-0.0-0.0-0.0-0.0-0.11115015426808365
gpt2	average	Entropy	fastcompany	21.9884	5	15_www.dailymail.co.uk-78_www.wired.com-17_www.express.co.uk-45_www.npr.org-91_www.entrepreneur.com-77_www.androidheadlines.com-85_www.pcworld.com-60_www.csmonitor.com-58_medium.com	9	0.11117586561535825-0.11111587247171752-0.11103873842989373-0.11100445663352759-0.0-0.0-0.11115872471717518-0.0-0.0-0.0-0.0-0.0-0.11099588618443607-0.0-0.1112701405553651-0.11109016112444292-0.0-0.0-0.0-0.0-0.11115015426808365
gpt2-large	average	TF-IDF	fastcompany	14.7681	88	78_www.wired.com-17_www.express.co.uk-91_www.entrepreneur.com-85_www.pcworld.com-58_medium.com	5	0.0-0.20081085403348325-0.1753869114029876-0.0-0.0-0.0-0.20274407575053388-0.0-0.0-0.0-0.0-0.0-0.0-0.0-0.19582966042957115-0.0-0.0-0.0-0.0-0.0-0.22522849838342412
gpt2-large	ensemble	TF-IDF	fastcompany	14.4107	88	78_www.wired.com-17_www.express.co.uk-91_www.entrepreneur.com-85_www.pcworld.com-58_medium.com	5	0.0-0.20081085403348325-0.1753869114029876-0.0-0.0-0.0-0.20274407575053388-0.0-0.0-0.0-0.0-0.0-0.0-0.0-0.19582966042957115-0.0-0.0-0.0-0.0-0.0-0.22522849838342412
gpt2-large	average	Sentence Sim	fastcompany	14.7814	88	78_www.wired.com-91_www.entrepreneur.com-10_www.eventbrite.com-85_www.pcworld.com-58_medium.com	5	0.0-0.19293492061472747-0.0-0.0-0.0-0.0-0.2262401778891533-0.0-0.0-0.0-0.2032906190396047-0.0-0.0-0.0-0.17627670172730142-0.0-0.0-0.0-0.0-0.0-0.20125758072921324
gpt2-large	ensemble	Sentence Sim	fastcompany	14.4107	88	78_www.wired.com-91_www.entrepreneur.com-10_www.eventbrite.com-85_www.pcworld.com-58_medium.com	5	0.0-0.19293492061472747-0.0-0.0-0.0-0.0-0.2262401778891533-0.0-0.0-0.0-0.2032906190396047-0.0-0.0-0.0-0.17627670172730142-0.0-0.0-0.0-0.0-0.0-0.20125758072921324
gpt2-large	average	Prior	fastcompany	16.2015	88	37_www.instructables.com-70_www.insiderpages.com-22_forums.macrumors.com-39_www.booking.com-www.frontiersin.org	5	0.0-0.0-0.0-0.0-0.0-0.17766597612705928-0.0-0.0-0.1940416296734734-0.0-0.0-0.17806057018841867-0.0-0.0-0.0-0.0-0.0-0.2744401696754464-0.0-0.17579165433560226-0.0
gpt2-large	ensemble	Prior	fastcompany	15.92	88	37_www.instructables.com-70_www.insiderpages.com-22_forums.macrumors.com-39_www.booking.com-www.frontiersin.org	5	0.0-0.0-0.0-0.0-0.0-0.17766597612705928-0.0-0.0-0.1940416296734734-0.0-0.0-0.17806057018841867-0.0-0.0-0.0-0.0-0.0-0.2744401696754464-0.0-0.17579165433560226-0.0
gpt2-large	average	Entropy	fastcompany	15.0294	88	78_www.wired.com-17_www.express.co.uk-91_www.entrepreneur.com-100_www.ign.com-85_www.pcworld.com	5	0.0-0.19977392614920875-0.19973624717407687-0.0-0.0-0.0-0.20018839487565937-0.0-0.0-0.19973624717407687-0.0-0.0-0.0-0.0-0.20056518462697814-0.0-0.0-0.0-0.0-0.0-0.0
gpt2-large	ensemble	Entropy	fastcompany	14.609	88	78_www.wired.com-17_www.express.co.uk-91_www.entrepreneur.com-100_www.ign.com-85_www.pcworld.com	5	0.0-0.19977392614920875-0.19973624717407687-0.0-0.0-0.0-0.20018839487565937-0.0-0.0-0.19973624717407687-0.0-0.0-0.0-0.0-0.20056518462697814-0.0-0.0-0.0-0.0-0.0-0.0
gpt2	ensemble	Prior	fastcompany	25.0947	5	45_www.npr.org-70_www.insiderpages.com-39_www.booking.com	3	0.0-0.0-0.0-0.2764963503649635-0.0-0.0-0.0-0.0-0.367007299270073-0.0-0.0-0.0-0.0-0.0-0.0-0.0-0.0-0.3564963503649635-0.0-0.0-0.0
gpt2	average	Prior	fastcompany	25.2288	5	45_www.npr.org-70_www.insiderpages.com-39_www.booking.com	3	0.0-0.0-0.0-0.2764963503649635-0.0-0.0-0.0-0.0-0.367007299270073-0.0-0.0-0.0-0.0-0.0-0.0-0.0-0.0-0.3564963503649635-0.0-0.0-0.0
gpt2	ensemble	Entropy	fastcompany	21.4227	5	15_www.dailymail.co.uk-91_www.entrepreneur.com-85_www.pcworld.com	3	0.33302277432712213-0.0-0.0-0.0-0.0-0.0-0.33281573498964806-0.0-0.0-0.0-0.0-0.0-0.0-0.0-0.3341614906832298-0.0-0.0-0.0-0.0-0.0-0.0
gpt2	average	Entropy	fastcompany	21.8398	5	15_www.dailymail.co.uk-91_www.entrepreneur.com-85_www.pcworld.com	3	0.33302277432712213-0.0-0.0-0.0-0.0-0.0-0.33281573498964806-0.0-0.0-0.0-0.0-0.0-0.0-0.0-0.3341614906832298-0.0-0.0-0.0-0.0-0.0-0.0
gpt2	ensemble	TF-IDF	fastcompany	21.3392	5	15_www.dailymail.co.uk-78_www.wired.com-17_www.express.co.uk-81_www.librarything.com-91_www.entrepreneur.com-100_www.ign.com-10_www.eventbrite.com-85_www.pcworld.com-99_www.lonelyplanet.com-58_medium.com	10	0.08043510731591128-0.11785889036191893-0.1042054516206484-0.0-0.07821539874706794-0.0-0.12419500017302505-0.0-0.0-0.08301243407774019-0.09121029143058516-0.0-0.0-0.0-0.10812453879867419-0.0-0.07985199428836871-0.0-0.0-0.0-0.13289089318606023
gpt2	average	TF-IDF	fastcompany	21.9151	5	15_www.dailymail.co.uk-78_www.wired.com-17_www.express.co.uk-81_www.librarything.com-91_www.entrepreneur.com-100_www.ign.com-10_www.eventbrite.com-85_www.pcworld.com-99_www.lonelyplanet.com-58_medium.com	10	0.08043510731591128-0.11785889036191893-0.1042054516206484-0.0-0.07821539874706794-0.0-0.12419500017302505-0.0-0.0-0.08301243407774019-0.09121029143058516-0.0-0.0-0.0-0.10812453879867419-0.0-0.07985199428836871-0.0-0.0-0.0-0.13289089318606023
gpt2	ensemble	Sentence Sim	fastcompany	21.3809	5	15_www.dailymail.co.uk-78_www.wired.com-45_www.npr.org-91_www.entrepreneur.com-10_www.eventbrite.com-77_www.androidheadlines.com-84_www.glassdoor.com-85_www.pcworld.com-60_www.csmonitor.com-58_medium.com	10	0.06889337935552674-0.113609304641105-0.0-0.09555384299981878-0.0-0.0-0.13552189478229423-0.0-0.0-0.0-0.0995897913695477-0.0-0.0901365743425089-0.09607070315925637-0.10213110955052168-0.08881259220696436-0.0-0.0-0.0-0.0-0.10968080759245637
gpt2	average	Sentence Sim	fastcompany	22.0497	5	15_www.dailymail.co.uk-78_www.wired.com-45_www.npr.org-91_www.entrepreneur.com-10_www.eventbrite.com-77_www.androidheadlines.com-84_www.glassdoor.com-85_www.pcworld.com-60_www.csmonitor.com-58_medium.com	10	0.06889337935552674-0.113609304641105-0.0-0.09555384299981878-0.0-0.0-0.13552189478229423-0.0-0.0-0.0-0.0995897913695477-0.0-0.0901365743425089-0.09607070315925637-0.10213110955052168-0.08881259220696436-0.0-0.0-0.0-0.0-0.10968080759245637
gpt2	ensemble	Prior	fastcompany	23.4824	5	45_www.npr.org-81_www.librarything.com-37_www.instructables.com-70_www.insiderpages.com-22_forums.macrumors.com-77_www.androidheadlines.com-84_www.glassdoor.com-99_www.lonelyplanet.com-39_www.booking.com-www.frontiersin.org	10	0.0-0.0-0.0-0.10437561997134355-0.09032293618428304-0.08415077703075058-0.0-0.0-0.13854292957125539-0.0-0.0-0.1018957345971564-0.08249752011462581-0.09831367794555274-0.0-0.0-0.08255262867849664-0.13457511297255592-0.0-0.08277306293397994-0.0
gpt2	average	Prior	fastcompany	24.1097	5	45_www.npr.org-81_www.librarything.com-37_www.instructables.com-70_www.insiderpages.com-22_forums.macrumors.com-77_www.androidheadlines.com-84_www.glassdoor.com-99_www.lonelyplanet.com-39_www.booking.com-www.frontiersin.org	10	0.0-0.0-0.0-0.10437561997134355-0.09032293618428304-0.08415077703075058-0.0-0.0-0.13854292957125539-0.0-0.0-0.1018957345971564-0.08249752011462581-0.09831367794555274-0.0-0.0-0.08255262867849664-0.13457511297255592-0.0-0.08277306293397994-0.0
gpt2-large	average	Entropy	fastcompany	15.0294	5	78_www.wired.com-17_www.express.co.uk-91_www.entrepreneur.com-100_www.ign.com-85_www.pcworld.com	5	0.0-0.19977392614920875-0.19973624717407687-0.0-0.0-0.0-0.20018839487565937-0.0-0.0-0.19973624717407687-0.0-0.0-0.0-0.0-0.20056518462697814-0.0-0.0-0.0-0.0-0.0-0.0
gpt2-large	ensemble	Entropy	fastcompany	14.609	5	78_www.wired.com-17_www.express.co.uk-91_www.entrepreneur.com-100_www.ign.com-85_www.pcworld.com	5	0.0-0.19977392614920875-0.19973624717407687-0.0-0.0-0.0-0.20018839487565937-0.0-0.0-0.19973624717407687-0.0-0.0-0.0-0.0-0.20056518462697814-0.0-0.0-0.0-0.0-0.0-0.0
gpt2-large	average	TF-IDF	fastcompany	14.7676	5	78_www.wired.com-17_www.express.co.uk-91_www.entrepreneur.com-85_www.pcworld.com-58_medium.com	5	0.0-0.20068781352722814-0.1774390050606004-0.0-0.0-0.0-0.21147681739748825-0.0-0.0-0.0-0.0-0.0-0.0-0.0-0.184112350061265-0.0-0.0-0.0-0.0-0.0-0.22628401395341818
gpt2-large	ensemble	TF-IDF	fastcompany	14.4107	5	78_www.wired.com-17_www.express.co.uk-91_www.entrepreneur.com-85_www.pcworld.com-58_medium.com	5	0.0-0.20068781352722814-0.1774390050606004-0.0-0.0-0.0-0.21147681739748825-0.0-0.0-0.0-0.0-0.0-0.0-0.0-0.184112350061265-0.0-0.0-0.0-0.0-0.0-0.22628401395341818
gpt2-large	average	Sentence Sim	fastcompany	14.7699	5	78_www.wired.com-91_www.entrepreneur.com-10_www.eventbrite.com-85_www.pcworld.com-58_medium.com	5	0.0-0.20268088283960622-0.0-0.0-0.0-0.0-0.24177330690776475-0.0-0.0-0.0-0.17766983875446596-0.0-0.0-0.0-0.1822035925180621-0.0-0.0-0.0-0.0-0.0-0.19567237898010098
gpt2-large	ensemble	Sentence Sim	fastcompany	14.3825	5	78_www.wired.com-91_www.entrepreneur.com-10_www.eventbrite.com-85_www.pcworld.com-58_medium.com	5	0.0-0.20268088283960622-0.0-0.0-0.0-0.0-0.24177330690776475-0.0-0.0-0.0-0.17766983875446596-0.0-0.0-0.0-0.1822035925180621-0.0-0.0-0.0-0.0-0.0-0.19567237898010098
gpt2	ensemble	Sentence Sim-topk-uniform	fastcompany	21.0084	5	78_www.wired.com-91_www.entrepreneur.com-10_www.eventbrite.com-85_www.pcworld.com-58_medium.com	5	0.0-0.2-0.0-0.0-0.0-0.0-0.2-0.0-0.0-0.0-0.2-0.0-0.0-0.0-0.2-0.0-0.0-0.0-0.0-0.0-0.2
gpt2	average	Sentence Sim-topk-uniform	fastcompany	21.4466	5	78_www.wired.com-91_www.entrepreneur.com-10_www.eventbrite.com-85_www.pcworld.com-58_medium.com	5	0.0-0.2-0.0-0.0-0.0-0.0-0.2-0.0-0.0-0.0-0.2-0.0-0.0-0.0-0.2-0.0-0.0-0.0-0.0-0.0-0.2
gpt2	ensemble	Sentence Sim-topk-uniform	fastcompany	21.256	10	78_www.wired.com-91_www.entrepreneur.com-10_www.eventbrite.com-84_www.glassdoor.com-58_medium.com	5	0.0-0.2-0.0-0.0-0.0-0.0-0.2-0.0-0.0-0.0-0.2-0.0-0.0-0.2-0.0-0.0-0.0-0.0-0.0-0.0-0.2
gpt2	average	Sentence Sim-topk-uniform	fastcompany	21.9345	10	78_www.wired.com-91_www.entrepreneur.com-10_www.eventbrite.com-84_www.glassdoor.com-58_medium.com	5	0.0-0.2-0.0-0.0-0.0-0.0-0.2-0.0-0.0-0.0-0.2-0.0-0.0-0.2-0.0-0.0-0.0-0.0-0.0-0.0-0.2
gpt2	ensemble	Sentence Sim-topk-uniform	fastcompany	21.256	42	78_www.wired.com-91_www.entrepreneur.com-10_www.eventbrite.com-84_www.glassdoor.com-58_medium.com	5	0.0-0.2-0.0-0.0-0.0-0.0-0.2-0.0-0.0-0.0-0.2-0.0-0.0-0.2-0.0-0.0-0.0-0.0-0.0-0.0-0.2
gpt2	average	Sentence Sim-topk-uniform	fastcompany	21.9345	42	78_www.wired.com-91_www.entrepreneur.com-10_www.eventbrite.com-84_www.glassdoor.com-58_medium.com	5	0.0-0.2-0.0-0.0-0.0-0.0-0.2-0.0-0.0-0.0-0.2-0.0-0.0-0.2-0.0-0.0-0.0-0.0-0.0-0.0-0.2
gpt2	ensemble	Sentence Sim-topk-uniform	fastcompany	21.0084	88	78_www.wired.com-91_www.entrepreneur.com-10_www.eventbrite.com-85_www.pcworld.com-58_medium.com	5	0.0-0.2-0.0-0.0-0.0-0.0-0.2-0.0-0.0-0.0-0.2-0.0-0.0-0.0-0.2-0.0-0.0-0.0-0.0-0.0-0.2
gpt2	average	Sentence Sim-topk-uniform	fastcompany	21.4466	88	78_www.wired.com-91_www.entrepreneur.com-10_www.eventbrite.com-85_www.pcworld.com-58_medium.com	5	0.0-0.2-0.0-0.0-0.0-0.0-0.2-0.0-0.0-0.0-0.2-0.0-0.0-0.0-0.2-0.0-0.0-0.0-0.0-0.0-0.2
gpt2	ensemble	tfidf-topk-uniform	fastcompany	21.0495	5	78_www.wired.com-17_www.express.co.uk-91_www.entrepreneur.com-85_www.pcworld.com-58_medium.com	5	0.0-0.2-0.2-0.0-0.0-0.0-0.2-0.0-0.0-0.0-0.0-0.0-0.0-0.0-0.2-0.0-0.0-0.0-0.0-0.0-0.2
gpt2	average	tfidf-topk-uniform	fastcompany	21.5031	5	78_www.wired.com-17_www.express.co.uk-91_www.entrepreneur.com-85_www.pcworld.com-58_medium.com	5	0.0-0.2-0.2-0.0-0.0-0.0-0.2-0.0-0.0-0.0-0.0-0.0-0.0-0.0-0.2-0.0-0.0-0.0-0.0-0.0-0.2
gpt2	ensemble	tfidf-topk-uniform	fastcompany	21.0495	10	78_www.wired.com-17_www.express.co.uk-91_www.entrepreneur.com-85_www.pcworld.com-58_medium.com	5	0.0-0.2-0.2-0.0-0.0-0.0-0.2-0.0-0.0-0.0-0.0-0.0-0.0-0.0-0.2-0.0-0.0-0.0-0.0-0.0-0.2
gpt2	average	tfidf-topk-uniform	fastcompany	21.5031	10	78_www.wired.com-17_www.express.co.uk-91_www.entrepreneur.com-85_www.pcworld.com-58_medium.com	5	0.0-0.2-0.2-0.0-0.0-0.0-0.2-0.0-0.0-0.0-0.0-0.0-0.0-0.0-0.2-0.0-0.0-0.0-0.0-0.0-0.2
gpt2	ensemble	tfidf-topk-uniform	fastcompany	21.0495	42	78_www.wired.com-17_www.express.co.uk-91_www.entrepreneur.com-85_www.pcworld.com-58_medium.com	5	0.0-0.2-0.2-0.0-0.0-0.0-0.2-0.0-0.0-0.0-0.0-0.0-0.0-0.0-0.2-0.0-0.0-0.0-0.0-0.0-0.2
gpt2	average	tfidf-topk-uniform	fastcompany	21.5031	42	78_www.wired.com-17_www.express.co.uk-91_www.entrepreneur.com-85_www.pcworld.com-58_medium.com	5	0.0-0.2-0.2-0.0-0.0-0.0-0.2-0.0-0.0-0.0-0.0-0.0-0.0-0.0-0.2-0.0-0.0-0.0-0.0-0.0-0.2
gpt2	ensemble	tfidf-topk-uniform	fastcompany	21.0495	88	78_www.wired.com-17_www.express.co.uk-91_www.entrepreneur.com-85_www.pcworld.com-58_medium.com	5	0.0-0.2-0.2-0.0-0.0-0.0-0.2-0.0-0.0-0.0-0.0-0.0-0.0-0.0-0.2-0.0-0.0-0.0-0.0-0.0-0.2
gpt2	average	tfidf-topk-uniform	fastcompany	21.5031	88	78_www.wired.com-17_www.express.co.uk-91_www.entrepreneur.com-85_www.pcworld.com-58_medium.com	5	0.0-0.2-0.2-0.0-0.0-0.0-0.2-0.0-0.0-0.0-0.0-0.0-0.0-0.0-0.2-0.0-0.0-0.0-0.0-0.0-0.2
deberta	ensemble	uniform	fastcompany	4.1247	10		21
deberta	ensemble	uniform	fastcompany	4.1247	42		21
deberta	ensemble	uniform	fastcompany	4.14488	88		21
gpt2	ensemble	TF-IDF	fastcompany	21.1732	10	58_medium.com	1	0.0-0.0-0.0-0.0-0.0-0.0-0.0-0.0-0.0-0.0-0.0-0.0-0.0-0.0-0.0-0.0-0.0-0.0-0.0-0.0-1.0
gpt2	average	TF-IDF	fastcompany	21.285	10	58_medium.com	1	0.0-0.0-0.0-0.0-0.0-0.0-0.0-0.0-0.0-0.0-0.0-0.0-0.0-0.0-0.0-0.0-0.0-0.0-0.0-0.0-1.0
gpt2	average	Sentence Sim	fastcompany	21.656	10	91_www.entrepreneur.com	1	0.0-0.0-0.0-0.0-0.0-0.0-1.0-0.0-0.0-0.0-0.0-0.0-0.0-0.0-0.0-0.0-0.0-0.0-0.0-0.0-0.0
gpt2	ensemble	Sentence Sim	fastcompany	21.5486	10	91_www.entrepreneur.com	1	0.0-0.0-0.0-0.0-0.0-0.0-1.0-0.0-0.0-0.0-0.0-0.0-0.0-0.0-0.0-0.0-0.0-0.0-0.0-0.0-0.0
gpt2	ensemble	Prior	fastcompany	23.9455	10	17_www.express.co.uk	1	0.0-0.0-1.0-0.0-0.0-0.0-0.0-0.0-0.0-0.0-0.0-0.0-0.0-0.0-0.0-0.0-0.0-0.0-0.0-0.0-0.0
gpt2	ensemble	TF-IDF	fastcompany	21.1732	42	58_medium.com	1	0.0-0.0-0.0-0.0-0.0-0.0-0.0-0.0-0.0-0.0-0.0-0.0-0.0-0.0-0.0-0.0-0.0-0.0-0.0-0.0-1.0
gpt2	average	TF-IDF	fastcompany	21.285	42	58_medium.com	1	0.0-0.0-0.0-0.0-0.0-0.0-0.0-0.0-0.0-0.0-0.0-0.0-0.0-0.0-0.0-0.0-0.0-0.0-0.0-0.0-1.0
gpt2	ensemble	TF-IDF	fastcompany	21.1732	88	58_medium.com	1	0.0-0.0-0.0-0.0-0.0-0.0-0.0-0.0-0.0-0.0-0.0-0.0-0.0-0.0-0.0-0.0-0.0-0.0-0.0-0.0-1.0
gpt2	average	TF-IDF	fastcompany	21.285	88	58_medium.com	1	0.0-0.0-0.0-0.0-0.0-0.0-0.0-0.0-0.0-0.0-0.0-0.0-0.0-0.0-0.0-0.0-0.0-0.0-0.0-0.0-1.0
gpt2	ensemble	TF-IDF	fastcompany	20.9674	10	91_www.entrepreneur.com-58_medium.com	2	0.0-0.0-0.0-0.0-0.0-0.0-0.47261548374706924-0.0-0.0-0.0-0.0-0.0-0.0-0.0-0.0-0.0-0.0-0.0-0.0-0.0-0.5273845162529308
gpt2	average	TF-IDF	fastcompany	21.2567	10	91_www.entrepreneur.com-58_medium.com	2	0.0-0.0-0.0-0.0-0.0-0.0-0.47261548374706924-0.0-0.0-0.0-0.0-0.0-0.0-0.0-0.0-0.0-0.0-0.0-0.0-0.0-0.5273845162529308
gpt2	ensemble	TF-IDF	fastcompany	20.8042	42	78_www.wired.com-58_medium.com	2	0.0-0.49087327862911573-0.0-0.0-0.0-0.0-0.0-0.0-0.0-0.0-0.0-0.0-0.0-0.0-0.0-0.0-0.0-0.0-0.0-0.0-0.5091267213708842
gpt2	average	TF-IDF	fastcompany	21.1108	42	78_www.wired.com-58_medium.com	2	0.0-0.49087327862911573-0.0-0.0-0.0-0.0-0.0-0.0-0.0-0.0-0.0-0.0-0.0-0.0-0.0-0.0-0.0-0.0-0.0-0.0-0.5091267213708842
deberta	average	TF-IDF	fastcompany	5.02403	10	78_www.wired.com-17_www.express.co.uk-91_www.entrepreneur.com-85_www.pcworld.com-58_medium.com	5	0.0-0.1870905009657759-0.1696100113503417-0.0-0.0-0.0-0.21391544720497604-0.0-0.0-0.0-0.0-0.0-0.0-0.0-0.19529375398755394-0.0-0.0-0.0-0.0-0.0-0.23409028649135244
deberta	average	TF-IDF	fastcompany	4.14426	10	58_medium.com	1	0.0-0.0-0.0-0.0-0.0-0.0-0.0-0.0-0.0-0.0-0.0-0.0-0.0-0.0-0.0-0.0-0.0-0.0-0.0-0.0-1.0
deberta	average	TF-IDF	fastcompany	4.60064	10	91_www.entrepreneur.com-58_medium.com	2	0.0-0.0-0.0-0.0-0.0-0.0-0.4774837264693899-0.0-0.0-0.0-0.0-0.0-0.0-0.0-0.0-0.0-0.0-0.0-0.0-0.0-0.5225162735306101
deberta	average	TF-IDF	fastcompany	4.74275	10	91_www.entrepreneur.com-85_www.pcworld.com-58_medium.com	3	0.0-0.0-0.0-0.0-0.0-0.0-0.332528552098108-0.0-0.0-0.0-0.0-0.0-0.0-0.0-0.30358139206776635-0.0-0.0-0.0-0.0-0.0-0.36389005583412576
deberta	ensemble	TF-IDF	fastcompany	3.91282	10	78_www.wired.com-91_www.entrepreneur.com-58_medium.com	3	0.0-0.3061854305090042-0.0-0.0-0.0-0.0-0.32790750839075156-0.0-0.0-0.0-0.0-0.0-0.0-0.0-0.0-0.0-0.0-0.0-0.0-0.0-0.36590706110024424
gpt2	average	TF-IDF	fastcompany	21.2571	88	91_www.entrepreneur.com-58_medium.com	2	0.0-0.0-0.0-0.0-0.0-0.0-0.4737314678652136-0.0-0.0-0.0-0.0-0.0-0.0-0.0-0.0-0.0-0.0-0.0-0.0-0.0-0.5262685321347864
gpt2	ensemble	TF-IDF	fastcompany	20.9674	88	91_www.entrepreneur.com-58_medium.com	2	0.0-0.0-0.0-0.0-0.0-0.0-0.4737314678652136-0.0-0.0-0.0-0.0-0.0-0.0-0.0-0.0-0.0-0.0-0.0-0.0-0.0-0.5262685321347864
gpt2	ensemble	TF-IDF	fastcompany	20.8449	10	78_www.wired.com-91_www.entrepreneur.com-58_medium.com	3	0.0-0.3061854305090042-0.0-0.0-0.0-0.0-0.32790750839075156-0.0-0.0-0.0-0.0-0.0-0.0-0.0-0.0-0.0-0.0-0.0-0.0-0.0-0.36590706110024424
gpt2	average	TF-IDF	fastcompany	21.1848	10	78_www.wired.com-91_www.entrepreneur.com-58_medium.com	3	0.0-0.3061854305090042-0.0-0.0-0.0-0.0-0.32790750839075156-0.0-0.0-0.0-0.0-0.0-0.0-0.0-0.0-0.0-0.0-0.0-0.0-0.0-0.36590706110024424
gpt2	ensemble	TF-IDF	fastcompany	20.8042	42	78_www.wired.com-91_www.entrepreneur.com-58_medium.com	3	0.0-0.3315329759305716-0.0-0.0-0.0-0.0-0.3246057783865137-0.0-0.0-0.0-0.0-0.0-0.0-0.0-0.0-0.0-0.0-0.0-0.0-0.0-0.3438612456829147
gpt2	average	TF-IDF	fastcompany	21.1826	42	78_www.wired.com-91_www.entrepreneur.com-58_medium.com	3	0.0-0.3315329759305716-0.0-0.0-0.0-0.0-0.3246057783865137-0.0-0.0-0.0-0.0-0.0-0.0-0.0-0.0-0.0-0.0-0.0-0.0-0.0-0.3438612456829147
gpt2	ensemble	TF-IDF	fastcompany	20.8042	88	78_www.wired.com-91_www.entrepreneur.com-58_medium.com	3	0.0-0.319364100639129-0.0-0.0-0.0-0.0-0.32243864368598524-0.0-0.0-0.0-0.0-0.0-0.0-0.0-0.0-0.0-0.0-0.0-0.0-0.0-0.35819725567488575
gpt2	average	TF-IDF	fastcompany	21.1825	88	78_www.wired.com-91_www.entrepreneur.com-58_medium.com	3	0.0-0.319364100639129-0.0-0.0-0.0-0.0-0.32243864368598524-0.0-0.0-0.0-0.0-0.0-0.0-0.0-0.0-0.0-0.0-0.0-0.0-0.0-0.35819725567488575
gpt2	ensemble	TF-IDF	fastcompany	20.9265	10	78_www.wired.com-91_www.entrepreneur.com-85_www.pcworld.com-58_medium.com	4	0.0-0.2391623111569837-0.0-0.0-0.0-0.0-0.2561294880102204-0.0-0.0-0.0-0.0-0.0-0.0-0.0-0.21889715405661517-0.0-0.0-0.0-0.0-0.0-0.2858110467761808
gpt2	average	TF-IDF	fastcompany	21.2647	10	78_www.wired.com-91_www.entrepreneur.com-85_www.pcworld.com-58_medium.com	4	0.0-0.2391623111569837-0.0-0.0-0.0-0.0-0.2561294880102204-0.0-0.0-0.0-0.0-0.0-0.0-0.0-0.21889715405661517-0.0-0.0-0.0-0.0-0.0-0.2858110467761808
gpt2	ensemble	TF-IDF	fastcompany	20.9265	42	78_www.wired.com-91_www.entrepreneur.com-85_www.pcworld.com-58_medium.com	4	0.0-0.25907540187530587-0.0-0.0-0.0-0.0-0.25366216512997447-0.0-0.0-0.0-0.0-0.0-0.0-0.0-0.21855314347505367-0.0-0.0-0.0-0.0-0.0-0.26870928951966594
gpt2	average	TF-IDF	fastcompany	21.2656	42	78_www.wired.com-91_www.entrepreneur.com-85_www.pcworld.com-58_medium.com	4	0.0-0.25907540187530587-0.0-0.0-0.0-0.0-0.25366216512997447-0.0-0.0-0.0-0.0-0.0-0.0-0.0-0.21855314347505367-0.0-0.0-0.0-0.0-0.0-0.26870928951966594
gpt2	ensemble	TF-IDF	fastcompany	20.9265	88	78_www.wired.com-91_www.entrepreneur.com-85_www.pcworld.com-58_medium.com	4	0.0-0.24352130327586796-0.0-0.0-0.0-0.0-0.2458657018111129-0.0-0.0-0.0-0.0-0.0-0.0-0.0-0.23748065988469033-0.0-0.0-0.0-0.0-0.0-0.27313233502832873
gpt2	average	TF-IDF	fastcompany	21.2737	88	78_www.wired.com-91_www.entrepreneur.com-85_www.pcworld.com-58_medium.com	4	0.0-0.24352130327586796-0.0-0.0-0.0-0.0-0.2458657018111129-0.0-0.0-0.0-0.0-0.0-0.0-0.0-0.23748065988469033-0.0-0.0-0.0-0.0-0.0-0.27313233502832873
gpt2	ensemble	TF-IDF	fastcompany	21.0495	10	78_www.wired.com-17_www.express.co.uk-91_www.entrepreneur.com-10_www.eventbrite.com-85_www.pcworld.com-58_medium.com	6	0.0-0.1695737844566779-0.1514294270561604-0.0-0.0-0.0-0.18160405953066536-0.0-0.0-0.0-0.1395383527903415-0.0-0.0-0.0-0.15520513512604417-0.0-0.0-0.0-0.0-0.0-0.20264924104011078
gpt2	average	TF-IDF	fastcompany	21.5403	10	78_www.wired.com-17_www.express.co.uk-91_www.entrepreneur.com-10_www.eventbrite.com-85_www.pcworld.com-58_medium.com	6	0.0-0.1695737844566779-0.1514294270561604-0.0-0.0-0.0-0.18160405953066536-0.0-0.0-0.0-0.1395383527903415-0.0-0.0-0.0-0.15520513512604417-0.0-0.0-0.0-0.0-0.0-0.20264924104011078
deberta	average	Sentence Sim	yelp	6.73238	5	70_www.insiderpages.com-39_www.booking.com	2	0.0-0.0-0.0-0.0-0.0-0.0-0.0-0.0-0.5468538940694155-0.0-0.0-0.0-0.0-0.0-0.0-0.0-0.0-0.4531461059305845-0.0-0.0-0.0
gpt2	ensemble	Sentence Sim	fastcompany	21.5486	5	91_www.entrepreneur.com	1	0.0-0.0-0.0-0.0-0.0-0.0-1.0-0.0-0.0-0.0-0.0-0.0-0.0-0.0-0.0-0.0-0.0-0.0-0.0-0.0-0.0
gpt2	average	Sentence Sim	fastcompany	21.656	5	91_www.entrepreneur.com	1	0.0-0.0-0.0-0.0-0.0-0.0-1.0-0.0-0.0-0.0-0.0-0.0-0.0-0.0-0.0-0.0-0.0-0.0-0.0-0.0-0.0
deberta	average	Sentence Sim	fastcompany	4.00614	5	91_www.entrepreneur.com	1	0.0-0.0-0.0-0.0-0.0-0.0-1.0-0.0-0.0-0.0-0.0-0.0-0.0-0.0-0.0-0.0-0.0-0.0-0.0-0.0-0.0
deberta	average	Sentence Sim	fastcompany	4.0176	10	91_www.entrepreneur.com	1	0.0-0.0-0.0-0.0-0.0-0.0-1.0-0.0-0.0-0.0-0.0-0.0-0.0-0.0-0.0-0.0-0.0-0.0-0.0-0.0-0.0
deberta	average	Sentence Sim	fastcompany	4.02188	42	91_www.entrepreneur.com	1	0.0-0.0-0.0-0.0-0.0-0.0-1.0-0.0-0.0-0.0-0.0-0.0-0.0-0.0-0.0-0.0-0.0-0.0-0.0-0.0-0.0
deberta	average	Sentence Sim	fastcompany	4.80521	5	78_www.wired.com-91_www.entrepreneur.com-58_medium.com	3	0.0-0.30810553388188866-0.0-0.0-0.0-0.0-0.37189157426607033-0.0-0.0-0.0-0.0-0.0-0.0-0.0-0.0-0.0-0.0-0.0-0.0-0.0-0.320002891852041
deberta	ensemble	Sentence Sim	fastcompany	4.03308	10	78_www.wired.com-91_www.entrepreneur.com-10_www.eventbrite.com	3	0.0-0.3113501211574464-0.0-0.0-0.0-0.0-0.3664301804472416-0.0-0.0-0.0-0.322219698395312-0.0-0.0-0.0-0.0-0.0-0.0-0.0-0.0-0.0-0.0
deberta	average	Sentence Sim	fastcompany	4.02196	88	91_www.entrepreneur.com	1	0.0-0.0-0.0-0.0-0.0-0.0-1.0-0.0-0.0-0.0-0.0-0.0-0.0-0.0-0.0-0.0-0.0-0.0-0.0-0.0-0.0
deberta	average	Sentence Sim	fastcompany	4.8361	10	78_www.wired.com-91_www.entrepreneur.com-10_www.eventbrite.com	3	0.0-0.30639284030074554-0.0-0.0-0.0-0.0-0.3735543918009899-0.0-0.0-0.0-0.3200527678982644-0.0-0.0-0.0-0.0-0.0-0.0-0.0-0.0-0.0-0.0
deberta	ensemble	Sentence Sim	fastcompany	4.02129	42	78_www.wired.com-91_www.entrepreneur.com-10_www.eventbrite.com	3	0.0-0.3165029410547131-0.0-0.0-0.0-0.0-0.37730972624696113-0.0-0.0-0.0-0.30618733269832576-0.0-0.0-0.0-0.0-0.0-0.0-0.0-0.0-0.0-0.0
deberta	average	Sentence Sim	fastcompany	4.97356	42	91_www.entrepreneur.com-10_www.eventbrite.com-58_medium.com	3	0.0-0.0-0.0-0.0-0.0-0.0-0.37581726902664175-0.0-0.0-0.0-0.31497510924589345-0.0-0.0-0.0-0.0-0.0-0.0-0.0-0.0-0.0-0.30920762172746474
deberta	average	Sentence Sim	fastcompany	4.60833	88	78_www.wired.com-91_www.entrepreneur.com-85_www.pcworld.com	3	0.0-0.3288779244126236-0.0-0.0-0.0-0.0-0.36875342285837187-0.0-0.0-0.0-0.0-0.0-0.0-0.0-0.30236865272900454-0.0-0.0-0.0-0.0-0.0-0.0
deberta	ensemble	Sentence Sim	fastcompany	4.18556	88	91_www.entrepreneur.com-10_www.eventbrite.com-58_medium.com	3	0.0-0.0-0.0-0.0-0.0-0.0-0.35866256561218096-0.0-0.0-0.0-0.32228022303517107-0.0-0.0-0.0-0.0-0.0-0.0-0.0-0.0-0.0-0.319057211352648
deberta	average	TF-IDF	fastcompany	5.03196	42	78_www.wired.com-17_www.express.co.uk-91_www.entrepreneur.com-85_www.pcworld.com-58_medium.com	5	0.0-0.20580693359260627-0.16674188530595882-0.0-0.0-0.0-0.21697676153712192-0.0-0.0-0.0-0.0-0.0-0.0-0.0-0.17241643973410917-0.0-0.0-0.0-0.0-0.0-0.23805797983020394
deberta	average	TF-IDF	fastcompany	4.15247	42	58_medium.com	1	0.0-0.0-0.0-0.0-0.0-0.0-0.0-0.0-0.0-0.0-0.0-0.0-0.0-0.0-0.0-0.0-0.0-0.0-0.0-0.0-1.0
deberta	average	TF-IDF	fastcompany	4.60343	42	91_www.entrepreneur.com-58_medium.com	2	0.0-0.0-0.0-0.0-0.0-0.0-0.4768355947616929-0.0-0.0-0.0-0.0-0.0-0.0-0.0-0.0-0.0-0.0-0.0-0.0-0.0-0.5231644052383072
deberta	average	TF-IDF	fastcompany	4.83721	42	78_www.wired.com-91_www.entrepreneur.com-58_medium.com	3	0.0-0.3114315295037721-0.0-0.0-0.0-0.0-0.32833395616321803-0.0-0.0-0.0-0.0-0.0-0.0-0.0-0.0-0.0-0.0-0.0-0.0-0.0-0.3602345143330099
deberta	ensemble	TF-IDF	fastcompany	3.90518	42	78_www.wired.com-91_www.entrepreneur.com-58_medium.com	3	0.0-0.3315329759305716-0.0-0.0-0.0-0.0-0.3246057783865137-0.0-0.0-0.0-0.0-0.0-0.0-0.0-0.0-0.0-0.0-0.0-0.0-0.0-0.3438612456829147
deberta	average	TF-IDF	fastcompany	5.03907	88	78_www.wired.com-17_www.express.co.uk-91_www.entrepreneur.com-85_www.pcworld.com-58_medium.com	5	0.0-0.19478988287350524-0.17339921157945662-0.0-0.0-0.0-0.19874169909614925-0.0-0.0-0.0-0.0-0.0-0.0-0.0-0.20124139612879222-0.0-0.0-0.0-0.0-0.0-0.23182781032209676
deberta	average	TF-IDF	fastcompany	4.14995	88	58_medium.com	1	0.0-0.0-0.0-0.0-0.0-0.0-0.0-0.0-0.0-0.0-0.0-0.0-0.0-0.0-0.0-0.0-0.0-0.0-0.0-0.0-1.0
deberta	average	TF-IDF	fastcompany	4.57517	88	85_www.pcworld.com-58_medium.com	2	0.0-0.0-0.0-0.0-0.0-0.0-0.0-0.0-0.0-0.0-0.0-0.0-0.0-0.0-0.4646864591874727-0.0-0.0-0.0-0.0-0.0-0.5353135408125272
deberta	average	TF-IDF	fastcompany	4.75075	88	91_www.entrepreneur.com-85_www.pcworld.com-58_medium.com	3	0.0-0.0-0.0-0.0-0.0-0.0-0.3145588297879625-0.0-0.0-0.0-0.0-0.0-0.0-0.0-0.3185152303671495-0.0-0.0-0.0-0.0-0.0-0.366925939844888
deberta	ensemble	TF-IDF	fastcompany	3.92813	88	78_www.wired.com-91_www.entrepreneur.com-58_medium.com	3	0.0-0.319364100639129-0.0-0.0-0.0-0.0-0.32243864368598524-0.0-0.0-0.0-0.0-0.0-0.0-0.0-0.0-0.0-0.0-0.0-0.0-0.0-0.35819725567488575
gpt2	ensemble	Entropy-topk-uniform	fastcompany	21.1318	10	15_www.dailymail.co.uk-78_www.wired.com-91_www.entrepreneur.com-85_www.pcworld.com-60_www.csmonitor.com-58_medium.com	6	0.16666666666666666-0.16666666666666666-0.0-0.0-0.0-0.0-0.16666666666666666-0.0-0.0-0.0-0.0-0.0-0.0-0.0-0.16666666666666666-0.16666666666666666-0.0-0.0-0.0-0.0-0.16666666666666666
gpt2	average	Entropy-topk-uniform	fastcompany	21.6084	10	15_www.dailymail.co.uk-78_www.wired.com-91_www.entrepreneur.com-85_www.pcworld.com-60_www.csmonitor.com-58_medium.com	6	0.16666666666666666-0.16666666666666666-0.0-0.0-0.0-0.0-0.16666666666666666-0.0-0.0-0.0-0.0-0.0-0.0-0.0-0.16666666666666666-0.16666666666666666-0.0-0.0-0.0-0.0-0.16666666666666666
gpt2	ensemble	Entropy-topk-uniform	fastcompany	21.256	10	15_www.dailymail.co.uk-78_www.wired.com-17_www.express.co.uk-91_www.entrepreneur.com-85_www.pcworld.com-60_www.csmonitor.com-58_medium.com	7	0.14285714285714285-0.14285714285714285-0.14285714285714285-0.0-0.0-0.0-0.14285714285714285-0.0-0.0-0.0-0.0-0.0-0.0-0.0-0.14285714285714285-0.14285714285714285-0.0-0.0-0.0-0.0-0.14285714285714285
gpt2	average	Entropy-topk-uniform	fastcompany	21.7767	10	15_www.dailymail.co.uk-78_www.wired.com-17_www.express.co.uk-91_www.entrepreneur.com-85_www.pcworld.com-60_www.csmonitor.com-58_medium.com	7	0.14285714285714285-0.14285714285714285-0.14285714285714285-0.0-0.0-0.0-0.14285714285714285-0.0-0.0-0.0-0.0-0.0-0.0-0.0-0.14285714285714285-0.14285714285714285-0.0-0.0-0.0-0.0-0.14285714285714285
gpt2	ensemble	Entropy-topk-uniform	fastcompany	21.3392	10	15_www.dailymail.co.uk-78_www.wired.com-17_www.express.co.uk-45_www.npr.org-91_www.entrepreneur.com-85_www.pcworld.com-60_www.csmonitor.com-58_medium.com	8	0.125-0.125-0.125-0.125-0.0-0.0-0.125-0.0-0.0-0.0-0.0-0.0-0.0-0.0-0.125-0.125-0.0-0.0-0.0-0.0-0.125
gpt2	average	Entropy-topk-uniform	fastcompany	21.8924	10	15_www.dailymail.co.uk-78_www.wired.com-17_www.express.co.uk-45_www.npr.org-91_www.entrepreneur.com-85_www.pcworld.com-60_www.csmonitor.com-58_medium.com	8	0.125-0.125-0.125-0.125-0.0-0.0-0.125-0.0-0.0-0.0-0.0-0.0-0.0-0.0-0.125-0.125-0.0-0.0-0.0-0.0-0.125
gpt2	ensemble	Entropy-topk-uniform	fastcompany	21.4227	10	15_www.dailymail.co.uk-78_www.wired.com-17_www.express.co.uk-45_www.npr.org-91_www.entrepreneur.com-77_www.androidheadlines.com-85_www.pcworld.com-60_www.csmonitor.com-58_medium.com	9	0.1111111111111111-0.1111111111111111-0.1111111111111111-0.1111111111111111-0.0-0.0-0.1111111111111111-0.0-0.0-0.0-0.0-0.0-0.1111111111111111-0.0-0.1111111111111111-0.1111111111111111-0.0-0.0-0.0-0.0-0.1111111111111111
gpt2	average	Entropy-topk-uniform	fastcompany	21.9889	10	15_www.dailymail.co.uk-78_www.wired.com-17_www.express.co.uk-45_www.npr.org-91_www.entrepreneur.com-77_www.androidheadlines.com-85_www.pcworld.com-60_www.csmonitor.com-58_medium.com	9	0.1111111111111111-0.1111111111111111-0.1111111111111111-0.1111111111111111-0.0-0.0-0.1111111111111111-0.0-0.0-0.0-0.0-0.0-0.1111111111111111-0.0-0.1111111111111111-0.1111111111111111-0.0-0.0-0.0-0.0-0.1111111111111111
gpt2	ensemble	Entropy-topk-uniform	fastcompany	21.4646	10	15_www.dailymail.co.uk-78_www.wired.com-17_www.express.co.uk-45_www.npr.org-91_www.entrepreneur.com-100_www.ign.com-77_www.androidheadlines.com-85_www.pcworld.com-60_www.csmonitor.com-58_medium.com	10	0.1-0.1-0.1-0.1-0.0-0.0-0.1-0.0-0.0-0.1-0.0-0.0-0.1-0.0-0.1-0.1-0.0-0.0-0.0-0.0-0.1
gpt2	average	Entropy-topk-uniform	fastcompany	22.0502	10	15_www.dailymail.co.uk-78_www.wired.com-17_www.express.co.uk-45_www.npr.org-91_www.entrepreneur.com-100_www.ign.com-77_www.androidheadlines.com-85_www.pcworld.com-60_www.csmonitor.com-58_medium.com	10	0.1-0.1-0.1-0.1-0.0-0.0-0.1-0.0-0.0-0.1-0.0-0.0-0.1-0.0-0.1-0.1-0.0-0.0-0.0-0.0-0.1
gpt2	ensemble	TF-IDF	fastcompany	21.0495	42	78_www.wired.com-17_www.express.co.uk-91_www.entrepreneur.com-10_www.eventbrite.com-85_www.pcworld.com-58_medium.com	6	0.0-0.18819623991907608-0.14513773339561703-0.0-0.0-0.0-0.18426398392761967-0.0-0.0-0.0-0.12844733660012211-0.0-0.0-0.0-0.1587602664196423-0.0-0.0-0.0-0.0-0.0-0.1951944397379228
gpt2	average	TF-IDF	fastcompany	21.5195	42	78_www.wired.com-17_www.express.co.uk-91_www.entrepreneur.com-10_www.eventbrite.com-85_www.pcworld.com-58_medium.com	6	0.0-0.18819623991907608-0.14513773339561703-0.0-0.0-0.0-0.18426398392761967-0.0-0.0-0.0-0.12844733660012211-0.0-0.0-0.0-0.1587602664196423-0.0-0.0-0.0-0.0-0.0-0.1951944397379228
gpt2	ensemble	TF-IDF	fastcompany	21.0906	88	78_www.wired.com-17_www.express.co.uk-91_www.entrepreneur.com-10_www.eventbrite.com-85_www.pcworld.com-58_medium.com	6	0.0-0.17323073408900522-0.15129861161228314-0.0-0.0-0.0-0.17489843984531683-0.0-0.0-0.0-0.13734377096906972-0.0-0.0-0.0-0.16893367639858142-0.0-0.0-0.0-0.0-0.0-0.1942947670857436
gpt2	average	TF-IDF	fastcompany	21.5428	88	78_www.wired.com-17_www.express.co.uk-91_www.entrepreneur.com-10_www.eventbrite.com-85_www.pcworld.com-58_medium.com	6	0.0-0.17323073408900522-0.15129861161228314-0.0-0.0-0.0-0.17489843984531683-0.0-0.0-0.0-0.13734377096906972-0.0-0.0-0.0-0.16893367639858142-0.0-0.0-0.0-0.0-0.0-0.1942947670857436
gpt2	average	TF-IDF	fastcompany	21.6367	10	78_www.wired.com-17_www.express.co.uk-91_www.entrepreneur.com-100_www.ign.com-10_www.eventbrite.com-85_www.pcworld.com-58_medium.com	7	0.0-0.15081629282938097-0.13467898288088184-0.0-0.0-0.0-0.16151583282130716-0.0-0.0-0.11061551576145312-0.12410324592793426-0.0-0.0-0.0-0.13803703905525078-0.0-0.0-0.0-0.0-0.0-0.1802330907237919
gpt2	ensemble	TF-IDF	fastcompany	21.1318	10	78_www.wired.com-17_www.express.co.uk-91_www.entrepreneur.com-100_www.ign.com-10_www.eventbrite.com-85_www.pcworld.com-58_medium.com	7	0.0-0.15081629282938097-0.13467898288088184-0.0-0.0-0.0-0.16151583282130716-0.0-0.0-0.11061551576145312-0.12410324592793426-0.0-0.0-0.0-0.13803703905525078-0.0-0.0-0.0-0.0-0.0-0.1802330907237919
gpt2	average	TF-IDF	fastcompany	21.6539	42	78_www.wired.com-17_www.express.co.uk-91_www.entrepreneur.com-10_www.eventbrite.com-77_www.androidheadlines.com-85_www.pcworld.com-58_medium.com	7	0.0-0.16729506327510812-0.12901865787789502-0.0-0.0-0.0-0.16379952577028076-0.0-0.0-0.0-0.11418190561764992-0.0-0.11106054325503736-0.0-0.14112826498376235-0.0-0.0-0.0-0.0-0.0-0.17351603922026643
gpt2	ensemble	TF-IDF	fastcompany	21.1732	42	78_www.wired.com-17_www.express.co.uk-91_www.entrepreneur.com-10_www.eventbrite.com-77_www.androidheadlines.com-85_www.pcworld.com-58_medium.com	7	0.0-0.16729506327510812-0.12901865787789502-0.0-0.0-0.0-0.16379952577028076-0.0-0.0-0.0-0.11418190561764992-0.0-0.11106054325503736-0.0-0.14112826498376235-0.0-0.0-0.0-0.0-0.0-0.17351603922026643
gpt2	average	TF-IDF	fastcompany	21.6351	88	15_www.dailymail.co.uk-78_www.wired.com-17_www.express.co.uk-91_www.entrepreneur.com-10_www.eventbrite.com-85_www.pcworld.com-58_medium.com	7	0.10514760628330555-0.15501593706484654-0.13538992476726408-0.0-0.0-0.0-0.15650828755289709-0.0-0.0-0.0-0.1229024022137495-0.0-0.0-0.0-0.15117070470463206-0.0-0.0-0.0-0.0-0.0-0.17386513741330534
gpt2	ensemble	TF-IDF	fastcompany	21.1318	88	15_www.dailymail.co.uk-78_www.wired.com-17_www.express.co.uk-91_www.entrepreneur.com-10_www.eventbrite.com-85_www.pcworld.com-58_medium.com	7	0.10514760628330555-0.15501593706484654-0.13538992476726408-0.0-0.0-0.0-0.15650828755289709-0.0-0.0-0.0-0.1229024022137495-0.0-0.0-0.0-0.15117070470463206-0.0-0.0-0.0-0.0-0.0-0.17386513741330534
gpt2	average	TF-IDF	fastcompany	21.7094	10	15_www.dailymail.co.uk-78_www.wired.com-17_www.express.co.uk-91_www.entrepreneur.com-100_www.ign.com-10_www.eventbrite.com-85_www.pcworld.com-58_medium.com	8	0.09758814427027762-0.13609841068643894-0.12153591086932812-0.0-0.0-0.0-0.1457538024260074-0.0-0.0-0.09982075285079327-0.11199224045990928-0.0-0.0-0.0-0.12456626057328501-0.0-0.0-0.0-0.0-0.0-0.16264447786396047
gpt2	ensemble	TF-IDF	fastcompany	21.1732	10	15_www.dailymail.co.uk-78_www.wired.com-17_www.express.co.uk-91_www.entrepreneur.com-100_www.ign.com-10_www.eventbrite.com-85_www.pcworld.com-58_medium.com	8	0.09758814427027762-0.13609841068643894-0.12153591086932812-0.0-0.0-0.0-0.1457538024260074-0.0-0.0-0.09982075285079327-0.11199224045990928-0.0-0.0-0.0-0.12456626057328501-0.0-0.0-0.0-0.0-0.0-0.16264447786396047
gpt2	average	TF-IDF	fastcompany	21.7253	42	15_www.dailymail.co.uk-78_www.wired.com-17_www.express.co.uk-91_www.entrepreneur.com-10_www.eventbrite.com-77_www.androidheadlines.com-85_www.pcworld.com-58_medium.com	8	0.0992800941808214-0.15068599363716892-0.11620967337269444-0.0-0.0-0.0-0.14753749342503342-0.0-0.0-0.0-0.10284591527418398-0.0-0.10003444206090407-0.0-0.12711703754459852-0.0-0.0-0.0-0.0-0.0-0.1562893505045953
gpt2	ensemble	TF-IDF	fastcompany	21.2146	42	15_www.dailymail.co.uk-78_www.wired.com-17_www.express.co.uk-91_www.entrepreneur.com-10_www.eventbrite.com-77_www.androidheadlines.com-85_www.pcworld.com-58_medium.com	8	0.0992800941808214-0.15068599363716892-0.11620967337269444-0.0-0.0-0.0-0.14753749342503342-0.0-0.0-0.0-0.10284591527418398-0.0-0.10003444206090407-0.0-0.12711703754459852-0.0-0.0-0.0-0.0-0.0-0.1562893505045953
gpt2	average	TF-IDF	fastcompany	21.7333	88	15_www.dailymail.co.uk-78_www.wired.com-17_www.express.co.uk-91_www.entrepreneur.com-10_www.eventbrite.com-85_www.pcworld.com-99_www.lonelyplanet.com-58_medium.com	8	0.09555244702463173-0.1408700838557667-0.12303502734181479-0.0-0.0-0.0-0.14222625111427206-0.0-0.0-0.0-0.11168704349852454-0.0-0.0-0.0-0.13737574504593372-0.0-0.09125418635609268-0.0-0.0-0.0-0.1579992157629639
gpt2	ensemble	TF-IDF	fastcompany	21.2146	88	15_www.dailymail.co.uk-78_www.wired.com-17_www.express.co.uk-91_www.entrepreneur.com-10_www.eventbrite.com-85_www.pcworld.com-99_www.lonelyplanet.com-58_medium.com	8	0.09555244702463173-0.1408700838557667-0.12303502734181479-0.0-0.0-0.0-0.14222625111427206-0.0-0.0-0.0-0.11168704349852454-0.0-0.0-0.0-0.13737574504593372-0.0-0.09125418635609268-0.0-0.0-0.0-0.1579992157629639
gpt2	average	TF-IDF	fastcompany	21.8637	10	15_www.dailymail.co.uk-78_www.wired.com-17_www.express.co.uk-91_www.entrepreneur.com-10_www.eventbrite.com-77_www.androidheadlines.com-84_www.glassdoor.com-85_www.pcworld.com-58_medium.com	9	0.0886482542485234-0.11975536754640528-0.10856622406781478-0.0-0.0-0.0-0.13692583467170108-0.0-0.0-0.0-0.10422505141786324-0.0-0.08357369326051863-0.0834597471226341-0.12500621446609414-0.0-0.0-0.0-0.0-0.0-0.14983961319844533
gpt2	ensemble	TF-IDF	fastcompany	21.256	10	15_www.dailymail.co.uk-78_www.wired.com-17_www.express.co.uk-91_www.entrepreneur.com-10_www.eventbrite.com-77_www.androidheadlines.com-84_www.glassdoor.com-85_www.pcworld.com-58_medium.com	9	0.0886482542485234-0.11975536754640528-0.10856622406781478-0.0-0.0-0.0-0.13692583467170108-0.0-0.0-0.0-0.10422505141786324-0.0-0.08357369326051863-0.0834597471226341-0.12500621446609414-0.0-0.0-0.0-0.0-0.0-0.14983961319844533
gpt2	average	TF-IDF	fastcompany	21.8217	42	15_www.dailymail.co.uk-78_www.wired.com-17_www.express.co.uk-91_www.entrepreneur.com-100_www.ign.com-10_www.eventbrite.com-85_www.pcworld.com-99_www.lonelyplanet.com-58_medium.com	9	0.08938269219151186-0.12783097601870613-0.10356686030827493-0.0-0.0-0.0-0.1347687889639924-0.0-0.0-0.09935994841905164-0.08813412772789939-0.0-0.0-0.0-0.10709144433641861-0.0-0.10200238899961357-0.0-0.0-0.0-0.14786277303453144
gpt2	ensemble	TF-IDF	fastcompany	21.256	42	15_www.dailymail.co.uk-78_www.wired.com-17_www.express.co.uk-91_www.entrepreneur.com-100_www.ign.com-10_www.eventbrite.com-85_www.pcworld.com-99_www.lonelyplanet.com-58_medium.com	9	0.08938269219151186-0.12783097601870613-0.10356686030827493-0.0-0.0-0.0-0.1347687889639924-0.0-0.0-0.09935994841905164-0.08813412772789939-0.0-0.0-0.0-0.10709144433641861-0.0-0.10200238899961357-0.0-0.0-0.0-0.14786277303453144
gpt2	average	TF-IDF	fastcompany	21.7843	88	15_www.dailymail.co.uk-78_www.wired.com-17_www.express.co.uk-91_www.entrepreneur.com-10_www.eventbrite.com-77_www.androidheadlines.com-85_www.pcworld.com-60_www.csmonitor.com-58_medium.com	9	0.09123440159629684-0.12560172050911564-0.11180888343901901-0.0-0.0-0.0-0.12814987603638317-0.0-0.0-0.0-0.0903116757053962-0.0-0.08685654030022538-0.0-0.12976169613412086-0.08679120121319822-0.0-0.0-0.0-0.0-0.1494840050662447
gpt2	ensemble	TF-IDF	fastcompany	21.256	88	15_www.dailymail.co.uk-78_www.wired.com-17_www.express.co.uk-91_www.entrepreneur.com-10_www.eventbrite.com-77_www.androidheadlines.com-85_www.pcworld.com-60_www.csmonitor.com-58_medium.com	9	0.09123440159629684-0.12560172050911564-0.11180888343901901-0.0-0.0-0.0-0.12814987603638317-0.0-0.0-0.0-0.0903116757053962-0.0-0.08685654030022538-0.0-0.12976169613412086-0.08679120121319822-0.0-0.0-0.0-0.0-0.1494840050662447
gpt2	average	TF-IDF	fastcompany	21.9214	10	15_www.dailymail.co.uk-78_www.wired.com-17_www.express.co.uk-91_www.entrepreneur.com-100_www.ign.com-10_www.eventbrite.com-77_www.androidheadlines.com-84_www.glassdoor.com-85_www.pcworld.com-58_medium.com	10	0.08200398536459208-0.11077959166658198-0.10042908487049423-0.0-0.0-0.0-0.12666311635392144-0.0-0.0-0.07495092757612876-0.09641328713742468-0.0-0.0773097674296799-0.07720436166052354-0.1156368827390799-0.0-0.0-0.0-0.0-0.0-0.13860899520157352
gpt2	ensemble	TF-IDF	fastcompany	21.3392	10	15_www.dailymail.co.uk-78_www.wired.com-17_www.express.co.uk-91_www.entrepreneur.com-100_www.ign.com-10_www.eventbrite.com-77_www.androidheadlines.com-84_www.glassdoor.com-85_www.pcworld.com-58_medium.com	10	0.08200398536459208-0.11077959166658198-0.10042908487049423-0.0-0.0-0.0-0.12666311635392144-0.0-0.0-0.07495092757612876-0.09641328713742468-0.0-0.0773097674296799-0.07720436166052354-0.1156368827390799-0.0-0.0-0.0-0.0-0.0-0.13860899520157352
gpt2	average	TF-IDF	fastcompany	21.9518	42	15_www.dailymail.co.uk-78_www.wired.com-17_www.express.co.uk-91_www.entrepreneur.com-100_www.ign.com-10_www.eventbrite.com-84_www.glassdoor.com-85_www.pcworld.com-99_www.lonelyplanet.com-58_medium.com	10	0.08264237402548474-0.11819128595439539-0.09575691888875983-0.0-0.0-0.0-0.12460592080467175-0.0-0.0-0.09186724878242054-0.08148796337990129-0.0-0.0-0.07540965706856625-0.09901571524403185-0.0-0.09431042382497824-0.0-0.0-0.0-0.1367124920267902
gpt2	ensemble	TF-IDF	fastcompany	21.3392	42	15_www.dailymail.co.uk-78_www.wired.com-17_www.express.co.uk-91_www.entrepreneur.com-100_www.ign.com-10_www.eventbrite.com-84_www.glassdoor.com-85_www.pcworld.com-99_www.lonelyplanet.com-58_medium.com	10	0.08264237402548474-0.11819128595439539-0.09575691888875983-0.0-0.0-0.0-0.12460592080467175-0.0-0.0-0.09186724878242054-0.08148796337990129-0.0-0.0-0.07540965706856625-0.09901571524403185-0.0-0.09431042382497824-0.0-0.0-0.0-0.1367124920267902
gpt2	average	TF-IDF	fastcompany	21.8778	88	15_www.dailymail.co.uk-78_www.wired.com-17_www.express.co.uk-81_www.librarything.com-91_www.entrepreneur.com-10_www.eventbrite.com-77_www.androidheadlines.com-85_www.pcworld.com-60_www.csmonitor.com-58_medium.com	10	0.08431982535270842-0.11608247494394919-0.10333498504408542-0.0-0.07578913351330697-0.0-0.11843750797174799-0.0-0.0-0.0-0.08346703205754943-0.0-0.08027375837090767-0.0-0.1199271696208988-0.08021337127667084-0.0-0.0-0.0-0.0-0.1381547418481752
gpt2	ensemble	TF-IDF	fastcompany	21.2976	88	15_www.dailymail.co.uk-78_www.wired.com-17_www.express.co.uk-81_www.librarything.com-91_www.entrepreneur.com-10_www.eventbrite.com-77_www.androidheadlines.com-85_www.pcworld.com-60_www.csmonitor.com-58_medium.com	10	0.08431982535270842-0.11608247494394919-0.10333498504408542-0.0-0.07578913351330697-0.0-0.11843750797174799-0.0-0.0-0.0-0.08346703205754943-0.0-0.08027375837090767-0.0-0.1199271696208988-0.08021337127667084-0.0-0.0-0.0-0.0-0.1381547418481752
deberta	average	Sentence Sim	fastcompany	4.78386	5	78_www.wired.com-91_www.entrepreneur.com-85_www.pcworld.com-58_medium.com	4	0.0-0.24110169238794593-0.0-0.0-0.0-0.0-0.29101615544088005-0.0-0.0-0.0-0.0-0.0-0.0-0.0-0.21747042531092095-0.0-0.0-0.0-0.0-0.0-0.250411726860253
deberta	average	Sentence Sim	fastcompany	5.03762	10	78_www.wired.com-91_www.entrepreneur.com-10_www.eventbrite.com-58_medium.com	4	0.0-0.2346247996078855-0.0-0.0-0.0-0.0-0.28605474015947346-0.0-0.0-0.0-0.24508508899349976-0.0-0.0-0.0-0.0-0.0-0.0-0.0-0.0-0.0-0.2342353712391412
deberta	average	Sentence Sim	fastcompany	5.03998	42	78_www.wired.com-91_www.entrepreneur.com-10_www.eventbrite.com-58_medium.com	4	0.0-0.235426930438311-0.0-0.0-0.0-0.0-0.28733976297399055-0.0-0.0-0.0-0.24082148611166107-0.0-0.0-0.0-0.0-0.0-0.0-0.0-0.0-0.0-0.23641182047603734
deberta	average	Sentence Sim	fastcompany	4.79732	88	78_www.wired.com-91_www.entrepreneur.com-85_www.pcworld.com-58_medium.com	4	0.0-0.25527774249647134-0.0-0.0-0.0-0.0-0.2862294314623162-0.0-0.0-0.0-0.0-0.0-0.0-0.0-0.23470102837768037-0.0-0.0-0.0-0.0-0.0-0.22379179766353208
deberta	average	Sentence Sim	fastcompany	5.00139	5	78_www.wired.com-91_www.entrepreneur.com-10_www.eventbrite.com-85_www.pcworld.com-58_medium.com	5	0.0-0.19823214278998022-0.0-0.0-0.0-0.0-0.23927146884860195-0.0-0.0-0.0-0.17780692111022697-0.0-0.0-0.0-0.17880267855385454-0.0-0.0-0.0-0.0-0.0-0.2058867886973363
deberta	average	Sentence Sim	fastcompany	5.47998	10	78_www.wired.com-91_www.entrepreneur.com-10_www.eventbrite.com-84_www.glassdoor.com-58_medium.com	5	0.0-0.19276204730254834-0.0-0.0-0.0-0.0-0.23501563963354102-0.0-0.0-0.0-0.20135596747091045-0.0-0.0-0.17842424319722333-0.0-0.0-0.0-0.0-0.0-0.0-0.1924421023957768
deberta	average	Sentence Sim	fastcompany	5.48113	42	78_www.wired.com-91_www.entrepreneur.com-10_www.eventbrite.com-84_www.glassdoor.com-58_medium.com	5	0.0-0.19390414055185995-0.0-0.0-0.0-0.0-0.23666098726307852-0.0-0.0-0.0-0.19834724601797057-0.0-0.0-0.17637230290156308-0.0-0.0-0.0-0.0-0.0-0.0-0.19471532326552768
deberta	average	Sentence Sim	fastcompany	5.01612	88	78_www.wired.com-91_www.entrepreneur.com-10_www.eventbrite.com-85_www.pcworld.com-58_medium.com	5	0.0-0.21000962396784364-0.0-0.0-0.0-0.0-0.2354726843087842-0.0-0.0-0.0-0.17732888925580115-0.0-0.0-0.0-0.19308175570827205-0.0-0.0-0.0-0.0-0.0-0.18410704675929893
deberta	average	TF-IDF	fastcompany	5.02286	5	78_www.wired.com-17_www.express.co.uk-91_www.entrepreneur.com-85_www.pcworld.com-58_medium.com	5	0.0-0.16974991985229013-0.1895229052840354-0.0-0.0-0.0-0.2035027664519605-0.0-0.0-0.0-0.0-0.0-0.0-0.0-0.2006941196601216-0.0-0.0-0.0-0.0-0.0-0.2365302887515925
deberta	average	TF-IDF	fastcompany	4.80676	10	78_www.wired.com-91_www.entrepreneur.com-85_www.pcworld.com-58_medium.com	4	0.0-0.22530437929534022-0.0-0.0-0.0-0.0-0.2576084130696655-0.0-0.0-0.0-0.0-0.0-0.0-0.0-0.2351831749623229-0.0-0.0-0.0-0.0-0.0-0.2819040326726713
deberta	average	TF-IDF	fastcompany	4.81608	42	78_www.wired.com-91_www.entrepreneur.com-85_www.pcworld.com-58_medium.com	4	0.0-0.2469906142686354-0.0-0.0-0.0-0.0-0.2603956177694018-0.0-0.0-0.0-0.0-0.0-0.0-0.0-0.20691840462593955-0.0-0.0-0.0-0.0-0.0-0.28569536333602336
deberta	average	TF-IDF	fastcompany	4.81744	88	78_www.wired.com-91_www.entrepreneur.com-85_www.pcworld.com-58_medium.com	4	0.0-0.23565170225122437-0.0-0.0-0.0-0.0-0.24043250609027597-0.0-0.0-0.0-0.0-0.0-0.0-0.0-0.24345657413818983-0.0-0.0-0.0-0.0-0.0-0.2804592175203098
deberta	average	TF-IDF	fastcompany	5.19757	5	78_www.wired.com-17_www.express.co.uk-91_www.entrepreneur.com-10_www.eventbrite.com-85_www.pcworld.com-58_medium.com	6	0.0-0.14644138466833967-0.16349932123862676-0.0-0.0-0.0-0.17555959336531482-0.0-0.0-0.0-0.13731102320538732-0.0-0.0-0.0-0.17313660473828585-0.0-0.0-0.0-0.0-0.0-0.20405207278404558
deberta	average	TF-IDF	fastcompany	5.20153	10	78_www.wired.com-17_www.express.co.uk-91_www.entrepreneur.com-10_www.eventbrite.com-85_www.pcworld.com-58_medium.com	6	0.0-0.16089268083652017-0.14585994094837032-0.0-0.0-0.0-0.18396139619855742-0.0-0.0-0.0-0.1400275267532051-0.0-0.0-0.0-0.16794725262632787-0.0-0.0-0.0-0.0-0.0-0.20131120263701915
deberta	average	TF-IDF	fastcompany	5.2304	42	78_www.wired.com-17_www.express.co.uk-91_www.entrepreneur.com-85_www.pcworld.com-99_www.lonelyplanet.com-58_medium.com	6	0.0-0.1767761986086188-0.14322159180297245-0.0-0.0-0.0-0.18637043184787605-0.0-0.0-0.0-0.0-0.0-0.0-0.0-0.1480957043661177-0.0-0.1410580998279371-0.0-0.0-0.0-0.20447797354647798
deberta	average	TF-IDF	fastcompany	5.08374	88	15_www.dailymail.co.uk-78_www.wired.com-17_www.express.co.uk-91_www.entrepreneur.com-85_www.pcworld.com-58_medium.com	6	0.12395295005550011-0.1706451022503689-0.1519058677668851-0.0-0.0-0.0-0.174107079194139-0.0-0.0-0.0-0.0-0.0-0.0-0.0-0.1762969314053409-0.0-0.0-0.0-0.0-0.0-0.2030920693277659
deberta	average	Sentence Sim	fastcompany	5.37018	5	78_www.wired.com-91_www.entrepreneur.com-10_www.eventbrite.com-84_www.glassdoor.com-85_www.pcworld.com-58_medium.com	6	0.0-0.16863506309286433-0.0-0.0-0.0-0.0-0.2035470064426192-0.0-0.0-0.0-0.15125943218773835-0.0-0.0-0.14930514940996695-0.152106517917469-0.0-0.0-0.0-0.0-0.0-0.17514683094934222
deberta	average	Sentence Sim	fastcompany	5.39904	10	78_www.wired.com-91_www.entrepreneur.com-10_www.eventbrite.com-84_www.glassdoor.com-85_www.pcworld.com-58_medium.com	6	0.0-0.1651535981398244-0.0-0.0-0.0-0.0-0.20135539670675875-0.0-0.0-0.0-0.1725166494136248-0.0-0.0-0.15286933383284806-0.1432255443904438-0.0-0.0-0.0-0.0-0.0-0.16487947751650012
deberta	average	Sentence Sim	fastcompany	5.40097	42	78_www.wired.com-91_www.entrepreneur.com-10_www.eventbrite.com-84_www.glassdoor.com-85_www.pcworld.com-58_medium.com	6	0.0-0.16579460689811007-0.0-0.0-0.0-0.0-0.20235315883265892-0.0-0.0-0.0-0.16959361254112593-0.0-0.0-0.15080429197672726-0.14496613416169904-0.0-0.0-0.0-0.0-0.0-0.1664881955896786
deberta	average	Sentence Sim	fastcompany	5.1887	88	78_www.wired.com-91_www.entrepreneur.com-10_www.eventbrite.com-77_www.androidheadlines.com-85_www.pcworld.com-58_medium.com	6	0.0-0.17966082170987915-0.0-0.0-0.0-0.0-0.20144417743267257-0.0-0.0-0.0-0.15170282844502217-0.0-0.14451148325760269-0.0-0.16517922480088754-0.0-0.0-0.0-0.0-0.0-0.15750146435393583
deberta	average	TF-IDF	fastcompany	5.20348	5	15_www.dailymail.co.uk-78_www.wired.com-17_www.express.co.uk-91_www.entrepreneur.com-10_www.eventbrite.com-85_www.pcworld.com-58_medium.com	7	0.11574537608728783-0.1294914715251595-0.1445750308118456-0.0-0.0-0.0-0.15523938220551514-0.0-0.0-0.0-0.12141790718354947-0.0-0.0-0.0-0.15309684330837683-0.0-0.0-0.0-0.0-0.0-0.1804339888782656
deberta	average	TF-IDF	fastcompany	5.21068	10	15_www.dailymail.co.uk-78_www.wired.com-17_www.express.co.uk-91_www.entrepreneur.com-10_www.eventbrite.com-85_www.pcworld.com-58_medium.com	7	0.1064247456576172-0.14376971820032133-0.13033683383130493-0.0-0.0-0.0-0.16438335139730578-0.0-0.0-0.0-0.12512513283343005-0.0-0.0-0.0-0.15007350898167535-0.0-0.0-0.0-0.0-0.0-0.17988670909834534
deberta	average	TF-IDF	fastcompany	5.32448	42	78_www.wired.com-17_www.express.co.uk-91_www.entrepreneur.com-100_www.ign.com-85_www.pcworld.com-99_www.lonelyplanet.com-58_medium.com	7	0.0-0.1554207783388117-0.12591973041701257-0.0-0.0-0.0-0.16385598177313176-0.0-0.0-0.12080483932731141-0.0-0.0-0.0-0.0-0.13020502659510383-0.0-0.12401759874240732-0.0-0.0-0.0-0.1797760448062215
deberta	average	TF-IDF	fastcompany	5.21392	88	15_www.dailymail.co.uk-78_www.wired.com-17_www.express.co.uk-91_www.entrepreneur.com-10_www.eventbrite.com-85_www.pcworld.com-58_medium.com	7	0.1104061865376736-0.15199537390888118-0.1353041421388398-0.0-0.0-0.0-0.15507899291167107-0.0-0.0-0.0-0.1092895611743079-0.0-0.0-0.0-0.15702951713567412-0.0-0.0-0.0-0.0-0.0-0.18089622619295226
deberta	average	TF-IDF	fastcompany	5.25872	5	15_www.dailymail.co.uk-78_www.wired.com-17_www.express.co.uk-81_www.librarything.com-91_www.entrepreneur.com-10_www.eventbrite.com-85_www.pcworld.com-58_medium.com	8	0.10383751000014228-0.11616940930138508-0.12970117438103587-0.0-0.10287984271756467-0.0-0.13926837898063982-0.0-0.0-0.0-0.10892645198941003-0.0-0.0-0.0-0.13734626414825538-0.0-0.0-0.0-0.0-0.0-0.16187096848156682
deberta	ensemble	TF-IDF	fastcompany	4.07664	5	15_www.dailymail.co.uk-78_www.wired.com-17_www.express.co.uk-91_www.entrepreneur.com-100_www.ign.com-10_www.eventbrite.com-85_www.pcworld.com-99_www.lonelyplanet.com-58_medium.com	9	0.08726019853942034-0.12785946977387092-0.11304750749687893-0.0-0.0-0.0-0.13473321208036398-0.0-0.0-0.0900562170000517-0.0989496801168168-0.0-0.0-0.0-0.11729913762033596-0.0-0.08662760712191352-0.0-0.0-0.0-0.14416697025034786
deberta	average	TF-IDF	fastcompany	5.3014	10	15_www.dailymail.co.uk-78_www.wired.com-17_www.express.co.uk-91_www.entrepreneur.com-10_www.eventbrite.com-77_www.androidheadlines.com-85_www.pcworld.com-58_medium.com	8	0.09672052478898015-0.13066023796603365-0.1184522160668715-0.0-0.0-0.0-0.14939424017858374-0.0-0.0-0.0-0.11371573816934004-0.0-0.09118387653804538-0.0-0.13638922466705902-0.0-0.0-0.0-0.0-0.0-0.16348394162508653
deberta	average	TF-IDF	fastcompany	5.30743	42	15_www.dailymail.co.uk-78_www.wired.com-17_www.express.co.uk-91_www.entrepreneur.com-100_www.ign.com-85_www.pcworld.com-99_www.lonelyplanet.com-58_medium.com	8	0.09802175397659808-0.1401861610416333-0.1135768575812766-0.0-0.0-0.0-0.14779453104017187-0.0-0.0-0.10896333708758722-0.0-0.0-0.0-0.0-0.11744210151168213-0.0-0.11186117618971059-0.0-0.0-0.0-0.16215408157134015
deberta	average	TF-IDF	fastcompany	5.31043	88	15_www.dailymail.co.uk-78_www.wired.com-17_www.express.co.uk-91_www.entrepreneur.com-10_www.eventbrite.com-77_www.androidheadlines.com-85_www.pcworld.com-58_medium.com	8	0.0999053028370968-0.13753888560423153-0.12243517976125193-0.0-0.0-0.0-0.14032921737792095-0.0-0.0-0.0-0.09889488124224742-0.0-0.09511137038497036-0.0-0.14209422457000997-0.0-0.0-0.0-0.0-0.0-0.16369093822227102
deberta	ensemble	Entropy	fastcompany	3.72635	10	15_www.dailymail.co.uk-45_www.npr.org-journals.plos.org	3	0.3342772716079783-0.0-0.0-0.3360009849790692-0.0-0.0-0.0-0.0-0.0-0.0-0.0-0.0-0.0-0.0-0.0-0.0-0.0-0.0-0.32972174341295246-0.0-0.0
deberta	ensemble	Entropy	fastcompany	3.72999	42	15_www.dailymail.co.uk-45_www.npr.org-journals.plos.org	3	0.33440355643368735-0.0-0.0-0.33637935292664856-0.0-0.0-0.0-0.0-0.0-0.0-0.0-0.0-0.0-0.0-0.0-0.0-0.0-0.0-0.3292170906396641-0.0-0.0
deberta	ensemble	Entropy	fastcompany	3.74825	88	15_www.dailymail.co.uk-45_www.npr.org-journals.plos.org	3	0.33431879773343187-0.0-0.0-0.33616654348361663-0.0-0.0-0.0-0.0-0.0-0.0-0.0-0.0-0.0-0.0-0.0-0.0-0.0-0.0-0.32951465878295144-0.0-0.0
deberta	average	Sentence Sim	fastcompany	5.49798	5	78_www.wired.com-91_www.entrepreneur.com-10_www.eventbrite.com-77_www.androidheadlines.com-84_www.glassdoor.com-85_www.pcworld.com-58_medium.com	7	0.0-0.1467286383840327-0.0-0.0-0.0-0.0-0.1771053691605326-0.0-0.0-0.0-0.13161017715175213-0.0-0.12990432895185122-0.1299097641668093-0.13234722277819744-0.0-0.0-0.0-0.0-0.0-0.15239449940682456
deberta	average	Sentence Sim	fastcompany	5.45364	10	78_www.wired.com-45_www.npr.org-91_www.entrepreneur.com-10_www.eventbrite.com-84_www.glassdoor.com-85_www.pcworld.com-58_medium.com	7	0.0-0.14573314903998347-0.0-0.11759022702853214-0.0-0.0-0.17767796989459084-0.0-0.0-0.0-0.15223037744287496-0.0-0.0-0.13489339416174298-0.1263836201092864-0.0-0.0-0.0-0.0-0.0-0.14549126232298912
deberta	average	Sentence Sim	fastcompany	5.45297	42	78_www.wired.com-91_www.entrepreneur.com-10_www.eventbrite.com-84_www.glassdoor.com-85_www.pcworld.com-60_www.csmonitor.com-58_medium.com	7	0.0-0.14710814037490694-0.0-0.0-0.0-0.0-0.17954623164042108-0.0-0.0-0.0-0.15047896567419602-0.0-0.0-0.13380736182139186-0.12862721419504697-0.11270853058982193-0.0-0.0-0.0-0.0-0.14772355570421505
deberta	average	Sentence Sim	fastcompany	5.27264	88	78_www.wired.com-91_www.entrepreneur.com-10_www.eventbrite.com-77_www.androidheadlines.com-85_www.pcworld.com-60_www.csmonitor.com-58_medium.com	7	0.0-0.1583269972418214-0.0-0.0-0.0-0.0-0.17752368836577542-0.0-0.0-0.0-0.1336888759174076-0.0-0.12735146702203828-0.0-0.14556501757343493-0.11874500108047023-0.0-0.0-0.0-0.0-0.13879895279905208
deberta	average	Sentence Sim	fastcompany	5.52697	5	78_www.wired.com-45_www.npr.org-91_www.entrepreneur.com-10_www.eventbrite.com-77_www.androidheadlines.com-84_www.glassdoor.com-85_www.pcworld.com-58_medium.com	8	0.0-0.13036389264575635-0.0-0.11153068629618781-0.0-0.0-0.1573526857913187-0.0-0.0-0.0-0.11693160377045436-0.0-0.11541600999100553-0.11542083901270915-0.11758644619235062-0.0-0.0-0.0-0.0-0.0-0.13539783630021743
deberta	average	Sentence Sim	fastcompany	5.45142	10	78_www.wired.com-45_www.npr.org-91_www.entrepreneur.com-10_www.eventbrite.com-84_www.glassdoor.com-85_www.pcworld.com-60_www.csmonitor.com-58_medium.com	8	0.0-0.13048881419476313-0.0-0.10528976685761657-0.0-0.0-0.15909206486519364-0.0-0.0-0.0-0.1363064036411645-0.0-0.0-0.12078294583508456-0.1131633319552955-0.1046044427478739-0.0-0.0-0.0-0.0-0.1302722299030081
deberta	average	Sentence Sim	fastcompany	5.45626	42	78_www.wired.com-45_www.npr.org-91_www.entrepreneur.com-10_www.eventbrite.com-84_www.glassdoor.com-85_www.pcworld.com-60_www.csmonitor.com-58_medium.com	8	0.0-0.13254971874034743-0.0-0.09896407906086771-0.0-0.0-0.1617776041772776-0.0-0.0-0.0-0.1355869534182173-0.0-0.0-0.12056523948717351-0.11589774040006917-0.10155443465769658-0.0-0.0-0.0-0.0-0.13310423005835062
deberta	average	Sentence Sim	fastcompany	5.5024	88	78_www.wired.com-91_www.entrepreneur.com-10_www.eventbrite.com-77_www.androidheadlines.com-84_www.glassdoor.com-85_www.pcworld.com-60_www.csmonitor.com-58_medium.com	8	0.0-0.1422485458153787-0.0-0.0-0.0-0.0-0.15949577114283628-0.0-0.0-0.0-0.12011247937645195-0.0-0.11441864815809794-0.10155217812844142-0.13078257297954776-0.10668618757888436-0.0-0.0-0.0-0.0-0.12470361682036162
deberta	average	Sentence Sim	fastcompany	5.51383	5	78_www.wired.com-45_www.npr.org-91_www.entrepreneur.com-10_www.eventbrite.com-77_www.androidheadlines.com-84_www.glassdoor.com-85_www.pcworld.com-60_www.csmonitor.com-58_medium.com	9	0.0-0.11793188876023973-0.0-0.10089468964674535-0.0-0.0-0.14234692643991728-0.0-0.0-0.0-0.10578055478817086-0.0-0.10440949388030611-0.10441386238786457-0.10637294890963521-0.09536385906562833-0.0-0.0-0.0-0.0-0.12248577612149249
deberta	ensemble	Sentence Sim	fastcompany	3.98999	5	15_www.dailymail.co.uk-78_www.wired.com-45_www.npr.org-91_www.entrepreneur.com-10_www.eventbrite.com-77_www.androidheadlines.com-84_www.glassdoor.com-85_www.pcworld.com-60_www.csmonitor.com-58_medium.com	10	0.06889337935552674-0.113609304641105-0.0-0.09555384299981878-0.0-0.0-0.13552189478229423-0.0-0.0-0.0-0.0995897913695477-0.0-0.0901365743425089-0.09607070315925637-0.10213110955052168-0.08881259220696436-0.0-0.0-0.0-0.0-0.10968080759245637
deberta	average	Sentence Sim	fastcompany	5.53108	10	78_www.wired.com-45_www.npr.org-91_www.entrepreneur.com-10_www.eventbrite.com-77_www.androidheadlines.com-84_www.glassdoor.com-85_www.pcworld.com-60_www.csmonitor.com-58_medium.com	9	0.0-0.11828134107402831-0.0-0.09543971184152635-0.0-0.0-0.14420870403807076-0.0-0.0-0.0-0.12355468412480825-0.0-0.09355187412856995-0.10948347488944285-0.10257669016824413-0.09481850108663559-0.0-0.0-0.0-0.0-0.11808501864867377
deberta	ensemble	Sentence Sim	fastcompany	4.1046	10	78_www.wired.com-45_www.npr.org-91_www.entrepreneur.com-70_www.insiderpages.com-10_www.eventbrite.com-77_www.androidheadlines.com-84_www.glassdoor.com-85_www.pcworld.com-60_www.csmonitor.com-58_medium.com	10	0.0-0.11430966549647381-0.0-0.08476822094273806-0.0-0.0-0.13453186142669002-0.0-0.0686436527337957-0.0-0.11830034240236198-0.0-0.08862447267798457-0.09525959557870703-0.09418727534389892-0.08911465655096434-0.0-0.0-0.0-0.0-0.11226025684638549
deberta	average	Sentence Sim	fastcompany	5.53181	42	78_www.wired.com-45_www.npr.org-91_www.entrepreneur.com-10_www.eventbrite.com-77_www.androidheadlines.com-84_www.glassdoor.com-85_www.pcworld.com-60_www.csmonitor.com-58_medium.com	9	0.0-0.12081614544244426-0.0-0.09020357555655728-0.0-0.0-0.1474567184401173-0.0-0.0-0.0-0.12358451786957235-0.0-0.0885220535313859-0.10989255690326559-0.10563823442020759-0.09256462755657834-0.0-0.0-0.0-0.0-0.12132157027987141
deberta	ensemble	Sentence Sim	fastcompany	4.13276	42	78_www.wired.com-45_www.npr.org-81_www.librarything.com-91_www.entrepreneur.com-10_www.eventbrite.com-77_www.androidheadlines.com-84_www.glassdoor.com-85_www.pcworld.com-60_www.csmonitor.com-58_medium.com	10	0.0-0.1126534166324825-0.0-0.09140060573318387-0.07101897655343203-0.0-0.134296476515329-0.0-0.0-0.0-0.1089817650449267-0.0-0.08974292385723663-0.10533722669670009-0.09494209365340998-0.086307350628977-0.0-0.0-0.0-0.0-0.10531916468432226
deberta	average	Sentence Sim	fastcompany	5.49192	88	78_www.wired.com-45_www.npr.org-91_www.entrepreneur.com-10_www.eventbrite.com-77_www.androidheadlines.com-84_www.glassdoor.com-85_www.pcworld.com-60_www.csmonitor.com-58_medium.com	9	0.0-0.12995762145591042-0.0-0.08640456947391506-0.0-0.0-0.14571460770432942-0.0-0.0-0.0-0.1097342123074851-0.0-0.10453235412421012-0.0927776058981151-0.11948236106655906-0.09746801347231751-0.0-0.0-0.0-0.0-0.1139286544971582
deberta	ensemble	Sentence Sim	fastcompany	4.14084	88	78_www.wired.com-45_www.npr.org-81_www.librarything.com-91_www.entrepreneur.com-10_www.eventbrite.com-77_www.androidheadlines.com-84_www.glassdoor.com-85_www.pcworld.com-60_www.csmonitor.com-58_medium.com	10	0.0-0.10965878890621779-0.0-0.08938454944408669-0.06703509786291265-0.0-0.1285885615222216-0.0-0.0-0.0-0.11554467697630819-0.0-0.09529697104856136-0.09262625105293237-0.1001907252570373-0.08728522281647094-0.0-0.0-0.0-0.0-0.11438915511325126
deberta	average	TF-IDF	fastcompany	5.33425	5	15_www.dailymail.co.uk-78_www.wired.com-17_www.express.co.uk-81_www.librarything.com-91_www.entrepreneur.com-100_www.ign.com-10_www.eventbrite.com-85_www.pcworld.com-58_medium.com	9	0.09423517069623602-0.10542668169895379-0.11770710129010645-0.0-0.09336606337804457-0.0-0.12638958181692433-0.0-0.0-0.0924746683919241-0.09885351446258049-0.0-0.0-0.0-0.12464521391627585-0.0-0.0-0.0-0.0-0.0-0.1469020043489543
deberta	ensemble	TF-IDF	fastcompany	4.15705	5	15_www.dailymail.co.uk-78_www.wired.com-17_www.express.co.uk-81_www.librarything.com-91_www.entrepreneur.com-100_www.ign.com-10_www.eventbrite.com-85_www.pcworld.com-99_www.lonelyplanet.com-58_medium.com	10	0.08043510731591128-0.11785889036191893-0.1042054516206484-0.0-0.07821539874706794-0.0-0.12419500017302505-0.0-0.0-0.08301243407774019-0.09121029143058516-0.0-0.0-0.0-0.10812453879867419-0.0-0.07985199428836871-0.0-0.0-0.0-0.13289089318606023
deberta	average	TF-IDF	fastcompany	5.46182	10	15_www.dailymail.co.uk-78_www.wired.com-17_www.express.co.uk-91_www.entrepreneur.com-10_www.eventbrite.com-77_www.androidheadlines.com-84_www.glassdoor.com-85_www.pcworld.com-58_medium.com	9	0.0886482542485234-0.11975536754640528-0.10856622406781478-0.0-0.0-0.0-0.13692583467170108-0.0-0.0-0.0-0.10422505141786324-0.0-0.08357369326051863-0.0834597471226341-0.12500621446609414-0.0-0.0-0.0-0.0-0.0-0.14983961319844533
deberta	ensemble	TF-IDF	fastcompany	4.08461	10	15_www.dailymail.co.uk-78_www.wired.com-17_www.express.co.uk-91_www.entrepreneur.com-100_www.ign.com-10_www.eventbrite.com-85_www.pcworld.com-99_www.lonelyplanet.com-58_medium.com	9	0.08922769183155456-0.12443875368570298-0.11112383458672402-0.0-0.0-0.0-0.13326696048370384-0.0-0.0-0.09126903109353506-0.10239777786537586-0.0-0.0-0.0-0.11389457186785974-0.0-0.08567078000344154-0.0-0.0-0.0-0.1487105985821025
deberta	average	TF-IDF	fastcompany	5.3997	42	15_www.dailymail.co.uk-78_www.wired.com-17_www.express.co.uk-91_www.entrepreneur.com-100_www.ign.com-10_www.eventbrite.com-85_www.pcworld.com-99_www.lonelyplanet.com-58_medium.com	9	0.08938269219151186-0.12783097601870613-0.10356686030827493-0.0-0.0-0.0-0.1347687889639924-0.0-0.0-0.09935994841905164-0.08813412772789939-0.0-0.0-0.0-0.10709144433641861-0.0-0.10200238899961357-0.0-0.0-0.0-0.14786277303453144
deberta	ensemble	TF-IDF	fastcompany	3.94736	42	15_www.dailymail.co.uk-78_www.wired.com-17_www.express.co.uk-91_www.entrepreneur.com-10_www.eventbrite.com-77_www.androidheadlines.com-85_www.pcworld.com-60_www.csmonitor.com-58_medium.com	9	0.0908005997284786-0.1378159308352043-0.10628422669777896-0.0-0.0-0.0-0.1349363434429275-0.0-0.0-0.0-0.09406186470282558-0.0-0.0914905188958664-0.0-0.11625999491635033-0.08540981474996251-0.0-0.0-0.0-0.0-0.14294070603060585
deberta	average	TF-IDF	fastcompany	5.32991	88	15_www.dailymail.co.uk-78_www.wired.com-17_www.express.co.uk-91_www.entrepreneur.com-10_www.eventbrite.com-77_www.androidheadlines.com-85_www.pcworld.com-60_www.csmonitor.com-58_medium.com	9	0.09123440159629684-0.12560172050911564-0.11180888343901901-0.0-0.0-0.0-0.12814987603638317-0.0-0.0-0.0-0.0903116757053962-0.0-0.08685654030022538-0.0-0.12976169613412086-0.08679120121319822-0.0-0.0-0.0-0.0-0.1494840050662447
deberta	ensemble	TF-IDF	fastcompany	3.92813	88	15_www.dailymail.co.uk-78_www.wired.com-17_www.express.co.uk-91_www.entrepreneur.com-10_www.eventbrite.com-77_www.androidheadlines.com-85_www.pcworld.com-60_www.csmonitor.com-58_medium.com	9	0.09123440159629684-0.12560172050911564-0.11180888343901901-0.0-0.0-0.0-0.12814987603638317-0.0-0.0-0.0-0.0903116757053962-0.0-0.08685654030022538-0.0-0.12976169613412086-0.08679120121319822-0.0-0.0-0.0-0.0-0.1494840050662447
deberta	average	TF-IDF	fastcompany	5.42759	5	15_www.dailymail.co.uk-78_www.wired.com-17_www.express.co.uk-81_www.librarything.com-91_www.entrepreneur.com-100_www.ign.com-10_www.eventbrite.com-85_www.pcworld.com-99_www.lonelyplanet.com-58_medium.com	10	0.08688646327705488-0.09720523070293309-0.1085279907504843-0.0-0.08608513124223237-0.0-0.11653338852154431-0.0-0.0-0.08526324959067189-0.09114465640272756-0.0-0.0-0.0-0.11492505103542755-0.0-0.07798264029116532-0.0-0.0-0.0-0.1354461981857586
deberta	average	TF-IDF	fastcompany	5.52611	10	15_www.dailymail.co.uk-78_www.wired.com-17_www.express.co.uk-91_www.entrepreneur.com-100_www.ign.com-10_www.eventbrite.com-77_www.androidheadlines.com-84_www.glassdoor.com-85_www.pcworld.com-58_medium.com	10	0.08200398536459208-0.11077959166658198-0.10042908487049423-0.0-0.0-0.0-0.12666311635392144-0.0-0.0-0.07495092757612876-0.09641328713742468-0.0-0.0773097674296799-0.07720436166052354-0.1156368827390799-0.0-0.0-0.0-0.0-0.0-0.13860899520157352
deberta	ensemble	TF-IDF	fastcompany	4.0966	10	15_www.dailymail.co.uk-78_www.wired.com-17_www.express.co.uk-91_www.entrepreneur.com-100_www.ign.com-10_www.eventbrite.com-77_www.androidheadlines.com-85_www.pcworld.com-99_www.lonelyplanet.com-58_medium.com	10	0.08221424155814126-0.11465765329920206-0.1023893097764635-0.0-0.0-0.0-0.12279194783621926-0.0-0.0-0.08409512803790596-0.09434913614411974-0.0-0.07860172250844957-0.0-0.10494226233468358-0.0-0.0789369091265286-0.0-0.0-0.0-0.13702168937828665
deberta	average	TF-IDF	fastcompany	5.56566	42	15_www.dailymail.co.uk-78_www.wired.com-17_www.express.co.uk-91_www.entrepreneur.com-100_www.ign.com-10_www.eventbrite.com-84_www.glassdoor.com-85_www.pcworld.com-99_www.lonelyplanet.com-58_medium.com	10	0.08264237402548474-0.11819128595439539-0.09575691888875983-0.0-0.0-0.0-0.12460592080467175-0.0-0.0-0.09186724878242054-0.08148796337990129-0.0-0.0-0.07540965706856625-0.09901571524403185-0.0-0.09431042382497824-0.0-0.0-0.0-0.1367124920267902
deberta	ensemble	TF-IDF	fastcompany	4.00952	42	15_www.dailymail.co.uk-78_www.wired.com-17_www.express.co.uk-91_www.entrepreneur.com-10_www.eventbrite.com-77_www.androidheadlines.com-85_www.pcworld.com-60_www.csmonitor.com-99_www.lonelyplanet.com-58_medium.com	10	0.08369652160937459-0.12703345647228156-0.09796873702538234-0.0-0.0-0.0-0.12437916289796075-0.0-0.0-0.0-0.08670263098767772-0.0-0.08433246272292082-0.0-0.10716401880515568-0.07872750210074733-0.07823822904636511-0.0-0.0-0.0-0.1317572783321342
deberta	average	TF-IDF	fastcompany	5.35547	88	15_www.dailymail.co.uk-78_www.wired.com-17_www.express.co.uk-81_www.librarything.com-91_www.entrepreneur.com-10_www.eventbrite.com-77_www.androidheadlines.com-85_www.pcworld.com-60_www.csmonitor.com-58_medium.com	10	0.08431982535270842-0.11608247494394919-0.10333498504408542-0.0-0.07578913351330697-0.0-0.11843750797174799-0.0-0.0-0.0-0.08346703205754943-0.0-0.08027375837090767-0.0-0.1199271696208988-0.08021337127667084-0.0-0.0-0.0-0.0-0.1381547418481752
deberta	ensemble	TF-IDF	fastcompany	3.99389	88	15_www.dailymail.co.uk-78_www.wired.com-17_www.express.co.uk-81_www.librarything.com-91_www.entrepreneur.com-10_www.eventbrite.com-77_www.androidheadlines.com-85_www.pcworld.com-60_www.csmonitor.com-58_medium.com	10	0.08431982535270842-0.11608247494394919-0.10333498504408542-0.0-0.07578913351330697-0.0-0.11843750797174799-0.0-0.0-0.0-0.08346703205754943-0.0-0.08027375837090767-0.0-0.1199271696208988-0.08021337127667084-0.0-0.0-0.0-0.0-0.1381547418481752
gpt2	ensemble	Prior	fastcompany	21.9736	5		21	0.047329341131527945-0.042982503970982563-0.0656763594767377-0.04323689668090199-0.0540850292468808-0.04611546386746816-0.05455567815623369-0.03905304754073151-0.050824223905280616-0.03781747705611116-0.04105314492534111-0.047856545536545614-0.041975388927805765-0.044993023251721484-0.047087715320248476-0.04458505939527878-0.04330477919639841-0.060499040410490694-0.055054943971907716-0.0477437751…
gpt2	average	Prior	fastcompany	22.8327	5		21	0.047329341131527945-0.042982503970982563-0.0656763594767377-0.04323689668090199-0.0540850292468808-0.04611546386746816-0.05455567815623369-0.03905304754073151-0.050824223905280616-0.03781747705611116-0.04105314492534111-0.047856545536545614-0.041975388927805765-0.044993023251721484-0.047087715320248476-0.04458505939527878-0.04330477919639841-0.060499040410490694-0.055054943971907716-0.0477437751…
gpt2	ensemble	Prior	fastcompany	27.8316	5	70_www.insiderpages.com	1	0.0-0.0-0.0-0.0-0.0-0.0-0.0-0.0-1.0-0.0-0.0-0.0-0.0-0.0-0.0-0.0-0.0-0.0-0.0-0.0-0.0
gpt2	average	Prior	fastcompany	27.9675	5	70_www.insiderpages.com	1	0.0-0.0-0.0-0.0-0.0-0.0-0.0-0.0-1.0-0.0-0.0-0.0-0.0-0.0-0.0-0.0-0.0-0.0-0.0-0.0-0.0
deberta	ensemble	Prior	fastcompany	3.98092	5	45_www.npr.org	1	0.0-0.0-0.0-1.0-0.0-0.0-0.0-0.0-0.0-0.0-0.0-0.0-0.0-0.0-0.0-0.0-0.0-0.0-0.0-0.0-0.0
deberta	ensemble	Prior	fastcompany	3.87479	5	45_www.npr.org-www.frontiersin.org	2	0.0-0.0-0.0-0.4997377523778532-0.0-0.0-0.0-0.0-0.0-0.0-0.0-0.0-0.0-0.0-0.0-0.0-0.0-0.0-0.0-0.5002622476221468-0.0
deberta	ensemble	Prior	fastcompany	3.811	5	45_www.npr.org-60_www.csmonitor.com-www.frontiersin.org	3	0.0-0.0-0.0-0.333313186549344-0.0-0.0-0.0-0.0-0.0-0.0-0.0-0.0-0.0-0.0-0.0-0.3330238010569093-0.0-0.0-0.0-0.3336630123937467-0.0
deberta	ensemble	Prior	fastcompany	3.85969	5	15_www.dailymail.co.uk-45_www.npr.org-37_www.instructables.com-11_link.springer.com-22_forums.macrumors.com-60_www.csmonitor.com-39_www.booking.com-journals.plos.org-www.frontiersin.org	9	0.11130306478600654-0.0-0.0-0.11141355104390703-0.0-0.11067047584505574-0.0-0.1111639120489051-0.0-0.0-0.0-0.11089635824302942-0.0-0.0-0.0-0.1113168208014989-0.0-0.11056678414081354-0.11113854896068437-0.11153048413009942-0.0
deberta	ensemble	Prior	fastcompany	3.83339	5	15_www.dailymail.co.uk-78_www.wired.com-45_www.npr.org-37_www.instructables.com-11_link.springer.com-22_forums.macrumors.com-60_www.csmonitor.com-39_www.booking.com-journals.plos.org-www.frontiersin.org	10	0.10022542822965827-0.09952678821240325-0.0-0.10032491814516831-0.0-0.09965579883425899-0.0-0.1001001249175515-0.0-0.0-0.0-0.09985919988264862-0.0-0.0-0.0-0.10023781515311007-0.0-0.09956242723230428-0.10007728613604051-0.10043021325685621-0.0
deberta	average	Prior	fastcompany	3.94482	5	45_www.npr.org	1	0.0-0.0-0.0-1.0-0.0-0.0-0.0-0.0-0.0-0.0-0.0-0.0-0.0-0.0-0.0-0.0-0.0-0.0-0.0-0.0-0.0
deberta	ensemble	Prior	fastcompany	3.85969	10	45_www.npr.org-www.frontiersin.org	2	0.0-0.0-0.0-0.4997377523778532-0.0-0.0-0.0-0.0-0.0-0.0-0.0-0.0-0.0-0.0-0.0-0.0-0.0-0.0-0.0-0.5002622476221468-0.0
deberta	ensemble	Prior	fastcompany	3.79985	10	45_www.npr.org-60_www.csmonitor.com-www.frontiersin.org	3	0.0-0.0-0.0-0.333313186549344-0.0-0.0-0.0-0.0-0.0-0.0-0.0-0.0-0.0-0.0-0.0-0.3330238010569093-0.0-0.0-0.0-0.3336630123937467-0.0
deberta	ensemble	Prior	fastcompany	3.8484	10	15_www.dailymail.co.uk-45_www.npr.org-37_www.instructables.com-11_link.springer.com-22_forums.macrumors.com-60_www.csmonitor.com-39_www.booking.com-journals.plos.org-www.frontiersin.org	9	0.11130306478600654-0.0-0.0-0.11141355104390703-0.0-0.11067047584505574-0.0-0.1111639120489051-0.0-0.0-0.0-0.11089635824302942-0.0-0.0-0.0-0.1113168208014989-0.0-0.11056678414081354-0.11113854896068437-0.11153048413009942-0.0
deberta	ensemble	Prior	fastcompany	3.82218	10	15_www.dailymail.co.uk-78_www.wired.com-45_www.npr.org-37_www.instructables.com-11_link.springer.com-22_forums.macrumors.com-60_www.csmonitor.com-39_www.booking.com-journals.plos.org-www.frontiersin.org	10	0.10022542822965827-0.09952678821240325-0.0-0.10032491814516831-0.0-0.09965579883425899-0.0-0.1001001249175515-0.0-0.0-0.0-0.09985919988264862-0.0-0.0-0.0-0.10023781515311007-0.0-0.09956242723230428-0.10007728613604051-0.10043021325685621-0.0
deberta	ensemble	Prior	fastcompany	3.93765	10	45_www.npr.org	1	0.0-0.0-0.0-1.0-0.0-0.0-0.0-0.0-0.0-0.0-0.0-0.0-0.0-0.0-0.0-0.0-0.0-0.0-0.0-0.0-0.0
deberta	ensemble	Prior	fastcompany	3.85969	42	45_www.npr.org-www.frontiersin.org	2	0.0-0.0-0.0-0.4997377523778532-0.0-0.0-0.0-0.0-0.0-0.0-0.0-0.0-0.0-0.0-0.0-0.0-0.0-0.0-0.0-0.5002622476221468-0.0
deberta	ensemble	Prior	fastcompany	3.79985	42	45_www.npr.org-60_www.csmonitor.com-www.frontiersin.org	3	0.0-0.0-0.0-0.333313186549344-0.0-0.0-0.0-0.0-0.0-0.0-0.0-0.0-0.0-0.0-0.0-0.3330238010569093-0.0-0.0-0.0-0.3336630123937467-0.0
deberta	average	Sentence Sim	yelp	6.74832	10	70_www.insiderpages.com-39_www.booking.com	2	0.0-0.0-0.0-0.0-0.0-0.0-0.0-0.0-0.546674247988024-0.0-0.0-0.0-0.0-0.0-0.0-0.0-0.0-0.453325752011976-0.0-0.0-0.0
deberta	average	Sentence Sim	yelp	6.77518	42	70_www.insiderpages.com-39_www.booking.com	2	0.0-0.0-0.0-0.0-0.0-0.0-0.0-0.0-0.5549583332925996-0.0-0.0-0.0-0.0-0.0-0.0-0.0-0.0-0.4450416667074004-0.0-0.0-0.0
deberta	average	Sentence Sim	yelp	6.79319	88	70_www.insiderpages.com-39_www.booking.com	2	0.0-0.0-0.0-0.0-0.0-0.0-0.0-0.0-0.5397101443609336-0.0-0.0-0.0-0.0-0.0-0.0-0.0-0.0-0.46028985563906644-0.0-0.0-0.0
deberta	ensemble	Prior	fastcompany	3.8484	42	15_www.dailymail.co.uk-45_www.npr.org-37_www.instructables.com-11_link.springer.com-22_forums.macrumors.com-60_www.csmonitor.com-39_www.booking.com-journals.plos.org-www.frontiersin.org	9	0.11130306478600654-0.0-0.0-0.11141355104390703-0.0-0.11067047584505574-0.0-0.1111639120489051-0.0-0.0-0.0-0.11089635824302942-0.0-0.0-0.0-0.1113168208014989-0.0-0.11056678414081354-0.11113854896068437-0.11153048413009942-0.0
deberta	ensemble	Prior	fastcompany	3.82218	42	15_www.dailymail.co.uk-78_www.wired.com-45_www.npr.org-37_www.instructables.com-11_link.springer.com-22_forums.macrumors.com-60_www.csmonitor.com-39_www.booking.com-journals.plos.org-www.frontiersin.org	10	0.10022542822965827-0.09952678821240325-0.0-0.10032491814516831-0.0-0.09965579883425899-0.0-0.1001001249175515-0.0-0.0-0.0-0.09985919988264862-0.0-0.0-0.0-0.10023781515311007-0.0-0.09956242723230428-0.10007728613604051-0.10043021325685621-0.0
deberta	average	Prior	fastcompany	3.96429	10	45_www.npr.org	1	0.0-0.0-0.0-1.0-0.0-0.0-0.0-0.0-0.0-0.0-0.0-0.0-0.0-0.0-0.0-0.0-0.0-0.0-0.0-0.0-0.0
deberta	ensemble	Prior	fastcompany	3.87858	88	45_www.npr.org-www.frontiersin.org	2	0.0-0.0-0.0-0.4997377523778532-0.0-0.0-0.0-0.0-0.0-0.0-0.0-0.0-0.0-0.0-0.0-0.0-0.0-0.0-0.0-0.5002622476221468-0.0
deberta	ensemble	Prior	fastcompany	3.82218	88	45_www.npr.org-60_www.csmonitor.com-www.frontiersin.org	3	0.0-0.0-0.0-0.333313186549344-0.0-0.0-0.0-0.0-0.0-0.0-0.0-0.0-0.0-0.0-0.0-0.3330238010569093-0.0-0.0-0.0-0.3336630123937467-0.0
deberta	ensemble	Prior	fastcompany	3.87101	88	15_www.dailymail.co.uk-45_www.npr.org-37_www.instructables.com-11_link.springer.com-22_forums.macrumors.com-60_www.csmonitor.com-39_www.booking.com-journals.plos.org-www.frontiersin.org	9	0.11130306478600654-0.0-0.0-0.11141355104390703-0.0-0.11067047584505574-0.0-0.1111639120489051-0.0-0.0-0.0-0.11089635824302942-0.0-0.0-0.0-0.1113168208014989-0.0-0.11056678414081354-0.11113854896068437-0.11153048413009942-0.0
deberta	ensemble	Prior	fastcompany	3.84464	88	15_www.dailymail.co.uk-78_www.wired.com-45_www.npr.org-37_www.instructables.com-11_link.springer.com-22_forums.macrumors.com-60_www.csmonitor.com-39_www.booking.com-journals.plos.org-www.frontiersin.org	10	0.10022542822965827-0.09952678821240325-0.0-0.10032491814516831-0.0-0.09965579883425899-0.0-0.1001001249175515-0.0-0.0-0.0-0.09985919988264862-0.0-0.0-0.0-0.10023781515311007-0.0-0.09956242723230428-0.10007728613604051-0.10043021325685621-0.0
deberta	ensemble	Entropy	fastcompany	3.77028	10	15_www.dailymail.co.uk-78_www.wired.com-45_www.npr.org-91_www.entrepreneur.com-11_link.springer.com-85_www.pcworld.com-60_www.csmonitor.com-journals.plos.org-www.frontiersin.org	9	0.11280797101449275-0.11138586956521739-0.0-0.11293478260869565-0.0-0.0-0.10985507246376812-0.10972826086956522-0.0-0.0-0.0-0.0-0.0-0.0-0.1082427536231884-0.11246376811594203-0.0-0.0-0.11247282608695652-0.11010869565217392-0.0
deberta	ensemble	Entropy	fastcompany	3.77028	42	15_www.dailymail.co.uk-78_www.wired.com-45_www.npr.org-91_www.entrepreneur.com-11_link.springer.com-85_www.pcworld.com-60_www.csmonitor.com-journals.plos.org-www.frontiersin.org	9	0.11284973905479849-0.1113728616990432-0.0-0.11299470861119165-0.0-0.0-0.10990504494056248-0.10969665120324731-0.0-0.0-0.0-0.0-0.0-0.0-0.10821071325021746-0.11240576978834445-0.0-0.0-0.11246919396926645-0.1100953174833285-0.0
deberta	ensemble	Entropy	fastcompany	3.79243	88	15_www.dailymail.co.uk-78_www.wired.com-45_www.npr.org-91_www.entrepreneur.com-11_link.springer.com-85_www.pcworld.com-60_www.csmonitor.com-journals.plos.org-www.frontiersin.org	9	0.11281879437762643-0.11137878568323431-0.0-0.11295464425445588-0.0-0.0-0.10986632372119982-0.10973953050282567-0.0-0.0-0.0-0.0-0.0-0.0-0.10825423851615708-0.11243841472250399-0.0-0.0-0.11246558469786988-0.11008368352412694-0.0
deberta	ensemble	Entropy	fastcompany	3.78503	10	15_www.dailymail.co.uk-78_www.wired.com-45_www.npr.org-37_www.instructables.com-91_www.entrepreneur.com-11_link.springer.com-85_www.pcworld.com-60_www.csmonitor.com-journals.plos.org-www.frontiersin.org	10	0.10155911803737058-0.10044495539801154-0.0-0.10165847011986119-0.0-0.09793276702646314-0.0992456338308034-0.09914628174831279-0.0-0.0-0.0-0.0-0.0-0.0-0.09798244306770844-0.10128944809918176-0.0-0.0-0.10129654467650252-0.09944433799578463-0.0
deberta	ensemble	Entropy	fastcompany	3.78503	42	15_www.dailymail.co.uk-78_www.wired.com-45_www.npr.org-37_www.instructables.com-91_www.entrepreneur.com-11_link.springer.com-85_www.pcworld.com-60_www.csmonitor.com-journals.plos.org-www.frontiersin.org	10	0.10159216905527517-0.10043513135572166-0.0-0.10170574330799208-0.0-0.09792939940515485-0.09928519204696296-0.09912192905868239-0.0-0.0-0.0-0.0-0.0-0.0-0.09795779296833408-0.10124434790632963-0.0-0.0-0.10129403664189328-0.0994342582536539-0.0
deberta	ensemble	Entropy	fastcompany	3.80728	88	15_www.dailymail.co.uk-78_www.wired.com-45_www.npr.org-37_www.instructables.com-91_www.entrepreneur.com-11_link.springer.com-85_www.pcworld.com-60_www.csmonitor.com-journals.plos.org-www.frontiersin.org	10	0.10156560495088855-0.10043717708510759-0.0-0.10167206040992449-0.0-0.097953216374269-0.09925197297450747-0.09915261454607392-0.0-0.0-0.0-0.0-0.0-0.0-0.09798870152728098-0.10126752966558791-0.0-0.0-0.1012888207573951-0.09942230170896497-0.0
deberta	ensemble	Entropy-topk-uniform	fastcompany	3.71182	10	15_www.dailymail.co.uk-78_www.wired.com-45_www.npr.org-60_www.csmonitor.com-journals.plos.org	5	0.2-0.2-0.0-0.2-0.0-0.0-0.0-0.0-0.0-0.0-0.0-0.0-0.0-0.0-0.0-0.2-0.0-0.0-0.2-0.0-0.0
deberta	ensemble	Entropy-topk-uniform	fastcompany	3.73364	10	15_www.dailymail.co.uk-78_www.wired.com-45_www.npr.org-60_www.csmonitor.com-journals.plos.org-www.frontiersin.org	6	0.16666666666666666-0.16666666666666666-0.0-0.16666666666666666-0.0-0.0-0.0-0.0-0.0-0.0-0.0-0.0-0.0-0.0-0.0-0.16666666666666666-0.0-0.0-0.16666666666666666-0.16666666666666666-0.0
deberta	ensemble	Entropy-topk-uniform	fastcompany	3.73728	10	15_www.dailymail.co.uk-78_www.wired.com-45_www.npr.org-91_www.entrepreneur.com-60_www.csmonitor.com-journals.plos.org-www.frontiersin.org	7	0.14285714285714285-0.14285714285714285-0.0-0.14285714285714285-0.0-0.0-0.14285714285714285-0.0-0.0-0.0-0.0-0.0-0.0-0.0-0.0-0.14285714285714285-0.0-0.0-0.14285714285714285-0.14285714285714285-0.0
deberta	ensemble	Entropy-topk-uniform	fastcompany	3.75925	10	15_www.dailymail.co.uk-78_www.wired.com-45_www.npr.org-91_www.entrepreneur.com-11_link.springer.com-60_www.csmonitor.com-journals.plos.org-www.frontiersin.org	8	0.125-0.125-0.0-0.125-0.0-0.0-0.125-0.125-0.0-0.0-0.0-0.0-0.0-0.0-0.0-0.125-0.0-0.0-0.125-0.125-0.0
deberta	ensemble	Entropy-topk-uniform	fastcompany	3.77396	10	15_www.dailymail.co.uk-78_www.wired.com-45_www.npr.org-91_www.entrepreneur.com-11_link.springer.com-85_www.pcworld.com-60_www.csmonitor.com-journals.plos.org-www.frontiersin.org	9	0.1111111111111111-0.1111111111111111-0.0-0.1111111111111111-0.0-0.0-0.1111111111111111-0.1111111111111111-0.0-0.0-0.0-0.0-0.0-0.0-0.1111111111111111-0.1111111111111111-0.0-0.0-0.1111111111111111-0.1111111111111111-0.0
deberta	ensemble	Entropy-topk-uniform	fastcompany	3.78873	10	15_www.dailymail.co.uk-78_www.wired.com-45_www.npr.org-37_www.instructables.com-91_www.entrepreneur.com-11_link.springer.com-85_www.pcworld.com-60_www.csmonitor.com-journals.plos.org-www.frontiersin.org	10	0.1-0.1-0.0-0.1-0.0-0.1-0.1-0.1-0.0-0.0-0.0-0.0-0.0-0.0-0.1-0.1-0.0-0.0-0.1-0.1-0.0
gpt2	average	Sentence Sim	fastcompany	21.8705	10	91_www.entrepreneur.com-10_www.eventbrite.com	2	0.0-0.0-0.0-0.0-0.0-0.0-0.5320993899877223-0.0-0.0-0.0-0.4679006100122778-0.0-0.0-0.0-0.0-0.0-0.0-0.0-0.0-0.0-0.0
gpt2	ensemble	Sentence Sim	fastcompany	21.5908	10	91_www.entrepreneur.com-10_www.eventbrite.com	2	0.0-0.0-0.0-0.0-0.0-0.0-0.5320993899877223-0.0-0.0-0.0-0.4679006100122778-0.0-0.0-0.0-0.0-0.0-0.0-0.0-0.0-0.0-0.0
gpt2	average	Sentence Sim	fastcompany	21.5587	10	78_www.wired.com-91_www.entrepreneur.com-10_www.eventbrite.com	3	0.0-0.3113501211574464-0.0-0.0-0.0-0.0-0.3664301804472416-0.0-0.0-0.0-0.322219698395312-0.0-0.0-0.0-0.0-0.0-0.0-0.0-0.0-0.0-0.0
gpt2	ensemble	Sentence Sim	fastcompany	21.2146	10	78_www.wired.com-91_www.entrepreneur.com-10_www.eventbrite.com	3	0.0-0.3113501211574464-0.0-0.0-0.0-0.0-0.3664301804472416-0.0-0.0-0.0-0.322219698395312-0.0-0.0-0.0-0.0-0.0-0.0-0.0-0.0-0.0-0.0
gpt2	average	Sentence Sim	fastcompany	21.442	10	78_www.wired.com-91_www.entrepreneur.com-10_www.eventbrite.com-58_medium.com	4	0.0-0.23844213293180705-0.0-0.0-0.0-0.0-0.28062424858426166-0.0-0.0-0.0-0.2467664116281788-0.0-0.0-0.0-0.0-0.0-0.0-0.0-0.0-0.0-0.23416720685575246
gpt2	ensemble	Sentence Sim	fastcompany	21.0084	10	78_www.wired.com-91_www.entrepreneur.com-10_www.eventbrite.com-58_medium.com	4	0.0-0.23844213293180705-0.0-0.0-0.0-0.0-0.28062424858426166-0.0-0.0-0.0-0.2467664116281788-0.0-0.0-0.0-0.0-0.0-0.0-0.0-0.0-0.0-0.23416720685575246
gpt2	average	Sentence Sim	fastcompany	21.8277	10	78_www.wired.com-91_www.entrepreneur.com-10_www.eventbrite.com-84_www.glassdoor.com-58_medium.com	5	0.0-0.19891644278697918-0.0-0.0-0.0-0.0-0.23410618166259525-0.0-0.0-0.0-0.20586083590530133-0.0-0.0-0.16576638389714451-0.0-0.0-0.0-0.0-0.0-0.0-0.19535015574797976
gpt2	ensemble	Sentence Sim	fastcompany	21.2146	10	78_www.wired.com-91_www.entrepreneur.com-10_www.eventbrite.com-84_www.glassdoor.com-58_medium.com	5	0.0-0.19891644278697918-0.0-0.0-0.0-0.0-0.23410618166259525-0.0-0.0-0.0-0.20586083590530133-0.0-0.0-0.16576638389714451-0.0-0.0-0.0-0.0-0.0-0.0-0.19535015574797976
gpt2	average	Sentence Sim	fastcompany	21.753	10	78_www.wired.com-91_www.entrepreneur.com-10_www.eventbrite.com-84_www.glassdoor.com-85_www.pcworld.com-58_medium.com	6	0.0-0.17090504133673737-0.0-0.0-0.0-0.0-0.2011393633108474-0.0-0.0-0.0-0.17687152543587437-0.0-0.0-0.14242317173609453-0.140819939557432-0.0-0.0-0.0-0.0-0.0-0.16784095862301432
gpt2	ensemble	Sentence Sim	fastcompany	21.1732	10	78_www.wired.com-91_www.entrepreneur.com-10_www.eventbrite.com-84_www.glassdoor.com-85_www.pcworld.com-58_medium.com	6	0.0-0.17090504133673737-0.0-0.0-0.0-0.0-0.2011393633108474-0.0-0.0-0.0-0.17687152543587437-0.0-0.0-0.14242317173609453-0.140819939557432-0.0-0.0-0.0-0.0-0.0-0.16784095862301432
gpt2	average	Sentence Sim	fastcompany	21.8045	10	78_www.wired.com-91_www.entrepreneur.com-10_www.eventbrite.com-84_www.glassdoor.com-85_www.pcworld.com-60_www.csmonitor.com-58_medium.com	7	0.0-0.15081153950679974-0.0-0.0-0.0-0.0-0.17749117755138943-0.0-0.0-0.0-0.15607653722363576-0.0-0.0-0.12567831599912352-0.12426357766747567-0.11757114753769642-0.0-0.0-0.0-0.0-0.1481077045138795
gpt2	ensemble	Sentence Sim	fastcompany	21.2146	10	78_www.wired.com-91_www.entrepreneur.com-10_www.eventbrite.com-84_www.glassdoor.com-85_www.pcworld.com-60_www.csmonitor.com-58_medium.com	7	0.0-0.15081153950679974-0.0-0.0-0.0-0.0-0.17749117755138943-0.0-0.0-0.0-0.15607653722363576-0.0-0.0-0.12567831599912352-0.12426357766747567-0.11757114753769642-0.0-0.0-0.0-0.0-0.1481077045138795
gpt2	average	Sentence Sim	fastcompany	21.9342	10	78_www.wired.com-91_www.entrepreneur.com-10_www.eventbrite.com-77_www.androidheadlines.com-84_www.glassdoor.com-85_www.pcworld.com-60_www.csmonitor.com-58_medium.com	8	0.0-0.1350239413265739-0.0-0.0-0.0-0.0-0.15891064053890097-0.0-0.0-0.0-0.13973777652199382-0.0-0.10468428498148195-0.11252177135107853-0.11125513389011514-0.10526329602326036-0.0-0.0-0.0-0.0-0.13260315536659542
gpt2	ensemble	Sentence Sim	fastcompany	21.2976	10	78_www.wired.com-91_www.entrepreneur.com-10_www.eventbrite.com-77_www.androidheadlines.com-84_www.glassdoor.com-85_www.pcworld.com-60_www.csmonitor.com-58_medium.com	8	0.0-0.1350239413265739-0.0-0.0-0.0-0.0-0.15891064053890097-0.0-0.0-0.0-0.13973777652199382-0.0-0.10468428498148195-0.11252177135107853-0.11125513389011514-0.10526329602326036-0.0-0.0-0.0-0.0-0.13260315536659542
gpt2	average	Sentence Sim	fastcompany	22.0318	10	78_www.wired.com-45_www.npr.org-91_www.entrepreneur.com-10_www.eventbrite.com-77_www.androidheadlines.com-84_www.glassdoor.com-85_www.pcworld.com-60_www.csmonitor.com-58_medium.com	9	0.0-0.12273461799235619-0.0-0.09101588365350909-0.0-0.0-0.14444724816830773-0.0-0.0-0.0-0.12701941931206795-0.0-0.09515635227925658-0.102280502901302-0.10112914956811683-0.09568266411942239-0.0-0.0-0.0-0.0-0.12053416200566117
gpt2	ensemble	Sentence Sim	fastcompany	21.3809	10	78_www.wired.com-45_www.npr.org-91_www.entrepreneur.com-10_www.eventbrite.com-77_www.androidheadlines.com-84_www.glassdoor.com-85_www.pcworld.com-60_www.csmonitor.com-58_medium.com	9	0.0-0.12273461799235619-0.0-0.09101588365350909-0.0-0.0-0.14444724816830773-0.0-0.0-0.0-0.12701941931206795-0.0-0.09515635227925658-0.102280502901302-0.10112914956811683-0.09568266411942239-0.0-0.0-0.0-0.0-0.12053416200566117
gpt2	average	Sentence Sim	fastcompany	22.2135	10	78_www.wired.com-45_www.npr.org-91_www.entrepreneur.com-70_www.insiderpages.com-10_www.eventbrite.com-77_www.androidheadlines.com-84_www.glassdoor.com-85_www.pcworld.com-60_www.csmonitor.com-58_medium.com	10	0.0-0.11430966549647381-0.0-0.08476822094273806-0.0-0.0-0.13453186142669002-0.0-0.0686436527337957-0.0-0.11830034240236198-0.0-0.08862447267798457-0.09525959557870703-0.09418727534389892-0.08911465655096434-0.0-0.0-0.0-0.0-0.11226025684638549
gpt2	ensemble	Sentence Sim	fastcompany	21.5066	10	78_www.wired.com-45_www.npr.org-91_www.entrepreneur.com-70_www.insiderpages.com-10_www.eventbrite.com-77_www.androidheadlines.com-84_www.glassdoor.com-85_www.pcworld.com-60_www.csmonitor.com-58_medium.com	10	0.0-0.11430966549647381-0.0-0.08476822094273806-0.0-0.0-0.13453186142669002-0.0-0.0686436527337957-0.0-0.11830034240236198-0.0-0.08862447267798457-0.09525959557870703-0.09418727534389892-0.08911465655096434-0.0-0.0-0.0-0.0-0.11226025684638549
gpt2	average	Sentence Sim	fastcompany	21.656	42	91_www.entrepreneur.com	1	0.0-0.0-0.0-0.0-0.0-0.0-1.0-0.0-0.0-0.0-0.0-0.0-0.0-0.0-0.0-0.0-0.0-0.0-0.0-0.0-0.0
gpt2	ensemble	Sentence Sim	fastcompany	21.5486	42	91_www.entrepreneur.com	1	0.0-0.0-0.0-0.0-0.0-0.0-1.0-0.0-0.0-0.0-0.0-0.0-0.0-0.0-0.0-0.0-0.0-0.0-0.0-0.0-0.0
gpt2	average	Sentence Sim	fastcompany	21.2813	42	78_www.wired.com-91_www.entrepreneur.com	2	0.0-0.4561792483346165-0.0-0.0-0.0-0.0-0.5438207516653836-0.0-0.0-0.0-0.0-0.0-0.0-0.0-0.0-0.0-0.0-0.0-0.0-0.0-0.0
gpt2	ensemble	Sentence Sim	fastcompany	21.0495	42	78_www.wired.com-91_www.entrepreneur.com	2	0.0-0.4561792483346165-0.0-0.0-0.0-0.0-0.5438207516653836-0.0-0.0-0.0-0.0-0.0-0.0-0.0-0.0-0.0-0.0-0.0-0.0-0.0-0.0
gpt2	average	Sentence Sim	fastcompany	21.5379	42	78_www.wired.com-91_www.entrepreneur.com-10_www.eventbrite.com	3	0.0-0.3165029410547131-0.0-0.0-0.0-0.0-0.37730972624696113-0.0-0.0-0.0-0.30618733269832576-0.0-0.0-0.0-0.0-0.0-0.0-0.0-0.0-0.0-0.0
gpt2	ensemble	Sentence Sim	fastcompany	21.1732	42	78_www.wired.com-91_www.entrepreneur.com-10_www.eventbrite.com	3	0.0-0.3165029410547131-0.0-0.0-0.0-0.0-0.37730972624696113-0.0-0.0-0.0-0.30618733269832576-0.0-0.0-0.0-0.0-0.0-0.0-0.0-0.0-0.0-0.0
gpt2	average	Sentence Sim	fastcompany	22.0965	42	78_www.wired.com-91_www.entrepreneur.com-10_www.eventbrite.com-84_www.glassdoor.com	4	0.0-0.2442250503401816-0.0-0.0-0.0-0.0-0.2911457523251727-0.0-0.0-0.0-0.23626515599691614-0.0-0.0-0.22836404133772953-0.0-0.0-0.0-0.0-0.0-0.0-0.0
gpt2	ensemble	Sentence Sim	fastcompany	21.4646	42	78_www.wired.com-91_www.entrepreneur.com-10_www.eventbrite.com-84_www.glassdoor.com	4	0.0-0.2442250503401816-0.0-0.0-0.0-0.0-0.2911457523251727-0.0-0.0-0.0-0.23626515599691614-0.0-0.0-0.22836404133772953-0.0-0.0-0.0-0.0-0.0-0.0-0.0
gpt2	average	Sentence Sim	fastcompany	21.8764	42	78_www.wired.com-91_www.entrepreneur.com-10_www.eventbrite.com-84_www.glassdoor.com-58_medium.com	5	0.0-0.19882773157187258-0.0-0.0-0.0-0.0-0.23702666622841606-0.0-0.0-0.0-0.19234744736835302-0.0-0.0-0.18591501669677715-0.0-0.0-0.0-0.0-0.0-0.0-0.18588313813458116
gpt2	ensemble	Sentence Sim	fastcompany	21.2146	42	78_www.wired.com-91_www.entrepreneur.com-10_www.eventbrite.com-84_www.glassdoor.com-58_medium.com	5	0.0-0.19882773157187258-0.0-0.0-0.0-0.0-0.23702666622841606-0.0-0.0-0.0-0.19234744736835302-0.0-0.0-0.18591501669677715-0.0-0.0-0.0-0.0-0.0-0.0-0.18588313813458116
gpt2	average	Sentence Sim	fastcompany	21.7899	42	78_www.wired.com-91_www.entrepreneur.com-10_www.eventbrite.com-84_www.glassdoor.com-85_www.pcworld.com-58_medium.com	6	0.0-0.17029218968454038-0.0-0.0-0.0-0.0-0.20300885438142666-0.0-0.0-0.0-0.16474194889030502-0.0-0.0-0.15923269374064958-0.14351892294771323-0.0-0.0-0.0-0.0-0.0-0.15920539035536507
gpt2	ensemble	Sentence Sim	fastcompany	21.1732	42	78_www.wired.com-91_www.entrepreneur.com-10_www.eventbrite.com-84_www.glassdoor.com-85_www.pcworld.com-58_medium.com	6	0.0-0.17029218968454038-0.0-0.0-0.0-0.0-0.20300885438142666-0.0-0.0-0.0-0.16474194889030502-0.0-0.0-0.15923269374064958-0.14351892294771323-0.0-0.0-0.0-0.0-0.0-0.15920539035536507
gpt2	average	Sentence Sim	fastcompany	21.9322	42	78_www.wired.com-45_www.npr.org-91_www.entrepreneur.com-10_www.eventbrite.com-84_www.glassdoor.com-85_www.pcworld.com-58_medium.com	7	0.0-0.1496198910564274-0.0-0.12139311066706956-0.0-0.0-0.17836497805510712-0.0-0.0-0.0-0.1447434112571555-0.0-0.0-0.1399029417275753-0.12609671445150286-0.0-0.0-0.0-0.0-0.0-0.13987895278516224
gpt2	ensemble	Sentence Sim	fastcompany	21.2976	42	78_www.wired.com-45_www.npr.org-91_www.entrepreneur.com-10_www.eventbrite.com-84_www.glassdoor.com-85_www.pcworld.com-58_medium.com	7	0.0-0.1496198910564274-0.0-0.12139311066706956-0.0-0.0-0.17836497805510712-0.0-0.0-0.0-0.1447434112571555-0.0-0.0-0.1399029417275753-0.12609671445150286-0.0-0.0-0.0-0.0-0.0-0.13987895278516224
gpt2	average	Sentence Sim	fastcompany	22.0568	42	78_www.wired.com-45_www.npr.org-91_www.entrepreneur.com-10_www.eventbrite.com-77_www.androidheadlines.com-84_www.glassdoor.com-85_www.pcworld.com-58_medium.com	8	0.0-0.13368569621477658-0.0-0.10846500689593618-0.0-0.0-0.15936949360989403-0.0-0.0-0.0-0.1293285509686469-0.0-0.10649783748098986-0.1250035809763596-0.11266768704895992-0.0-0.0-0.0-0.0-0.0-0.12498214680443698
gpt2	ensemble	Sentence Sim	fastcompany	21.3809	42	78_www.wired.com-45_www.npr.org-91_www.entrepreneur.com-10_www.eventbrite.com-77_www.androidheadlines.com-84_www.glassdoor.com-85_www.pcworld.com-58_medium.com	8	0.0-0.13368569621477658-0.0-0.10846500689593618-0.0-0.0-0.15936949360989403-0.0-0.0-0.0-0.1293285509686469-0.0-0.10649783748098986-0.1250035809763596-0.11266768704895992-0.0-0.0-0.0-0.0-0.0-0.12498214680443698
gpt2	average	Sentence Sim	fastcompany	22.0732	42	78_www.wired.com-45_www.npr.org-91_www.entrepreneur.com-10_www.eventbrite.com-77_www.androidheadlines.com-84_www.glassdoor.com-85_www.pcworld.com-60_www.csmonitor.com-58_medium.com	9	0.0-0.12126557355771644-0.0-0.0983880223883184-0.0-0.0-0.14456320756379076-0.0-0.0-0.0-0.11731323061971564-0.0-0.09660361362849555-0.11339007368083097-0.10220025087398435-0.09290539682799143-0.0-0.0-0.0-0.0-0.11337063085915648
gpt2	ensemble	Sentence Sim	fastcompany	21.4227	42	78_www.wired.com-45_www.npr.org-91_www.entrepreneur.com-10_www.eventbrite.com-77_www.androidheadlines.com-84_www.glassdoor.com-85_www.pcworld.com-60_www.csmonitor.com-58_medium.com	9	0.0-0.12126557355771644-0.0-0.0983880223883184-0.0-0.0-0.14456320756379076-0.0-0.0-0.0-0.11731323061971564-0.0-0.09660361362849555-0.11339007368083097-0.10220025087398435-0.09290539682799143-0.0-0.0-0.0-0.0-0.11337063085915648
gpt2	average	Sentence Sim	fastcompany	22.1864	42	78_www.wired.com-45_www.npr.org-81_www.librarything.com-91_www.entrepreneur.com-10_www.eventbrite.com-77_www.androidheadlines.com-84_www.glassdoor.com-85_www.pcworld.com-60_www.csmonitor.com-58_medium.com	10	0.0-0.1126534166324825-0.0-0.09140060573318387-0.07101897655343203-0.0-0.134296476515329-0.0-0.0-0.0-0.1089817650449267-0.0-0.08974292385723663-0.10533722669670009-0.09494209365340998-0.086307350628977-0.0-0.0-0.0-0.0-0.10531916468432226
gpt2	ensemble	Sentence Sim	fastcompany	21.4646	42	78_www.wired.com-45_www.npr.org-81_www.librarything.com-91_www.entrepreneur.com-10_www.eventbrite.com-77_www.androidheadlines.com-84_www.glassdoor.com-85_www.pcworld.com-60_www.csmonitor.com-58_medium.com	10	0.0-0.1126534166324825-0.0-0.09140060573318387-0.07101897655343203-0.0-0.134296476515329-0.0-0.0-0.0-0.1089817650449267-0.0-0.08974292385723663-0.10533722669670009-0.09494209365340998-0.086307350628977-0.0-0.0-0.0-0.0-0.10531916468432226
gpt2	average	tfidf-topk-uniform	fastcompany	22.0803	5	15_www.dailymail.co.uk-78_www.wired.com-17_www.express.co.uk-81_www.librarything.com-91_www.entrepreneur.com-100_www.ign.com-10_www.eventbrite.com-85_www.pcworld.com-99_www.lonelyplanet.com-58_medium.com	10	0.1-0.1-0.1-0.0-0.1-0.0-0.1-0.0-0.0-0.1-0.1-0.0-0.0-0.0-0.1-0.0-0.1-0.0-0.0-0.0-0.1
gpt2	ensemble	tfidf-topk-uniform	fastcompany	21.4646	5	15_www.dailymail.co.uk-78_www.wired.com-17_www.express.co.uk-81_www.librarything.com-91_www.entrepreneur.com-100_www.ign.com-10_www.eventbrite.com-85_www.pcworld.com-99_www.lonelyplanet.com-58_medium.com	10	0.1-0.1-0.1-0.0-0.1-0.0-0.1-0.0-0.0-0.1-0.1-0.0-0.0-0.0-0.1-0.0-0.1-0.0-0.0-0.0-0.1
gpt2	average	tfidf-topk-uniform	fastcompany	22.0556	10	15_www.dailymail.co.uk-78_www.wired.com-17_www.express.co.uk-91_www.entrepreneur.com-100_www.ign.com-10_www.eventbrite.com-77_www.androidheadlines.com-85_www.pcworld.com-99_www.lonelyplanet.com-58_medium.com	10	0.1-0.1-0.1-0.0-0.0-0.0-0.1-0.0-0.0-0.1-0.1-0.0-0.1-0.0-0.1-0.0-0.1-0.0-0.0-0.0-0.1
gpt2	ensemble	tfidf-topk-uniform	fastcompany	21.4646	10	15_www.dailymail.co.uk-78_www.wired.com-17_www.express.co.uk-91_www.entrepreneur.com-100_www.ign.com-10_www.eventbrite.com-77_www.androidheadlines.com-85_www.pcworld.com-99_www.lonelyplanet.com-58_medium.com	10	0.1-0.1-0.1-0.0-0.0-0.0-0.1-0.0-0.0-0.1-0.1-0.0-0.1-0.0-0.1-0.0-0.1-0.0-0.0-0.0-0.1
gpt2	average	Sentence Sim-topk-uniform	fastcompany	22.1569	5	15_www.dailymail.co.uk-78_www.wired.com-45_www.npr.org-91_www.entrepreneur.com-10_www.eventbrite.com-77_www.androidheadlines.com-84_www.glassdoor.com-85_www.pcworld.com-60_www.csmonitor.com-58_medium.com	10	0.1-0.1-0.0-0.1-0.0-0.0-0.1-0.0-0.0-0.0-0.1-0.0-0.1-0.1-0.1-0.1-0.0-0.0-0.0-0.0-0.1
gpt2	ensemble	Sentence Sim-topk-uniform	fastcompany	21.4646	5	15_www.dailymail.co.uk-78_www.wired.com-45_www.npr.org-91_www.entrepreneur.com-10_www.eventbrite.com-77_www.androidheadlines.com-84_www.glassdoor.com-85_www.pcworld.com-60_www.csmonitor.com-58_medium.com	10	0.1-0.1-0.0-0.1-0.0-0.0-0.1-0.0-0.0-0.0-0.1-0.0-0.1-0.1-0.1-0.1-0.0-0.0-0.0-0.0-0.1
gpt2	average	Sentence Sim-topk-uniform	fastcompany	22.4268	10	78_www.wired.com-45_www.npr.org-91_www.entrepreneur.com-70_www.insiderpages.com-10_www.eventbrite.com-77_www.androidheadlines.com-84_www.glassdoor.com-85_www.pcworld.com-60_www.csmonitor.com-58_medium.com	10	0.0-0.1-0.0-0.1-0.0-0.0-0.1-0.0-0.1-0.0-0.1-0.0-0.1-0.1-0.1-0.1-0.0-0.0-0.0-0.0-0.1
gpt2	ensemble	Sentence Sim-topk-uniform	fastcompany	21.633	10	78_www.wired.com-45_www.npr.org-91_www.entrepreneur.com-70_www.insiderpages.com-10_www.eventbrite.com-77_www.androidheadlines.com-84_www.glassdoor.com-85_www.pcworld.com-60_www.csmonitor.com-58_medium.com	10	0.0-0.1-0.0-0.1-0.0-0.0-0.1-0.0-0.1-0.0-0.1-0.0-0.1-0.1-0.1-0.1-0.0-0.0-0.0-0.0-0.1
gpt2	average	tfidf-topk-uniform	fastcompany	22.0317	42	15_www.dailymail.co.uk-78_www.wired.com-17_www.express.co.uk-91_www.entrepreneur.com-10_www.eventbrite.com-77_www.androidheadlines.com-85_www.pcworld.com-60_www.csmonitor.com-99_www.lonelyplanet.com-58_medium.com	10	0.1-0.1-0.1-0.0-0.0-0.0-0.1-0.0-0.0-0.0-0.1-0.0-0.1-0.0-0.1-0.1-0.1-0.0-0.0-0.0-0.1
gpt2	ensemble	tfidf-topk-uniform	fastcompany	21.4646	42	15_www.dailymail.co.uk-78_www.wired.com-17_www.express.co.uk-91_www.entrepreneur.com-10_www.eventbrite.com-77_www.androidheadlines.com-85_www.pcworld.com-60_www.csmonitor.com-99_www.lonelyplanet.com-58_medium.com	10	0.1-0.1-0.1-0.0-0.0-0.0-0.1-0.0-0.0-0.0-0.1-0.0-0.1-0.0-0.1-0.1-0.1-0.0-0.0-0.0-0.1
gpt2	average	Sentence Sim-topk-uniform	fastcompany	22.3045	42	78_www.wired.com-45_www.npr.org-81_www.librarything.com-91_www.entrepreneur.com-10_www.eventbrite.com-77_www.androidheadlines.com-84_www.glassdoor.com-85_www.pcworld.com-60_www.csmonitor.com-58_medium.com	10	0.0-0.1-0.0-0.1-0.1-0.0-0.1-0.0-0.0-0.0-0.1-0.0-0.1-0.1-0.1-0.1-0.0-0.0-0.0-0.0-0.1
gpt2	ensemble	Sentence Sim-topk-uniform	fastcompany	21.5486	42	78_www.wired.com-45_www.npr.org-81_www.librarything.com-91_www.entrepreneur.com-10_www.eventbrite.com-77_www.androidheadlines.com-84_www.glassdoor.com-85_www.pcworld.com-60_www.csmonitor.com-58_medium.com	10	0.0-0.1-0.0-0.1-0.1-0.0-0.1-0.0-0.0-0.0-0.1-0.0-0.1-0.1-0.1-0.1-0.0-0.0-0.0-0.0-0.1
gpt2	average	tfidf-topk-uniform	fastcompany	21.8672	88	15_www.dailymail.co.uk-78_www.wired.com-17_www.express.co.uk-91_www.entrepreneur.com-10_www.eventbrite.com-85_www.pcworld.com-99_www.lonelyplanet.com-58_medium.com	10	0.125-0.125-0.125-0.0-0.0-0.0-0.125-0.0-0.0-0.0-0.125-0.0-0.0-0.0-0.125-0.0-0.125-0.0-0.0-0.0-0.125
gpt2	ensemble	tfidf-topk-uniform	fastcompany	21.2976	88	15_www.dailymail.co.uk-78_www.wired.com-17_www.express.co.uk-91_www.entrepreneur.com-10_www.eventbrite.com-85_www.pcworld.com-99_www.lonelyplanet.com-58_medium.com	10	0.125-0.125-0.125-0.0-0.0-0.0-0.125-0.0-0.0-0.0-0.125-0.0-0.0-0.0-0.125-0.0-0.125-0.0-0.0-0.0-0.125
gpt2	average	Sentence Sim-topk-uniform	fastcompany	22.4268	88	78_www.wired.com-45_www.npr.org-91_www.entrepreneur.com-70_www.insiderpages.com-10_www.eventbrite.com-77_www.androidheadlines.com-84_www.glassdoor.com-85_www.pcworld.com-60_www.csmonitor.com-58_medium.com	10	0.0-0.1-0.0-0.1-0.0-0.0-0.1-0.0-0.1-0.0-0.1-0.0-0.1-0.1-0.1-0.1-0.0-0.0-0.0-0.0-0.1
gpt2	ensemble	Sentence Sim-topk-uniform	fastcompany	21.633	88	78_www.wired.com-45_www.npr.org-91_www.entrepreneur.com-70_www.insiderpages.com-10_www.eventbrite.com-77_www.androidheadlines.com-84_www.glassdoor.com-85_www.pcworld.com-60_www.csmonitor.com-58_medium.com	10	0.0-0.1-0.0-0.1-0.0-0.0-0.1-0.0-0.1-0.0-0.1-0.0-0.1-0.1-0.1-0.1-0.0-0.0-0.0-0.0-0.1
deberta	ensemble	tfidf-topk-uniform	fastcompany	3.96281	5	78_www.wired.com-17_www.express.co.uk-91_www.entrepreneur.com-85_www.pcworld.com-58_medium.com	5	0.0-0.2-0.2-0.0-0.0-0.0-0.2-0.0-0.0-0.0-0.0-0.0-0.0-0.0-0.2-0.0-0.0-0.0-0.0-0.0-0.2
deberta	ensemble	Sentence Sim-topk-uniform	fastcompany	4.02129	5	78_www.wired.com-91_www.entrepreneur.com-10_www.eventbrite.com-85_www.pcworld.com-58_medium.com	5	0.0-0.2-0.0-0.0-0.0-0.0-0.2-0.0-0.0-0.0-0.2-0.0-0.0-0.0-0.2-0.0-0.0-0.0-0.0-0.0-0.2
gpt2	average	Sentence Sim	fastcompany	21.656	88	91_www.entrepreneur.com	1	0.0-0.0-0.0-0.0-0.0-0.0-1.0-0.0-0.0-0.0-0.0-0.0-0.0-0.0-0.0-0.0-0.0-0.0-0.0-0.0-0.0
gpt2	ensemble	Sentence Sim	fastcompany	21.5486	88	91_www.entrepreneur.com	1	0.0-0.0-0.0-0.0-0.0-0.0-1.0-0.0-0.0-0.0-0.0-0.0-0.0-0.0-0.0-0.0-0.0-0.0-0.0-0.0-0.0
gpt2	average	Sentence Sim	fastcompany	21.8775	88	91_www.entrepreneur.com-10_www.eventbrite.com	2	0.0-0.0-0.0-0.0-0.0-0.0-0.5267146838057284-0.0-0.0-0.0-0.4732853161942716-0.0-0.0-0.0-0.0-0.0-0.0-0.0-0.0-0.0-0.0
gpt2	ensemble	Sentence Sim	fastcompany	21.5908	88	91_www.entrepreneur.com-10_www.eventbrite.com	2	0.0-0.0-0.0-0.0-0.0-0.0-0.5267146838057284-0.0-0.0-0.0-0.4732853161942716-0.0-0.0-0.0-0.0-0.0-0.0-0.0-0.0-0.0-0.0
gpt2	average	Sentence Sim	fastcompany	21.5786	88	91_www.entrepreneur.com-10_www.eventbrite.com-58_medium.com	3	0.0-0.0-0.0-0.0-0.0-0.0-0.35866256561218096-0.0-0.0-0.0-0.32228022303517107-0.0-0.0-0.0-0.0-0.0-0.0-0.0-0.0-0.0-0.319057211352648
gpt2	ensemble	Sentence Sim	fastcompany	21.2146	88	91_www.entrepreneur.com-10_www.eventbrite.com-58_medium.com	3	0.0-0.0-0.0-0.0-0.0-0.0-0.35866256561218096-0.0-0.0-0.0-0.32228022303517107-0.0-0.0-0.0-0.0-0.0-0.0-0.0-0.0-0.0-0.319057211352648
gpt2	average	Sentence Sim	fastcompany	21.4411	88	78_www.wired.com-91_www.entrepreneur.com-10_www.eventbrite.com-58_medium.com	4	0.0-0.23422297392741123-0.0-0.0-0.0-0.0-0.2746555528580607-0.0-0.0-0.0-0.24679479075788394-0.0-0.0-0.0-0.0-0.0-0.0-0.0-0.0-0.0-0.24432668245664418
gpt2	ensemble	Sentence Sim	fastcompany	21.0084	88	78_www.wired.com-91_www.entrepreneur.com-10_www.eventbrite.com-58_medium.com	4	0.0-0.23422297392741123-0.0-0.0-0.0-0.0-0.2746555528580607-0.0-0.0-0.0-0.24679479075788394-0.0-0.0-0.0-0.0-0.0-0.0-0.0-0.0-0.0-0.24432668245664418
gpt2	average	Sentence Sim	fastcompany	21.4457	88	78_www.wired.com-91_www.entrepreneur.com-10_www.eventbrite.com-85_www.pcworld.com-58_medium.com	5	0.0-0.19293492061472747-0.0-0.0-0.0-0.0-0.2262401778891533-0.0-0.0-0.0-0.2032906190396047-0.0-0.0-0.0-0.17627670172730142-0.0-0.0-0.0-0.0-0.0-0.20125758072921324
gpt2	ensemble	Sentence Sim	fastcompany	21.0084	88	78_www.wired.com-91_www.entrepreneur.com-10_www.eventbrite.com-85_www.pcworld.com-58_medium.com	5	0.0-0.19293492061472747-0.0-0.0-0.0-0.0-0.2262401778891533-0.0-0.0-0.0-0.2032906190396047-0.0-0.0-0.0-0.17627670172730142-0.0-0.0-0.0-0.0-0.0-0.20125758072921324
gpt2	average	Sentence Sim	fastcompany	21.6376	88	78_www.wired.com-91_www.entrepreneur.com-10_www.eventbrite.com-77_www.androidheadlines.com-85_www.pcworld.com-58_medium.com	6	0.0-0.1652311753725686-0.0-0.0-0.0-0.0-0.19375409277914976-0.0-0.0-0.0-0.17409988725269104-0.0-0.14359114023469405-0.0-0.15096492912946716-0.0-0.0-0.0-0.0-0.0-0.17235877523142953
gpt2	ensemble	Sentence Sim	fastcompany	21.1732	88	78_www.wired.com-91_www.entrepreneur.com-10_www.eventbrite.com-77_www.androidheadlines.com-85_www.pcworld.com-58_medium.com	6	0.0-0.1652311753725686-0.0-0.0-0.0-0.0-0.19375409277914976-0.0-0.0-0.0-0.17409988725269104-0.0-0.14359114023469405-0.0-0.15096492912946716-0.0-0.0-0.0-0.0-0.0-0.17235877523142953
gpt2	average	Sentence Sim	fastcompany	21.9109	88	78_www.wired.com-91_www.entrepreneur.com-10_www.eventbrite.com-77_www.androidheadlines.com-84_www.glassdoor.com-85_www.pcworld.com-58_medium.com	7	0.0-0.14499470454625343-0.0-0.0-0.0-0.0-0.17002431516809388-0.0-0.0-0.0-0.15277723260649798-0.0-0.12600500424235075-0.12247368440420109-0.1324756980431622-0.0-0.0-0.0-0.0-0.0-0.1512493609894408
gpt2	ensemble	Sentence Sim	fastcompany	21.2976	88	78_www.wired.com-91_www.entrepreneur.com-10_www.eventbrite.com-77_www.androidheadlines.com-84_www.glassdoor.com-85_www.pcworld.com-58_medium.com	7	0.0-0.14499470454625343-0.0-0.0-0.0-0.0-0.17002431516809388-0.0-0.0-0.0-0.15277723260649798-0.0-0.12600500424235075-0.12247368440420109-0.1324756980431622-0.0-0.0-0.0-0.0-0.0-0.1512493609894408
gpt2	average	Sentence Sim	fastcompany	22.0211	88	78_www.wired.com-45_www.npr.org-91_www.entrepreneur.com-10_www.eventbrite.com-77_www.androidheadlines.com-84_www.glassdoor.com-85_www.pcworld.com-58_medium.com	8	0.0-0.12966941454040032-0.0-0.10569551525217502-0.0-0.0-0.15205350757100403-0.0-0.0-0.0-0.13662936428735278-0.0-0.11268684039460301-0.1095287652262668-0.11847361088009864-0.0-0.0-0.0-0.0-0.0-0.13526298184809965
gpt2	ensemble	Sentence Sim	fastcompany	21.3809	88	78_www.wired.com-45_www.npr.org-91_www.entrepreneur.com-10_www.eventbrite.com-77_www.androidheadlines.com-84_www.glassdoor.com-85_www.pcworld.com-58_medium.com	8	0.0-0.12966941454040032-0.0-0.10569551525217502-0.0-0.0-0.15205350757100403-0.0-0.0-0.0-0.13662936428735278-0.0-0.11268684039460301-0.1095287652262668-0.11847361088009864-0.0-0.0-0.0-0.0-0.0-0.13526298184809965
gpt2	average	Sentence Sim	fastcompany	22.0429	88	78_www.wired.com-45_www.npr.org-91_www.entrepreneur.com-10_www.eventbrite.com-77_www.androidheadlines.com-84_www.glassdoor.com-85_www.pcworld.com-60_www.csmonitor.com-58_medium.com	9	0.0-0.11753795738192177-0.0-0.09580697970452993-0.0-0.0-0.13782786600832614-0.0-0.0-0.0-0.12384675641241899-0.0-0.10214421874849765-0.0992816030278941-0.10738959743023167-0.09355681292675841-0.0-0.0-0.0-0.0-0.12260820835942146
gpt2	ensemble	Sentence Sim	fastcompany	21.3809	88	78_www.wired.com-45_www.npr.org-91_www.entrepreneur.com-10_www.eventbrite.com-77_www.androidheadlines.com-84_www.glassdoor.com-85_www.pcworld.com-60_www.csmonitor.com-58_medium.com	9	0.0-0.11753795738192177-0.0-0.09580697970452993-0.0-0.0-0.13782786600832614-0.0-0.0-0.0-0.12384675641241899-0.0-0.10214421874849765-0.0992816030278941-0.10738959743023167-0.09355681292675841-0.0-0.0-0.0-0.0-0.12260820835942146
gpt2	average	Sentence Sim	fastcompany	22.1496	88	78_www.wired.com-45_www.npr.org-81_www.librarything.com-91_www.entrepreneur.com-10_www.eventbrite.com-77_www.androidheadlines.com-84_www.glassdoor.com-85_www.pcworld.com-60_www.csmonitor.com-58_medium.com	10	0.0-0.10965878890621779-0.0-0.08938454944408669-0.06703509786291265-0.0-0.1285885615222216-0.0-0.0-0.0-0.11554467697630819-0.0-0.09529697104856136-0.09262625105293237-0.1001907252570373-0.08728522281647094-0.0-0.0-0.0-0.0-0.11438915511325126
gpt2	ensemble	Sentence Sim	fastcompany	21.4646	88	78_www.wired.com-45_www.npr.org-81_www.librarything.com-91_www.entrepreneur.com-10_www.eventbrite.com-77_www.androidheadlines.com-84_www.glassdoor.com-85_www.pcworld.com-60_www.csmonitor.com-58_medium.com	10	0.0-0.10965878890621779-0.0-0.08938454944408669-0.06703509786291265-0.0-0.1285885615222216-0.0-0.0-0.0-0.11554467697630819-0.0-0.09529697104856136-0.09262625105293237-0.1001907252570373-0.08728522281647094-0.0-0.0-0.0-0.0-0.11438915511325126
gpt2	average	Prior	fastcompany	24.0734	10	17_www.express.co.uk	1	0.0-0.0-1.0-0.0-0.0-0.0-0.0-0.0-0.0-0.0-0.0-0.0-0.0-0.0-0.0-0.0-0.0-0.0-0.0-0.0-0.0
gpt2	average	Prior	fastcompany	23.9541	10	17_www.express.co.uk-39_www.booking.com	2	0.0-0.0-0.520516356876516-0.0-0.0-0.0-0.0-0.0-0.0-0.0-0.0-0.0-0.0-0.0-0.0-0.0-0.0-0.4794836431234839-0.0-0.0-0.0
gpt2	average	Prior	fastcompany	23.4926	10	17_www.express.co.uk-39_www.booking.com-journals.plos.org	3	0.0-0.0-0.36239162867662816-0.0-0.0-0.0-0.0-0.0-0.0-0.0-0.0-0.0-0.0-0.0-0.0-0.0-0.0-0.3338240115988217-0.3037843597245501-0.0-0.0
gpt2	average	Prior	fastcompany	22.7487	10	17_www.express.co.uk-91_www.entrepreneur.com-39_www.booking.com-journals.plos.org	4	0.0-0.0-0.27854220922585715-0.0-0.0-0.0-0.23137791498377056-0.0-0.0-0.0-0.0-0.0-0.0-0.0-0.0-0.0-0.0-0.2565845078235683-0.23349536796680398-0.0-0.0
gpt2	average	Prior	fastcompany	22.5072	10	15_www.dailymail.co.uk-17_www.express.co.uk-81_www.librarything.com-91_www.entrepreneur.com-85_www.pcworld.com-39_www.booking.com	6	0.14723171675779814-0.0-0.21171439950131968-0.0-0.14871509662266777-0.0-0.16414347868071727-0.0-0.0-0.0-0.0-0.0-0.0-0.0-0.1468185602280704-0.0-0.0-0.18137674820942673-0.0-0.0-0.0
gpt2	average	Prior	fastcompany	23.3989	10	17_www.express.co.uk-81_www.librarything.com-91_www.entrepreneur.com-70_www.insiderpages.com-22_forums.macrumors.com-39_www.booking.com-journals.plos.org	7	0.0-0.0-0.16902857219335274-0.0-0.13919643755336372-0.0-0.14040772748761252-0.0-0.13080423561826166-0.0-0.0-0.1231664426377593-0.0-0.0-0.0-0.0-0.0-0.15570391692120547-0.1416926675884447-0.0-0.0
gpt2	average	Prior	fastcompany	23.2989	10	17_www.express.co.uk-81_www.librarything.com-91_www.entrepreneur.com-70_www.insiderpages.com-22_forums.macrumors.com-39_www.booking.com-journals.plos.org-www.frontiersin.org	8	0.0-0.0-0.15053179565474314-0.0-0.12396418795801191-0.0-0.12504292657891447-0.0-0.11649034368189132-0.0-0.0-0.10968835347825269-0.0-0.0-0.0-0.0-0.0-0.13866525582322672-0.12618725583743648-0.10942988098752338-0.0
gpt2	average	Prior	fastcompany	23.1878	10	15_www.dailymail.co.uk-17_www.express.co.uk-81_www.librarything.com-91_www.entrepreneur.com-70_www.insiderpages.com-22_forums.macrumors.com-39_www.booking.com-journals.plos.org-www.frontiersin.org	9	0.09786373181821333-0.0-0.13580019237467328-0.0-0.11183258991262643-0.0-0.11280575914643103-0.0-0.1050901639283952-0.0-0.0-0.09895384186987558-0.0-0.0-0.0-0.0-0.0-0.1250949564148385-0.11383810007328532-0.09872066446166138-0.0
gpt2	average	Prior	fastcompany	22.7435	10	15_www.dailymail.co.uk-17_www.express.co.uk-45_www.npr.org-81_www.librarything.com-37_www.instructables.com-91_www.entrepreneur.com-77_www.androidheadlines.com-85_www.pcworld.com-39_www.booking.com-www.frontiersin.org	10	0.09670743952914704-0.0-0.139062139178236-0.08334333541250413-0.09768178032839629-0.08645008115391413-0.10781573351299348-0.0-0.0-0.0-0.0-0.0-0.0833006876292717-0.0-0.09643606247130532-0.0-0.0-0.11913520602569098-0.0-0.09006753475854093-0.0
gpt2	ensemble	Sentence Sim-topk-uniform	fastcompany	21.0495	5	78_www.wired.com-91_www.entrepreneur.com	2	0.0-0.5-0.0-0.0-0.0-0.0-0.5-0.0-0.0-0.0-0.0-0.0-0.0-0.0-0.0-0.0-0.0-0.0-0.0-0.0-0.0
gpt2	ensemble	Sentence Sim-topk-uniform	fastcompany	21.633	10	91_www.entrepreneur.com-10_www.eventbrite.com	2	0.0-0.0-0.0-0.0-0.0-0.0-0.5-0.0-0.0-0.0-0.5-0.0-0.0-0.0-0.0-0.0-0.0-0.0-0.0-0.0-0.0
gpt2	ensemble	Sentence Sim-topk-uniform	fastcompany	21.0495	42	78_www.wired.com-91_www.entrepreneur.com	2	0.0-0.5-0.0-0.0-0.0-0.0-0.5-0.0-0.0-0.0-0.0-0.0-0.0-0.0-0.0-0.0-0.0-0.0-0.0-0.0-0.0
gpt2	ensemble	Sentence Sim-topk-uniform	fastcompany	21.633	88	91_www.entrepreneur.com-10_www.eventbrite.com	2	0.0-0.0-0.0-0.0-0.0-0.0-0.5-0.0-0.0-0.0-0.5-0.0-0.0-0.0-0.0-0.0-0.0-0.0-0.0-0.0-0.0
gpt2	average	Sentence Sim-topk-uniform	fastcompany	21.2661	5	78_www.wired.com-91_www.entrepreneur.com	2	0.0-0.5-0.0-0.0-0.0-0.0-0.5-0.0-0.0-0.0-0.0-0.0-0.0-0.0-0.0-0.0-0.0-0.0-0.0-0.0-0.0
gpt2	average	Sentence Sim-topk-uniform	fastcompany	21.9129	10	91_www.entrepreneur.com-10_www.eventbrite.com	2	0.0-0.0-0.0-0.0-0.0-0.0-0.5-0.0-0.0-0.0-0.5-0.0-0.0-0.0-0.0-0.0-0.0-0.0-0.0-0.0-0.0
gpt2	average	Sentence Sim-topk-uniform	fastcompany	21.2661	42	78_www.wired.com-91_www.entrepreneur.com	2	0.0-0.5-0.0-0.0-0.0-0.0-0.5-0.0-0.0-0.0-0.0-0.0-0.0-0.0-0.0-0.0-0.0-0.0-0.0-0.0-0.0
gpt2	average	Sentence Sim-topk-uniform	fastcompany	21.9129	88	91_www.entrepreneur.com-10_www.eventbrite.com	2	0.0-0.0-0.0-0.0-0.0-0.0-0.5-0.0-0.0-0.0-0.5-0.0-0.0-0.0-0.0-0.0-0.0-0.0-0.0-0.0-0.0
deberta	ensemble	Sentence Sim-topk-uniform	fastcompany	3.85592	5	78_www.wired.com-91_www.entrepreneur.com	2	0.0-0.5-0.0-0.0-0.0-0.0-0.5-0.0-0.0-0.0-0.0-0.0-0.0-0.0-0.0-0.0-0.0-0.0-0.0-0.0-0.0
deberta	ensemble	Sentence Sim-topk-uniform	fastcompany	4.26811	10	91_www.entrepreneur.com-10_www.eventbrite.com	2	0.0-0.0-0.0-0.0-0.0-0.0-0.5-0.0-0.0-0.0-0.5-0.0-0.0-0.0-0.0-0.0-0.0-0.0-0.0-0.0-0.0
deberta	ensemble	Sentence Sim-topk-uniform	fastcompany	3.85592	42	78_www.wired.com-91_www.entrepreneur.com	2	0.0-0.5-0.0-0.0-0.0-0.0-0.5-0.0-0.0-0.0-0.0-0.0-0.0-0.0-0.0-0.0-0.0-0.0-0.0-0.0-0.0
deberta	ensemble	Sentence Sim-topk-uniform	fastcompany	4.289	88	91_www.entrepreneur.com-10_www.eventbrite.com	2	0.0-0.0-0.0-0.0-0.0-0.0-0.5-0.0-0.0-0.0-0.5-0.0-0.0-0.0-0.0-0.0-0.0-0.0-0.0-0.0-0.0
deberta	ensemble	Sentence Sim-topk-uniform	fastcompany	4.28482	10	78_www.wired.com-91_www.entrepreneur.com-10_www.eventbrite.com-84_www.glassdoor.com-58_medium.com	5	0.0-0.2-0.0-0.0-0.0-0.0-0.2-0.0-0.0-0.0-0.2-0.0-0.0-0.2-0.0-0.0-0.0-0.0-0.0-0.0-0.2
deberta	ensemble	Sentence Sim-topk-uniform	fastcompany	4.28482	42	78_www.wired.com-91_www.entrepreneur.com-10_www.eventbrite.com-84_www.glassdoor.com-58_medium.com	5	0.0-0.2-0.0-0.0-0.0-0.0-0.2-0.0-0.0-0.0-0.2-0.0-0.0-0.2-0.0-0.0-0.0-0.0-0.0-0.0-0.2
deberta	ensemble	Sentence Sim-topk-uniform	fastcompany	4.04492	88	78_www.wired.com-91_www.entrepreneur.com-10_www.eventbrite.com-85_www.pcworld.com-58_medium.com	5	0.0-0.2-0.0-0.0-0.0-0.0-0.2-0.0-0.0-0.0-0.2-0.0-0.0-0.0-0.2-0.0-0.0-0.0-0.0-0.0-0.2
deberta	ensemble	Sentence Sim-topk-uniform	fastcompany	3.9861	5	15_www.dailymail.co.uk-78_www.wired.com-45_www.npr.org-91_www.entrepreneur.com-10_www.eventbrite.com-77_www.androidheadlines.com-84_www.glassdoor.com-85_www.pcworld.com-60_www.csmonitor.com-58_medium.com	10	0.1-0.1-0.0-0.1-0.0-0.0-0.1-0.0-0.0-0.0-0.1-0.0-0.1-0.1-0.1-0.1-0.0-0.0-0.0-0.0-0.1
deberta	ensemble	Sentence Sim-topk-uniform	fastcompany	4.13276	10	78_www.wired.com-45_www.npr.org-91_www.entrepreneur.com-70_www.insiderpages.com-10_www.eventbrite.com-77_www.androidheadlines.com-84_www.glassdoor.com-85_www.pcworld.com-60_www.csmonitor.com-58_medium.com	10	0.0-0.1-0.0-0.1-0.0-0.0-0.1-0.0-0.1-0.0-0.1-0.0-0.1-0.1-0.1-0.1-0.0-0.0-0.0-0.0-0.1
deberta	ensemble	Sentence Sim-topk-uniform	fastcompany	4.16111	42	78_www.wired.com-45_www.npr.org-81_www.librarything.com-91_www.entrepreneur.com-10_www.eventbrite.com-77_www.androidheadlines.com-84_www.glassdoor.com-85_www.pcworld.com-60_www.csmonitor.com-58_medium.com	10	0.0-0.1-0.0-0.1-0.1-0.0-0.1-0.0-0.0-0.0-0.1-0.0-0.1-0.1-0.1-0.1-0.0-0.0-0.0-0.0-0.1
deberta	ensemble	Sentence Sim-topk-uniform	fastcompany	4.18148	88	78_www.wired.com-45_www.npr.org-81_www.librarything.com-91_www.entrepreneur.com-10_www.eventbrite.com-77_www.androidheadlines.com-84_www.glassdoor.com-85_www.pcworld.com-60_www.csmonitor.com-58_medium.com	10	0.0-0.1-0.0-0.1-0.1-0.0-0.1-0.0-0.0-0.0-0.1-0.0-0.1-0.1-0.1-0.1-0.0-0.0-0.0-0.0-0.1
deberta	ensemble	tfidf-topk-uniform	fastcompany	3.96668	10	78_www.wired.com-17_www.express.co.uk-91_www.entrepreneur.com-85_www.pcworld.com-58_medium.com	5	0.0-0.2-0.2-0.0-0.0-0.0-0.2-0.0-0.0-0.0-0.0-0.0-0.0-0.0-0.2-0.0-0.0-0.0-0.0-0.0-0.2
deberta	ensemble	tfidf-topk-uniform	fastcompany	3.96281	42	78_www.wired.com-17_www.express.co.uk-91_www.entrepreneur.com-85_www.pcworld.com-58_medium.com	5	0.0-0.2-0.2-0.0-0.0-0.0-0.2-0.0-0.0-0.0-0.0-0.0-0.0-0.0-0.2-0.0-0.0-0.0-0.0-0.0-0.2
deberta	ensemble	tfidf-topk-uniform	fastcompany	3.9861	88	78_www.wired.com-17_www.express.co.uk-91_www.entrepreneur.com-85_www.pcworld.com-58_medium.com	5	0.0-0.2-0.2-0.0-0.0-0.0-0.2-0.0-0.0-0.0-0.0-0.0-0.0-0.0-0.2-0.0-0.0-0.0-0.0-0.0-0.2
deberta	ensemble	tfidf-topk-uniform	fastcompany	4.22664	5	15_www.dailymail.co.uk-78_www.wired.com-17_www.express.co.uk-81_www.librarything.com-91_www.entrepreneur.com-100_www.ign.com-10_www.eventbrite.com-85_www.pcworld.com-99_www.lonelyplanet.com-58_medium.com	10	0.1-0.1-0.1-0.0-0.1-0.0-0.1-0.0-0.0-0.1-0.1-0.0-0.0-0.0-0.1-0.0-0.1-0.0-0.0-0.0-0.1
deberta	ensemble	tfidf-topk-uniform	fastcompany	4.1368	10	15_www.dailymail.co.uk-78_www.wired.com-17_www.express.co.uk-91_www.entrepreneur.com-100_www.ign.com-10_www.eventbrite.com-77_www.androidheadlines.com-85_www.pcworld.com-99_www.lonelyplanet.com-58_medium.com	10	0.1-0.1-0.1-0.0-0.0-0.0-0.1-0.0-0.0-0.1-0.1-0.0-0.1-0.0-0.1-0.0-0.1-0.0-0.0-0.0-0.1
deberta	ensemble	tfidf-topk-uniform	fastcompany	4.03702	42	15_www.dailymail.co.uk-78_www.wired.com-17_www.express.co.uk-91_www.entrepreneur.com-10_www.eventbrite.com-77_www.androidheadlines.com-85_www.pcworld.com-60_www.csmonitor.com-99_www.lonelyplanet.com-58_medium.com	10	0.1-0.1-0.1-0.0-0.0-0.0-0.1-0.0-0.0-0.0-0.1-0.0-0.1-0.0-0.1-0.1-0.1-0.0-0.0-0.0-0.1
deberta	ensemble	tfidf-topk-uniform	fastcompany	4.0926	88	15_www.dailymail.co.uk-78_www.wired.com-17_www.express.co.uk-91_www.entrepreneur.com-10_www.eventbrite.com-85_www.pcworld.com-99_www.lonelyplanet.com-58_medium.com	10	0.125-0.125-0.125-0.0-0.0-0.0-0.125-0.0-0.0-0.0-0.125-0.0-0.0-0.0-0.125-0.0-0.125-0.0-0.0-0.0-0.125
deberta	ensemble	tfidf-topk-uniform	fastcompany	4.0017	5	91_www.entrepreneur.com-58_medium.com	2	0.0-0.0-0.0-0.0-0.0-0.0-0.5-0.0-0.0-0.0-0.0-0.0-0.0-0.0-0.0-0.0-0.0-0.0-0.0-0.0-0.5
deberta	ensemble	Sentence Sim-topk-uniform	fastcompany	3.90137	5	78_www.wired.com-91_www.entrepreneur.com-58_medium.com	3	0.0-0.3333333333333333-0.0-0.0-0.0-0.0-0.3333333333333333-0.0-0.0-0.0-0.0-0.0-0.0-0.0-0.0-0.0-0.0-0.0-0.0-0.0-0.3333333333333333
deberta	ensemble	Sentence Sim-topk-uniform	fastcompany	4.03308	10	78_www.wired.com-91_www.entrepreneur.com-10_www.eventbrite.com	3	0.0-0.3333333333333333-0.0-0.0-0.0-0.0-0.3333333333333333-0.0-0.0-0.0-0.3333333333333333-0.0-0.0-0.0-0.0-0.0-0.0-0.0-0.0-0.0-0.0
deberta	ensemble	Sentence Sim-topk-uniform	fastcompany	4.03308	42	78_www.wired.com-91_www.entrepreneur.com-10_www.eventbrite.com	3	0.0-0.3333333333333333-0.0-0.0-0.0-0.0-0.3333333333333333-0.0-0.0-0.0-0.3333333333333333-0.0-0.0-0.0-0.0-0.0-0.0-0.0-0.0-0.0-0.0
deberta	ensemble	Sentence Sim-topk-uniform	fastcompany	4.19784	88	91_www.entrepreneur.com-10_www.eventbrite.com-58_medium.com	3	0.0-0.0-0.0-0.0-0.0-0.0-0.3333333333333333-0.0-0.0-0.0-0.3333333333333333-0.0-0.0-0.0-0.0-0.0-0.0-0.0-0.0-0.0-0.3333333333333333
deberta	ensemble	Sentence Sim-topk-uniform	fastcompany	3.93197	5	78_www.wired.com-91_www.entrepreneur.com-85_www.pcworld.com-58_medium.com	4	0.0-0.25-0.0-0.0-0.0-0.0-0.25-0.0-0.0-0.0-0.0-0.0-0.0-0.0-0.25-0.0-0.0-0.0-0.0-0.0-0.25
deberta	ensemble	Sentence Sim-topk-uniform	fastcompany	4.02915	10	78_www.wired.com-91_www.entrepreneur.com-10_www.eventbrite.com-58_medium.com	4	0.0-0.25-0.0-0.0-0.0-0.0-0.25-0.0-0.0-0.0-0.25-0.0-0.0-0.0-0.0-0.0-0.0-0.0-0.0-0.0-0.25
deberta	ensemble	Sentence Sim-topk-uniform	fastcompany	4.38215	42	78_www.wired.com-91_www.entrepreneur.com-10_www.eventbrite.com-84_www.glassdoor.com	4	0.0-0.25-0.0-0.0-0.0-0.0-0.25-0.0-0.0-0.0-0.25-0.0-0.0-0.25-0.0-0.0-0.0-0.0-0.0-0.0-0.0
deberta	ensemble	Sentence Sim-topk-uniform	fastcompany	4.05282	88	78_www.wired.com-91_www.entrepreneur.com-10_www.eventbrite.com-58_medium.com	4	0.0-0.25-0.0-0.0-0.0-0.0-0.25-0.0-0.0-0.0-0.25-0.0-0.0-0.0-0.0-0.0-0.0-0.0-0.0-0.0-0.25
deberta	ensemble	Entropy-topk-uniform	fastcompany	3.78873	42	15_www.dailymail.co.uk-78_www.wired.com-45_www.npr.org-37_www.instructables.com-91_www.entrepreneur.com-11_link.springer.com-85_www.pcworld.com-60_www.csmonitor.com-journals.plos.org-www.frontiersin.org	10	0.1-0.1-0.0-0.1-0.0-0.1-0.1-0.1-0.0-0.0-0.0-0.0-0.0-0.0-0.1-0.1-0.0-0.0-0.1-0.1-0.0
gpt2	average	Sentence Sim-topk-uniform	fastcompany	21.185	5	78_www.wired.com-91_www.entrepreneur.com-58_medium.com	3	0.0-0.3333333333333333-0.0-0.0-0.0-0.0-0.3333333333333333-0.0-0.0-0.0-0.0-0.0-0.0-0.0-0.0-0.0-0.0-0.0-0.0-0.0-0.3333333333333333
gpt2	ensemble	Sentence Sim-topk-uniform	fastcompany	20.8449	5	78_www.wired.com-91_www.entrepreneur.com-58_medium.com	3	0.0-0.3333333333333333-0.0-0.0-0.0-0.0-0.3333333333333333-0.0-0.0-0.0-0.0-0.0-0.0-0.0-0.0-0.0-0.0-0.0-0.0-0.0-0.3333333333333333
gpt2	average	Sentence Sim-topk-uniform	fastcompany	21.5641	10	78_www.wired.com-91_www.entrepreneur.com-10_www.eventbrite.com	3	0.0-0.3333333333333333-0.0-0.0-0.0-0.0-0.3333333333333333-0.0-0.0-0.0-0.3333333333333333-0.0-0.0-0.0-0.0-0.0-0.0-0.0-0.0-0.0-0.0
gpt2	ensemble	Sentence Sim-topk-uniform	fastcompany	21.2146	10	78_www.wired.com-91_www.entrepreneur.com-10_www.eventbrite.com	3	0.0-0.3333333333333333-0.0-0.0-0.0-0.0-0.3333333333333333-0.0-0.0-0.0-0.3333333333333333-0.0-0.0-0.0-0.0-0.0-0.0-0.0-0.0-0.0-0.0
gpt2	average	Sentence Sim-topk-uniform	fastcompany	21.5641	42	78_www.wired.com-91_www.entrepreneur.com-10_www.eventbrite.com	3	0.0-0.3333333333333333-0.0-0.0-0.0-0.0-0.3333333333333333-0.0-0.0-0.0-0.3333333333333333-0.0-0.0-0.0-0.0-0.0-0.0-0.0-0.0-0.0-0.0
gpt2	ensemble	Sentence Sim-topk-uniform	fastcompany	21.2146	42	78_www.wired.com-91_www.entrepreneur.com-10_www.eventbrite.com	3	0.0-0.3333333333333333-0.0-0.0-0.0-0.0-0.3333333333333333-0.0-0.0-0.0-0.3333333333333333-0.0-0.0-0.0-0.0-0.0-0.0-0.0-0.0-0.0-0.0
gpt2	average	Sentence Sim-topk-uniform	fastcompany	21.5862	88	91_www.entrepreneur.com-10_www.eventbrite.com-58_medium.com	3	0.0-0.0-0.0-0.0-0.0-0.0-0.3333333333333333-0.0-0.0-0.0-0.3333333333333333-0.0-0.0-0.0-0.0-0.0-0.0-0.0-0.0-0.0-0.3333333333333333
gpt2	ensemble	Sentence Sim-topk-uniform	fastcompany	21.2146	88	91_www.entrepreneur.com-10_www.eventbrite.com-58_medium.com	3	0.0-0.0-0.0-0.0-0.0-0.0-0.3333333333333333-0.0-0.0-0.0-0.3333333333333333-0.0-0.0-0.0-0.0-0.0-0.0-0.0-0.0-0.0-0.3333333333333333
gpt2	average	Sentence Sim-topk-uniform	fastcompany	21.2841	5	78_www.wired.com-91_www.entrepreneur.com-85_www.pcworld.com-58_medium.com	4	0.0-0.25-0.0-0.0-0.0-0.0-0.25-0.0-0.0-0.0-0.0-0.0-0.0-0.0-0.25-0.0-0.0-0.0-0.0-0.0-0.25
gpt2	ensemble	Sentence Sim-topk-uniform	fastcompany	20.9265	5	78_www.wired.com-91_www.entrepreneur.com-85_www.pcworld.com-58_medium.com	4	0.0-0.25-0.0-0.0-0.0-0.0-0.25-0.0-0.0-0.0-0.0-0.0-0.0-0.0-0.25-0.0-0.0-0.0-0.0-0.0-0.25
gpt2	average	Sentence Sim-topk-uniform	fastcompany	21.4385	10	78_www.wired.com-91_www.entrepreneur.com-10_www.eventbrite.com-58_medium.com	4	0.0-0.25-0.0-0.0-0.0-0.0-0.25-0.0-0.0-0.0-0.25-0.0-0.0-0.0-0.0-0.0-0.0-0.0-0.0-0.0-0.25
gpt2	ensemble	Sentence Sim-topk-uniform	fastcompany	21.0084	10	78_www.wired.com-91_www.entrepreneur.com-10_www.eventbrite.com-58_medium.com	4	0.0-0.25-0.0-0.0-0.0-0.0-0.25-0.0-0.0-0.0-0.25-0.0-0.0-0.0-0.0-0.0-0.0-0.0-0.0-0.0-0.25
gpt2	average	Sentence Sim-topk-uniform	fastcompany	22.1997	42	78_www.wired.com-91_www.entrepreneur.com-10_www.eventbrite.com-84_www.glassdoor.com	4	0.0-0.25-0.0-0.0-0.0-0.0-0.25-0.0-0.0-0.0-0.25-0.0-0.0-0.25-0.0-0.0-0.0-0.0-0.0-0.0-0.0
gpt2	ensemble	Sentence Sim-topk-uniform	fastcompany	21.5486	42	78_www.wired.com-91_www.entrepreneur.com-10_www.eventbrite.com-84_www.glassdoor.com	4	0.0-0.25-0.0-0.0-0.0-0.0-0.25-0.0-0.0-0.0-0.25-0.0-0.0-0.25-0.0-0.0-0.0-0.0-0.0-0.0-0.0
gpt2	average	Sentence Sim-topk-uniform	fastcompany	21.4385	88	78_www.wired.com-91_www.entrepreneur.com-10_www.eventbrite.com-58_medium.com	4	0.0-0.25-0.0-0.0-0.0-0.0-0.25-0.0-0.0-0.0-0.25-0.0-0.0-0.0-0.0-0.0-0.0-0.0-0.0-0.0-0.25
gpt2	ensemble	Sentence Sim-topk-uniform	fastcompany	21.0084	88	78_www.wired.com-91_www.entrepreneur.com-10_www.eventbrite.com-58_medium.com	4	0.0-0.25-0.0-0.0-0.0-0.0-0.25-0.0-0.0-0.0-0.25-0.0-0.0-0.0-0.0-0.0-0.0-0.0-0.0-0.0-0.25
gpt2	average	tfidf-topk-uniform	fastcompany	21.2677	5	91_www.entrepreneur.com-58_medium.com	2	0.0-0.0-0.0-0.0-0.0-0.0-0.5-0.0-0.0-0.0-0.0-0.0-0.0-0.0-0.0-0.0-0.0-0.0-0.0-0.0-0.5
gpt2	ensemble	tfidf-topk-uniform	fastcompany	20.9674	5	91_www.entrepreneur.com-58_medium.com	2	0.0-0.0-0.0-0.0-0.0-0.0-0.5-0.0-0.0-0.0-0.0-0.0-0.0-0.0-0.0-0.0-0.0-0.0-0.0-0.0-0.5
gpt2	average	tfidf-topk-uniform	fastcompany	21.2677	10	91_www.entrepreneur.com-58_medium.com	2	0.0-0.0-0.0-0.0-0.0-0.0-0.5-0.0-0.0-0.0-0.0-0.0-0.0-0.0-0.0-0.0-0.0-0.0-0.0-0.0-0.5
gpt2	ensemble	tfidf-topk-uniform	fastcompany	20.9674	10	91_www.entrepreneur.com-58_medium.com	2	0.0-0.0-0.0-0.0-0.0-0.0-0.5-0.0-0.0-0.0-0.0-0.0-0.0-0.0-0.0-0.0-0.0-0.0-0.0-0.0-0.5
gpt2	average	tfidf-topk-uniform	fastcompany	21.1114	42	78_www.wired.com-58_medium.com	2	0.0-0.5-0.0-0.0-0.0-0.0-0.0-0.0-0.0-0.0-0.0-0.0-0.0-0.0-0.0-0.0-0.0-0.0-0.0-0.0-0.5
gpt2	ensemble	tfidf-topk-uniform	fastcompany	20.8042	42	78_www.wired.com-58_medium.com	2	0.0-0.5-0.0-0.0-0.0-0.0-0.0-0.0-0.0-0.0-0.0-0.0-0.0-0.0-0.0-0.0-0.0-0.0-0.0-0.0-0.5
gpt2	average	tfidf-topk-uniform	fastcompany	21.2677	88	91_www.entrepreneur.com-58_medium.com	2	0.0-0.0-0.0-0.0-0.0-0.0-0.5-0.0-0.0-0.0-0.0-0.0-0.0-0.0-0.0-0.0-0.0-0.0-0.0-0.0-0.5
gpt2	ensemble	tfidf-topk-uniform	fastcompany	20.9674	88	91_www.entrepreneur.com-58_medium.com	2	0.0-0.0-0.0-0.0-0.0-0.0-0.5-0.0-0.0-0.0-0.0-0.0-0.0-0.0-0.0-0.0-0.0-0.0-0.0-0.0-0.5
gpt2	average	tfidf-topk-uniform	fastcompany	21.185	5	78_www.wired.com-91_www.entrepreneur.com-58_medium.com	3	0.0-0.3333333333333333-0.0-0.0-0.0-0.0-0.3333333333333333-0.0-0.0-0.0-0.0-0.0-0.0-0.0-0.0-0.0-0.0-0.0-0.0-0.0-0.3333333333333333
gpt2	ensemble	tfidf-topk-uniform	fastcompany	20.8449	5	78_www.wired.com-91_www.entrepreneur.com-58_medium.com	3	0.0-0.3333333333333333-0.0-0.0-0.0-0.0-0.3333333333333333-0.0-0.0-0.0-0.0-0.0-0.0-0.0-0.0-0.0-0.0-0.0-0.0-0.0-0.3333333333333333
gpt2	average	tfidf-topk-uniform	fastcompany	21.185	10	78_www.wired.com-91_www.entrepreneur.com-58_medium.com	3	0.0-0.3333333333333333-0.0-0.0-0.0-0.0-0.3333333333333333-0.0-0.0-0.0-0.0-0.0-0.0-0.0-0.0-0.0-0.0-0.0-0.0-0.0-0.3333333333333333
gpt2	ensemble	tfidf-topk-uniform	fastcompany	20.8449	10	78_www.wired.com-91_www.entrepreneur.com-58_medium.com	3	0.0-0.3333333333333333-0.0-0.0-0.0-0.0-0.3333333333333333-0.0-0.0-0.0-0.0-0.0-0.0-0.0-0.0-0.0-0.0-0.0-0.0-0.0-0.3333333333333333
gpt2	average	tfidf-topk-uniform	fastcompany	21.185	42	78_www.wired.com-91_www.entrepreneur.com-58_medium.com	3	0.0-0.3333333333333333-0.0-0.0-0.0-0.0-0.3333333333333333-0.0-0.0-0.0-0.0-0.0-0.0-0.0-0.0-0.0-0.0-0.0-0.0-0.0-0.3333333333333333
gpt2	ensemble	tfidf-topk-uniform	fastcompany	20.8449	42	78_www.wired.com-91_www.entrepreneur.com-58_medium.com	3	0.0-0.3333333333333333-0.0-0.0-0.0-0.0-0.3333333333333333-0.0-0.0-0.0-0.0-0.0-0.0-0.0-0.0-0.0-0.0-0.0-0.0-0.0-0.3333333333333333
gpt2	average	tfidf-topk-uniform	fastcompany	21.185	88	78_www.wired.com-91_www.entrepreneur.com-58_medium.com	3	0.0-0.3333333333333333-0.0-0.0-0.0-0.0-0.3333333333333333-0.0-0.0-0.0-0.0-0.0-0.0-0.0-0.0-0.0-0.0-0.0-0.0-0.0-0.3333333333333333
gpt2	ensemble	tfidf-topk-uniform	fastcompany	20.8449	88	78_www.wired.com-91_www.entrepreneur.com-58_medium.com	3	0.0-0.3333333333333333-0.0-0.0-0.0-0.0-0.3333333333333333-0.0-0.0-0.0-0.0-0.0-0.0-0.0-0.0-0.0-0.0-0.0-0.0-0.0-0.3333333333333333
gpt2	average	tfidf-topk-uniform	fastcompany	21.2841	5	78_www.wired.com-91_www.entrepreneur.com-85_www.pcworld.com-58_medium.com	4	0.0-0.25-0.0-0.0-0.0-0.0-0.25-0.0-0.0-0.0-0.0-0.0-0.0-0.0-0.25-0.0-0.0-0.0-0.0-0.0-0.25
gpt2	ensemble	tfidf-topk-uniform	fastcompany	20.9265	5	78_www.wired.com-91_www.entrepreneur.com-85_www.pcworld.com-58_medium.com	4	0.0-0.25-0.0-0.0-0.0-0.0-0.25-0.0-0.0-0.0-0.0-0.0-0.0-0.0-0.25-0.0-0.0-0.0-0.0-0.0-0.25
gpt2	average	tfidf-topk-uniform	fastcompany	21.2841	10	78_www.wired.com-91_www.entrepreneur.com-85_www.pcworld.com-58_medium.com	4	0.0-0.25-0.0-0.0-0.0-0.0-0.25-0.0-0.0-0.0-0.0-0.0-0.0-0.0-0.25-0.0-0.0-0.0-0.0-0.0-0.25
gpt2	ensemble	tfidf-topk-uniform	fastcompany	20.9265	10	78_www.wired.com-91_www.entrepreneur.com-85_www.pcworld.com-58_medium.com	4	0.0-0.25-0.0-0.0-0.0-0.0-0.25-0.0-0.0-0.0-0.0-0.0-0.0-0.0-0.25-0.0-0.0-0.0-0.0-0.0-0.25
gpt2	average	tfidf-topk-uniform	fastcompany	21.2841	42	78_www.wired.com-91_www.entrepreneur.com-85_www.pcworld.com-58_medium.com	4	0.0-0.25-0.0-0.0-0.0-0.0-0.25-0.0-0.0-0.0-0.0-0.0-0.0-0.0-0.25-0.0-0.0-0.0-0.0-0.0-0.25
gpt2	ensemble	tfidf-topk-uniform	fastcompany	20.9265	42	78_www.wired.com-91_www.entrepreneur.com-85_www.pcworld.com-58_medium.com	4	0.0-0.25-0.0-0.0-0.0-0.0-0.25-0.0-0.0-0.0-0.0-0.0-0.0-0.0-0.25-0.0-0.0-0.0-0.0-0.0-0.25
gpt2	average	tfidf-topk-uniform	fastcompany	21.2841	88	78_www.wired.com-91_www.entrepreneur.com-85_www.pcworld.com-58_medium.com	4	0.0-0.25-0.0-0.0-0.0-0.0-0.25-0.0-0.0-0.0-0.0-0.0-0.0-0.0-0.25-0.0-0.0-0.0-0.0-0.0-0.25
gpt2	ensemble	tfidf-topk-uniform	fastcompany	20.9265	88	78_www.wired.com-91_www.entrepreneur.com-85_www.pcworld.com-58_medium.com	4	0.0-0.25-0.0-0.0-0.0-0.0-0.25-0.0-0.0-0.0-0.0-0.0-0.0-0.0-0.25-0.0-0.0-0.0-0.0-0.0-0.25
deberta	ensemble	tfidf-topk-uniform	fastcompany	4.00561	10	91_www.entrepreneur.com-58_medium.com	2	0.0-0.0-0.0-0.0-0.0-0.0-0.5-0.0-0.0-0.0-0.0-0.0-0.0-0.0-0.0-0.0-0.0-0.0-0.0-0.0-0.5
deberta	ensemble	tfidf-topk-uniform	fastcompany	3.909	42	78_www.wired.com-58_medium.com	2	0.0-0.5-0.0-0.0-0.0-0.0-0.0-0.0-0.0-0.0-0.0-0.0-0.0-0.0-0.0-0.0-0.0-0.0-0.0-0.0-0.5
deberta	ensemble	tfidf-topk-uniform	fastcompany	4.02915	88	91_www.entrepreneur.com-58_medium.com	2	0.0-0.0-0.0-0.0-0.0-0.0-0.5-0.0-0.0-0.0-0.0-0.0-0.0-0.0-0.0-0.0-0.0-0.0-0.0-0.0-0.5
deberta	ensemble	tfidf-topk-uniform	fastcompany	3.90137	5	78_www.wired.com-91_www.entrepreneur.com-58_medium.com	3	0.0-0.3333333333333333-0.0-0.0-0.0-0.0-0.3333333333333333-0.0-0.0-0.0-0.0-0.0-0.0-0.0-0.0-0.0-0.0-0.0-0.0-0.0-0.3333333333333333
deberta	ensemble	tfidf-topk-uniform	fastcompany	3.90518	10	78_www.wired.com-91_www.entrepreneur.com-58_medium.com	3	0.0-0.3333333333333333-0.0-0.0-0.0-0.0-0.3333333333333333-0.0-0.0-0.0-0.0-0.0-0.0-0.0-0.0-0.0-0.0-0.0-0.0-0.0-0.3333333333333333
deberta	ensemble	tfidf-topk-uniform	fastcompany	3.90137	42	78_www.wired.com-91_www.entrepreneur.com-58_medium.com	3	0.0-0.3333333333333333-0.0-0.0-0.0-0.0-0.3333333333333333-0.0-0.0-0.0-0.0-0.0-0.0-0.0-0.0-0.0-0.0-0.0-0.0-0.0-0.3333333333333333
deberta	ensemble	tfidf-topk-uniform	fastcompany	3.9243	88	78_www.wired.com-91_www.entrepreneur.com-58_medium.com	3	0.0-0.3333333333333333-0.0-0.0-0.0-0.0-0.3333333333333333-0.0-0.0-0.0-0.0-0.0-0.0-0.0-0.0-0.0-0.0-0.0-0.0-0.0-0.3333333333333333
deberta	ensemble	tfidf-topk-uniform	fastcompany	3.93197	5	78_www.wired.com-91_www.entrepreneur.com-85_www.pcworld.com-58_medium.com	4	0.0-0.25-0.0-0.0-0.0-0.0-0.25-0.0-0.0-0.0-0.0-0.0-0.0-0.0-0.25-0.0-0.0-0.0-0.0-0.0-0.25
deberta	ensemble	tfidf-topk-uniform	fastcompany	3.93581	10	78_www.wired.com-91_www.entrepreneur.com-85_www.pcworld.com-58_medium.com	4	0.0-0.25-0.0-0.0-0.0-0.0-0.25-0.0-0.0-0.0-0.0-0.0-0.0-0.0-0.25-0.0-0.0-0.0-0.0-0.0-0.25
deberta	ensemble	tfidf-topk-uniform	fastcompany	3.93581	42	78_www.wired.com-91_www.entrepreneur.com-85_www.pcworld.com-58_medium.com	4	0.0-0.25-0.0-0.0-0.0-0.0-0.25-0.0-0.0-0.0-0.0-0.0-0.0-0.0-0.25-0.0-0.0-0.0-0.0-0.0-0.25
deberta	ensemble	tfidf-topk-uniform	fastcompany	3.95508	88	78_www.wired.com-91_www.entrepreneur.com-85_www.pcworld.com-58_medium.com	4	0.0-0.25-0.0-0.0-0.0-0.0-0.25-0.0-0.0-0.0-0.0-0.0-0.0-0.0-0.25-0.0-0.0-0.0-0.0-0.0-0.25
gpt2	average	Prior	fastcompany	24.0734	42	17_www.express.co.uk	1	0.0-0.0-1.0-0.0-0.0-0.0-0.0-0.0-0.0-0.0-0.0-0.0-0.0-0.0-0.0-0.0-0.0-0.0-0.0-0.0-0.0
gpt2	ensemble	Prior	fastcompany	23.9455	42	17_www.express.co.uk	1	0.0-0.0-1.0-0.0-0.0-0.0-0.0-0.0-0.0-0.0-0.0-0.0-0.0-0.0-0.0-0.0-0.0-0.0-0.0-0.0-0.0
gpt2	average	Prior	fastcompany	24.0734	88	17_www.express.co.uk	1	0.0-0.0-1.0-0.0-0.0-0.0-0.0-0.0-0.0-0.0-0.0-0.0-0.0-0.0-0.0-0.0-0.0-0.0-0.0-0.0-0.0
gpt2	ensemble	Prior	fastcompany	23.9455	88	17_www.express.co.uk	1	0.0-0.0-1.0-0.0-0.0-0.0-0.0-0.0-0.0-0.0-0.0-0.0-0.0-0.0-0.0-0.0-0.0-0.0-0.0-0.0-0.0
gpt2	ensemble	Prior	fastcompany	24.1805	10	17_www.express.co.uk-39_www.booking.com	2	0.0-0.0-0.520516356876516-0.0-0.0-0.0-0.0-0.0-0.0-0.0-0.0-0.0-0.0-0.0-0.0-0.0-0.0-0.4794836431234839-0.0-0.0-0.0
gpt2	average	Prior	fastcompany	23.9541	42	17_www.express.co.uk-39_www.booking.com	2	0.0-0.0-0.520516356876516-0.0-0.0-0.0-0.0-0.0-0.0-0.0-0.0-0.0-0.0-0.0-0.0-0.0-0.0-0.4794836431234839-0.0-0.0-0.0
gpt2	ensemble	Prior	fastcompany	24.1805	42	17_www.express.co.uk-39_www.booking.com	2	0.0-0.0-0.520516356876516-0.0-0.0-0.0-0.0-0.0-0.0-0.0-0.0-0.0-0.0-0.0-0.0-0.0-0.0-0.4794836431234839-0.0-0.0-0.0
gpt2	average	Prior	fastcompany	23.8911	88	17_www.express.co.uk-39_www.booking.com	2	0.0-0.0-0.5385885709568519-0.0-0.0-0.0-0.0-0.0-0.0-0.0-0.0-0.0-0.0-0.0-0.0-0.0-0.0-0.4614114290431481-0.0-0.0-0.0
gpt2	ensemble	Prior	fastcompany	24.1333	88	17_www.express.co.uk-39_www.booking.com	2	0.0-0.0-0.5385885709568519-0.0-0.0-0.0-0.0-0.0-0.0-0.0-0.0-0.0-0.0-0.0-0.0-0.0-0.0-0.4614114290431481-0.0-0.0-0.0
gpt2	ensemble	Prior	fastcompany	23.2542	10	17_www.express.co.uk-39_www.booking.com-journals.plos.org	3	0.0-0.0-0.36239162867662816-0.0-0.0-0.0-0.0-0.0-0.0-0.0-0.0-0.0-0.0-0.0-0.0-0.0-0.0-0.3338240115988217-0.3037843597245501-0.0-0.0
gpt2	average	Prior	fastcompany	23.4926	42	17_www.express.co.uk-39_www.booking.com-journals.plos.org	3	0.0-0.0-0.36239162867662816-0.0-0.0-0.0-0.0-0.0-0.0-0.0-0.0-0.0-0.0-0.0-0.0-0.0-0.0-0.3338240115988217-0.3037843597245501-0.0-0.0
gpt2	ensemble	Prior	fastcompany	23.2542	42	17_www.express.co.uk-39_www.booking.com-journals.plos.org	3	0.0-0.0-0.36239162867662816-0.0-0.0-0.0-0.0-0.0-0.0-0.0-0.0-0.0-0.0-0.0-0.0-0.0-0.0-0.3338240115988217-0.3037843597245501-0.0-0.0
gpt2	average	Prior	fastcompany	22.7255	88	17_www.express.co.uk-91_www.entrepreneur.com-39_www.booking.com	3	0.0-0.0-0.37993762317381174-0.0-0.0-0.0-0.2945679807151909-0.0-0.0-0.0-0.0-0.0-0.0-0.0-0.0-0.0-0.0-0.32549439611099745-0.0-0.0-0.0
gpt2	ensemble	Prior	fastcompany	22.5828	88	17_www.express.co.uk-91_www.entrepreneur.com-39_www.booking.com	3	0.0-0.0-0.37993762317381174-0.0-0.0-0.0-0.2945679807151909-0.0-0.0-0.0-0.0-0.0-0.0-0.0-0.0-0.0-0.0-0.32549439611099745-0.0-0.0-0.0
gpt2	ensemble	Prior	fastcompany	22.3633	10	17_www.express.co.uk-91_www.entrepreneur.com-39_www.booking.com-journals.plos.org	4	0.0-0.0-0.27854220922585715-0.0-0.0-0.0-0.23137791498377056-0.0-0.0-0.0-0.0-0.0-0.0-0.0-0.0-0.0-0.0-0.2565845078235683-0.23349536796680398-0.0-0.0
gpt2	average	Prior	fastcompany	22.7487	42	17_www.express.co.uk-91_www.entrepreneur.com-39_www.booking.com-journals.plos.org	4	0.0-0.0-0.27854220922585715-0.0-0.0-0.0-0.23137791498377056-0.0-0.0-0.0-0.0-0.0-0.0-0.0-0.0-0.0-0.0-0.2565845078235683-0.23349536796680398-0.0-0.0
gpt2	ensemble	Prior	fastcompany	22.3633	42	17_www.express.co.uk-91_www.entrepreneur.com-39_www.booking.com-journals.plos.org	4	0.0-0.0-0.27854220922585715-0.0-0.0-0.0-0.23137791498377056-0.0-0.0-0.0-0.0-0.0-0.0-0.0-0.0-0.0-0.0-0.2565845078235683-0.23349536796680398-0.0-0.0
gpt2	average	Prior	fastcompany	22.8324	88	17_www.express.co.uk-81_www.librarything.com-91_www.entrepreneur.com-39_www.booking.com	4	0.0-0.0-0.29990010987947036-0.0-0.21065961466450048-0.0-0.23251440340522875-0.0-0.0-0.0-0.0-0.0-0.0-0.0-0.0-0.0-0.0-0.2569258720508004-0.0-0.0-0.0
gpt2	ensemble	Prior	fastcompany	22.4508	88	17_www.express.co.uk-81_www.librarything.com-91_www.entrepreneur.com-39_www.booking.com	4	0.0-0.0-0.29990010987947036-0.0-0.21065961466450048-0.0-0.23251440340522875-0.0-0.0-0.0-0.0-0.0-0.0-0.0-0.0-0.0-0.0-0.2569258720508004-0.0-0.0-0.0
gpt2	ensemble	Prior	fastcompany	21.9736	10	17_www.express.co.uk-81_www.librarything.com-91_www.entrepreneur.com-70_www.insiderpages.com-39_www.booking.com-journals.plos.org	6	0.0-0.0-0.19277155940728102-0.0-0.15874898535145637-0.0-0.16013042191268093-0.0-0.14917795346674137-0.0-0.0-0.0-0.0-0.0-0.0-0.0-0.0-0.177575225781283-0.1615958540805574-0.0-0.0
gpt2	average	Prior	fastcompany	23.2743	42	17_www.express.co.uk-81_www.librarything.com-91_www.entrepreneur.com-70_www.insiderpages.com-39_www.booking.com-journals.plos.org	6	0.0-0.0-0.19277155940728102-0.0-0.15874898535145637-0.0-0.16013042191268093-0.0-0.14917795346674137-0.0-0.0-0.0-0.0-0.0-0.0-0.0-0.0-0.177575225781283-0.1615958540805574-0.0-0.0
gpt2	ensemble	Prior	fastcompany	22.5387	42	17_www.express.co.uk-81_www.librarything.com-91_www.entrepreneur.com-70_www.insiderpages.com-39_www.booking.com-journals.plos.org	6	0.0-0.0-0.19277155940728102-0.0-0.15874898535145637-0.0-0.16013042191268093-0.0-0.14917795346674137-0.0-0.0-0.0-0.0-0.0-0.0-0.0-0.0-0.177575225781283-0.1615958540805574-0.0-0.0
gpt2	average	Prior	fastcompany	22.5072	88	15_www.dailymail.co.uk-17_www.express.co.uk-81_www.librarything.com-91_www.entrepreneur.com-85_www.pcworld.com-39_www.booking.com	6	0.14723171675779814-0.0-0.21171439950131968-0.0-0.14871509662266777-0.0-0.16414347868071727-0.0-0.0-0.0-0.0-0.0-0.0-0.0-0.1468185602280704-0.0-0.0-0.18137674820942673-0.0-0.0-0.0
gpt2	ensemble	Prior	fastcompany	21.9736	88	15_www.dailymail.co.uk-17_www.express.co.uk-81_www.librarything.com-91_www.entrepreneur.com-85_www.pcworld.com-39_www.booking.com	6	0.14723171675779814-0.0-0.21171439950131968-0.0-0.14871509662266777-0.0-0.16414347868071727-0.0-0.0-0.0-0.0-0.0-0.0-0.0-0.1468185602280704-0.0-0.0-0.18137674820942673-0.0-0.0-0.0
gpt2	ensemble	Prior	fastcompany	21.9308	10	15_www.dailymail.co.uk-17_www.express.co.uk-81_www.librarything.com-91_www.entrepreneur.com-85_www.pcworld.com-39_www.booking.com-www.frontiersin.org	7	0.12947740816131467-0.0-0.18618428366867573-0.0-0.13078191091691288-0.0-0.14434982253941303-0.0-0.0-0.0-0.0-0.0-0.0-0.0-0.12911407315570533-0.0-0.0-0.15950497471625863-0.0-0.1205875268417197-0.0
gpt2	average	Prior	fastcompany	22.5049	42	15_www.dailymail.co.uk-17_www.express.co.uk-81_www.librarything.com-91_www.entrepreneur.com-85_www.pcworld.com-39_www.booking.com-www.frontiersin.org	7	0.12947740816131467-0.0-0.18618428366867573-0.0-0.13078191091691288-0.0-0.14434982253941303-0.0-0.0-0.0-0.0-0.0-0.0-0.0-0.12911407315570533-0.0-0.0-0.15950497471625863-0.0-0.1205875268417197-0.0
gpt2	ensemble	Prior	fastcompany	21.9308	42	15_www.dailymail.co.uk-17_www.express.co.uk-81_www.librarything.com-91_www.entrepreneur.com-85_www.pcworld.com-39_www.booking.com-www.frontiersin.org	7	0.12947740816131467-0.0-0.18618428366867573-0.0-0.13078191091691288-0.0-0.14434982253941303-0.0-0.0-0.0-0.0-0.0-0.0-0.0-0.12911407315570533-0.0-0.0-0.15950497471625863-0.0-0.1205875268417197-0.0
gpt2	average	Prior	fastcompany	22.5049	88	15_www.dailymail.co.uk-17_www.express.co.uk-81_www.librarything.com-91_www.entrepreneur.com-85_www.pcworld.com-39_www.booking.com-www.frontiersin.org	7	0.12947740816131467-0.0-0.18618428366867573-0.0-0.13078191091691288-0.0-0.14434982253941303-0.0-0.0-0.0-0.0-0.0-0.0-0.0-0.12911407315570533-0.0-0.0-0.15950497471625863-0.0-0.1205875268417197-0.0
gpt2	ensemble	Prior	fastcompany	21.9308	88	15_www.dailymail.co.uk-17_www.express.co.uk-81_www.librarything.com-91_www.entrepreneur.com-85_www.pcworld.com-39_www.booking.com-www.frontiersin.org	7	0.12947740816131467-0.0-0.18618428366867573-0.0-0.13078191091691288-0.0-0.14434982253941303-0.0-0.0-0.0-0.0-0.0-0.0-0.0-0.12911407315570533-0.0-0.0-0.15950497471625863-0.0-0.1205875268417197-0.0
gpt2	ensemble	Prior	fastcompany	22.5387	10	17_www.express.co.uk-81_www.librarything.com-91_www.entrepreneur.com-70_www.insiderpages.com-22_forums.macrumors.com-39_www.booking.com-journals.plos.org-www.frontiersin.org	8	0.0-0.0-0.15053179565474314-0.0-0.12396418795801191-0.0-0.12504292657891447-0.0-0.11649034368189132-0.0-0.0-0.10968835347825269-0.0-0.0-0.0-0.0-0.0-0.13866525582322672-0.12618725583743648-0.10942988098752338-0.0
gpt2	average	Prior	fastcompany	22.6171	42	15_www.dailymail.co.uk-17_www.express.co.uk-81_www.librarything.com-37_www.instructables.com-91_www.entrepreneur.com-85_www.pcworld.com-39_www.booking.com-www.frontiersin.org	8	0.1160457741985991-0.0-0.16687003276297036-0.0-0.11721495138840655-0.10373727859906842-0.12937536478291586-0.0-0.0-0.0-0.0-0.0-0.0-0.0-0.11572013057769145-0.0-0.0-0.14295836271618076-0.0-0.10807810497416759-0.0
gpt2	ensemble	Prior	fastcompany	21.9736	42	15_www.dailymail.co.uk-17_www.express.co.uk-81_www.librarything.com-37_www.instructables.com-91_www.entrepreneur.com-85_www.pcworld.com-39_www.booking.com-www.frontiersin.org	8	0.1160457741985991-0.0-0.16687003276297036-0.0-0.11721495138840655-0.10373727859906842-0.12937536478291586-0.0-0.0-0.0-0.0-0.0-0.0-0.0-0.11572013057769145-0.0-0.0-0.14295836271618076-0.0-0.10807810497416759-0.0
gpt2	average	Prior	fastcompany	22.6171	88	15_www.dailymail.co.uk-17_www.express.co.uk-81_www.librarything.com-37_www.instructables.com-91_www.entrepreneur.com-85_www.pcworld.com-39_www.booking.com-www.frontiersin.org	8	0.1160457741985991-0.0-0.16687003276297036-0.0-0.11721495138840655-0.10373727859906842-0.12937536478291586-0.0-0.0-0.0-0.0-0.0-0.0-0.0-0.11572013057769145-0.0-0.0-0.14295836271618076-0.0-0.10807810497416759-0.0
gpt2	ensemble	Prior	fastcompany	21.9736	88	15_www.dailymail.co.uk-17_www.express.co.uk-81_www.librarything.com-37_www.instructables.com-91_www.entrepreneur.com-85_www.pcworld.com-39_www.booking.com-www.frontiersin.org	8	0.1160457741985991-0.0-0.16687003276297036-0.0-0.11721495138840655-0.10373727859906842-0.12937536478291586-0.0-0.0-0.0-0.0-0.0-0.0-0.0-0.11572013057769145-0.0-0.0-0.14295836271618076-0.0-0.10807810497416759-0.0
gpt2	ensemble	Prior	fastcompany	22.407	10	15_www.dailymail.co.uk-17_www.express.co.uk-81_www.librarything.com-91_www.entrepreneur.com-70_www.insiderpages.com-22_forums.macrumors.com-39_www.booking.com-journals.plos.org-www.frontiersin.org	9	0.09786373181821333-0.0-0.13580019237467328-0.0-0.11183258991262643-0.0-0.11280575914643103-0.0-0.1050901639283952-0.0-0.0-0.09895384186987558-0.0-0.0-0.0-0.0-0.0-0.1250949564148385-0.11383810007328532-0.09872066446166138-0.0
gpt2	average	Prior	fastcompany	22.6971	42	15_www.dailymail.co.uk-17_www.express.co.uk-45_www.npr.org-81_www.librarything.com-37_www.instructables.com-91_www.entrepreneur.com-85_www.pcworld.com-39_www.booking.com-www.frontiersin.org	9	0.10549526788565643-0.0-0.15169874930810137-0.09091676440442087-0.10655814726835114-0.09430582088072113-0.11761297522321149-0.0-0.0-0.0-0.0-0.0-0.0-0.0-0.10519923072911064-0.0-0.0-0.12996105093347202-0.0-0.09825199336695492-0.0
gpt2	ensemble	Prior	fastcompany	22.0166	42	15_www.dailymail.co.uk-17_www.express.co.uk-45_www.npr.org-81_www.librarything.com-37_www.instructables.com-91_www.entrepreneur.com-85_www.pcworld.com-39_www.booking.com-www.frontiersin.org	9	0.10549526788565643-0.0-0.15169874930810137-0.09091676440442087-0.10655814726835114-0.09430582088072113-0.11761297522321149-0.0-0.0-0.0-0.0-0.0-0.0-0.0-0.10519923072911064-0.0-0.0-0.12996105093347202-0.0-0.09825199336695492-0.0
gpt2	average	Prior	fastcompany	22.6971	88	15_www.dailymail.co.uk-17_www.express.co.uk-45_www.npr.org-81_www.librarything.com-37_www.instructables.com-91_www.entrepreneur.com-85_www.pcworld.com-39_www.booking.com-www.frontiersin.org	9	0.10549526788565643-0.0-0.15169874930810137-0.09091676440442087-0.10655814726835114-0.09430582088072113-0.11761297522321149-0.0-0.0-0.0-0.0-0.0-0.0-0.0-0.10519923072911064-0.0-0.0-0.12996105093347202-0.0-0.09825199336695492-0.0
gpt2	ensemble	Prior	fastcompany	22.0166	88	15_www.dailymail.co.uk-17_www.express.co.uk-45_www.npr.org-81_www.librarything.com-37_www.instructables.com-91_www.entrepreneur.com-85_www.pcworld.com-39_www.booking.com-www.frontiersin.org	9	0.10549526788565643-0.0-0.15169874930810137-0.09091676440442087-0.10655814726835114-0.09430582088072113-0.11761297522321149-0.0-0.0-0.0-0.0-0.0-0.0-0.0-0.10519923072911064-0.0-0.0-0.12996105093347202-0.0-0.09825199336695492-0.0
gpt2	ensemble	Prior	fastcompany	22.0166	10	15_www.dailymail.co.uk-17_www.express.co.uk-45_www.npr.org-81_www.librarything.com-37_www.instructables.com-91_www.entrepreneur.com-77_www.androidheadlines.com-85_www.pcworld.com-39_www.booking.com-www.frontiersin.org	10	0.09670743952914704-0.0-0.139062139178236-0.08334333541250413-0.09768178032839629-0.08645008115391413-0.10781573351299348-0.0-0.0-0.0-0.0-0.0-0.0833006876292717-0.0-0.09643606247130532-0.0-0.0-0.11913520602569098-0.0-0.09006753475854093-0.0
gpt2	average	Prior	fastcompany	22.7435	42	15_www.dailymail.co.uk-17_www.express.co.uk-45_www.npr.org-81_www.librarything.com-37_www.instructables.com-91_www.entrepreneur.com-77_www.androidheadlines.com-85_www.pcworld.com-39_www.booking.com-www.frontiersin.org	10	0.09670743952914704-0.0-0.139062139178236-0.08334333541250413-0.09768178032839629-0.08645008115391413-0.10781573351299348-0.0-0.0-0.0-0.0-0.0-0.0833006876292717-0.0-0.09643606247130532-0.0-0.0-0.11913520602569098-0.0-0.09006753475854093-0.0
gpt2	ensemble	Prior	fastcompany	22.0166	42	15_www.dailymail.co.uk-17_www.express.co.uk-45_www.npr.org-81_www.librarything.com-37_www.instructables.com-91_www.entrepreneur.com-77_www.androidheadlines.com-85_www.pcworld.com-39_www.booking.com-www.frontiersin.org	10	0.09670743952914704-0.0-0.139062139178236-0.08334333541250413-0.09768178032839629-0.08645008115391413-0.10781573351299348-0.0-0.0-0.0-0.0-0.0-0.0833006876292717-0.0-0.09643606247130532-0.0-0.0-0.11913520602569098-0.0-0.09006753475854093-0.0
gpt2	average	Prior	fastcompany	22.7435	88	15_www.dailymail.co.uk-17_www.express.co.uk-45_www.npr.org-81_www.librarything.com-37_www.instructables.com-91_www.entrepreneur.com-77_www.androidheadlines.com-85_www.pcworld.com-39_www.booking.com-www.frontiersin.org	10	0.09670743952914704-0.0-0.139062139178236-0.08334333541250413-0.09768178032839629-0.08645008115391413-0.10781573351299348-0.0-0.0-0.0-0.0-0.0-0.0833006876292717-0.0-0.09643606247130532-0.0-0.0-0.11913520602569098-0.0-0.09006753475854093-0.0
gpt2	ensemble	Prior	fastcompany	22.0166	88	15_www.dailymail.co.uk-17_www.express.co.uk-45_www.npr.org-81_www.librarything.com-37_www.instructables.com-91_www.entrepreneur.com-77_www.androidheadlines.com-85_www.pcworld.com-39_www.booking.com-www.frontiersin.org	10	0.09670743952914704-0.0-0.139062139178236-0.08334333541250413-0.09768178032839629-0.08645008115391413-0.10781573351299348-0.0-0.0-0.0-0.0-0.0-0.0833006876292717-0.0-0.09643606247130532-0.0-0.0-0.11913520602569098-0.0-0.09006753475854093-0.0
gpt2	average	Entropy-topk-uniform	fastcompany	21.6084	5	15_www.dailymail.co.uk-78_www.wired.com-91_www.entrepreneur.com-85_www.pcworld.com-60_www.csmonitor.com-58_medium.com	6	0.16666666666666666-0.16666666666666666-0.0-0.0-0.0-0.0-0.16666666666666666-0.0-0.0-0.0-0.0-0.0-0.0-0.0-0.16666666666666666-0.16666666666666666-0.0-0.0-0.0-0.0-0.16666666666666666
gpt2	ensemble	Entropy-topk-uniform	fastcompany	21.1318	5	15_www.dailymail.co.uk-78_www.wired.com-91_www.entrepreneur.com-85_www.pcworld.com-60_www.csmonitor.com-58_medium.com	6	0.16666666666666666-0.16666666666666666-0.0-0.0-0.0-0.0-0.16666666666666666-0.0-0.0-0.0-0.0-0.0-0.0-0.0-0.16666666666666666-0.16666666666666666-0.0-0.0-0.0-0.0-0.16666666666666666
gpt2	average	Entropy-topk-uniform	fastcompany		42		6
gpt2	ensemble	Entropy-topk-uniform	fastcompany		42		6
gpt2	average	Entropy-topk-uniform	fastcompany		88		6
gpt2	ensemble	Entropy-topk-uniform	fastcompany		88		6
gpt2	average	Entropy-topk-uniform	fastcompany	21.7767	5	15_www.dailymail.co.uk-78_www.wired.com-17_www.express.co.uk-91_www.entrepreneur.com-85_www.pcworld.com-60_www.csmonitor.com-58_medium.com	7	0.14285714285714285-0.14285714285714285-0.14285714285714285-0.0-0.0-0.0-0.14285714285714285-0.0-0.0-0.0-0.0-0.0-0.0-0.0-0.14285714285714285-0.14285714285714285-0.0-0.0-0.0-0.0-0.14285714285714285
gpt2	ensemble	Entropy-topk-uniform	fastcompany	21.256	5	15_www.dailymail.co.uk-78_www.wired.com-17_www.express.co.uk-91_www.entrepreneur.com-85_www.pcworld.com-60_www.csmonitor.com-58_medium.com	7	0.14285714285714285-0.14285714285714285-0.14285714285714285-0.0-0.0-0.0-0.14285714285714285-0.0-0.0-0.0-0.0-0.0-0.0-0.0-0.14285714285714285-0.14285714285714285-0.0-0.0-0.0-0.0-0.14285714285714285
gpt2	average	Entropy-topk-uniform	fastcompany		42		7
gpt2	ensemble	Entropy-topk-uniform	fastcompany		42		7
gpt2	average	Entropy-topk-uniform	fastcompany		88		7
gpt2	ensemble	Entropy-topk-uniform	fastcompany		88		7
gpt2	average	Entropy-topk-uniform	fastcompany	21.8924	5	15_www.dailymail.co.uk-78_www.wired.com-17_www.express.co.uk-45_www.npr.org-91_www.entrepreneur.com-85_www.pcworld.com-60_www.csmonitor.com-58_medium.com	8	0.125-0.125-0.125-0.125-0.0-0.0-0.125-0.0-0.0-0.0-0.0-0.0-0.0-0.0-0.125-0.125-0.0-0.0-0.0-0.0-0.125
gpt2	ensemble	Entropy-topk-uniform	fastcompany	21.3392	5	15_www.dailymail.co.uk-78_www.wired.com-17_www.express.co.uk-45_www.npr.org-91_www.entrepreneur.com-85_www.pcworld.com-60_www.csmonitor.com-58_medium.com	8	0.125-0.125-0.125-0.125-0.0-0.0-0.125-0.0-0.0-0.0-0.0-0.0-0.0-0.0-0.125-0.125-0.0-0.0-0.0-0.0-0.125
gpt2	average	Entropy-topk-uniform	fastcompany		42		8
gpt2	ensemble	Entropy-topk-uniform	fastcompany		42		8
gpt2	average	Entropy-topk-uniform	fastcompany		88		8
gpt2	ensemble	Entropy-topk-uniform	fastcompany		88		8
gpt2	average	Entropy-topk-uniform	fastcompany	21.9889	5	15_www.dailymail.co.uk-78_www.wired.com-17_www.express.co.uk-45_www.npr.org-91_www.entrepreneur.com-77_www.androidheadlines.com-85_www.pcworld.com-60_www.csmonitor.com-58_medium.com	9	0.1111111111111111-0.1111111111111111-0.1111111111111111-0.1111111111111111-0.0-0.0-0.1111111111111111-0.0-0.0-0.0-0.0-0.0-0.1111111111111111-0.0-0.1111111111111111-0.1111111111111111-0.0-0.0-0.0-0.0-0.1111111111111111
gpt2	ensemble	Entropy-topk-uniform	fastcompany	21.4227	5	15_www.dailymail.co.uk-78_www.wired.com-17_www.express.co.uk-45_www.npr.org-91_www.entrepreneur.com-77_www.androidheadlines.com-85_www.pcworld.com-60_www.csmonitor.com-58_medium.com	9	0.1111111111111111-0.1111111111111111-0.1111111111111111-0.1111111111111111-0.0-0.0-0.1111111111111111-0.0-0.0-0.0-0.0-0.0-0.1111111111111111-0.0-0.1111111111111111-0.1111111111111111-0.0-0.0-0.0-0.0-0.1111111111111111
gpt2	average	Entropy-topk-uniform	fastcompany		42		9
gpt2	ensemble	Entropy-topk-uniform	fastcompany		42		9
gpt2	average	Entropy-topk-uniform	fastcompany		88		9
gpt2	ensemble	Entropy-topk-uniform	fastcompany		88		9
gpt2	average	Entropy-topk-uniform	fastcompany	22.0502	5	15_www.dailymail.co.uk-78_www.wired.com-17_www.express.co.uk-45_www.npr.org-91_www.entrepreneur.com-100_www.ign.com-77_www.androidheadlines.com-85_www.pcworld.com-60_www.csmonitor.com-58_medium.com	10	0.1-0.1-0.1-0.1-0.0-0.0-0.1-0.0-0.0-0.1-0.0-0.0-0.1-0.0-0.1-0.1-0.0-0.0-0.0-0.0-0.1
gpt2	ensemble	Entropy-topk-uniform	fastcompany	21.4646	5	15_www.dailymail.co.uk-78_www.wired.com-17_www.express.co.uk-45_www.npr.org-91_www.entrepreneur.com-100_www.ign.com-77_www.androidheadlines.com-85_www.pcworld.com-60_www.csmonitor.com-58_medium.com	10	0.1-0.1-0.1-0.1-0.0-0.0-0.1-0.0-0.0-0.1-0.0-0.0-0.1-0.0-0.1-0.1-0.0-0.0-0.0-0.0-0.1
gpt2	average	Entropy-topk-uniform	fastcompany		42		10
gpt2	ensemble	Entropy-topk-uniform	fastcompany		42		10
gpt2	average	Entropy-topk-uniform	fastcompany		88		10
gpt2	ensemble	Entropy-topk-uniform	fastcompany		88		10
deberta	ensemble	Entropy-topk-uniform	fastcompany	3.72271	5	15_www.dailymail.co.uk-78_www.wired.com-45_www.npr.org-60_www.csmonitor.com-journals.plos.org	5	0.2-0.2-0.0-0.2-0.0-0.0-0.0-0.0-0.0-0.0-0.0-0.0-0.0-0.0-0.0-0.2-0.0-0.0-0.2-0.0-0.0
deberta	ensemble	Entropy-topk-uniform	fastcompany	3.74825	5	15_www.dailymail.co.uk-78_www.wired.com-45_www.npr.org-60_www.csmonitor.com-journals.plos.org-www.frontiersin.org	6	0.16666666666666666-0.16666666666666666-0.0-0.16666666666666666-0.0-0.0-0.0-0.0-0.0-0.0-0.0-0.0-0.0-0.0-0.0-0.16666666666666666-0.0-0.0-0.16666666666666666-0.16666666666666666-0.0
deberta	ensemble	Entropy-topk-uniform	fastcompany	3.74825	5	15_www.dailymail.co.uk-78_www.wired.com-45_www.npr.org-91_www.entrepreneur.com-60_www.csmonitor.com-journals.plos.org-www.frontiersin.org	7	0.14285714285714285-0.14285714285714285-0.0-0.14285714285714285-0.0-0.0-0.14285714285714285-0.0-0.0-0.0-0.0-0.0-0.0-0.0-0.0-0.14285714285714285-0.0-0.0-0.14285714285714285-0.14285714285714285-0.0
deberta	ensemble	Entropy-topk-uniform	fastcompany	3.77396	5	15_www.dailymail.co.uk-78_www.wired.com-45_www.npr.org-91_www.entrepreneur.com-11_link.springer.com-60_www.csmonitor.com-journals.plos.org-www.frontiersin.org	8	0.125-0.125-0.0-0.125-0.0-0.0-0.125-0.125-0.0-0.0-0.0-0.0-0.0-0.0-0.0-0.125-0.0-0.0-0.125-0.125-0.0
deberta	ensemble	Entropy-topk-uniform	fastcompany	3.78503	5	15_www.dailymail.co.uk-78_www.wired.com-45_www.npr.org-91_www.entrepreneur.com-11_link.springer.com-85_www.pcworld.com-60_www.csmonitor.com-journals.plos.org-www.frontiersin.org	9	0.1111111111111111-0.1111111111111111-0.0-0.1111111111111111-0.0-0.0-0.1111111111111111-0.1111111111111111-0.0-0.0-0.0-0.0-0.0-0.0-0.1111111111111111-0.1111111111111111-0.0-0.0-0.1111111111111111-0.1111111111111111-0.0
deberta	ensemble	Entropy-topk-uniform	fastcompany	3.80356	5	15_www.dailymail.co.uk-78_www.wired.com-45_www.npr.org-37_www.instructables.com-91_www.entrepreneur.com-11_link.springer.com-85_www.pcworld.com-60_www.csmonitor.com-journals.plos.org-www.frontiersin.org	10	0.1-0.1-0.0-0.1-0.0-0.1-0.1-0.1-0.0-0.0-0.0-0.0-0.0-0.0-0.1-0.1-0.0-0.0-0.1-0.1-0.0
deberta	ensemble	Entropy-topk-uniform	fastcompany	3.72271	42	15_www.dailymail.co.uk-78_www.wired.com-45_www.npr.org-60_www.csmonitor.com-journals.plos.org	5	0.2-0.2-0.0-0.2-0.0-0.0-0.0-0.0-0.0-0.0-0.0-0.0-0.0-0.0-0.0-0.2-0.0-0.0-0.2-0.0-0.0
deberta	ensemble	Entropy-topk-uniform	fastcompany	3.74825	42	15_www.dailymail.co.uk-78_www.wired.com-45_www.npr.org-60_www.csmonitor.com-journals.plos.org-www.frontiersin.org	6	0.16666666666666666-0.16666666666666666-0.0-0.16666666666666666-0.0-0.0-0.0-0.0-0.0-0.0-0.0-0.0-0.0-0.0-0.0-0.16666666666666666-0.0-0.0-0.16666666666666666-0.16666666666666666-0.0
deberta	ensemble	Entropy-topk-uniform	fastcompany	3.75191	42	15_www.dailymail.co.uk-78_www.wired.com-45_www.npr.org-91_www.entrepreneur.com-60_www.csmonitor.com-journals.plos.org-www.frontiersin.org	7	0.14285714285714285-0.14285714285714285-0.0-0.14285714285714285-0.0-0.0-0.14285714285714285-0.0-0.0-0.0-0.0-0.0-0.0-0.0-0.0-0.14285714285714285-0.0-0.0-0.14285714285714285-0.14285714285714285-0.0
deberta	ensemble	Entropy-topk-uniform	fastcompany	3.77765	42	15_www.dailymail.co.uk-78_www.wired.com-45_www.npr.org-91_www.entrepreneur.com-11_link.springer.com-60_www.csmonitor.com-journals.plos.org-www.frontiersin.org	8	0.125-0.125-0.0-0.125-0.0-0.0-0.125-0.125-0.0-0.0-0.0-0.0-0.0-0.0-0.0-0.125-0.0-0.0-0.125-0.125-0.0
deberta	ensemble	Entropy-topk-uniform	fastcompany	3.78873	42	15_www.dailymail.co.uk-78_www.wired.com-45_www.npr.org-91_www.entrepreneur.com-11_link.springer.com-85_www.pcworld.com-60_www.csmonitor.com-journals.plos.org-www.frontiersin.org	9	0.1111111111111111-0.1111111111111111-0.0-0.1111111111111111-0.0-0.0-0.1111111111111111-0.1111111111111111-0.0-0.0-0.0-0.0-0.0-0.0-0.1111111111111111-0.1111111111111111-0.0-0.0-0.1111111111111111-0.1111111111111111-0.0
gpt2-large	average	TF-IDF	fastcompany	15.2702	5	15_www.dailymail.co.uk-78_www.wired.com-17_www.express.co.uk-45_www.npr.org-81_www.librarything.com-91_www.entrepreneur.com-11_link.springer.com-100_www.ign.com-10_www.eventbrite.com-77_www.androidheadlines.com-84_www.glassdoor.com-85_www.pcworld.com-60_www.csmonitor.com-99_www.lonelyplanet.com-58_medium.com	15	0.06076042670795162-0.08903023454161907-0.07871646992274138-0.044146055204314125-0.05908366584679543-0.0-0.0938165119351359-0.043961232980403726-0.0-0.0627073312256456-0.06889996684796729-0.0-0.05186624244548093-0.05144121339304783-0.08167693603248703-0.05318840582631789-0.06031994496366429-0.0-0.0-0.0-0.10038536212642786
gpt2-large	ensemble	TF-IDF	fastcompany	14.5805	5	15_www.dailymail.co.uk-78_www.wired.com-17_www.express.co.uk-45_www.npr.org-81_www.librarything.com-91_www.entrepreneur.com-11_link.springer.com-100_www.ign.com-10_www.eventbrite.com-77_www.androidheadlines.com-84_www.glassdoor.com-85_www.pcworld.com-60_www.csmonitor.com-99_www.lonelyplanet.com-58_medium.com	15	0.06076042670795162-0.08903023454161907-0.07871646992274138-0.044146055204314125-0.05908366584679543-0.0-0.0938165119351359-0.043961232980403726-0.0-0.0627073312256456-0.06889996684796729-0.0-0.05186624244548093-0.05144121339304783-0.08167693603248703-0.05318840582631789-0.06031994496366429-0.0-0.0-0.0-0.10038536212642786
gpt2-large	average	Sentence Sim	fastcompany	15.1918	5	15_www.dailymail.co.uk-78_www.wired.com-45_www.npr.org-91_www.entrepreneur.com-10_www.eventbrite.com-77_www.androidheadlines.com-84_www.glassdoor.com-85_www.pcworld.com-60_www.csmonitor.com-58_medium.com	10	0.06889337935552674-0.113609304641105-0.0-0.09555384299981878-0.0-0.0-0.13552189478229423-0.0-0.0-0.0-0.0995897913695477-0.0-0.0901365743425089-0.09607070315925637-0.10213110955052168-0.08881259220696436-0.0-0.0-0.0-0.0-0.10968080759245637
gpt2-large	ensemble	Sentence Sim	fastcompany	14.5237	5	15_www.dailymail.co.uk-78_www.wired.com-45_www.npr.org-91_www.entrepreneur.com-10_www.eventbrite.com-77_www.androidheadlines.com-84_www.glassdoor.com-85_www.pcworld.com-60_www.csmonitor.com-58_medium.com	10	0.06889337935552674-0.113609304641105-0.0-0.09555384299981878-0.0-0.0-0.13552189478229423-0.0-0.0-0.0-0.0995897913695477-0.0-0.0901365743425089-0.09607070315925637-0.10213110955052168-0.08881259220696436-0.0-0.0-0.0-0.0-0.10968080759245637
gpt2			fool	23.4027	5
gpt2	average	uniform	fool	21.3409	5		21
gpt2	average	Sentence Sim	fool	21.2046	5		21	0.038075723179476384-0.0774003714792624-0.04709579832782484-0.07393575298093336-0.021269208101694637-0.0-0.10780246416885572-0.002100683773668261-0.05850125984399159-0.02297805664147042-0.04965906307695995-0.05038711896188106-0.09237127559446266-0.10013686154725789-0.09655930438373314-0.05984742335359882-0.00193911098356852-0.017223590830660145-0.007065256516175173-0.007502143579136335-0.06814953…
gpt2	average	TF-IDF	fool	21.2847	5		21	0.04894279485375327-0.060408847804004434-0.03348179355226832-0.05415299543570481-0.045222022668240595-0.044689466160296405-0.06556344591634453-0.04190995914338235-0.045761417340176566-0.04700913319178812-0.04951399940345868-0.05222917625492123-0.05850784600115717-0.053279381888272935-0.061274304913733195-0.05946368400637204-0.03072109606152885-0.027230715671902748-0.038244244551705366-0.031802498…
gpt2	average	Entropy	fool	21.3406	5		21	0.047675023105360446-0.04765480591497227-0.04764325323475046-0.04770246072088725-0.047565272643253234-0.04762014787430684-0.04766780268022181-0.04758693391866913-0.047556608133086875-0.04765480591497227-0.04757826940850277-0.04761581561922366-0.047669246765249536-0.04757104898336414-0.047679355360443626-0.04765191774491682-0.04753927911275416-0.04750895332717191-0.04762736829944547-0.047586933918…
gpt2	ensemble	uniform	fool	21.2976	5		21
gpt2	ensemble	Sentence Sim	fool	21.1318	5		21	0.038075723179476384-0.0774003714792624-0.04709579832782484-0.07393575298093336-0.021269208101694637-0.0-0.10780246416885572-0.002100683773668261-0.05850125984399159-0.02297805664147042-0.04965906307695995-0.05038711896188106-0.09237127559446266-0.10013686154725789-0.09655930438373314-0.05984742335359882-0.00193911098356852-0.017223590830660145-0.007065256516175173-0.007502143579136335-0.06814953…
gpt2	ensemble	TF-IDF	fool	21.2146	5		21	0.04894279485375327-0.060408847804004434-0.03348179355226832-0.05415299543570481-0.045222022668240595-0.044689466160296405-0.06556344591634453-0.04190995914338235-0.045761417340176566-0.04700913319178812-0.04951399940345868-0.05222917625492123-0.05850784600115717-0.053279381888272935-0.061274304913733195-0.05946368400637204-0.03072109606152885-0.027230715671902748-0.038244244551705366-0.031802498…
gpt2	ensemble	Entropy	fool	21.2976	5		21	0.047675023105360446-0.04765480591497227-0.04764325323475046-0.04770246072088725-0.047565272643253234-0.04762014787430684-0.04766780268022181-0.04758693391866913-0.047556608133086875-0.04765480591497227-0.04757826940850277-0.04761581561922366-0.047669246765249536-0.04757104898336414-0.047679355360443626-0.04765191774491682-0.04753927911275416-0.04750895332717191-0.04762736829944547-0.047586933918…
deberta			fool	166698	5
gpt2-large			fool	15.7114	5
gpt2-large	average	uniform	fool	14.9185	5		21
gpt2-large	ensemble	uniform	fool	14.4388	5		21
gpt2	ensemble	uniform	fool	21.2976	10		21
gpt2-large	average	TF-IDF	fool	14.9225	5		21	0.04894279485375327-0.060408847804004434-0.03348179355226832-0.05415299543570481-0.045222022668240595-0.044689466160296405-0.06556344591634453-0.04190995914338235-0.045761417340176566-0.04700913319178812-0.04951399940345868-0.05222917625492123-0.05850784600115717-0.053279381888272935-0.061274304913733195-0.05946368400637204-0.03072109606152885-0.027230715671902748-0.038244244551705366-0.031802498…
gpt2	ensemble	uniform	fool	21.2976	42		21
gpt2-large	average	uniform	fool	14.9185	10		21
gpt2-large	ensemble	uniform	fool	14.4388	10		21
gpt2	average	uniform	fool	21.3409	42		21
gpt2	ensemble	TF-IDF	fool	21.2146	42		21	0.05078380218784323-0.060686197996230144-0.03945261428551191-0.05632224698411288-0.04233648340532969-0.04625697974696495-0.06421918339028615-0.038969130442269205-0.047059001254637786-0.04839112759083017-0.049775895138931006-0.051429830829923834-0.05549213988214-0.05330578163986111-0.058264577623176106-0.05659152910814584-0.029572068455786565-0.03184683680355703-0.036836969031429-0.030012618068299…
gpt2	average	TF-IDF	fool	21.2866	42		21	0.05078380218784323-0.060686197996230144-0.03945261428551191-0.05632224698411288-0.04233648340532969-0.04625697974696495-0.06421918339028615-0.038969130442269205-0.047059001254637786-0.04839112759083017-0.049775895138931006-0.051429830829923834-0.05549213988214-0.05330578163986111-0.058264577623176106-0.05659152910814584-0.029572068455786565-0.03184683680355703-0.036836969031429-0.030012618068299…
gpt2	ensemble	Sentence Sim	fool	21.1732	42		21	0.03874710389683265-0.08004504973838515-0.05052176035043541-0.06754136050560797-0.0258178285108104-0.0027681283184338625-0.09748409355202282-0.011564597217044772-0.05690563004460318-0.021067965654708188-0.05144173233615585-0.04930235960470643-0.09524546870528953-0.0961005937933903-0.0954058927544324-0.052551874050550354-0.00258069201097381-0.017879401217047328-0.011921005071293922-0.0108849929972…
gpt2	average	uniform	fool	21.3409	10		21
gpt2	ensemble	TF-IDF	fool	21.2146	10		21	0.05338893777727303-0.0608046543199801-0.034320027670290555-0.05801285543090652-0.04519454755158306-0.044926144050205064-0.06063630878669661-0.038681003670681606-0.044401333563065096-0.046489895912538604-0.04732693997266211-0.056500652894193815-0.05814850385693208-0.05609011133055195-0.057043062557635964-0.06159844124459624-0.030858755032736742-0.02818267706400701-0.039988052344968404-0.032596880…
gpt2	average	TF-IDF	fool	21.2867	10		21	0.05338893777727303-0.0608046543199801-0.034320027670290555-0.05801285543090652-0.04519454755158306-0.044926144050205064-0.06063630878669661-0.038681003670681606-0.044401333563065096-0.046489895912538604-0.04732693997266211-0.056500652894193815-0.05814850385693208-0.05609011133055195-0.057043062557635964-0.06159844124459624-0.030858755032736742-0.02818267706400701-0.039988052344968404-0.032596880…
gpt2	ensemble	Sentence Sim	fool	21.1318	10		21	0.04194370720533583-0.07507355298847486-0.04517738933676815-0.05954697715853361-0.02026578407450656-0.0-0.10504757115695186-0.008054860355569737-0.05343247976805571-0.0294570949145642-0.051443207910857214-0.054779210869552654-0.10425284858338309-0.09991387356992694-0.0921966311396844-0.0646851732881572-0.0-0.011277585334652944-0.010989528900075147-0.005157234594068788-0.06730528885088097
gpt2	average	Sentence Sim	fool	21.2173	42		21	0.03874710389683265-0.08004504973838515-0.05052176035043541-0.06754136050560797-0.0258178285108104-0.0027681283184338625-0.09748409355202282-0.011564597217044772-0.05690563004460318-0.021067965654708188-0.05144173233615585-0.04930235960470643-0.09524546870528953-0.0961005937933903-0.0954058927544324-0.052551874050550354-0.00258069201097381-0.017879401217047328-0.011921005071293922-0.0108849929972…
gpt2	average	Sentence Sim	fool	21.2057	10		21	0.04194370720533583-0.07507355298847486-0.04517738933676815-0.05954697715853361-0.02026578407450656-0.0-0.10504757115695186-0.008054860355569737-0.05343247976805571-0.0294570949145642-0.051443207910857214-0.054779210869552654-0.10425284858338309-0.09991387356992694-0.0921966311396844-0.0646851732881572-0.0-0.011277585334652944-0.010989528900075147-0.005157234594068788-0.06730528885088097
gpt2	ensemble	Prior	fool	21.3809	10		21	0.041534423828125-0.03961181640625-0.046783447265625-0.039154052734375-0.05059814453125-0.0499267578125-0.039794921875-0.0479736328125-0.059234619140625-0.041015625-0.04791259765625-0.052154541015625-0.04583740234375-0.0543212890625-0.038970947265625-0.0404052734375-0.046295166015625-0.0775146484375-0.047027587890625-0.049713134765625-0.044189453125
gpt2	average	Prior	fool	21.3844	10		21	0.041534423828125-0.03961181640625-0.046783447265625-0.039154052734375-0.05059814453125-0.0499267578125-0.039794921875-0.0479736328125-0.059234619140625-0.041015625-0.04791259765625-0.052154541015625-0.04583740234375-0.0543212890625-0.038970947265625-0.0404052734375-0.046295166015625-0.0775146484375-0.047027587890625-0.049713134765625-0.044189453125
gpt2	ensemble	Entropy	fool	21.2976	10		21	0.047675023105360446-0.04765480591497227-0.04764325323475046-0.04770246072088725-0.047565272643253234-0.04762014787430684-0.04766780268022181-0.04758693391866913-0.047556608133086875-0.04765480591497227-0.04757826940850277-0.04761581561922366-0.047669246765249536-0.04757104898336414-0.047679355360443626-0.04765191774491682-0.04753927911275416-0.04750895332717191-0.04762736829944547-0.047586933918…
gpt2	average	Entropy	fool	21.3406	10		21	0.047675023105360446-0.04765480591497227-0.04764325323475046-0.04770246072088725-0.047565272643253234-0.04762014787430684-0.04766780268022181-0.04758693391866913-0.047556608133086875-0.04765480591497227-0.04757826940850277-0.04761581561922366-0.047669246765249536-0.04757104898336414-0.047679355360443626-0.04765191774491682-0.04753927911275416-0.04750895332717191-0.04762736829944547-0.047586933918…
gpt2	ensemble	Prior	fool	21.3809	42		21	0.041534423828125-0.03961181640625-0.046783447265625-0.039154052734375-0.05059814453125-0.0499267578125-0.039794921875-0.0479736328125-0.059234619140625-0.041015625-0.04791259765625-0.052154541015625-0.04583740234375-0.0543212890625-0.038970947265625-0.0404052734375-0.046295166015625-0.0775146484375-0.047027587890625-0.049713134765625-0.044189453125
gpt2	average	Prior	fool	21.3844	42		21	0.041534423828125-0.03961181640625-0.046783447265625-0.039154052734375-0.05059814453125-0.0499267578125-0.039794921875-0.0479736328125-0.059234619140625-0.041015625-0.04791259765625-0.052154541015625-0.04583740234375-0.0543212890625-0.038970947265625-0.0404052734375-0.046295166015625-0.0775146484375-0.047027587890625-0.049713134765625-0.044189453125
gpt2	ensemble	Entropy	fool	21.2976	42		21	0.047675023105360446-0.04765480591497227-0.04764325323475046-0.04770246072088725-0.047565272643253234-0.04762014787430684-0.04766780268022181-0.04758693391866913-0.047556608133086875-0.04765480591497227-0.04757826940850277-0.04761581561922366-0.047669246765249536-0.04757104898336414-0.047679355360443626-0.04765191774491682-0.04753927911275416-0.04750895332717191-0.04762736829944547-0.047586933918…
gpt2	average	Entropy	fool	21.3406	42		21	0.047675023105360446-0.04765480591497227-0.04764325323475046-0.04770246072088725-0.047565272643253234-0.04762014787430684-0.04766780268022181-0.04758693391866913-0.047556608133086875-0.04765480591497227-0.04757826940850277-0.04761581561922366-0.047669246765249536-0.04757104898336414-0.047679355360443626-0.04765191774491682-0.04753927911275416-0.04750895332717191-0.04762736829944547-0.047586933918…
gpt2-large	ensemble	TF-IDF	fool	14.3825	5		21	0.04894279485375327-0.060408847804004434-0.03348179355226832-0.05415299543570481-0.045222022668240595-0.044689466160296405-0.06556344591634453-0.04190995914338235-0.045761417340176566-0.04700913319178812-0.04951399940345868-0.05222917625492123-0.05850784600115717-0.053279381888272935-0.061274304913733195-0.05946368400637204-0.03072109606152885-0.027230715671902748-0.038244244551705366-0.031802498…
gpt2-large	average	Sentence Sim	fool	14.8573	5		21	0.038075723179476384-0.0774003714792624-0.04709579832782484-0.07393575298093336-0.021269208101694637-0.0-0.10780246416885572-0.002100683773668261-0.05850125984399159-0.02297805664147042-0.04965906307695995-0.05038711896188106-0.09237127559446266-0.10013686154725789-0.09655930438373314-0.05984742335359882-0.00193911098356852-0.017223590830660145-0.007065256516175173-0.007502143579136335-0.06814953…
gpt2-large	average	TF-IDF	fool	14.9307	10		21	0.05338893777727303-0.0608046543199801-0.034320027670290555-0.05801285543090652-0.04519454755158306-0.044926144050205064-0.06063630878669661-0.038681003670681606-0.044401333563065096-0.046489895912538604-0.04732693997266211-0.056500652894193815-0.05814850385693208-0.05609011133055195-0.057043062557635964-0.06159844124459624-0.030858755032736742-0.02818267706400701-0.039988052344968404-0.032596880…
gpt2-large	ensemble	TF-IDF	fool	14.3825	10		21	0.05338893777727303-0.0608046543199801-0.034320027670290555-0.05801285543090652-0.04519454755158306-0.044926144050205064-0.06063630878669661-0.038681003670681606-0.044401333563065096-0.046489895912538604-0.04732693997266211-0.056500652894193815-0.05814850385693208-0.05609011133055195-0.057043062557635964-0.06159844124459624-0.030858755032736742-0.02818267706400701-0.039988052344968404-0.032596880…
gpt2-large	ensemble	Sentence Sim	fool	14.3545	5		21	0.038075723179476384-0.0774003714792624-0.04709579832782484-0.07393575298093336-0.021269208101694637-0.0-0.10780246416885572-0.002100683773668261-0.05850125984399159-0.02297805664147042-0.04965906307695995-0.05038711896188106-0.09237127559446266-0.10013686154725789-0.09655930438373314-0.05984742335359882-0.00193911098356852-0.017223590830660145-0.007065256516175173-0.007502143579136335-0.06814953…
gpt2-large	average	Sentence Sim	fool	14.8558	10		21	0.04194370720533583-0.07507355298847486-0.04517738933676815-0.05954697715853361-0.02026578407450656-0.0-0.10504757115695186-0.008054860355569737-0.05343247976805571-0.0294570949145642-0.051443207910857214-0.054779210869552654-0.10425284858338309-0.09991387356992694-0.0921966311396844-0.0646851732881572-0.0-0.011277585334652944-0.010989528900075147-0.005157234594068788-0.06730528885088097
gpt2-large	ensemble	Sentence Sim	fool	14.3545	10		21	0.04194370720533583-0.07507355298847486-0.04517738933676815-0.05954697715853361-0.02026578407450656-0.0-0.10504757115695186-0.008054860355569737-0.05343247976805571-0.0294570949145642-0.051443207910857214-0.054779210869552654-0.10425284858338309-0.09991387356992694-0.0921966311396844-0.0646851732881572-0.0-0.011277585334652944-0.010989528900075147-0.005157234594068788-0.06730528885088097
gpt2-large	average	uniform	fool	14.9185	42		21
gpt2	ensemble	uniform	fool	21.2976	88		21
gpt2	average	uniform	fool	21.3409	88		21
gpt2	ensemble	TF-IDF	fool	21.2146	88		21	0.050630180062243894-0.06056429564433337-0.034493059215260406-0.05553001167273003-0.042211388129651285-0.046765955593570524-0.06078131215934496-0.03908709088333501-0.04948079038493975-0.048506914492755654-0.04936502676384297-0.054940774702581206-0.0582728730490638-0.055740575932404834-0.05352534451432727-0.062248587446323896-0.029677970617660063-0.029067309516716888-0.03572804229564947-0.03133727…
gpt2	average	TF-IDF	fool	21.2881	88		21	0.050630180062243894-0.06056429564433337-0.034493059215260406-0.05553001167273003-0.042211388129651285-0.046765955593570524-0.06078131215934496-0.03908709088333501-0.04948079038493975-0.048506914492755654-0.04936502676384297-0.054940774702581206-0.0582728730490638-0.055740575932404834-0.05352534451432727-0.062248587446323896-0.029677970617660063-0.029067309516716888-0.03572804229564947-0.03133727…
gpt2	ensemble	Sentence Sim	fool	21.1732	88		21	0.03681443118275982-0.0728236639801671-0.04830197155131363-0.06738899581023228-0.022890068767758502-0.007777480173281723-0.0943985767813342-0.010298349651271707-0.05665612467384388-0.027589149342515006-0.05594725772872991-0.051167398860870336-0.09517403313190002-0.0956328738465008-0.08934543128426917-0.05711819975491433-0.006590466011048898-0.02092183301942069-0.007073104725335501-0.0058486883467…
gpt2	average	Sentence Sim	fool	21.2212	88		21	0.03681443118275982-0.0728236639801671-0.04830197155131363-0.06738899581023228-0.022890068767758502-0.007777480173281723-0.0943985767813342-0.010298349651271707-0.05665612467384388-0.027589149342515006-0.05594725772872991-0.051167398860870336-0.09517403313190002-0.0956328738465008-0.08934543128426917-0.05711819975491433-0.006590466011048898-0.02092183301942069-0.007073104725335501-0.0058486883467…
gpt2-large	ensemble	uniform	fool	14.4388	42		21
gpt2-large	average	Prior	fool	14.9103	10		21	0.043182373046875-0.04010009765625-0.04742431640625-0.039276123046875-0.044036865234375-0.05426025390625-0.03704833984375-0.048309326171875-0.0546875-0.040802001953125-0.044036865234375-0.0517578125-0.0516357421875-0.052642822265625-0.03802490234375-0.0390625-0.042083740234375-0.08282470703125-0.051605224609375-0.053192138671875-0.0439453125
gpt2	ensemble	Prior	fool	21.3809	88		21	0.041534423828125-0.03961181640625-0.046783447265625-0.039154052734375-0.05059814453125-0.0499267578125-0.039794921875-0.0479736328125-0.059234619140625-0.041015625-0.04791259765625-0.052154541015625-0.04583740234375-0.0543212890625-0.038970947265625-0.0404052734375-0.046295166015625-0.0775146484375-0.047027587890625-0.049713134765625-0.044189453125
gpt2	average	Prior	fool	21.3844	88		21	0.041534423828125-0.03961181640625-0.046783447265625-0.039154052734375-0.05059814453125-0.0499267578125-0.039794921875-0.0479736328125-0.059234619140625-0.041015625-0.04791259765625-0.052154541015625-0.04583740234375-0.0543212890625-0.038970947265625-0.0404052734375-0.046295166015625-0.0775146484375-0.047027587890625-0.049713134765625-0.044189453125
gpt2	ensemble	Entropy	fool	21.2976	88		21	0.047675023105360446-0.04765480591497227-0.04764325323475046-0.04770246072088725-0.047565272643253234-0.04762014787430684-0.04766780268022181-0.04758693391866913-0.047556608133086875-0.04765480591497227-0.04757826940850277-0.04761581561922366-0.047669246765249536-0.04757104898336414-0.047679355360443626-0.04765191774491682-0.04753927911275416-0.04750895332717191-0.04762736829944547-0.047586933918…
gpt2-large	average	Prior	fool	14.9103	5		21	0.043182373046875-0.04010009765625-0.04742431640625-0.039276123046875-0.044036865234375-0.05426025390625-0.03704833984375-0.048309326171875-0.0546875-0.040802001953125-0.044036865234375-0.0517578125-0.0516357421875-0.052642822265625-0.03802490234375-0.0390625-0.042083740234375-0.08282470703125-0.051605224609375-0.053192138671875-0.0439453125
gpt2-large	average	TF-IDF	fool	14.9117	42		21	0.05078380218784323-0.060686197996230144-0.03945261428551191-0.05632224698411288-0.04233648340532969-0.04625697974696495-0.06421918339028615-0.038969130442269205-0.047059001254637786-0.04839112759083017-0.049775895138931006-0.051429830829923834-0.05549213988214-0.05330578163986111-0.058264577623176106-0.05659152910814584-0.029572068455786565-0.03184683680355703-0.036836969031429-0.030012618068299…
gpt2-large	ensemble	TF-IDF	fool	14.3825	42		21	0.05078380218784323-0.060686197996230144-0.03945261428551191-0.05632224698411288-0.04233648340532969-0.04625697974696495-0.06421918339028615-0.038969130442269205-0.047059001254637786-0.04839112759083017-0.049775895138931006-0.051429830829923834-0.05549213988214-0.05330578163986111-0.058264577623176106-0.05659152910814584-0.029572068455786565-0.03184683680355703-0.036836969031429-0.030012618068299…
gpt2	average	Entropy	fool	21.3406	88		21	0.047675023105360446-0.04765480591497227-0.04764325323475046-0.04770246072088725-0.047565272643253234-0.04762014787430684-0.04766780268022181-0.04758693391866913-0.047556608133086875-0.04765480591497227-0.04757826940850277-0.04761581561922366-0.047669246765249536-0.04757104898336414-0.047679355360443626-0.04765191774491682-0.04753927911275416-0.04750895332717191-0.04762736829944547-0.047586933918…
gpt2-large	ensemble	Prior	fool	14.4954	5		21	0.043182373046875-0.04010009765625-0.04742431640625-0.039276123046875-0.044036865234375-0.05426025390625-0.03704833984375-0.048309326171875-0.0546875-0.040802001953125-0.044036865234375-0.0517578125-0.0516357421875-0.052642822265625-0.03802490234375-0.0390625-0.042083740234375-0.08282470703125-0.051605224609375-0.053192138671875-0.0439453125
gpt2-large	ensemble	Prior	fool	14.4954	10		21	0.043182373046875-0.04010009765625-0.04742431640625-0.039276123046875-0.044036865234375-0.05426025390625-0.03704833984375-0.048309326171875-0.0546875-0.040802001953125-0.044036865234375-0.0517578125-0.0516357421875-0.052642822265625-0.03802490234375-0.0390625-0.042083740234375-0.08282470703125-0.051605224609375-0.053192138671875-0.0439453125
gpt2-large	average	Sentence Sim	fool	14.8692	42		21	0.03874710389683265-0.08004504973838515-0.05052176035043541-0.06754136050560797-0.0258178285108104-0.0027681283184338625-0.09748409355202282-0.011564597217044772-0.05690563004460318-0.021067965654708188-0.05144173233615585-0.04930235960470643-0.09524546870528953-0.0961005937933903-0.0954058927544324-0.052551874050550354-0.00258069201097381-0.017879401217047328-0.011921005071293922-0.0108849929972…
gpt2-large	ensemble	Sentence Sim	fool	14.3545	42		21	0.03874710389683265-0.08004504973838515-0.05052176035043541-0.06754136050560797-0.0258178285108104-0.0027681283184338625-0.09748409355202282-0.011564597217044772-0.05690563004460318-0.021067965654708188-0.05144173233615585-0.04930235960470643-0.09524546870528953-0.0961005937933903-0.0954058927544324-0.052551874050550354-0.00258069201097381-0.017879401217047328-0.011921005071293922-0.0108849929972…
gpt2-large	average	Entropy	fool	14.9184	5		21	0.047662612374405076-0.047648510488277805-0.04765908690287326-0.04768552793936189-0.04760796756566191-0.04760444209413009-0.04767318878900053-0.04757095011457783-0.04759915388683236-0.04767495152476644-0.04761854398025736-0.04761678124449145-0.04762383218755509-0.04760444209413009-0.047682002467830074-0.047650273224043714-0.04760444209413009-0.04745637228979376-0.0475656619072801-0.04756213643574…
gpt2-large	average	Prior	fool	14.9103	42		21	0.043182373046875-0.04010009765625-0.04742431640625-0.039276123046875-0.044036865234375-0.05426025390625-0.03704833984375-0.048309326171875-0.0546875-0.040802001953125-0.044036865234375-0.0517578125-0.0516357421875-0.052642822265625-0.03802490234375-0.0390625-0.042083740234375-0.08282470703125-0.051605224609375-0.053192138671875-0.0439453125
gpt2	ensemble	TF-IDF	fool	21.1318	5	78_www.wired.com-91_www.entrepreneur.com-77_www.androidheadlines.com-85_www.pcworld.com-60_www.csmonitor.com	5	0.0-0.1979202482921216-0.0-0.0-0.0-0.0-0.21480849190753493-0.0-0.0-0.0-0.0-0.0-0.19169190985328846-0.0-0.20075578467910005-0.1948235652679549-0.0-0.0-0.0-0.0-0.0
gpt2	average	TF-IDF	fool	21.1125	5	78_www.wired.com-91_www.entrepreneur.com-77_www.androidheadlines.com-85_www.pcworld.com-60_www.csmonitor.com	5	0.0-0.1979202482921216-0.0-0.0-0.0-0.0-0.21480849190753493-0.0-0.0-0.0-0.0-0.0-0.19169190985328846-0.0-0.20075578467910005-0.1948235652679549-0.0-0.0-0.0-0.0-0.0
gpt2	ensemble	Sentence Sim	fool	21.1318	5	78_www.wired.com-91_www.entrepreneur.com-77_www.androidheadlines.com-84_www.glassdoor.com-85_www.pcworld.com	5	0.0-0.1631988661413325-0.0-0.0-0.0-0.0-0.22730175040971953-0.0-0.0-0.0-0.0-0.0-0.19476505284065468-0.2111388091702195-0.20359552143807383-0.0-0.0-0.0-0.0-0.0-0.0
gpt2	average	Sentence Sim	fool	21.164	5	78_www.wired.com-91_www.entrepreneur.com-77_www.androidheadlines.com-84_www.glassdoor.com-85_www.pcworld.com	5	0.0-0.1631988661413325-0.0-0.0-0.0-0.0-0.22730175040971953-0.0-0.0-0.0-0.0-0.0-0.19476505284065468-0.2111388091702195-0.20359552143807383-0.0-0.0-0.0-0.0-0.0-0.0
gpt2	ensemble	TF-IDF	fool	21.0906	10	78_www.wired.com-45_www.npr.org-91_www.entrepreneur.com-77_www.androidheadlines.com-60_www.csmonitor.com	5	0.0-0.20322359335058768-0.0-0.19389273852549446-0.0-0.0-0.20266094260319006-0.0-0.0-0.0-0.0-0.0-0.19434610777621328-0.0-0.0-0.20587661774451466-0.0-0.0-0.0-0.0-0.0
gpt2	average	TF-IDF	fool	21.1192	10	78_www.wired.com-45_www.npr.org-91_www.entrepreneur.com-77_www.androidheadlines.com-60_www.csmonitor.com	5	0.0-0.20322359335058768-0.0-0.19389273852549446-0.0-0.0-0.20266094260319006-0.0-0.0-0.0-0.0-0.0-0.19434610777621328-0.0-0.0-0.20587661774451466-0.0-0.0-0.0-0.0-0.0
gpt2-large	ensemble	Entropy	fool	14.9184	10		21	0.047662612374405076-0.047648510488277805-0.04765908690287326-0.04768552793936189-0.04760796756566191-0.04760444209413009-0.04767318878900053-0.04757095011457783-0.04759915388683236-0.04767495152476644-0.04761854398025736-0.04761678124449145-0.04762383218755509-0.04760444209413009-0.047682002467830074-0.047650273224043714-0.04760444209413009-0.04745637228979376-0.0475656619072801-0.04756213643574…
gpt2	ensemble	Prior	fool	22.3197	5	["81_www.librarything.com", "70_www.insiderpages.com", "22_forums.macrumors.com", "84_www.glassdoor.com", "39_www.booking.com"]	5
gpt2	average	Prior	fool	21.9712	5	["81_www.librarything.com", "70_www.insiderpages.com", "22_forums.macrumors.com", "84_www.glassdoor.com", "39_www.booking.com"]	5
gpt2	ensemble	Prior	fool	22.2327	10	70_www.insiderpages.com-22_forums.macrumors.com-39_www.booking.com-journals.plos.org-www.frontiersin.org	5	0.0-0.0-0.0-0.0-0.0-0.0-0.0-0.0-0.19453299037496105-0.0-0.0-0.2034372003553232-0.0-0.0-0.0-0.0-0.0-0.18910620568595718-0.21463397974335965-0.19828962384039894-0.0
gpt2	average	Prior	fool	21.9712	10	70_www.insiderpages.com-22_forums.macrumors.com-39_www.booking.com-journals.plos.org-www.frontiersin.org	5	0.0-0.0-0.0-0.0-0.0-0.0-0.0-0.0-0.19453299037496105-0.0-0.0-0.2034372003553232-0.0-0.0-0.0-0.0-0.0-0.18910620568595718-0.21463397974335965-0.19828962384039894-0.0
gpt2	ensemble	Prior	fool	22.2327	42	70_www.insiderpages.com-22_forums.macrumors.com-39_www.booking.com-journals.plos.org-www.frontiersin.org	5	0.0-0.0-0.0-0.0-0.0-0.0-0.0-0.0-0.19453299037496105-0.0-0.0-0.2034372003553232-0.0-0.0-0.0-0.0-0.0-0.18910620568595718-0.21463397974335965-0.19828962384039894-0.0
gpt2	average	Prior	fool	21.8348	42	70_www.insiderpages.com-22_forums.macrumors.com-39_www.booking.com-journals.plos.org-www.frontiersin.org	5	0.0-0.0-0.0-0.0-0.0-0.0-0.0-0.0-0.19453299037496105-0.0-0.0-0.2034372003553232-0.0-0.0-0.0-0.0-0.0-0.18910620568595718-0.21463397974335965-0.19828962384039894-0.0
gpt2	ensemble	Prior	fool	21.6887	88	11_link.springer.com-22_forums.macrumors.com-60_www.csmonitor.com-journals.plos.org-www.frontiersin.org	5	0.0-0.0-0.0-0.0-0.0-0.0-0.0-0.18043715945942054-0.0-0.0-0.0-0.18631789849430172-0.0-0.0-0.0-0.1783230446406781-0.0-0.0-0.2440472534950039-0.2108746439105958-0.0
gpt2	average	Prior	fool	21.888	88	11_link.springer.com-22_forums.macrumors.com-60_www.csmonitor.com-journals.plos.org-www.frontiersin.org	5	0.0-0.0-0.0-0.0-0.0-0.0-0.0-0.18043715945942054-0.0-0.0-0.0-0.18631789849430172-0.0-0.0-0.0-0.1783230446406781-0.0-0.0-0.2440472534950039-0.2108746439105958-0.0
gpt2	ensemble	TF-IDF	fool	21.1318	42	78_www.wired.com-45_www.npr.org-91_www.entrepreneur.com-85_www.pcworld.com-60_www.csmonitor.com	5	0.0-0.2049629574395025-0.0-0.19022404916879113-0.0-0.0-0.21689534336688038-0.0-0.0-0.0-0.0-0.0-0.0-0.0-0.19678412123217015-0.19113352879265577-0.0-0.0-0.0-0.0-0.0
gpt2	average	TF-IDF	fool	21.1516	42	78_www.wired.com-45_www.npr.org-91_www.entrepreneur.com-85_www.pcworld.com-60_www.csmonitor.com	5	0.0-0.2049629574395025-0.0-0.19022404916879113-0.0-0.0-0.21689534336688038-0.0-0.0-0.0-0.0-0.0-0.0-0.0-0.19678412123217015-0.19113352879265577-0.0-0.0-0.0-0.0-0.0
gpt2	ensemble	TF-IDF	fool	21.1318	88	78_www.wired.com-91_www.entrepreneur.com-77_www.androidheadlines.com-84_www.glassdoor.com-60_www.csmonitor.com	5	0.0-0.20350383069202405-0.0-0.0-0.0-0.0-0.20423303412217114-0.0-0.0-0.0-0.0-0.0-0.19580435576359323-0.18729551143199594-0.0-0.20916326799021565-0.0-0.0-0.0-0.0-0.0
gpt2	average	TF-IDF	fool	21.1519	88	78_www.wired.com-91_www.entrepreneur.com-77_www.androidheadlines.com-84_www.glassdoor.com-60_www.csmonitor.com	5	0.0-0.20350383069202405-0.0-0.0-0.0-0.0-0.20423303412217114-0.0-0.0-0.0-0.0-0.0-0.19580435576359323-0.18729551143199594-0.0-0.20916326799021565-0.0-0.0-0.0-0.0-0.0
gpt2-large	ensemble	Prior	fool	14.4954	42		21	0.043182373046875-0.04010009765625-0.04742431640625-0.039276123046875-0.044036865234375-0.05426025390625-0.03704833984375-0.048309326171875-0.0546875-0.040802001953125-0.044036865234375-0.0517578125-0.0516357421875-0.052642822265625-0.03802490234375-0.0390625-0.042083740234375-0.08282470703125-0.051605224609375-0.053192138671875-0.0439453125
gpt2-large	average	Entropy	fool	14.9184	42		21	0.047662612374405076-0.047648510488277805-0.04765908690287326-0.04768552793936189-0.04760796756566191-0.04760444209413009-0.04767318878900053-0.04757095011457783-0.04759915388683236-0.04767495152476644-0.04761854398025736-0.04761678124449145-0.04762383218755509-0.04760444209413009-0.047682002467830074-0.047650273224043714-0.04760444209413009-0.04745637228979376-0.0475656619072801-0.04756213643574…
gpt2-large	ensemble	Entropy	fool	14.4388	42		21	0.047662612374405076-0.047648510488277805-0.04765908690287326-0.04768552793936189-0.04760796756566191-0.04760444209413009-0.04767318878900053-0.04757095011457783-0.04759915388683236-0.04767495152476644-0.04761854398025736-0.04761678124449145-0.04762383218755509-0.04760444209413009-0.047682002467830074-0.047650273224043714-0.04760444209413009-0.04745637228979376-0.0475656619072801-0.04756213643574…
gpt2			fool	22.7625	10
gpt2			fool	22.7625	42
gpt2			fool	22.7625	88
gpt2-large			fool	15.2637	10
gpt2-large			fool	15.2637	42
gpt2-large			fool	15.2637	88
gpt2-large	average	uniform	fool	14.9185	88		21
gpt2-large	ensemble	uniform	fool	14.4388	88		21
gpt2	ensemble	Entropy	fool	21.0906	5	["15_www.dailymail.co.uk", "45_www.npr.org", "91_www.entrepreneur.com", "77_www.androidheadlines.com", "85_www.pcworld.com"]	5
gpt2	average	Entropy	fool	21.1418	5	["15_www.dailymail.co.uk", "45_www.npr.org", "91_www.entrepreneur.com", "77_www.androidheadlines.com", "85_www.pcworld.com"]	5
deberta			fool	87477.2	10
deberta			fool	173865	42
deberta			fool	72241.4	88
deberta	average	Sentence Sim	fool	6.41583	5	91_www.entrepreneur.com-84_www.glassdoor.com	2	0.0-0.0-0.0-0.0-0.0-0.0-0.499637793782865-0.0-0.0-0.0-0.0-0.0-0.0-0.5003622062171349-0.0-0.0-0.0-0.0-0.0-0.0-0.0
deberta	average	TF-IDF	fool	5.42036	5	78_www.wired.com-91_www.entrepreneur.com-77_www.androidheadlines.com-85_www.pcworld.com-60_www.csmonitor.com	5	0.0-0.21041690510755767-0.0-0.0-0.0-0.0-0.21318148494790182-0.0-0.0-0.0-0.0-0.0-0.1978850368048726-0.0-0.1872601742654249-0.19125639887424295-0.0-0.0-0.0-0.0-0.0
deberta	average	Sentence Sim	fool	6.46721	10	91_www.entrepreneur.com-84_www.glassdoor.com	2	0.0-0.0-0.0-0.0-0.0-0.0-0.49000573332495323-0.0-0.0-0.0-0.0-0.0-0.0-0.5099942666750467-0.0-0.0-0.0-0.0-0.0-0.0-0.0
deberta	average	Sentence Sim	fool	5.19315	42	91_www.entrepreneur.com-77_www.androidheadlines.com	2	0.0-0.0-0.0-0.0-0.0-0.0-0.5467764561578935-0.0-0.0-0.0-0.0-0.0-0.45322354384210645-0.0-0.0-0.0-0.0-0.0-0.0-0.0-0.0
deberta	average	Sentence Sim	fool	4.82197	88	91_www.entrepreneur.com-85_www.pcworld.com	2	0.0-0.0-0.0-0.0-0.0-0.0-0.5303290453844052-0.0-0.0-0.0-0.0-0.0-0.0-0.0-0.46967095461559494-0.0-0.0-0.0-0.0-0.0-0.0
deberta	average	TF-IDF	fool	4.27993	5	91_www.entrepreneur.com	1	0.0-0.0-0.0-0.0-0.0-0.0-1.0-0.0-0.0-0.0-0.0-0.0-0.0-0.0-0.0-0.0-0.0-0.0-0.0-0.0-0.0
gpt2-large	average	Entropy	fool	14.9184	10		21	0.047662612374405076-0.047648510488277805-0.04765908690287326-0.04768552793936189-0.04760796756566191-0.04760444209413009-0.04767318878900053-0.04757095011457783-0.04759915388683236-0.04767495152476644-0.04761854398025736-0.04761678124449145-0.04762383218755509-0.04760444209413009-0.047682002467830074-0.047650273224043714-0.04760444209413009-0.04745637228979376-0.0475656619072801-0.04756213643574…
gpt2-large	average	TF-IDF	fool	14.9214	88		21	0.050630180062243894-0.06056429564433337-0.034493059215260406-0.05553001167273003-0.042211388129651285-0.046765955593570524-0.06078131215934496-0.03908709088333501-0.04948079038493975-0.048506914492755654-0.04936502676384297-0.054940774702581206-0.0582728730490638-0.055740575932404834-0.05352534451432727-0.062248587446323896-0.029677970617660063-0.029067309516716888-0.03572804229564947-0.03133727…
gpt2-large	ensemble	TF-IDF	fool	14.3825	88		21	0.050630180062243894-0.06056429564433337-0.034493059215260406-0.05553001167273003-0.042211388129651285-0.046765955593570524-0.06078131215934496-0.03908709088333501-0.04948079038493975-0.048506914492755654-0.04936502676384297-0.054940774702581206-0.0582728730490638-0.055740575932404834-0.05352534451432727-0.062248587446323896-0.029677970617660063-0.029067309516716888-0.03572804229564947-0.03133727…
gpt2-large	ensemble	Prior	fool	15.2207	5	37_www.instructables.com-70_www.insiderpages.com-84_www.glassdoor.com-39_www.booking.com-www.frontiersin.org	5	0.0-0.0-0.0-0.0-0.0-0.18232157506152585-0.0-0.0-0.1837571780147662-0.0-0.0-0.0-0.0-0.17688679245283018-0.0-0.0-0.0-0.2783018867924528-0.0-0.17873256767842494-0.0
gpt2-large	average	Prior	fool	15.2056	5	37_www.instructables.com-70_www.insiderpages.com-84_www.glassdoor.com-39_www.booking.com-www.frontiersin.org	5	0.0-0.0-0.0-0.0-0.0-0.18232157506152585-0.0-0.0-0.1837571780147662-0.0-0.0-0.0-0.0-0.17688679245283018-0.0-0.0-0.0-0.2783018867924528-0.0-0.17873256767842494-0.0
gpt2-large	average	Sentence Sim	fool	14.8687	88		21	0.03681443118275982-0.0728236639801671-0.04830197155131363-0.06738899581023228-0.022890068767758502-0.007777480173281723-0.0943985767813342-0.010298349651271707-0.05665612467384388-0.027589149342515006-0.05594725772872991-0.051167398860870336-0.09517403313190002-0.0956328738465008-0.08934543128426917-0.05711819975491433-0.006590466011048898-0.02092183301942069-0.007073104725335501-0.0058486883467…
gpt2-large	ensemble	Sentence Sim	fool	14.3545	88		21	0.03681443118275982-0.0728236639801671-0.04830197155131363-0.06738899581023228-0.022890068767758502-0.007777480173281723-0.0943985767813342-0.010298349651271707-0.05665612467384388-0.027589149342515006-0.05594725772872991-0.051167398860870336-0.09517403313190002-0.0956328738465008-0.08934543128426917-0.05711819975491433-0.006590466011048898-0.02092183301942069-0.007073104725335501-0.0058486883467…
deberta	ensemble	uniform	fool	4.4338	5		21
gpt2-large	ensemble	Entropy	fool	14.4388	5		21	0.047662612374405076-0.047648510488277805-0.04765908690287326-0.04768552793936189-0.04760796756566191-0.04760444209413009-0.04767318878900053-0.04757095011457783-0.04759915388683236-0.04767495152476644-0.04761854398025736-0.04761678124449145-0.04762383218755509-0.04760444209413009-0.047682002467830074-0.047650273224043714-0.04760444209413009-0.04745637228979376-0.0475656619072801-0.04756213643574…
gpt2-large	average	Prior	fool	14.9103	88		21	0.043182373046875-0.04010009765625-0.04742431640625-0.039276123046875-0.044036865234375-0.05426025390625-0.03704833984375-0.048309326171875-0.0546875-0.040802001953125-0.044036865234375-0.0517578125-0.0516357421875-0.052642822265625-0.03802490234375-0.0390625-0.042083740234375-0.08282470703125-0.051605224609375-0.053192138671875-0.0439453125
gpt2-large	ensemble	Prior	fool	14.4954	88		21	0.043182373046875-0.04010009765625-0.04742431640625-0.039276123046875-0.044036865234375-0.05426025390625-0.03704833984375-0.048309326171875-0.0546875-0.040802001953125-0.044036865234375-0.0517578125-0.0516357421875-0.052642822265625-0.03802490234375-0.0390625-0.042083740234375-0.08282470703125-0.051605224609375-0.053192138671875-0.0439453125
deberta	average	TF-IDF	fool	4.77067	5	78_www.wired.com-91_www.entrepreneur.com	2	0.0-0.4967367913745114-0.0-0.0-0.0-0.0-0.5032632086254887-0.0-0.0-0.0-0.0-0.0-0.0-0.0-0.0-0.0-0.0-0.0-0.0-0.0-0.0
deberta	average	TF-IDF	fool	5.27689	5	78_www.wired.com-91_www.entrepreneur.com-77_www.androidheadlines.com	3	0.0-0.33857202945951653-0.0-0.0-0.0-0.0-0.3430203859576303-0.0-0.0-0.0-0.0-0.0-0.3184075845828531-0.0-0.0-0.0-0.0-0.0-0.0-0.0-0.0
gpt2	ensemble	TF-IDF	fool	21.3809	5	91_www.entrepreneur.com	1	0.0-0.0-0.0-0.0-0.0-0.0-1.0-0.0-0.0-0.0-0.0-0.0-0.0-0.0-0.0-0.0-0.0-0.0-0.0-0.0-0.0
gpt2	average	TF-IDF	fool	21.38	5	91_www.entrepreneur.com	1	0.0-0.0-0.0-0.0-0.0-0.0-1.0-0.0-0.0-0.0-0.0-0.0-0.0-0.0-0.0-0.0-0.0-0.0-0.0-0.0-0.0
gpt2	ensemble	Sentence Sim	fool	21.3809	5	91_www.entrepreneur.com	1	0.0-0.0-0.0-0.0-0.0-0.0-1.0-0.0-0.0-0.0-0.0-0.0-0.0-0.0-0.0-0.0-0.0-0.0-0.0-0.0-0.0
gpt2	average	Sentence Sim	fool	21.38	5	91_www.entrepreneur.com	1	0.0-0.0-0.0-0.0-0.0-0.0-1.0-0.0-0.0-0.0-0.0-0.0-0.0-0.0-0.0-0.0-0.0-0.0-0.0-0.0-0.0
gpt2	ensemble	Prior	fool	27.615	5	39_www.booking.com	1	0.0-0.0-0.0-0.0-0.0-0.0-0.0-0.0-0.0-0.0-0.0-0.0-0.0-0.0-0.0-0.0-0.0-1.0-0.0-0.0-0.0
gpt2	average	Prior	fool	27.601	5	39_www.booking.com	1	0.0-0.0-0.0-0.0-0.0-0.0-0.0-0.0-0.0-0.0-0.0-0.0-0.0-0.0-0.0-0.0-0.0-1.0-0.0-0.0-0.0
gpt2-large	average	Entropy	fool	14.9185	88		21	0.047662612374405076-0.047648510488277805-0.04765908690287326-0.04768552793936189-0.04760796756566191-0.04760444209413009-0.04767318878900053-0.04757095011457783-0.04759915388683236-0.04767495152476644-0.04761854398025736-0.04761678124449145-0.04762383218755509-0.04760444209413009-0.047682002467830074-0.047650273224043714-0.04760444209413009-0.04745637228979376-0.0475656619072801-0.04756213643574…
gpt2-large	ensemble	Entropy	fool	14.4388	88		21	0.047662612374405076-0.047648510488277805-0.04765908690287326-0.04768552793936189-0.04760796756566191-0.04760444209413009-0.04767318878900053-0.04757095011457783-0.04759915388683236-0.04767495152476644-0.04761854398025736-0.04761678124449145-0.04762383218755509-0.04760444209413009-0.047682002467830074-0.047650273224043714-0.04760444209413009-0.04745637228979376-0.0475656619072801-0.04756213643574…
gpt2	ensemble	Entropy	fool	21.8026	5	45_www.npr.org	1	0.0-0.0-0.0-1.0-0.0-0.0-0.0-0.0-0.0-0.0-0.0-0.0-0.0-0.0-0.0-0.0-0.0-0.0-0.0-0.0-0.0
gpt2	average	Entropy	fool	21.7798	5	45_www.npr.org	1	0.0-0.0-0.0-1.0-0.0-0.0-0.0-0.0-0.0-0.0-0.0-0.0-0.0-0.0-0.0-0.0-0.0-0.0-0.0-0.0-0.0
gpt2-large	average	TF-IDF	fool	14.528	42	78_www.wired.com-45_www.npr.org-91_www.entrepreneur.com-85_www.pcworld.com-60_www.csmonitor.com	5	0.0-0.2049629574395025-0.0-0.19022404916879113-0.0-0.0-0.21689534336688038-0.0-0.0-0.0-0.0-0.0-0.0-0.0-0.19678412123217015-0.19113352879265577-0.0-0.0-0.0-0.0-0.0
gpt2-large	ensemble	TF-IDF	fool	14.4388	42	78_www.wired.com-45_www.npr.org-91_www.entrepreneur.com-85_www.pcworld.com-60_www.csmonitor.com	5	0.0-0.2049629574395025-0.0-0.19022404916879113-0.0-0.0-0.21689534336688038-0.0-0.0-0.0-0.0-0.0-0.0-0.0-0.19678412123217015-0.19113352879265577-0.0-0.0-0.0-0.0-0.0
gpt2	ensemble	Entropy	fool	21.256	5	45_www.npr.org-85_www.pcworld.com	2	0.0-0.0-0.0-0.5025015634771732-0.0-0.0-0.0-0.0-0.0-0.0-0.0-0.0-0.0-0.0-0.49749843652282677-0.0-0.0-0.0-0.0-0.0-0.0
gpt2	average	Entropy	fool	21.2355	5	45_www.npr.org-85_www.pcworld.com	2	0.0-0.0-0.0-0.5025015634771732-0.0-0.0-0.0-0.0-0.0-0.0-0.0-0.0-0.0-0.0-0.49749843652282677-0.0-0.0-0.0-0.0-0.0-0.0
gpt2-large	average	Sentence Sim	fool	14.8771	42	78_www.wired.com-91_www.entrepreneur.com-77_www.androidheadlines.com-84_www.glassdoor.com-85_www.pcworld.com	5	0.0-0.1724064365090279-0.0-0.0-0.0-0.0-0.20996782737405575-0.0-0.0-0.0-0.0-0.0-0.20514612592259457-0.2069879521153544-0.20549165807896735-0.0-0.0-0.0-0.0-0.0-0.0
gpt2-large	ensemble	Sentence Sim	fool	14.4388	42	78_www.wired.com-91_www.entrepreneur.com-77_www.androidheadlines.com-84_www.glassdoor.com-85_www.pcworld.com	5	0.0-0.1724064365090279-0.0-0.0-0.0-0.0-0.20996782737405575-0.0-0.0-0.0-0.0-0.0-0.20514612592259457-0.2069879521153544-0.20549165807896735-0.0-0.0-0.0-0.0-0.0-0.0
gpt2	ensemble	TF-IDF	fool	21.2146	5	91_www.entrepreneur.com-85_www.pcworld.com	2	0.0-0.0-0.0-0.0-0.0-0.0-0.5169079827359814-0.0-0.0-0.0-0.0-0.0-0.0-0.0-0.4830920172640185-0.0-0.0-0.0-0.0-0.0-0.0
gpt2	average	TF-IDF	fool	21.1802	5	91_www.entrepreneur.com-85_www.pcworld.com	2	0.0-0.0-0.0-0.0-0.0-0.0-0.5169079827359814-0.0-0.0-0.0-0.0-0.0-0.0-0.0-0.4830920172640185-0.0-0.0-0.0-0.0-0.0-0.0
gpt2	ensemble	Sentence Sim	fool	21.4227	5	91_www.entrepreneur.com-84_www.glassdoor.com	2	0.0-0.0-0.0-0.0-0.0-0.0-0.5184323061431468-0.0-0.0-0.0-0.0-0.0-0.0-0.4815676938568533-0.0-0.0-0.0-0.0-0.0-0.0-0.0
gpt2	average	Sentence Sim	fool	21.4721	5	91_www.entrepreneur.com-84_www.glassdoor.com	2	0.0-0.0-0.0-0.0-0.0-0.0-0.5184323061431468-0.0-0.0-0.0-0.0-0.0-0.0-0.4815676938568533-0.0-0.0-0.0-0.0-0.0-0.0-0.0
gpt2	ensemble	Prior	fool	24.1805	5	70_www.insiderpages.com-39_www.booking.com	2	0.0-0.0-0.0-0.0-0.0-0.0-0.0-0.0-0.43316224057130104-0.0-0.0-0.0-0.0-0.0-0.0-0.0-0.0-0.566837759428699-0.0-0.0-0.0
gpt2	average	Prior	fool	23.3274	5	70_www.insiderpages.com-39_www.booking.com	2	0.0-0.0-0.0-0.0-0.0-0.0-0.0-0.0-0.43316224057130104-0.0-0.0-0.0-0.0-0.0-0.0-0.0-0.0-0.566837759428699-0.0-0.0-0.0
gpt2-large	average	Prior	fool	15.2056	42	37_www.instructables.com-70_www.insiderpages.com-84_www.glassdoor.com-39_www.booking.com-www.frontiersin.org	5	0.0-0.0-0.0-0.0-0.0-0.18232157506152585-0.0-0.0-0.1837571780147662-0.0-0.0-0.0-0.0-0.17688679245283018-0.0-0.0-0.0-0.2783018867924528-0.0-0.17873256767842494-0.0
gpt2-large	ensemble	Prior	fool	15.2207	42	37_www.instructables.com-70_www.insiderpages.com-84_www.glassdoor.com-39_www.booking.com-www.frontiersin.org	5	0.0-0.0-0.0-0.0-0.0-0.18232157506152585-0.0-0.0-0.1837571780147662-0.0-0.0-0.0-0.0-0.17688679245283018-0.0-0.0-0.0-0.2783018867924528-0.0-0.17873256767842494-0.0
gpt2	ensemble	TF-IDF	fool	21.1732	5	78_www.wired.com-91_www.entrepreneur.com-85_www.pcworld.com	3	0.0-0.3226165294572617-0.0-0.0-0.0-0.0-0.3501449232969449-0.0-0.0-0.0-0.0-0.0-0.0-0.0-0.3272385472457933-0.0-0.0-0.0-0.0-0.0-0.0
gpt2	average	TF-IDF	fool	21.1621	5	78_www.wired.com-91_www.entrepreneur.com-85_www.pcworld.com	3	0.0-0.3226165294572617-0.0-0.0-0.0-0.0-0.3501449232969449-0.0-0.0-0.0-0.0-0.0-0.0-0.0-0.3272385472457933-0.0-0.0-0.0-0.0-0.0-0.0
gpt2	ensemble	Sentence Sim	fool	21.2146	5	91_www.entrepreneur.com-84_www.glassdoor.com-85_www.pcworld.com	3	0.0-0.0-0.0-0.0-0.0-0.0-0.35403267375458053-0.0-0.0-0.0-0.0-0.0-0.0-0.32885816765225667-0.3171091585931629-0.0-0.0-0.0-0.0-0.0-0.0
gpt2	average	Sentence Sim	fool	21.2146	5	91_www.entrepreneur.com-84_www.glassdoor.com-85_www.pcworld.com	3	0.0-0.0-0.0-0.0-0.0-0.0-0.35403267375458053-0.0-0.0-0.0-0.0-0.0-0.0-0.32885816765225667-0.3171091585931629-0.0-0.0-0.0-0.0-0.0-0.0
gpt2	ensemble	TF-IDF	fool	21.7316	5	78_www.wired.com-91_www.entrepreneur.com-85_www.pcworld.com-60_www.csmonitor.com	4	0.0-0.2448574382772764-0.0-0.0-0.0-0.0-0.2657507632622435-0.0-0.0-0.0-0.0-0.0-0.0-0.0-0.2483654278935424-0.24102637056693765-0.0-0.0-0.0-0.0-0.0
gpt2	average	TF-IDF	fool	21.1565	5	78_www.wired.com-91_www.entrepreneur.com-85_www.pcworld.com-60_www.csmonitor.com	4	0.0-0.2448574382772764-0.0-0.0-0.0-0.0-0.2657507632622435-0.0-0.0-0.0-0.0-0.0-0.0-0.0-0.2483654278935424-0.24102637056693765-0.0-0.0-0.0-0.0-0.0
gpt2	ensemble	Sentence Sim	fool	21.1732	5	91_www.entrepreneur.com-77_www.androidheadlines.com-84_www.glassdoor.com-85_www.pcworld.com	4	0.0-0.0-0.0-0.0-0.0-0.0-0.2716317428509961-0.0-0.0-0.0-0.0-0.0-0.23274950876626055-0.2523165906774214-0.24330215770532204-0.0-0.0-0.0-0.0-0.0-0.0
gpt2	average	Sentence Sim	fool	21.2131	5	91_www.entrepreneur.com-77_www.androidheadlines.com-84_www.glassdoor.com-85_www.pcworld.com	4	0.0-0.0-0.0-0.0-0.0-0.0-0.2716317428509961-0.0-0.0-0.0-0.0-0.0-0.23274950876626055-0.2523165906774214-0.24330215770532204-0.0-0.0-0.0-0.0-0.0-0.0
gpt2	ensemble	Prior	fool	22.5828	5	70_www.insiderpages.com-22_forums.macrumors.com-84_www.glassdoor.com-39_www.booking.com	4	0.0-0.0-0.0-0.0-0.0-0.0-0.0-0.0-0.24353826850690088-0.0-0.0-0.21442910915934754-0.0-0.2233375156838143-0.0-0.0-0.0-0.3186951066499373-0.0-0.0-0.0
gpt2	average	Prior	fool	22.1332	5	70_www.insiderpages.com-22_forums.macrumors.com-84_www.glassdoor.com-39_www.booking.com	4	0.0-0.0-0.0-0.0-0.0-0.0-0.0-0.0-0.24353826850690088-0.0-0.0-0.21442910915934754-0.0-0.2233375156838143-0.0-0.0-0.0-0.3186951066499373-0.0-0.0-0.0
gpt2	ensemble	Entropy	fool	21.1318	5	15_www.dailymail.co.uk-45_www.npr.org-77_www.androidheadlines.com-85_www.pcworld.com	4	0.2497664279040797-0.0-0.0-0.2507526211979653-0.0-0.0-0.0-0.0-0.0-0.0-0.0-0.0-0.2495588082632617-0.0-0.24992214263469323-0.0-0.0-0.0-0.0-0.0-0.0
gpt2	average	Entropy	fool	21.2039	5	15_www.dailymail.co.uk-45_www.npr.org-77_www.androidheadlines.com-85_www.pcworld.com	4	0.2497664279040797-0.0-0.0-0.2507526211979653-0.0-0.0-0.0-0.0-0.0-0.0-0.0-0.0-0.2495588082632617-0.0-0.24992214263469323-0.0-0.0-0.0-0.0-0.0-0.0
gpt2	ensemble	TF-IDF	fool	21.0906	5	78_www.wired.com-45_www.npr.org-91_www.entrepreneur.com-77_www.androidheadlines.com-85_www.pcworld.com-60_www.csmonitor.com	6	0.0-0.1680959981387038-0.0-0.15068822119401604-0.0-0.0-0.1824393823646193-0.0-0.0-0.0-0.0-0.0-0.16280619694021276-0.0-0.17050425259139756-0.16546594877105053-0.0-0.0-0.0-0.0-0.0
gpt2	average	TF-IDF	fool	21.1015	5	78_www.wired.com-45_www.npr.org-91_www.entrepreneur.com-77_www.androidheadlines.com-85_www.pcworld.com-60_www.csmonitor.com	6	0.0-0.1680959981387038-0.0-0.15068822119401604-0.0-0.0-0.1824393823646193-0.0-0.0-0.0-0.0-0.0-0.16280619694021276-0.0-0.17050425259139756-0.16546594877105053-0.0-0.0-0.0-0.0-0.0
gpt2	ensemble	Sentence Sim	fool	21.0495	5	78_www.wired.com-45_www.npr.org-91_www.entrepreneur.com-77_www.androidheadlines.com-84_www.glassdoor.com-85_www.pcworld.com	6	0.0-0.14118847152675074-0.0-0.13486855108123397-0.0-0.0-0.1966458926737324-0.0-0.0-0.0-0.0-0.0-0.16849737236277562-0.18266282390041483-0.1761368884550925-0.0-0.0-0.0-0.0-0.0-0.0
gpt2	average	Sentence Sim	fool	21.117	5	78_www.wired.com-45_www.npr.org-91_www.entrepreneur.com-77_www.androidheadlines.com-84_www.glassdoor.com-85_www.pcworld.com	6	0.0-0.14118847152675074-0.0-0.13486855108123397-0.0-0.0-0.1966458926737324-0.0-0.0-0.0-0.0-0.0-0.16849737236277562-0.18266282390041483-0.1761368884550925-0.0-0.0-0.0-0.0-0.0-0.0
gpt2	ensemble	Prior	fool	22.146	5	81_www.librarything.com-37_www.instructables.com-70_www.insiderpages.com-22_forums.macrumors.com-84_www.glassdoor.com-39_www.booking.com	6	0.0-0.0-0.0-0.0-0.14719460227272727-0.14524147727272727-0.0-0.0-0.17231889204545456-0.0-0.0-0.15172230113636365-0.0-0.15802556818181818-0.0-0.0-0.0-0.2254971590909091-0.0-0.0-0.0
gpt2	average	Prior	fool	21.8663	5	81_www.librarything.com-37_www.instructables.com-70_www.insiderpages.com-22_forums.macrumors.com-84_www.glassdoor.com-39_www.booking.com	6	0.0-0.0-0.0-0.0-0.14719460227272727-0.14524147727272727-0.0-0.0-0.17231889204545456-0.0-0.0-0.15172230113636365-0.0-0.15802556818181818-0.0-0.0-0.0-0.2254971590909091-0.0-0.0-0.0
gpt2	ensemble	Entropy	fool	21.0495	5	15_www.dailymail.co.uk-78_www.wired.com-45_www.npr.org-91_www.entrepreneur.com-100_www.ign.com-77_www.androidheadlines.com-85_www.pcworld.com	6	0.14288879042977404-0.14268202628858367-0.0-0.1431693989071038-0.0-0.0-0.14281494609363463-0.0-0.0-0.14268202628858367-0.0-0.0-0.1428297149608625-0.0-0.14293309703145768-0.0-0.0-0.0-0.0-0.0-0.0
gpt2	average	Entropy	fool	21.1158	5	15_www.dailymail.co.uk-78_www.wired.com-45_www.npr.org-91_www.entrepreneur.com-100_www.ign.com-77_www.androidheadlines.com-85_www.pcworld.com	6	0.14288879042977404-0.14268202628858367-0.0-0.1431693989071038-0.0-0.0-0.14281494609363463-0.0-0.0-0.14268202628858367-0.0-0.0-0.1428297149608625-0.0-0.14293309703145768-0.0-0.0-0.0-0.0-0.0-0.0
gpt2-large	average	TF-IDF	fool	14.5316	10	78_www.wired.com-45_www.npr.org-91_www.entrepreneur.com-77_www.androidheadlines.com-60_www.csmonitor.com	5	0.0-0.20322359335058768-0.0-0.19389273852549446-0.0-0.0-0.20266094260319006-0.0-0.0-0.0-0.0-0.0-0.19434610777621328-0.0-0.0-0.20587661774451466-0.0-0.0-0.0-0.0-0.0
gpt2-large	ensemble	TF-IDF	fool	14.4107	10	78_www.wired.com-45_www.npr.org-91_www.entrepreneur.com-77_www.androidheadlines.com-60_www.csmonitor.com	5	0.0-0.20322359335058768-0.0-0.19389273852549446-0.0-0.0-0.20266094260319006-0.0-0.0-0.0-0.0-0.0-0.19434610777621328-0.0-0.0-0.20587661774451466-0.0-0.0-0.0-0.0-0.0
gpt2-large	average	Sentence Sim	fool	14.895	10	78_www.wired.com-91_www.entrepreneur.com-77_www.androidheadlines.com-84_www.glassdoor.com-85_www.pcworld.com	5	0.0-0.15755718505683547-0.0-0.0-0.0-0.0-0.22046378451127566-0.0-0.0-0.0-0.0-0.0-0.21879589686498505-0.20968967154410478-0.19349346202279907-0.0-0.0-0.0-0.0-0.0-0.0
gpt2-large	ensemble	Sentence Sim	fool	14.4388	10	78_www.wired.com-91_www.entrepreneur.com-77_www.androidheadlines.com-84_www.glassdoor.com-85_www.pcworld.com	5	0.0-0.15755718505683547-0.0-0.0-0.0-0.0-0.22046378451127566-0.0-0.0-0.0-0.0-0.0-0.21879589686498505-0.20968967154410478-0.19349346202279907-0.0-0.0-0.0-0.0-0.0-0.0
gpt2-large	average	Prior	fool	15.2056	10	37_www.instructables.com-70_www.insiderpages.com-84_www.glassdoor.com-39_www.booking.com-www.frontiersin.org	5	0.0-0.0-0.0-0.0-0.0-0.18232157506152585-0.0-0.0-0.1837571780147662-0.0-0.0-0.0-0.0-0.17688679245283018-0.0-0.0-0.0-0.2783018867924528-0.0-0.17873256767842494-0.0
gpt2-large	ensemble	Prior	fool	15.2207	10	37_www.instructables.com-70_www.insiderpages.com-84_www.glassdoor.com-39_www.booking.com-www.frontiersin.org	5	0.0-0.0-0.0-0.0-0.0-0.18232157506152585-0.0-0.0-0.1837571780147662-0.0-0.0-0.0-0.0-0.17688679245283018-0.0-0.0-0.0-0.2783018867924528-0.0-0.17873256767842494-0.0
gpt2	ensemble	TF-IDF	fool	21.0495	5	78_www.wired.com-45_www.npr.org-91_www.entrepreneur.com-77_www.androidheadlines.com-84_www.glassdoor.com-85_www.pcworld.com-60_www.csmonitor.com	7	0.0-0.14639227852792677-0.0-0.1312321072016827-0.0-0.0-0.15888371628898926-0.0-0.0-0.0-0.0-0.0-0.141785470162579-0.12911502862113514-0.14848959113803403-0.14410180805965306-0.0-0.0-0.0-0.0-0.0
gpt2	average	TF-IDF	fool	21.0964	5	78_www.wired.com-45_www.npr.org-91_www.entrepreneur.com-77_www.androidheadlines.com-84_www.glassdoor.com-85_www.pcworld.com-60_www.csmonitor.com	7	0.0-0.14639227852792677-0.0-0.1312321072016827-0.0-0.0-0.15888371628898926-0.0-0.0-0.0-0.0-0.0-0.141785470162579-0.12911502862113514-0.14848959113803403-0.14410180805965306-0.0-0.0-0.0-0.0-0.0
gpt2	ensemble	Sentence Sim	fool	21.0906	5	78_www.wired.com-45_www.npr.org-91_www.entrepreneur.com-77_www.androidheadlines.com-84_www.glassdoor.com-85_www.pcworld.com-58_medium.com	7	0.0-0.12557746882966628-0.0-0.11995633273993615-0.0-0.0-0.17490304407069626-0.0-0.0-0.0-0.0-0.0-0.14986686446108372-0.1624660627503647-0.1566616904378979-0.0-0.0-0.0-0.0-0.0-0.11056853671035502
gpt2	average	Sentence Sim	fool	21.1352	5	78_www.wired.com-45_www.npr.org-91_www.entrepreneur.com-77_www.androidheadlines.com-84_www.glassdoor.com-85_www.pcworld.com-58_medium.com	7	0.0-0.12557746882966628-0.0-0.11995633273993615-0.0-0.0-0.17490304407069626-0.0-0.0-0.0-0.0-0.0-0.14986686446108372-0.1624660627503647-0.1566616904378979-0.0-0.0-0.0-0.0-0.0-0.11056853671035502
gpt2	ensemble	Prior	fool	22.0596	5	81_www.librarything.com-37_www.instructables.com-70_www.insiderpages.com-22_forums.macrumors.com-84_www.glassdoor.com-39_www.booking.com-www.frontiersin.org	7	0.0-0.0-0.0-0.0-0.12859691305359497-0.12689056076940974-0.0-0.0-0.1505468083456139-0.0-0.0-0.13255254789420615-0.0-0.13805941208407663-0.0-0.0-0.0-0.19700612735592957-0.0-0.12634763049716902-0.0
gpt2	average	Prior	fool	21.7924	5	81_www.librarything.com-37_www.instructables.com-70_www.insiderpages.com-22_forums.macrumors.com-84_www.glassdoor.com-39_www.booking.com-www.frontiersin.org	7	0.0-0.0-0.0-0.0-0.12859691305359497-0.12689056076940974-0.0-0.0-0.1505468083456139-0.0-0.0-0.13255254789420615-0.0-0.13805941208407663-0.0-0.0-0.0-0.19700612735592957-0.0-0.12634763049716902-0.0
gpt2	ensemble	Entropy	fool	21.0495	5	15_www.dailymail.co.uk-78_www.wired.com-45_www.npr.org-91_www.entrepreneur.com-100_www.ign.com-77_www.androidheadlines.com-85_www.pcworld.com	7	0.14288879042977404-0.14268202628858367-0.0-0.1431693989071038-0.0-0.0-0.14281494609363463-0.0-0.0-0.14268202628858367-0.0-0.0-0.1428297149608625-0.0-0.14293309703145768-0.0-0.0-0.0-0.0-0.0-0.0
gpt2	average	Entropy	fool	21.1158	5	15_www.dailymail.co.uk-78_www.wired.com-45_www.npr.org-91_www.entrepreneur.com-100_www.ign.com-77_www.androidheadlines.com-85_www.pcworld.com	7	0.14288879042977404-0.14268202628858367-0.0-0.1431693989071038-0.0-0.0-0.14281494609363463-0.0-0.0-0.14268202628858367-0.0-0.0-0.1428297149608625-0.0-0.14293309703145768-0.0-0.0-0.0-0.0-0.0-0.0
gpt2-large	average	Entropy	fool	14.5158	42	15_www.dailymail.co.uk-45_www.npr.org-91_www.entrepreneur.com-100_www.ign.com-85_www.pcworld.com	5	0.1997193993629607-0.0-0.0-0.20021234642802974-0.0-0.0-0.19994691339299256-0.0-0.0-0.19998483239799789-0.0-0.0-0.0-0.0-0.2001365084180191-0.0-0.0-0.0-0.0-0.0-0.0
gpt2-large	ensemble	Entropy	fool	14.3545	42	15_www.dailymail.co.uk-45_www.npr.org-91_www.entrepreneur.com-100_www.ign.com-85_www.pcworld.com	5	0.1997193993629607-0.0-0.0-0.20021234642802974-0.0-0.0-0.19994691339299256-0.0-0.0-0.19998483239799789-0.0-0.0-0.0-0.0-0.2001365084180191-0.0-0.0-0.0-0.0-0.0-0.0
gpt2	ensemble	TF-IDF	fool	21.0495	5	78_www.wired.com-45_www.npr.org-91_www.entrepreneur.com-22_forums.macrumors.com-77_www.androidheadlines.com-84_www.glassdoor.com-85_www.pcworld.com-60_www.csmonitor.com	8	0.0-0.1299451236833151-0.0-0.11648819577797326-0.0-0.0-0.14103314991780014-0.0-0.0-0.0-0.0-0.11234987944718763-0.12585588968245043-0.11460897072073042-0.1318068034745137-0.12791198729602926-0.0-0.0-0.0-0.0-0.0
gpt2	average	TF-IDF	fool	21.1136	5	78_www.wired.com-45_www.npr.org-91_www.entrepreneur.com-22_forums.macrumors.com-77_www.androidheadlines.com-84_www.glassdoor.com-85_www.pcworld.com-60_www.csmonitor.com	8	0.0-0.1299451236833151-0.0-0.11648819577797326-0.0-0.0-0.14103314991780014-0.0-0.0-0.0-0.0-0.11234987944718763-0.12585588968245043-0.11460897072073042-0.1318068034745137-0.12791198729602926-0.0-0.0-0.0-0.0-0.0
gpt2	ensemble	Sentence Sim	fool	21.0906	5	78_www.wired.com-45_www.npr.org-91_www.entrepreneur.com-77_www.androidheadlines.com-84_www.glassdoor.com-85_www.pcworld.com-60_www.csmonitor.com-58_medium.com	8	0.0-0.11446322045413039-0.0-0.1093395836629304-0.0-0.0-0.15942322996426805-0.0-0.0-0.0-0.0-0.0-0.1366028803212014-0.1480869851114278-0.14279632944053736-0.08850511544082236-0.0-0.0-0.0-0.0-0.10078265560468225
gpt2	average	Sentence Sim	fool	21.123	5	78_www.wired.com-45_www.npr.org-91_www.entrepreneur.com-77_www.androidheadlines.com-84_www.glassdoor.com-85_www.pcworld.com-60_www.csmonitor.com-58_medium.com	8	0.0-0.11446322045413039-0.0-0.1093395836629304-0.0-0.0-0.15942322996426805-0.0-0.0-0.0-0.0-0.0-0.1366028803212014-0.1480869851114278-0.14279632944053736-0.08850511544082236-0.0-0.0-0.0-0.0-0.10078265560468225
gpt2	ensemble	Prior	fool	21.9736	5	81_www.librarything.com-37_www.instructables.com-11_link.springer.com-70_www.insiderpages.com-22_forums.macrumors.com-84_www.glassdoor.com-39_www.booking.com-www.frontiersin.org	8	0.0-0.0-0.0-0.0-0.11462150017283097-0.11310058762530245-0.0-0.10867611475976495-0.13418596612512962-0.0-0.0-0.11814725198755617-0.0-0.12305565157276184-0.0-0.0-0.0-0.1755962668510197-0.0-0.11261666090563428-0.0
gpt2	average	Prior	fool	21.7487	5	81_www.librarything.com-37_www.instructables.com-11_link.springer.com-70_www.insiderpages.com-22_forums.macrumors.com-84_www.glassdoor.com-39_www.booking.com-www.frontiersin.org	8	0.0-0.0-0.0-0.0-0.11462150017283097-0.11310058762530245-0.0-0.10867611475976495-0.13418596612512962-0.0-0.0-0.11814725198755617-0.0-0.12305565157276184-0.0-0.0-0.0-0.1755962668510197-0.0-0.11261666090563428-0.0
gpt2	ensemble	Entropy	fool	21.0495	5	15_www.dailymail.co.uk-78_www.wired.com-45_www.npr.org-91_www.entrepreneur.com-100_www.ign.com-77_www.androidheadlines.com-85_www.pcworld.com-60_www.csmonitor.com	8	0.12504287595295263-0.12488796928422054-0.0-0.12525310643194618-0.0-0.0-0.12498755214269117-0.0-0.0-0.12488796928422054-0.0-0.0-0.12499861690474347-0.0-0.12507607023910952-0.12486583976011596-0.0-0.0-0.0-0.0-0.0
gpt2	average	Entropy	fool	21.1237	5	15_www.dailymail.co.uk-78_www.wired.com-45_www.npr.org-91_www.entrepreneur.com-100_www.ign.com-77_www.androidheadlines.com-85_www.pcworld.com-60_www.csmonitor.com	8	0.12504287595295263-0.12488796928422054-0.0-0.12525310643194618-0.0-0.0-0.12498755214269117-0.0-0.0-0.12488796928422054-0.0-0.0-0.12499861690474347-0.0-0.12507607023910952-0.12486583976011596-0.0-0.0-0.0-0.0-0.0
gpt2-large	average	Entropy	fool	14.5158	10	15_www.dailymail.co.uk-45_www.npr.org-91_www.entrepreneur.com-100_www.ign.com-85_www.pcworld.com	5	0.1997193993629607-0.0-0.0-0.20021234642802974-0.0-0.0-0.19994691339299256-0.0-0.0-0.19998483239799789-0.0-0.0-0.0-0.0-0.2001365084180191-0.0-0.0-0.0-0.0-0.0-0.0
gpt2-large	ensemble	Entropy	fool	14.3545	10	15_www.dailymail.co.uk-45_www.npr.org-91_www.entrepreneur.com-100_www.ign.com-85_www.pcworld.com	5	0.1997193993629607-0.0-0.0-0.20021234642802974-0.0-0.0-0.19994691339299256-0.0-0.0-0.19998483239799789-0.0-0.0-0.0-0.0-0.2001365084180191-0.0-0.0-0.0-0.0-0.0-0.0
gpt2	ensemble	TF-IDF	fool	21.0495	5	15_www.dailymail.co.uk-78_www.wired.com-45_www.npr.org-91_www.entrepreneur.com-22_forums.macrumors.com-77_www.androidheadlines.com-84_www.glassdoor.com-85_www.pcworld.com-60_www.csmonitor.com	9	0.10100504946283878-0.12287759407547798-0.0-0.10612728334676681-0.0-0.0-0.12449203146698609-0.0-0.0-0.0-0.0-0.1011938429932096-0.11555933309489018-0.10770176162613183-0.10935471020319498-0.11168839373050367-0.0-0.0-0.0-0.0-0.0
gpt2	average	TF-IDF	fool	21.1307	5	15_www.dailymail.co.uk-78_www.wired.com-45_www.npr.org-91_www.entrepreneur.com-22_forums.macrumors.com-77_www.androidheadlines.com-84_www.glassdoor.com-85_www.pcworld.com-60_www.csmonitor.com	9	0.10100504946283878-0.12287759407547798-0.0-0.10612728334676681-0.0-0.0-0.12449203146698609-0.0-0.0-0.0-0.0-0.1011938429932096-0.11555933309489018-0.10770176162613183-0.10935471020319498-0.11168839373050367-0.0-0.0-0.0-0.0-0.0
gpt2	ensemble	Sentence Sim	fool	21.0906	5	78_www.wired.com-45_www.npr.org-91_www.entrepreneur.com-70_www.insiderpages.com-77_www.androidheadlines.com-84_www.glassdoor.com-85_www.pcworld.com-60_www.csmonitor.com-58_medium.com	9	0.0-0.10534901887087633-0.0-0.10063335468755073-0.0-0.0-0.14672906104972067-0.0-0.07962559105967537-0.0-0.0-0.0-0.12572579523517163-0.136295471393685-0.13142608730768243-0.08145784331204207-0.0-0.0-0.0-0.0-0.09275777708359571
gpt2	average	Sentence Sim	fool	21.15	5	78_www.wired.com-45_www.npr.org-91_www.entrepreneur.com-70_www.insiderpages.com-77_www.androidheadlines.com-84_www.glassdoor.com-85_www.pcworld.com-60_www.csmonitor.com-58_medium.com	9	0.0-0.10534901887087633-0.0-0.10063335468755073-0.0-0.0-0.14672906104972067-0.0-0.07962559105967537-0.0-0.0-0.0-0.12572579523517163-0.136295471393685-0.13142608730768243-0.08145784331204207-0.0-0.0-0.0-0.0-0.09275777708359571
gpt2	ensemble	Prior	fool	21.888	5	81_www.librarything.com-37_www.instructables.com-11_link.springer.com-70_www.insiderpages.com-10_www.eventbrite.com-22_forums.macrumors.com-84_www.glassdoor.com-39_www.booking.com-www.frontiersin.org	9	0.0-0.0-0.0-0.0-0.10339881509198628-0.10202681633925788-0.0-0.0980355472404116-0.12104770813844715-0.0-0.09791082008107266-0.10657935765512941-0.0-0.11100717181166199-0.0-0.0-0.0-0.1584034923604615-0.0-0.10159027128157157-0.0
gpt2	average	Prior	fool	21.7142	5	81_www.librarything.com-37_www.instructables.com-11_link.springer.com-70_www.insiderpages.com-10_www.eventbrite.com-22_forums.macrumors.com-84_www.glassdoor.com-39_www.booking.com-www.frontiersin.org	9	0.0-0.0-0.0-0.0-0.10339881509198628-0.10202681633925788-0.0-0.0980355472404116-0.12104770813844715-0.0-0.09791082008107266-0.10657935765512941-0.0-0.11100717181166199-0.0-0.0-0.0-0.1584034923604615-0.0-0.10159027128157157-0.0
gpt2	ensemble	Entropy	fool	21.0906	5	15_www.dailymail.co.uk-78_www.wired.com-45_www.npr.org-91_www.entrepreneur.com-100_www.ign.com-77_www.androidheadlines.com-85_www.pcworld.com-60_www.csmonitor.com-58_medium.com	9	0.111160775684225-0.11104043460321826-0.0-0.11132409572273415-0.0-0.0-0.1111177967267226-0.0-0.0-0.11104043460321826-0.0-0.0-0.11112639251822308-0.0-0.11118656305872644-0.11102324302021731-0.0-0.0-0.0-0.0-0.1109802640627149
gpt2	average	Entropy	fool	21.1442	5	15_www.dailymail.co.uk-78_www.wired.com-45_www.npr.org-91_www.entrepreneur.com-100_www.ign.com-77_www.androidheadlines.com-85_www.pcworld.com-60_www.csmonitor.com-58_medium.com	9	0.111160775684225-0.11104043460321826-0.0-0.11132409572273415-0.0-0.0-0.1111177967267226-0.0-0.0-0.11104043460321826-0.0-0.0-0.11112639251822308-0.0-0.11118656305872644-0.11102324302021731-0.0-0.0-0.0-0.0-0.1109802640627149
gpt2-large	average	TF-IDF	fool	14.8997	88	78_www.wired.com-91_www.entrepreneur.com-77_www.androidheadlines.com-84_www.glassdoor.com-60_www.csmonitor.com	5	0.0-0.20350383069202405-0.0-0.0-0.0-0.0-0.20423303412217114-0.0-0.0-0.0-0.0-0.0-0.19580435576359323-0.18729551143199594-0.0-0.20916326799021565-0.0-0.0-0.0-0.0-0.0
gpt2-large	ensemble	TF-IDF	fool	14.4107	88	78_www.wired.com-91_www.entrepreneur.com-77_www.androidheadlines.com-84_www.glassdoor.com-60_www.csmonitor.com	5	0.0-0.20350383069202405-0.0-0.0-0.0-0.0-0.20423303412217114-0.0-0.0-0.0-0.0-0.0-0.19580435576359323-0.18729551143199594-0.0-0.20916326799021565-0.0-0.0-0.0-0.0-0.0
gpt2-large	average	Sentence Sim	fool	14.8981	88	78_www.wired.com-91_www.entrepreneur.com-77_www.androidheadlines.com-84_www.glassdoor.com-85_www.pcworld.com	5	0.0-0.16278006707268117-0.0-0.0-0.0-0.0-0.2110056789262358-0.0-0.0-0.0-0.0-0.0-0.21273902808580872-0.21376465791842372-0.19971056799685058-0.0-0.0-0.0-0.0-0.0-0.0
gpt2-large	ensemble	Sentence Sim	fool	14.4388	88	78_www.wired.com-91_www.entrepreneur.com-77_www.androidheadlines.com-84_www.glassdoor.com-85_www.pcworld.com	5	0.0-0.16278006707268117-0.0-0.0-0.0-0.0-0.2110056789262358-0.0-0.0-0.0-0.0-0.0-0.21273902808580872-0.21376465791842372-0.19971056799685058-0.0-0.0-0.0-0.0-0.0-0.0
gpt2-large	average	Prior	fool	15.2056	88	37_www.instructables.com-70_www.insiderpages.com-84_www.glassdoor.com-39_www.booking.com-www.frontiersin.org	5	0.0-0.0-0.0-0.0-0.0-0.18232157506152585-0.0-0.0-0.1837571780147662-0.0-0.0-0.0-0.0-0.17688679245283018-0.0-0.0-0.0-0.2783018867924528-0.0-0.17873256767842494-0.0
gpt2-large	ensemble	Prior	fool	15.2207	88	37_www.instructables.com-70_www.insiderpages.com-84_www.glassdoor.com-39_www.booking.com-www.frontiersin.org	5	0.0-0.0-0.0-0.0-0.0-0.18232157506152585-0.0-0.0-0.1837571780147662-0.0-0.0-0.0-0.0-0.17688679245283018-0.0-0.0-0.0-0.2783018867924528-0.0-0.17873256767842494-0.0
gpt2-large	average	Entropy	fool	14.5158	88	15_www.dailymail.co.uk-45_www.npr.org-91_www.entrepreneur.com-100_www.ign.com-85_www.pcworld.com	5	0.1997193993629607-0.0-0.0-0.20021234642802974-0.0-0.0-0.19994691339299256-0.0-0.0-0.19998483239799789-0.0-0.0-0.0-0.0-0.2001365084180191-0.0-0.0-0.0-0.0-0.0-0.0
gpt2-large	ensemble	Entropy	fool	14.3545	88	15_www.dailymail.co.uk-45_www.npr.org-91_www.entrepreneur.com-100_www.ign.com-85_www.pcworld.com	5	0.1997193993629607-0.0-0.0-0.20021234642802974-0.0-0.0-0.19994691339299256-0.0-0.0-0.19998483239799789-0.0-0.0-0.0-0.0-0.2001365084180191-0.0-0.0-0.0-0.0-0.0-0.0
gpt2	ensemble	Prior	fool	23.2088	5	70_www.insiderpages.com-84_www.glassdoor.com-39_www.booking.com	3	0.0-0.0-0.0-0.0-0.0-0.0-0.0-0.0-0.31001437470052706-0.0-0.0-0.0-0.0-0.28429963264654207-0.0-0.0-0.0-0.4056859926529308-0.0-0.0-0.0
gpt2	average	Prior	fool	22.615	5	70_www.insiderpages.com-84_www.glassdoor.com-39_www.booking.com	3	0.0-0.0-0.0-0.0-0.0-0.0-0.0-0.0-0.31001437470052706-0.0-0.0-0.0-0.0-0.28429963264654207-0.0-0.0-0.0-0.4056859926529308-0.0-0.0-0.0
gpt2	ensemble	Entropy	fool	21.2146	5	15_www.dailymail.co.uk-45_www.npr.org-85_www.pcworld.com	3	0.33257071547420963-0.0-0.0-0.3345465890183028-0.0-0.0-0.0-0.0-0.0-0.0-0.0-0.0-0.0-0.0-0.3328826955074875-0.0-0.0-0.0-0.0-0.0-0.0
gpt2	average	Entropy	fool	21.3048	5	15_www.dailymail.co.uk-45_www.npr.org-85_www.pcworld.com	3	0.33257071547420963-0.0-0.0-0.3345465890183028-0.0-0.0-0.0-0.0-0.0-0.0-0.0-0.0-0.0-0.0-0.3328826955074875-0.0-0.0-0.0-0.0-0.0-0.0
gpt2	ensemble	TF-IDF	fool	21.0495	5	15_www.dailymail.co.uk-78_www.wired.com-45_www.npr.org-91_www.entrepreneur.com-10_www.eventbrite.com-22_forums.macrumors.com-77_www.androidheadlines.com-84_www.glassdoor.com-85_www.pcworld.com-60_www.csmonitor.com	10	0.09243364051719767-0.11245005491106314-0.0-0.09712119552548673-0.0-0.0-0.11392748922031604-0.0-0.0-0.0-0.08486119249706091-0.0926064128034455-0.10575283028429273-0.0985620617005041-0.10007473909018136-0.10221038345045187-0.0-0.0-0.0-0.0-0.0
gpt2	average	TF-IDF	fool	21.1518	5	15_www.dailymail.co.uk-78_www.wired.com-45_www.npr.org-91_www.entrepreneur.com-10_www.eventbrite.com-22_forums.macrumors.com-77_www.androidheadlines.com-84_www.glassdoor.com-85_www.pcworld.com-60_www.csmonitor.com	10	0.09243364051719767-0.11245005491106314-0.0-0.09712119552548673-0.0-0.0-0.11392748922031604-0.0-0.0-0.0-0.08486119249706091-0.0926064128034455-0.10575283028429273-0.0985620617005041-0.10007473909018136-0.10221038345045187-0.0-0.0-0.0-0.0-0.0
gpt2	ensemble	Sentence Sim	fool	21.0906	5	78_www.wired.com-45_www.npr.org-91_www.entrepreneur.com-70_www.insiderpages.com-22_forums.macrumors.com-77_www.androidheadlines.com-84_www.glassdoor.com-85_www.pcworld.com-60_www.csmonitor.com-58_medium.com	10	0.0-0.09858772485710737-0.0-0.09417471173171658-0.0-0.0-0.1373119982924739-0.0-0.07451522517354912-0.0-0.0-0.0641799428816334-0.1176567208782304-0.127548035824613-0.12299116853111883-0.07622988358101418-0.0-0.0-0.0-0.0-0.08680458824854326
gpt2	average	Sentence Sim	fool	21.1583	5	78_www.wired.com-45_www.npr.org-91_www.entrepreneur.com-70_www.insiderpages.com-22_forums.macrumors.com-77_www.androidheadlines.com-84_www.glassdoor.com-85_www.pcworld.com-60_www.csmonitor.com-58_medium.com	10	0.0-0.09858772485710737-0.0-0.09417471173171658-0.0-0.0-0.1373119982924739-0.0-0.07451522517354912-0.0-0.0-0.0641799428816334-0.1176567208782304-0.127548035824613-0.12299116853111883-0.07622988358101418-0.0-0.0-0.0-0.0-0.08680458824854326
gpt2	ensemble	Prior	fool	21.888	5	81_www.librarything.com-37_www.instructables.com-11_link.springer.com-70_www.insiderpages.com-10_www.eventbrite.com-22_forums.macrumors.com-84_www.glassdoor.com-39_www.booking.com-journals.plos.org-www.frontiersin.org	10	0.0-0.0-0.0-0.0-0.09433318161128812-0.09308147473827948-0.0-0.08944014565316341-0.11043468365953574-0.0-0.08932635411925353-0.09723486572598998-0.0-0.10127446517979062-0.0-0.0-0.0-0.14451524806554392-0.08767637687756032-0.0926832043695949-0.0
gpt2	average	Prior	fool	21.7045	5	81_www.librarything.com-37_www.instructables.com-11_link.springer.com-70_www.insiderpages.com-10_www.eventbrite.com-22_forums.macrumors.com-84_www.glassdoor.com-39_www.booking.com-journals.plos.org-www.frontiersin.org	10	0.0-0.0-0.0-0.0-0.09433318161128812-0.09308147473827948-0.0-0.08944014565316341-0.11043468365953574-0.0-0.08932635411925353-0.09723486572598998-0.0-0.10127446517979062-0.0-0.0-0.0-0.14451524806554392-0.08767637687756032-0.0926832043695949-0.0
gpt2-large	average	Entropy	fool	14.5158	5	15_www.dailymail.co.uk-45_www.npr.org-91_www.entrepreneur.com-100_www.ign.com-85_www.pcworld.com	5	0.1997193993629607-0.0-0.0-0.20021234642802974-0.0-0.0-0.19994691339299256-0.0-0.0-0.19998483239799789-0.0-0.0-0.0-0.0-0.2001365084180191-0.0-0.0-0.0-0.0-0.0-0.0
gpt2-large	ensemble	Entropy	fool	14.3545	5	15_www.dailymail.co.uk-45_www.npr.org-91_www.entrepreneur.com-100_www.ign.com-85_www.pcworld.com	5	0.1997193993629607-0.0-0.0-0.20021234642802974-0.0-0.0-0.19994691339299256-0.0-0.0-0.19998483239799789-0.0-0.0-0.0-0.0-0.2001365084180191-0.0-0.0-0.0-0.0-0.0-0.0
gpt2-large	average	TF-IDF	fool	14.5251	5	78_www.wired.com-91_www.entrepreneur.com-77_www.androidheadlines.com-85_www.pcworld.com-60_www.csmonitor.com	5	0.0-0.1979202482921216-0.0-0.0-0.0-0.0-0.21480849190753493-0.0-0.0-0.0-0.0-0.0-0.19169190985328846-0.0-0.20075578467910005-0.1948235652679549-0.0-0.0-0.0-0.0-0.0
gpt2-large	ensemble	TF-IDF	fool	14.4388	5	78_www.wired.com-91_www.entrepreneur.com-77_www.androidheadlines.com-85_www.pcworld.com-60_www.csmonitor.com	5	0.0-0.1979202482921216-0.0-0.0-0.0-0.0-0.21480849190753493-0.0-0.0-0.0-0.0-0.0-0.19169190985328846-0.0-0.20075578467910005-0.1948235652679549-0.0-0.0-0.0-0.0-0.0
gpt2-large	average	Sentence Sim	fool	14.8768	5	78_www.wired.com-91_www.entrepreneur.com-77_www.androidheadlines.com-84_www.glassdoor.com-85_www.pcworld.com	5	0.0-0.1631988661413325-0.0-0.0-0.0-0.0-0.22730175040971953-0.0-0.0-0.0-0.0-0.0-0.19476505284065468-0.2111388091702195-0.20359552143807383-0.0-0.0-0.0-0.0-0.0-0.0
gpt2-large	ensemble	Sentence Sim	fool	14.4107	5	78_www.wired.com-91_www.entrepreneur.com-77_www.androidheadlines.com-84_www.glassdoor.com-85_www.pcworld.com	5	0.0-0.1631988661413325-0.0-0.0-0.0-0.0-0.22730175040971953-0.0-0.0-0.0-0.0-0.0-0.19476505284065468-0.2111388091702195-0.20359552143807383-0.0-0.0-0.0-0.0-0.0-0.0
gpt2	ensemble	Sentence Sim-topk-uniform	fool	21.1318	5	78_www.wired.com-91_www.entrepreneur.com-77_www.androidheadlines.com-84_www.glassdoor.com-85_www.pcworld.com	5	0.0-0.2-0.0-0.0-0.0-0.0-0.2-0.0-0.0-0.0-0.0-0.0-0.2-0.2-0.2-0.0-0.0-0.0-0.0-0.0-0.0
gpt2	average	Sentence Sim-topk-uniform	fool	21.1621	5	78_www.wired.com-91_www.entrepreneur.com-77_www.androidheadlines.com-84_www.glassdoor.com-85_www.pcworld.com	5	0.0-0.2-0.0-0.0-0.0-0.0-0.2-0.0-0.0-0.0-0.0-0.0-0.2-0.2-0.2-0.0-0.0-0.0-0.0-0.0-0.0
gpt2	ensemble	Sentence Sim-topk-uniform	fool	21.1318	10	78_www.wired.com-91_www.entrepreneur.com-77_www.androidheadlines.com-84_www.glassdoor.com-85_www.pcworld.com	5	0.0-0.2-0.0-0.0-0.0-0.0-0.2-0.0-0.0-0.0-0.0-0.0-0.2-0.2-0.2-0.0-0.0-0.0-0.0-0.0-0.0
gpt2	average	Sentence Sim-topk-uniform	fool	21.1621	10	78_www.wired.com-91_www.entrepreneur.com-77_www.androidheadlines.com-84_www.glassdoor.com-85_www.pcworld.com	5	0.0-0.2-0.0-0.0-0.0-0.0-0.2-0.0-0.0-0.0-0.0-0.0-0.2-0.2-0.2-0.0-0.0-0.0-0.0-0.0-0.0
gpt2	ensemble	Sentence Sim-topk-uniform	fool	21.1318	42	78_www.wired.com-91_www.entrepreneur.com-77_www.androidheadlines.com-84_www.glassdoor.com-85_www.pcworld.com	5	0.0-0.2-0.0-0.0-0.0-0.0-0.2-0.0-0.0-0.0-0.0-0.0-0.2-0.2-0.2-0.0-0.0-0.0-0.0-0.0-0.0
gpt2	average	Sentence Sim-topk-uniform	fool	21.1621	42	78_www.wired.com-91_www.entrepreneur.com-77_www.androidheadlines.com-84_www.glassdoor.com-85_www.pcworld.com	5	0.0-0.2-0.0-0.0-0.0-0.0-0.2-0.0-0.0-0.0-0.0-0.0-0.2-0.2-0.2-0.0-0.0-0.0-0.0-0.0-0.0
gpt2	ensemble	Sentence Sim-topk-uniform	fool	21.1318	88	78_www.wired.com-91_www.entrepreneur.com-77_www.androidheadlines.com-84_www.glassdoor.com-85_www.pcworld.com	5	0.0-0.2-0.0-0.0-0.0-0.0-0.2-0.0-0.0-0.0-0.0-0.0-0.2-0.2-0.2-0.0-0.0-0.0-0.0-0.0-0.0
gpt2	average	Sentence Sim-topk-uniform	fool	21.1621	88	78_www.wired.com-91_www.entrepreneur.com-77_www.androidheadlines.com-84_www.glassdoor.com-85_www.pcworld.com	5	0.0-0.2-0.0-0.0-0.0-0.0-0.2-0.0-0.0-0.0-0.0-0.0-0.2-0.2-0.2-0.0-0.0-0.0-0.0-0.0-0.0
gpt2	ensemble	tfidf-topk-uniform	fool	21.1318	5	78_www.wired.com-91_www.entrepreneur.com-77_www.androidheadlines.com-85_www.pcworld.com-60_www.csmonitor.com	5	0.0-0.2-0.0-0.0-0.0-0.0-0.2-0.0-0.0-0.0-0.0-0.0-0.2-0.0-0.2-0.2-0.0-0.0-0.0-0.0-0.0
gpt2	average	tfidf-topk-uniform	fool	21.1157	5	78_www.wired.com-91_www.entrepreneur.com-77_www.androidheadlines.com-85_www.pcworld.com-60_www.csmonitor.com	5	0.0-0.2-0.0-0.0-0.0-0.0-0.2-0.0-0.0-0.0-0.0-0.0-0.2-0.0-0.2-0.2-0.0-0.0-0.0-0.0-0.0
gpt2	ensemble	tfidf-topk-uniform	fool	21.0906	10	78_www.wired.com-45_www.npr.org-91_www.entrepreneur.com-77_www.androidheadlines.com-60_www.csmonitor.com	5	0.0-0.2-0.0-0.2-0.0-0.0-0.2-0.0-0.0-0.0-0.0-0.0-0.2-0.0-0.0-0.2-0.0-0.0-0.0-0.0-0.0
gpt2	average	tfidf-topk-uniform	fool	21.1185	10	78_www.wired.com-45_www.npr.org-91_www.entrepreneur.com-77_www.androidheadlines.com-60_www.csmonitor.com	5	0.0-0.2-0.0-0.2-0.0-0.0-0.2-0.0-0.0-0.0-0.0-0.0-0.2-0.0-0.0-0.2-0.0-0.0-0.0-0.0-0.0
gpt2	ensemble	tfidf-topk-uniform	fool	21.1318	42	78_www.wired.com-45_www.npr.org-91_www.entrepreneur.com-85_www.pcworld.com-60_www.csmonitor.com	5	0.0-0.2-0.0-0.2-0.0-0.0-0.2-0.0-0.0-0.0-0.0-0.0-0.0-0.0-0.2-0.2-0.0-0.0-0.0-0.0-0.0
gpt2	average	tfidf-topk-uniform	fool	21.1567	42	78_www.wired.com-45_www.npr.org-91_www.entrepreneur.com-85_www.pcworld.com-60_www.csmonitor.com	5	0.0-0.2-0.0-0.2-0.0-0.0-0.2-0.0-0.0-0.0-0.0-0.0-0.0-0.0-0.2-0.2-0.0-0.0-0.0-0.0-0.0
gpt2	ensemble	tfidf-topk-uniform	fool	21.1318	88	78_www.wired.com-91_www.entrepreneur.com-77_www.androidheadlines.com-84_www.glassdoor.com-60_www.csmonitor.com	5	0.0-0.2-0.0-0.0-0.0-0.0-0.2-0.0-0.0-0.0-0.0-0.0-0.2-0.2-0.0-0.2-0.0-0.0-0.0-0.0-0.0
gpt2	average	tfidf-topk-uniform	fool	21.1608	88	78_www.wired.com-91_www.entrepreneur.com-77_www.androidheadlines.com-84_www.glassdoor.com-60_www.csmonitor.com	5	0.0-0.2-0.0-0.0-0.0-0.0-0.2-0.0-0.0-0.0-0.0-0.0-0.2-0.2-0.0-0.2-0.0-0.0-0.0-0.0-0.0
deberta	ensemble	uniform	fool	4.42515	10		21
deberta	ensemble	uniform	fool	4.4079	42		21
deberta	ensemble	uniform	fool	4.41221	88		21
gpt2	ensemble	TF-IDF	fool	21.888	10	60_www.csmonitor.com	1	0.0-0.0-0.0-0.0-0.0-0.0-0.0-0.0-0.0-0.0-0.0-0.0-0.0-0.0-0.0-1.0-0.0-0.0-0.0-0.0-0.0
gpt2	average	TF-IDF	fool	21.8732	10	60_www.csmonitor.com	1	0.0-0.0-0.0-0.0-0.0-0.0-0.0-0.0-0.0-0.0-0.0-0.0-0.0-0.0-0.0-1.0-0.0-0.0-0.0-0.0-0.0
gpt2	average	Sentence Sim	fool	21.38	10	91_www.entrepreneur.com	1	0.0-0.0-0.0-0.0-0.0-0.0-1.0-0.0-0.0-0.0-0.0-0.0-0.0-0.0-0.0-0.0-0.0-0.0-0.0-0.0-0.0
gpt2	ensemble	Sentence Sim	fool	21.3809	10	91_www.entrepreneur.com	1	0.0-0.0-0.0-0.0-0.0-0.0-1.0-0.0-0.0-0.0-0.0-0.0-0.0-0.0-0.0-0.0-0.0-0.0-0.0-0.0-0.0
gpt2	ensemble	Prior	fool	24.2278	10	journals.plos.org	1	0.0-0.0-0.0-0.0-0.0-0.0-0.0-0.0-0.0-0.0-0.0-0.0-0.0-0.0-0.0-0.0-0.0-0.0-1.0-0.0-0.0
gpt2	ensemble	TF-IDF	fool	21.3809	42	91_www.entrepreneur.com	1	0.0-0.0-0.0-0.0-0.0-0.0-1.0-0.0-0.0-0.0-0.0-0.0-0.0-0.0-0.0-0.0-0.0-0.0-0.0-0.0-0.0
gpt2	average	TF-IDF	fool	21.38	42	91_www.entrepreneur.com	1	0.0-0.0-0.0-0.0-0.0-0.0-1.0-0.0-0.0-0.0-0.0-0.0-0.0-0.0-0.0-0.0-0.0-0.0-0.0-0.0-0.0
gpt2	ensemble	TF-IDF	fool	21.888	88	60_www.csmonitor.com	1	0.0-0.0-0.0-0.0-0.0-0.0-0.0-0.0-0.0-0.0-0.0-0.0-0.0-0.0-0.0-1.0-0.0-0.0-0.0-0.0-0.0
gpt2	average	TF-IDF	fool	21.8732	88	60_www.csmonitor.com	1	0.0-0.0-0.0-0.0-0.0-0.0-0.0-0.0-0.0-0.0-0.0-0.0-0.0-0.0-0.0-1.0-0.0-0.0-0.0-0.0-0.0
gpt2	ensemble	TF-IDF	fool	21.3809	10	78_www.wired.com-60_www.csmonitor.com	2	0.0-0.49675748835862826-0.0-0.0-0.0-0.0-0.0-0.0-0.0-0.0-0.0-0.0-0.0-0.0-0.0-0.5032425116413717-0.0-0.0-0.0-0.0-0.0
gpt2	average	TF-IDF	fool	21.3509	10	78_www.wired.com-60_www.csmonitor.com	2	0.0-0.49675748835862826-0.0-0.0-0.0-0.0-0.0-0.0-0.0-0.0-0.0-0.0-0.0-0.0-0.0-0.5032425116413717-0.0-0.0-0.0-0.0-0.0
gpt2	ensemble	TF-IDF	fool	21.2146	42	78_www.wired.com-91_www.entrepreneur.com	2	0.0-0.485857353162698-0.0-0.0-0.0-0.0-0.5141426468373018-0.0-0.0-0.0-0.0-0.0-0.0-0.0-0.0-0.0-0.0-0.0-0.0-0.0-0.0
gpt2	average	TF-IDF	fool	21.1924	42	78_www.wired.com-91_www.entrepreneur.com	2	0.0-0.485857353162698-0.0-0.0-0.0-0.0-0.5141426468373018-0.0-0.0-0.0-0.0-0.0-0.0-0.0-0.0-0.0-0.0-0.0-0.0-0.0-0.0
deberta	average	TF-IDF	fool	6.24164	10	78_www.wired.com-91_www.entrepreneur.com-77_www.androidheadlines.com-84_www.glassdoor.com-60_www.csmonitor.com	5	0.0-0.21336107462966172-0.0-0.0-0.0-0.0-0.20153414954800483-0.0-0.0-0.0-0.0-0.0-0.19607579603661912-0.190815609652046-0.0-0.19821337013366824-0.0-0.0-0.0-0.0-0.0
deberta	average	TF-IDF	fool	4.17479	10	78_www.wired.com	1	0.0-1.0-0.0-0.0-0.0-0.0-0.0-0.0-0.0-0.0-0.0-0.0-0.0-0.0-0.0-0.0-0.0-0.0-0.0-0.0-0.0
deberta	average	TF-IDF	fool	4.77279	10	78_www.wired.com-91_www.entrepreneur.com	2	0.0-0.5142529057849463-0.0-0.0-0.0-0.0-0.48574709421505374-0.0-0.0-0.0-0.0-0.0-0.0-0.0-0.0-0.0-0.0-0.0-0.0-0.0-0.0
deberta	average	TF-IDF	fool	5.12254	10	78_www.wired.com-91_www.entrepreneur.com-60_www.csmonitor.com	3	0.0-0.3479988318697708-0.0-0.0-0.0-0.0-0.3287087335227703-0.0-0.0-0.0-0.0-0.0-0.0-0.0-0.0-0.32329243460745893-0.0-0.0-0.0-0.0-0.0
deberta	ensemble	TF-IDF	fool	4.11665	10	78_www.wired.com-91_www.entrepreneur.com-60_www.csmonitor.com	3	0.0-0.3321943410790892-0.0-0.0-0.0-0.0-0.3312746181708983-0.0-0.0-0.0-0.0-0.0-0.0-0.0-0.0-0.33653104075001244-0.0-0.0-0.0-0.0-0.0
deberta	average	Sentence Sim	fool	9.79589	5	84_www.glassdoor.com	1	0.0-0.0-0.0-0.0-0.0-0.0-0.0-0.0-0.0-0.0-0.0-0.0-0.0-1.0-0.0-0.0-0.0-0.0-0.0-0.0-0.0
deberta	average	Sentence Sim	fool	9.82843	10	84_www.glassdoor.com	1	0.0-0.0-0.0-0.0-0.0-0.0-0.0-0.0-0.0-0.0-0.0-0.0-0.0-1.0-0.0-0.0-0.0-0.0-0.0-0.0-0.0
gpt2	average	TF-IDF	fool	21.2708	88	91_www.entrepreneur.com-60_www.csmonitor.com	2	0.0-0.0-0.0-0.0-0.0-0.0-0.4940369158567072-0.0-0.0-0.0-0.0-0.0-0.0-0.0-0.0-0.5059630841432928-0.0-0.0-0.0-0.0-0.0
gpt2	ensemble	TF-IDF	fool	21.2976	88	91_www.entrepreneur.com-60_www.csmonitor.com	2	0.0-0.0-0.0-0.0-0.0-0.0-0.4940369158567072-0.0-0.0-0.0-0.0-0.0-0.0-0.0-0.0-0.5059630841432928-0.0-0.0-0.0-0.0-0.0
gpt2	ensemble	TF-IDF	fool	21.2146	10	78_www.wired.com-91_www.entrepreneur.com-60_www.csmonitor.com	3	0.0-0.3321943410790892-0.0-0.0-0.0-0.0-0.3312746181708983-0.0-0.0-0.0-0.0-0.0-0.0-0.0-0.0-0.33653104075001244-0.0-0.0-0.0-0.0-0.0
gpt2	average	TF-IDF	fool	21.2027	10	78_www.wired.com-91_www.entrepreneur.com-60_www.csmonitor.com	3	0.0-0.3321943410790892-0.0-0.0-0.0-0.0-0.3312746181708983-0.0-0.0-0.0-0.0-0.0-0.0-0.0-0.0-0.33653104075001244-0.0-0.0-0.0-0.0-0.0
gpt2	ensemble	TF-IDF	fool	21.1732	42	78_www.wired.com-91_www.entrepreneur.com-85_www.pcworld.com	3	0.0-0.33131086737328436-0.0-0.0-0.0-0.0-0.35059888497812025-0.0-0.0-0.0-0.0-0.0-0.0-0.0-0.3180902476485953-0.0-0.0-0.0-0.0-0.0-0.0
gpt2	average	TF-IDF	fool	21.1622	42	78_www.wired.com-91_www.entrepreneur.com-85_www.pcworld.com	3	0.0-0.33131086737328436-0.0-0.0-0.0-0.0-0.35059888497812025-0.0-0.0-0.0-0.0-0.0-0.0-0.0-0.3180902476485953-0.0-0.0-0.0-0.0-0.0-0.0
gpt2	ensemble	TF-IDF	fool	21.2146	88	78_www.wired.com-91_www.entrepreneur.com-60_www.csmonitor.com	3	0.0-0.329881320930993-0.0-0.0-0.0-0.0-0.3310633654652228-0.0-0.0-0.0-0.0-0.0-0.0-0.0-0.0-0.3390553136037842-0.0-0.0-0.0-0.0-0.0
gpt2	average	TF-IDF	fool	21.2034	88	78_www.wired.com-91_www.entrepreneur.com-60_www.csmonitor.com	3	0.0-0.329881320930993-0.0-0.0-0.0-0.0-0.3310633654652228-0.0-0.0-0.0-0.0-0.0-0.0-0.0-0.0-0.3390553136037842-0.0-0.0-0.0-0.0-0.0
gpt2	ensemble	TF-IDF	fool	21.1318	10	78_www.wired.com-91_www.entrepreneur.com-77_www.androidheadlines.com-60_www.csmonitor.com	4	0.0-0.2521049034825186-0.0-0.0-0.0-0.0-0.25140691851911756-0.0-0.0-0.0-0.0-0.0-0.24109211895786864-0.0-0.0-0.25539605904049506-0.0-0.0-0.0-0.0-0.0
gpt2	average	TF-IDF	fool	21.1272	10	78_www.wired.com-91_www.entrepreneur.com-77_www.androidheadlines.com-60_www.csmonitor.com	4	0.0-0.2521049034825186-0.0-0.0-0.0-0.0-0.25140691851911756-0.0-0.0-0.0-0.0-0.0-0.24109211895786864-0.0-0.0-0.25539605904049506-0.0-0.0-0.0-0.0-0.0
gpt2	ensemble	TF-IDF	fool	21.1732	42	78_www.wired.com-91_www.entrepreneur.com-85_www.pcworld.com-60_www.csmonitor.com	4	0.0-0.25311069960661914-0.0-0.0-0.0-0.0-0.26784611613156-0.0-0.0-0.0-0.0-0.0-0.0-0.0-0.24301057722222746-0.23603260703959333-0.0-0.0-0.0-0.0-0.0
gpt2	average	TF-IDF	fool	21.156	42	78_www.wired.com-91_www.entrepreneur.com-85_www.pcworld.com-60_www.csmonitor.com	4	0.0-0.25311069960661914-0.0-0.0-0.0-0.0-0.26784611613156-0.0-0.0-0.0-0.0-0.0-0.0-0.0-0.24301057722222746-0.23603260703959333-0.0-0.0-0.0-0.0-0.0
gpt2	ensemble	TF-IDF	fool	21.1318	88	78_www.wired.com-91_www.entrepreneur.com-77_www.androidheadlines.com-60_www.csmonitor.com	4	0.0-0.25040323211528026-0.0-0.0-0.0-0.0-0.2513004874404378-0.0-0.0-0.0-0.0-0.0-0.2409293396528461-0.0-0.0-0.25736694079143585-0.0-0.0-0.0-0.0-0.0
gpt2	average	TF-IDF	fool	21.1274	88	78_www.wired.com-91_www.entrepreneur.com-77_www.androidheadlines.com-60_www.csmonitor.com	4	0.0-0.25040323211528026-0.0-0.0-0.0-0.0-0.2513004874404378-0.0-0.0-0.0-0.0-0.0-0.2409293396528461-0.0-0.0-0.25736694079143585-0.0-0.0-0.0-0.0-0.0
gpt2	ensemble	TF-IDF	fool	21.0906	10	78_www.wired.com-45_www.npr.org-91_www.entrepreneur.com-77_www.androidheadlines.com-85_www.pcworld.com-60_www.csmonitor.com	6	0.0-0.17068268935108144-0.0-0.16284592507960263-0.0-0.0-0.1702101322963228-0.0-0.0-0.0-0.0-0.0-0.16322669919005878-0.0-0.16012365229350542-0.17291090178942908-0.0-0.0-0.0-0.0-0.0
gpt2	average	TF-IDF	fool	21.1051	10	78_www.wired.com-45_www.npr.org-91_www.entrepreneur.com-77_www.androidheadlines.com-85_www.pcworld.com-60_www.csmonitor.com	6	0.0-0.17068268935108144-0.0-0.16284592507960263-0.0-0.0-0.1702101322963228-0.0-0.0-0.0-0.0-0.0-0.16322669919005878-0.0-0.16012365229350542-0.17291090178942908-0.0-0.0-0.0-0.0-0.0
deberta	average	Sentence Sim	tripadv	5.58891	5	39_www.booking.com	1	0.0-0.0-0.0-0.0-0.0-0.0-0.0-0.0-0.0-0.0-0.0-0.0-0.0-0.0-0.0-0.0-0.0-1.0-0.0-0.0-0.0
deberta	average	Sentence Sim	tripadv	5.56007	10	39_www.booking.com	1	0.0-0.0-0.0-0.0-0.0-0.0-0.0-0.0-0.0-0.0-0.0-0.0-0.0-0.0-0.0-0.0-0.0-1.0-0.0-0.0-0.0
deberta	average	Sentence Sim	fool	4.29256	42	91_www.entrepreneur.com	1	0.0-0.0-0.0-0.0-0.0-0.0-1.0-0.0-0.0-0.0-0.0-0.0-0.0-0.0-0.0-0.0-0.0-0.0-0.0-0.0-0.0
deberta	average	Sentence Sim	fool	4.29256	88	91_www.entrepreneur.com	1	0.0-0.0-0.0-0.0-0.0-0.0-1.0-0.0-0.0-0.0-0.0-0.0-0.0-0.0-0.0-0.0-0.0-0.0-0.0-0.0-0.0
deberta	average	Sentence Sim	fool	6.41718	5	91_www.entrepreneur.com-77_www.androidheadlines.com-84_www.glassdoor.com	3	0.0-0.0-0.0-0.0-0.0-0.0-0.33658371163596723-0.0-0.0-0.0-0.0-0.0-0.3263445723598697-0.3370717160041632-0.0-0.0-0.0-0.0-0.0-0.0-0.0
deberta	average	Sentence Sim	fool	6.45675	10	91_www.entrepreneur.com-77_www.androidheadlines.com-84_www.glassdoor.com	3	0.0-0.0-0.0-0.0-0.0-0.0-0.33178506682805786-0.0-0.0-0.0-0.0-0.0-0.3228955412894514-0.34531939188249067-0.0-0.0-0.0-0.0-0.0-0.0-0.0
deberta	ensemble	Sentence Sim	fool	4.8791	88	91_www.entrepreneur.com-77_www.androidheadlines.com-84_www.glassdoor.com	3	0.0-0.0-0.0-0.0-0.0-0.0-0.3309844380862542-0.0-0.0-0.0-0.0-0.0-0.33370337721864163-0.33531218469510415-0.0-0.0-0.0-0.0-0.0-0.0-0.0
deberta	average	TF-IDF	fool	5.19523	42	78_www.wired.com-45_www.npr.org-91_www.entrepreneur.com-85_www.pcworld.com-60_www.csmonitor.com	5	0.0-0.1997028046218086-0.0-0.18855058290756257-0.0-0.0-0.21452017772758647-0.0-0.0-0.0-0.0-0.0-0.0-0.0-0.2019076794433291-0.1953187552997134-0.0-0.0-0.0-0.0-0.0
deberta	average	TF-IDF	fool	4.27234	42	91_www.entrepreneur.com	1	0.0-0.0-0.0-0.0-0.0-0.0-1.0-0.0-0.0-0.0-0.0-0.0-0.0-0.0-0.0-0.0-0.0-0.0-0.0-0.0-0.0
deberta	average	TF-IDF	fool	4.80831	42	91_www.entrepreneur.com-85_www.pcworld.com	2	0.0-0.0-0.0-0.0-0.0-0.0-0.5151436774306394-0.0-0.0-0.0-0.0-0.0-0.0-0.0-0.48485632256936073-0.0-0.0-0.0-0.0-0.0-0.0
deberta	average	TF-IDF	fool	4.91271	42	78_www.wired.com-91_www.entrepreneur.com-85_www.pcworld.com	3	0.0-0.3241241136104856-0.0-0.0-0.0-0.0-0.34817318960138743-0.0-0.0-0.0-0.0-0.0-0.0-0.0-0.32770269678812697-0.0-0.0-0.0-0.0-0.0-0.0
deberta	ensemble	TF-IDF	fool	4.19784	42	78_www.wired.com-91_www.entrepreneur.com-85_www.pcworld.com	3	0.0-0.33131086737328436-0.0-0.0-0.0-0.0-0.35059888497812025-0.0-0.0-0.0-0.0-0.0-0.0-0.0-0.3180902476485953-0.0-0.0-0.0-0.0-0.0-0.0
deberta	average	TF-IDF	fool	5.80379	88	78_www.wired.com-91_www.entrepreneur.com-22_forums.macrumors.com-77_www.androidheadlines.com-60_www.csmonitor.com	5	0.0-0.20251269340686986-0.0-0.0-0.0-0.0-0.21910898034711238-0.0-0.0-0.0-0.0-0.18946106793858594-0.18876806615772626-0.0-0.0-0.2001491921497055-0.0-0.0-0.0-0.0-0.0
deberta	average	TF-IDF	fool	4.29256	88	91_www.entrepreneur.com	1	0.0-0.0-0.0-0.0-0.0-0.0-1.0-0.0-0.0-0.0-0.0-0.0-0.0-0.0-0.0-0.0-0.0-0.0-0.0-0.0-0.0
deberta	average	TF-IDF	fool	4.78229	88	78_www.wired.com-91_www.entrepreneur.com	2	0.0-0.48031850830571093-0.0-0.0-0.0-0.0-0.519681491694289-0.0-0.0-0.0-0.0-0.0-0.0-0.0-0.0-0.0-0.0-0.0-0.0-0.0-0.0
deberta	average	TF-IDF	fool	5.14337	88	78_www.wired.com-91_www.entrepreneur.com-60_www.csmonitor.com	3	0.0-0.3257030917853251-0.0-0.0-0.0-0.0-0.3523950579907878-0.0-0.0-0.0-0.0-0.0-0.0-0.0-0.0-0.3219018502238871-0.0-0.0-0.0-0.0-0.0
deberta	ensemble	TF-IDF	fool	4.10861	88	78_www.wired.com-91_www.entrepreneur.com-60_www.csmonitor.com	3	0.0-0.329881320930993-0.0-0.0-0.0-0.0-0.3310633654652228-0.0-0.0-0.0-0.0-0.0-0.0-0.0-0.0-0.3390553136037842-0.0-0.0-0.0-0.0-0.0
gpt2	ensemble	Entropy-topk-uniform	fool	21.0495	10	15_www.dailymail.co.uk-78_www.wired.com-45_www.npr.org-91_www.entrepreneur.com-100_www.ign.com-77_www.androidheadlines.com-85_www.pcworld.com	6	0.14285714285714285-0.14285714285714285-0.0-0.14285714285714285-0.0-0.0-0.14285714285714285-0.0-0.0-0.14285714285714285-0.0-0.0-0.14285714285714285-0.0-0.14285714285714285-0.0-0.0-0.0-0.0-0.0-0.0
gpt2	average	Entropy-topk-uniform	fool	21.1158	10	15_www.dailymail.co.uk-78_www.wired.com-45_www.npr.org-91_www.entrepreneur.com-100_www.ign.com-77_www.androidheadlines.com-85_www.pcworld.com	6	0.14285714285714285-0.14285714285714285-0.0-0.14285714285714285-0.0-0.0-0.14285714285714285-0.0-0.0-0.14285714285714285-0.0-0.0-0.14285714285714285-0.0-0.14285714285714285-0.0-0.0-0.0-0.0-0.0-0.0
gpt2	ensemble	Entropy-topk-uniform	fool	21.0495	10	15_www.dailymail.co.uk-78_www.wired.com-45_www.npr.org-91_www.entrepreneur.com-100_www.ign.com-77_www.androidheadlines.com-85_www.pcworld.com	7	0.14285714285714285-0.14285714285714285-0.0-0.14285714285714285-0.0-0.0-0.14285714285714285-0.0-0.0-0.14285714285714285-0.0-0.0-0.14285714285714285-0.0-0.14285714285714285-0.0-0.0-0.0-0.0-0.0-0.0
gpt2	average	Entropy-topk-uniform	fool	21.1158	10	15_www.dailymail.co.uk-78_www.wired.com-45_www.npr.org-91_www.entrepreneur.com-100_www.ign.com-77_www.androidheadlines.com-85_www.pcworld.com	7	0.14285714285714285-0.14285714285714285-0.0-0.14285714285714285-0.0-0.0-0.14285714285714285-0.0-0.0-0.14285714285714285-0.0-0.0-0.14285714285714285-0.0-0.14285714285714285-0.0-0.0-0.0-0.0-0.0-0.0
gpt2	ensemble	Entropy-topk-uniform	fool	21.0495	10	15_www.dailymail.co.uk-78_www.wired.com-45_www.npr.org-91_www.entrepreneur.com-100_www.ign.com-77_www.androidheadlines.com-85_www.pcworld.com-60_www.csmonitor.com	8	0.125-0.125-0.0-0.125-0.0-0.0-0.125-0.0-0.0-0.125-0.0-0.0-0.125-0.0-0.125-0.125-0.0-0.0-0.0-0.0-0.0
gpt2	average	Entropy-topk-uniform	fool	21.1237	10	15_www.dailymail.co.uk-78_www.wired.com-45_www.npr.org-91_www.entrepreneur.com-100_www.ign.com-77_www.androidheadlines.com-85_www.pcworld.com-60_www.csmonitor.com	8	0.125-0.125-0.0-0.125-0.0-0.0-0.125-0.0-0.0-0.125-0.0-0.0-0.125-0.0-0.125-0.125-0.0-0.0-0.0-0.0-0.0
gpt2	ensemble	Entropy-topk-uniform	fool	21.0906	10	15_www.dailymail.co.uk-78_www.wired.com-45_www.npr.org-91_www.entrepreneur.com-100_www.ign.com-77_www.androidheadlines.com-85_www.pcworld.com-60_www.csmonitor.com-58_medium.com	9	0.1111111111111111-0.1111111111111111-0.0-0.1111111111111111-0.0-0.0-0.1111111111111111-0.0-0.0-0.1111111111111111-0.0-0.0-0.1111111111111111-0.0-0.1111111111111111-0.1111111111111111-0.0-0.0-0.0-0.0-0.1111111111111111
gpt2	average	Entropy-topk-uniform	fool	21.1443	10	15_www.dailymail.co.uk-78_www.wired.com-45_www.npr.org-91_www.entrepreneur.com-100_www.ign.com-77_www.androidheadlines.com-85_www.pcworld.com-60_www.csmonitor.com-58_medium.com	9	0.1111111111111111-0.1111111111111111-0.0-0.1111111111111111-0.0-0.0-0.1111111111111111-0.0-0.0-0.1111111111111111-0.0-0.0-0.1111111111111111-0.0-0.1111111111111111-0.1111111111111111-0.0-0.0-0.0-0.0-0.1111111111111111
gpt2	ensemble	Entropy-topk-uniform	fool	21.1318	10	15_www.dailymail.co.uk-78_www.wired.com-17_www.express.co.uk-45_www.npr.org-91_www.entrepreneur.com-100_www.ign.com-77_www.androidheadlines.com-85_www.pcworld.com-60_www.csmonitor.com-58_medium.com	10	0.1-0.1-0.1-0.1-0.0-0.0-0.1-0.0-0.0-0.1-0.0-0.0-0.1-0.0-0.1-0.1-0.0-0.0-0.0-0.0-0.1
gpt2	average	Entropy-topk-uniform	fool	21.1882	10	15_www.dailymail.co.uk-78_www.wired.com-17_www.express.co.uk-45_www.npr.org-91_www.entrepreneur.com-100_www.ign.com-77_www.androidheadlines.com-85_www.pcworld.com-60_www.csmonitor.com-58_medium.com	10	0.1-0.1-0.1-0.1-0.0-0.0-0.1-0.0-0.0-0.1-0.0-0.0-0.1-0.0-0.1-0.1-0.0-0.0-0.0-0.0-0.1
gpt2	ensemble	TF-IDF	fool	21.0906	42	78_www.wired.com-45_www.npr.org-91_www.entrepreneur.com-77_www.androidheadlines.com-85_www.pcworld.com-60_www.csmonitor.com	6	0.0-0.1726119518268317-0.0-0.1601994078423654-0.0-0.0-0.18266095019515227-0.0-0.0-0.0-0.0-0.0-0.15783830413463676-0.0-0.16572404925625964-0.16096533674475422-0.0-0.0-0.0-0.0-0.0
gpt2	average	TF-IDF	fool	21.1019	42	78_www.wired.com-45_www.npr.org-91_www.entrepreneur.com-77_www.androidheadlines.com-85_www.pcworld.com-60_www.csmonitor.com	6	0.0-0.1726119518268317-0.0-0.1601994078423654-0.0-0.0-0.18266095019515227-0.0-0.0-0.0-0.0-0.0-0.15783830413463676-0.0-0.16572404925625964-0.16096533674475422-0.0-0.0-0.0-0.0-0.0
gpt2	ensemble	TF-IDF	fool	21.0495	88	78_www.wired.com-45_www.npr.org-91_www.entrepreneur.com-77_www.androidheadlines.com-84_www.glassdoor.com-60_www.csmonitor.com	6	0.0-0.17150336315525425-0.0-0.1572474946931012-0.0-0.0-0.17211790117288908-0.0-0.0-0.0-0.0-0.0-0.1650146113697715-0.1578437614920515-0.0-0.17627286811693252-0.0-0.0-0.0-0.0-0.0
gpt2	average	TF-IDF	fool	21.1229	88	78_www.wired.com-45_www.npr.org-91_www.entrepreneur.com-77_www.androidheadlines.com-84_www.glassdoor.com-60_www.csmonitor.com	6	0.0-0.17150336315525425-0.0-0.1572474946931012-0.0-0.0-0.17211790117288908-0.0-0.0-0.0-0.0-0.0-0.1650146113697715-0.1578437614920515-0.0-0.17627286811693252-0.0-0.0-0.0-0.0-0.0
gpt2	average	TF-IDF	fool	21.1111	10	78_www.wired.com-45_www.npr.org-91_www.entrepreneur.com-22_forums.macrumors.com-77_www.androidheadlines.com-85_www.pcworld.com-60_www.csmonitor.com	7	0.0-0.14731791071779016-0.0-0.14055392226851413-0.0-0.0-0.14691004206827057-0.0-0.0-0.0-0.0-0.13689014815809286-0.14088257215457517-0.0-0.13820430180743248-0.14924110282532468-0.0-0.0-0.0-0.0-0.0
gpt2	ensemble	TF-IDF	fool	21.0495	10	78_www.wired.com-45_www.npr.org-91_www.entrepreneur.com-22_forums.macrumors.com-77_www.androidheadlines.com-85_www.pcworld.com-60_www.csmonitor.com	7	0.0-0.14731791071779016-0.0-0.14055392226851413-0.0-0.0-0.14691004206827057-0.0-0.0-0.0-0.0-0.13689014815809286-0.14088257215457517-0.0-0.13820430180743248-0.14924110282532468-0.0-0.0-0.0-0.0-0.0
gpt2	average	TF-IDF	fool	21.0967	42	78_www.wired.com-45_www.npr.org-91_www.entrepreneur.com-77_www.androidheadlines.com-84_www.glassdoor.com-85_www.pcworld.com-60_www.csmonitor.com	7	0.0-0.1498862618332807-0.0-0.13910792465568306-0.0-0.0-0.15861223233912009-0.0-0.0-0.0-0.0-0.0-0.1370576783963326-0.1316576850735688-0.14390520457016243-0.13977301313185245-0.0-0.0-0.0-0.0-0.0
gpt2	ensemble	TF-IDF	fool	21.0495	42	78_www.wired.com-45_www.npr.org-91_www.entrepreneur.com-77_www.androidheadlines.com-84_www.glassdoor.com-85_www.pcworld.com-60_www.csmonitor.com	7	0.0-0.1498862618332807-0.0-0.13910792465568306-0.0-0.0-0.15861223233912009-0.0-0.0-0.0-0.0-0.0-0.1370576783963326-0.1316576850735688-0.14390520457016243-0.13977301313185245-0.0-0.0-0.0-0.0-0.0
gpt2	average	TF-IDF	fool	21.1413	88	78_www.wired.com-45_www.npr.org-91_www.entrepreneur.com-22_forums.macrumors.com-77_www.androidheadlines.com-84_www.glassdoor.com-60_www.csmonitor.com	7	0.0-0.14841337130776255-0.0-0.13607681148489287-0.0-0.0-0.14894517230172566-0.0-0.0-0.0-0.0-0.13463288079423452-0.1427982188679181-0.13659280116697853-0.0-0.1525407440764877-0.0-0.0-0.0-0.0-0.0
gpt2	ensemble	TF-IDF	fool	21.0906	88	78_www.wired.com-45_www.npr.org-91_www.entrepreneur.com-22_forums.macrumors.com-77_www.androidheadlines.com-84_www.glassdoor.com-60_www.csmonitor.com	7	0.0-0.14841337130776255-0.0-0.13607681148489287-0.0-0.0-0.14894517230172566-0.0-0.0-0.0-0.0-0.13463288079423452-0.1427982188679181-0.13659280116697853-0.0-0.1525407440764877-0.0-0.0-0.0-0.0-0.0
gpt2	average	TF-IDF	fool	21.1197	10	78_www.wired.com-45_www.npr.org-91_www.entrepreneur.com-22_forums.macrumors.com-77_www.androidheadlines.com-84_www.glassdoor.com-85_www.pcworld.com-60_www.csmonitor.com	8	0.0-0.1296931915055911-0.0-0.12373842846951973-0.0-0.0-0.1293341191659582-0.0-0.0-0.0-0.0-0.12051297845450867-0.12402775956581022-0.11963731447401445-0.1216699102904351-0.13138629807416258-0.0-0.0-0.0-0.0-0.0
gpt2	ensemble	TF-IDF	fool	21.0495	10	78_www.wired.com-45_www.npr.org-91_www.entrepreneur.com-22_forums.macrumors.com-77_www.androidheadlines.com-84_www.glassdoor.com-85_www.pcworld.com-60_www.csmonitor.com	8	0.0-0.1296931915055911-0.0-0.12373842846951973-0.0-0.0-0.1293341191659582-0.0-0.0-0.0-0.0-0.12051297845450867-0.12402775956581022-0.11963731447401445-0.1216699102904351-0.13138629807416258-0.0-0.0-0.0-0.0-0.0
gpt2	average	TF-IDF	fool	21.1196	42	78_www.wired.com-45_www.npr.org-91_www.entrepreneur.com-77_www.androidheadlines.com-84_www.glassdoor.com-85_www.pcworld.com-60_www.csmonitor.com-58_medium.com	8	0.0-0.13271221908496944-0.0-0.1231688691649076-0.0-0.0-0.14043836353167025-0.0-0.0-0.0-0.0-0.0-0.1213535411460415-0.11657228175547019-0.1274164743505681-0.12375775147126906-0.0-0.0-0.0-0.0-0.11458049949510384
gpt2	ensemble	TF-IDF	fool	21.0906	42	78_www.wired.com-45_www.npr.org-91_www.entrepreneur.com-77_www.androidheadlines.com-84_www.glassdoor.com-85_www.pcworld.com-60_www.csmonitor.com-58_medium.com	8	0.0-0.13271221908496944-0.0-0.1231688691649076-0.0-0.0-0.14043836353167025-0.0-0.0-0.0-0.0-0.0-0.1213535411460415-0.11657228175547019-0.1274164743505681-0.12375775147126906-0.0-0.0-0.0-0.0-0.11458049949510384
gpt2	average	TF-IDF	fool	21.1202	88	78_www.wired.com-45_www.npr.org-91_www.entrepreneur.com-22_forums.macrumors.com-77_www.androidheadlines.com-84_www.glassdoor.com-85_www.pcworld.com-60_www.csmonitor.com	8	0.0-0.13120407351184105-0.0-0.12029800158839866-0.0-0.0-0.13167420943080022-0.0-0.0-0.0-0.0-0.11902150212737449-0.1262400270313538-0.12075415959884726-0.11595517064452954-0.13485285606685507-0.0-0.0-0.0-0.0-0.0
gpt2	ensemble	TF-IDF	fool	21.0495	88	78_www.wired.com-45_www.npr.org-91_www.entrepreneur.com-22_forums.macrumors.com-77_www.androidheadlines.com-84_www.glassdoor.com-85_www.pcworld.com-60_www.csmonitor.com	8	0.0-0.13120407351184105-0.0-0.12029800158839866-0.0-0.0-0.13167420943080022-0.0-0.0-0.0-0.0-0.11902150212737449-0.1262400270313538-0.12075415959884726-0.11595517064452954-0.13485285606685507-0.0-0.0-0.0-0.0-0.0
gpt2	average	TF-IDF	fool	21.1349	10	15_www.dailymail.co.uk-78_www.wired.com-45_www.npr.org-91_www.entrepreneur.com-22_forums.macrumors.com-77_www.androidheadlines.com-84_www.glassdoor.com-85_www.pcworld.com-60_www.csmonitor.com	9	0.10066988032735448-0.12390199285564892-0.0-0.1020199955310447-0.0-0.0-0.11703391914766231-0.0-0.0-0.0-0.0-0.10904182900603111-0.11386417096868826-0.11080950142799523-0.10755321826079343-0.11510549247478168-0.0-0.0-0.0-0.0-0.0
gpt2	ensemble	TF-IDF	fool	21.0495	10	15_www.dailymail.co.uk-78_www.wired.com-45_www.npr.org-91_www.entrepreneur.com-22_forums.macrumors.com-77_www.androidheadlines.com-84_www.glassdoor.com-85_www.pcworld.com-60_www.csmonitor.com	9	0.10066988032735448-0.12390199285564892-0.0-0.1020199955310447-0.0-0.0-0.11703391914766231-0.0-0.0-0.0-0.0-0.10904182900603111-0.11386417096868826-0.11080950142799523-0.10755321826079343-0.11510549247478168-0.0-0.0-0.0-0.0-0.0
gpt2	average	TF-IDF	fool	21.1293	42	15_www.dailymail.co.uk-78_www.wired.com-45_www.npr.org-91_www.entrepreneur.com-22_forums.macrumors.com-77_www.androidheadlines.com-84_www.glassdoor.com-85_www.pcworld.com-60_www.csmonitor.com	9	0.09850854604565983-0.11666572760513438-0.0-0.11015063602607399-0.0-0.0-0.12532198868196828-0.0-0.0-0.0-0.0-0.10204781991653232-0.10763842425422104-0.10760846890119109-0.11795380828992032-0.11410458027929869-0.0-0.0-0.0-0.0-0.0
gpt2	ensemble	TF-IDF	fool	21.0495	42	15_www.dailymail.co.uk-78_www.wired.com-45_www.npr.org-91_www.entrepreneur.com-22_forums.macrumors.com-77_www.androidheadlines.com-84_www.glassdoor.com-85_www.pcworld.com-60_www.csmonitor.com	9	0.09850854604565983-0.11666572760513438-0.0-0.11015063602607399-0.0-0.0-0.12532198868196828-0.0-0.0-0.0-0.0-0.10204781991653232-0.10763842425422104-0.10760846890119109-0.11795380828992032-0.11410458027929869-0.0-0.0-0.0-0.0-0.0
gpt2	average	TF-IDF	fool	21.1313	88	15_www.dailymail.co.uk-78_www.wired.com-45_www.npr.org-91_www.entrepreneur.com-22_forums.macrumors.com-77_www.androidheadlines.com-84_www.glassdoor.com-85_www.pcworld.com-60_www.csmonitor.com	9	0.09772569673283141-0.11843216886192892-0.0-0.10500347454620428-0.0-0.0-0.12813790248445725-0.0-0.0-0.0-0.0-0.11079940132830618-0.11039412449083162-0.10540749726448072-0.10704977300962658-0.117049961281333-0.0-0.0-0.0-0.0-0.0
gpt2	ensemble	TF-IDF	fool	21.0495	88	15_www.dailymail.co.uk-78_www.wired.com-45_www.npr.org-91_www.entrepreneur.com-22_forums.macrumors.com-77_www.androidheadlines.com-84_www.glassdoor.com-85_www.pcworld.com-60_www.csmonitor.com	9	0.09772569673283141-0.11843216886192892-0.0-0.10500347454620428-0.0-0.0-0.12813790248445725-0.0-0.0-0.0-0.0-0.11079940132830618-0.11039412449083162-0.10540749726448072-0.10704977300962658-0.117049961281333-0.0-0.0-0.0-0.0-0.0
gpt2	average	TF-IDF	fool	21.1566	10	15_www.dailymail.co.uk-78_www.wired.com-45_www.npr.org-91_www.entrepreneur.com-10_www.eventbrite.com-22_forums.macrumors.com-77_www.androidheadlines.com-84_www.glassdoor.com-85_www.pcworld.com-60_www.csmonitor.com	10	0.09187838356787381-0.11308163660667411-0.0-0.09311059326298916-0.0-0.0-0.10681335151024934-0.0-0.0-0.0-0.08732996136374464-0.09951921029190236-0.10392041731727789-0.10113251194955258-0.09816059986553194-0.10505333426420418-0.0-0.0-0.0-0.0-0.0
gpt2	ensemble	TF-IDF	fool	21.0906	10	15_www.dailymail.co.uk-78_www.wired.com-45_www.npr.org-91_www.entrepreneur.com-10_www.eventbrite.com-22_forums.macrumors.com-77_www.androidheadlines.com-84_www.glassdoor.com-85_www.pcworld.com-60_www.csmonitor.com	10	0.09187838356787381-0.11308163660667411-0.0-0.09311059326298916-0.0-0.0-0.10681335151024934-0.0-0.0-0.0-0.08732996136374464-0.09951921029190236-0.10392041731727789-0.10113251194955258-0.09816059986553194-0.10505333426420418-0.0-0.0-0.0-0.0-0.0
gpt2	average	TF-IDF	fool	21.1242	42	15_www.dailymail.co.uk-78_www.wired.com-45_www.npr.org-91_www.entrepreneur.com-100_www.ign.com-22_forums.macrumors.com-77_www.androidheadlines.com-84_www.glassdoor.com-85_www.pcworld.com-60_www.csmonitor.com	10	0.08985887550552855-0.10642174220876711-0.0-0.10047871668853918-0.0-0.0-0.11431792906433223-0.0-0.0-0.08780629587327435-0.0-0.09308737884771866-0.09818709292682187-0.09815976784238306-0.10759672129983609-0.1040854797427988-0.0-0.0-0.0-0.0-0.0
gpt2	ensemble	TF-IDF	fool	21.0495	42	15_www.dailymail.co.uk-78_www.wired.com-45_www.npr.org-91_www.entrepreneur.com-100_www.ign.com-22_forums.macrumors.com-77_www.androidheadlines.com-84_www.glassdoor.com-85_www.pcworld.com-60_www.csmonitor.com	10	0.08985887550552855-0.10642174220876711-0.0-0.10047871668853918-0.0-0.0-0.11431792906433223-0.0-0.0-0.08780629587327435-0.0-0.09308737884771866-0.09818709292682187-0.09815976784238306-0.10759672129983609-0.1040854797427988-0.0-0.0-0.0-0.0-0.0
gpt2	average	TF-IDF	fool	21.1262	88	15_www.dailymail.co.uk-78_www.wired.com-45_www.npr.org-91_www.entrepreneur.com-100_www.ign.com-22_forums.macrumors.com-77_www.androidheadlines.com-84_www.glassdoor.com-85_www.pcworld.com-60_www.csmonitor.com	10	0.08909972686162729-0.10797849746803495-0.0-0.09573511588426993-0.0-0.0-0.11682753353193912-0.0-0.0-0.0882671616533604-0.0-0.101019452660165-0.10064994845881818-0.09610347666396064-0.09760079339043032-0.106718293427394-0.0-0.0-0.0-0.0-0.0
gpt2	ensemble	TF-IDF	fool	21.0495	88	15_www.dailymail.co.uk-78_www.wired.com-45_www.npr.org-91_www.entrepreneur.com-100_www.ign.com-22_forums.macrumors.com-77_www.androidheadlines.com-84_www.glassdoor.com-85_www.pcworld.com-60_www.csmonitor.com	10	0.08909972686162729-0.10797849746803495-0.0-0.09573511588426993-0.0-0.0-0.11682753353193912-0.0-0.0-0.0882671616533604-0.0-0.101019452660165-0.10064994845881818-0.09610347666396064-0.09760079339043032-0.106718293427394-0.0-0.0-0.0-0.0-0.0
deberta	average	Sentence Sim	fool	6.29202	42	91_www.entrepreneur.com-77_www.androidheadlines.com-84_www.glassdoor.com	3	0.0-0.0-0.0-0.0-0.0-0.0-0.37712963609975647-0.0-0.0-0.0-0.0-0.0-0.3126031273586104-0.3102672365416331-0.0-0.0-0.0-0.0-0.0-0.0-0.0
deberta	average	Sentence Sim	fool	5.34456	88	91_www.entrepreneur.com-77_www.androidheadlines.com-85_www.pcworld.com	3	0.0-0.0-0.0-0.0-0.0-0.0-0.3611483831828298-0.0-0.0-0.0-0.0-0.0-0.31901074186677036-0.0-0.3198408749503997-0.0-0.0-0.0-0.0-0.0-0.0
deberta	average	Sentence Sim	fool	6.22594	5	91_www.entrepreneur.com-77_www.androidheadlines.com-84_www.glassdoor.com-85_www.pcworld.com	4	0.0-0.0-0.0-0.0-0.0-0.0-0.2581129902932888-0.0-0.0-0.0-0.0-0.0-0.2502609916218814-0.2584872219105558-0.23313879617427402-0.0-0.0-0.0-0.0-0.0-0.0
deberta	average	Sentence Sim	fool	6.25303	10	91_www.entrepreneur.com-77_www.androidheadlines.com-84_www.glassdoor.com-85_www.pcworld.com	4	0.0-0.0-0.0-0.0-0.0-0.0-0.2531053942890838-0.0-0.0-0.0-0.0-0.0-0.24632393517158266-0.26343018290024245-0.23714048763909107-0.0-0.0-0.0-0.0-0.0-0.0
deberta	average	Sentence Sim	fool	6.11654	42	91_www.entrepreneur.com-77_www.androidheadlines.com-84_www.glassdoor.com-85_www.pcworld.com	4	0.0-0.0-0.0-0.0-0.0-0.0-0.2904814750417415-0.0-0.0-0.0-0.0-0.0-0.24078038118905914-0.23898117755958745-0.22975696620961195-0.0-0.0-0.0-0.0-0.0-0.0
deberta	average	Sentence Sim	fool	6.16377	88	91_www.entrepreneur.com-77_www.androidheadlines.com-84_www.glassdoor.com-85_www.pcworld.com	4	0.0-0.0-0.0-0.0-0.0-0.0-0.27460478428075136-0.0-0.0-0.0-0.0-0.0-0.2425647740176061-0.23963446309620084-0.2431959786054415-0.0-0.0-0.0-0.0-0.0-0.0
deberta	average	Sentence Sim	fool	6.13732	5	78_www.wired.com-91_www.entrepreneur.com-77_www.androidheadlines.com-84_www.glassdoor.com-85_www.pcworld.com	5	0.0-0.15782800963019342-0.0-0.0-0.0-0.0-0.21737553077560162-0.0-0.0-0.0-0.0-0.0-0.21076279742612133-0.21769069816157466-0.196342964006509-0.0-0.0-0.0-0.0-0.0-0.0
deberta	average	Sentence Sim	fool	6.1663	10	78_www.wired.com-91_www.entrepreneur.com-77_www.androidheadlines.com-84_www.glassdoor.com-85_www.pcworld.com	5	0.0-0.15503883150611497-0.0-0.0-0.0-0.0-0.21386422971060978-0.0-0.0-0.0-0.0-0.0-0.2081341600905925-0.22258827515994672-0.20037450353273611-0.0-0.0-0.0-0.0-0.0-0.0
deberta	average	TF-IDF	fool	5.47477	5	78_www.wired.com-91_www.entrepreneur.com-77_www.androidheadlines.com-60_www.csmonitor.com	4	0.0-0.25889823341359886-0.0-0.0-0.0-0.0-0.2622997891794252-0.0-0.0-0.0-0.0-0.0-0.24347894681550647-0.0-0.0-0.23532303059146942-0.0-0.0-0.0-0.0-0.0
deberta	average	TF-IDF	fool	5.48345	10	78_www.wired.com-91_www.entrepreneur.com-77_www.androidheadlines.com-60_www.csmonitor.com	4	0.0-0.26367423442006244-0.0-0.0-0.0-0.0-0.2490583752627062-0.0-0.0-0.0-0.0-0.0-0.24231287500776605-0.0-0.0-0.24495451530946535-0.0-0.0-0.0-0.0-0.0
deberta	average	TF-IDF	fool	5.17496	42	78_www.wired.com-91_www.entrepreneur.com-85_www.pcworld.com-60_www.csmonitor.com	4	0.0-0.2461062888397628-0.0-0.0-0.0-0.0-0.26436666686661636-0.0-0.0-0.0-0.0-0.0-0.0-0.0-0.24882349434275144-0.2407035499508694-0.0-0.0-0.0-0.0-0.0
deberta	average	TF-IDF	fool	5.59042	88	78_www.wired.com-91_www.entrepreneur.com-22_forums.macrumors.com-60_www.csmonitor.com	4	0.0-0.2496359979909815-0.0-0.0-0.0-0.0-0.2700941262375321-0.0-0.0-0.0-0.0-0.23354734945064737-0.0-0.0-0.0-0.246722526320839-0.0-0.0-0.0-0.0-0.0
deberta	average	TF-IDF	fool	5.97547	5	78_www.wired.com-91_www.entrepreneur.com-77_www.androidheadlines.com-84_www.glassdoor.com-85_www.pcworld.com-60_www.csmonitor.com	6	0.0-0.17765251448990443-0.0-0.0-0.0-0.0-0.17998661668523036-0.0-0.0-0.0-0.0-0.0-0.16707200569432873-0.1557117789604654-0.15810155940210885-0.16147552476796223-0.0-0.0-0.0-0.0-0.0
deberta	average	TF-IDF	fool	6.3497	10	78_www.wired.com-91_www.entrepreneur.com-22_forums.macrumors.com-77_www.androidheadlines.com-84_www.glassdoor.com-60_www.csmonitor.com	6	0.0-0.17963139158052827-0.0-0.0-0.0-0.0-0.16967415353125323-0.0-0.0-0.0-0.0-0.15808733203879505-0.16507869656380708-0.16065007901079792-0.0-0.16687834727481846-0.0-0.0-0.0-0.0-0.0
deberta	average	TF-IDF	fool	5.35175	42	78_www.wired.com-45_www.npr.org-91_www.entrepreneur.com-77_www.androidheadlines.com-85_www.pcworld.com-60_www.csmonitor.com	6	0.0-0.16863226023224245-0.0-0.15921514484497554-0.0-0.0-0.18114428840462446-0.0-0.0-0.0-0.0-0.0-0.15558391605168795-0.0-0.17049409199462706-0.1649302984718426-0.0-0.0-0.0-0.0-0.0
deberta	average	TF-IDF	fool	5.69923	88	78_www.wired.com-91_www.entrepreneur.com-22_forums.macrumors.com-77_www.androidheadlines.com-85_www.pcworld.com-60_www.csmonitor.com	6	0.0-0.17117856009598048-0.0-0.0-0.0-0.0-0.18520695729705225-0.0-0.0-0.0-0.0-0.16014637037499246-0.15956059451573223-0.0-0.15472676198096755-0.1691807557352751-0.0-0.0-0.0-0.0-0.0
deberta	average	Sentence Sim	fool	6.03564	42	78_www.wired.com-91_www.entrepreneur.com-77_www.androidheadlines.com-84_www.glassdoor.com-85_www.pcworld.com	5	0.0-0.1576432566310164-0.0-0.0-0.0-0.0-0.24468902932518002-0.0-0.0-0.0-0.0-0.0-0.2028229777655583-0.20130740645557887-0.1935373298226663-0.0-0.0-0.0-0.0-0.0-0.0
deberta	average	Sentence Sim	fool	6.06788	88	78_www.wired.com-91_www.entrepreneur.com-77_www.androidheadlines.com-84_www.glassdoor.com-85_www.pcworld.com	5	0.0-0.16366525081783798-0.0-0.0-0.0-0.0-0.22966152338566395-0.0-0.0-0.0-0.0-0.0-0.20286534943844242-0.20041462858896322-0.2033932477690924-0.0-0.0-0.0-0.0-0.0-0.0
deberta	average	Sentence Sim	fool	6.14903	5	78_www.wired.com-91_www.entrepreneur.com-77_www.androidheadlines.com-84_www.glassdoor.com-85_www.pcworld.com-58_medium.com	6	0.0-0.1372281578088219-0.0-0.0-0.0-0.0-0.18900348367153214-0.0-0.0-0.0-0.0-0.0-0.18325385014478116-0.18927751513071256-0.17071610617449332-0.0-0.0-0.0-0.0-0.0-0.13052088706965892
deberta	average	Sentence Sim	fool	6.17493	10	78_www.wired.com-91_www.entrepreneur.com-77_www.androidheadlines.com-84_www.glassdoor.com-85_www.pcworld.com-58_medium.com	6	0.0-0.13637183592328556-0.0-0.0-0.0-0.0-0.18811453466614145-0.0-0.0-0.0-0.0-0.0-0.18307437726519263-0.19578818702179238-0.17624899938631394-0.0-0.0-0.0-0.0-0.0-0.12040206573727409
deberta	average	TF-IDF	fool	5.88398	5	78_www.wired.com-45_www.npr.org-91_www.entrepreneur.com-77_www.androidheadlines.com-84_www.glassdoor.com-85_www.pcworld.com-60_www.csmonitor.com	7	0.0-0.15402033528602058-0.0-0.13302473804966508-0.0-0.0-0.1560439441482321-0.0-0.0-0.0-0.0-0.0-0.14484729590140852-0.13499826035300214-0.13707014087739977-0.13999528538427186-0.0-0.0-0.0-0.0-0.0
deberta	average	TF-IDF	fool	6.14013	10	78_www.wired.com-91_www.entrepreneur.com-22_forums.macrumors.com-77_www.androidheadlines.com-84_www.glassdoor.com-85_www.pcworld.com-60_www.csmonitor.com	7	0.0-0.1553999994532167-0.0-0.0-0.0-0.0-0.14678594389311592-0.0-0.0-0.0-0.0-0.1367621276895582-0.14281039149136174-0.13897917268678212-0.13489508662214375-0.14436727816382167-0.0-0.0-0.0-0.0-0.0
deberta	average	TF-IDF	fool	5.86635	42	78_www.wired.com-45_www.npr.org-91_www.entrepreneur.com-77_www.androidheadlines.com-84_www.glassdoor.com-85_www.pcworld.com-60_www.csmonitor.com	7	0.0-0.14593365015102108-0.0-0.13778411802434173-0.0-0.0-0.1567615068106746-0.0-0.0-0.0-0.0-0.0-0.13464166786914525-0.13460419761889303-0.1475448715429285-0.14272998798299566-0.0-0.0-0.0-0.0-0.0
deberta	average	TF-IDF	fool	6.11651	88	78_www.wired.com-91_www.entrepreneur.com-22_forums.macrumors.com-77_www.androidheadlines.com-84_www.glassdoor.com-85_www.pcworld.com-60_www.csmonitor.com	7	0.0-0.14854697374532794-0.0-0.0-0.0-0.0-0.16072067090429576-0.0-0.0-0.0-0.0-0.13897335426916105-0.13846502407210023-0.13221040262263523-0.1342702744829672-0.1468132999035127-0.0-0.0-0.0-0.0-0.0
deberta	average	TF-IDF	fool	5.98237	5	78_www.wired.com-45_www.npr.org-91_www.entrepreneur.com-22_forums.macrumors.com-77_www.androidheadlines.com-84_www.glassdoor.com-85_www.pcworld.com-60_www.csmonitor.com	8	0.0-0.13668329727776224-0.0-0.11805103386104046-0.0-0.0-0.1384791220380053-0.0-0.0-0.0-0.0-0.11256330520293241-0.12854280552503877-0.1198024099710222-0.12164107277560804-0.12423695334859042-0.0-0.0-0.0-0.0-0.0
deberta	ensemble	TF-IDF	fool	4.21016	5	15_www.dailymail.co.uk-78_www.wired.com-45_www.npr.org-91_www.entrepreneur.com-22_forums.macrumors.com-77_www.androidheadlines.com-84_www.glassdoor.com-85_www.pcworld.com-60_www.csmonitor.com	9	0.10100504946283878-0.12287759407547798-0.0-0.10612728334676681-0.0-0.0-0.12449203146698609-0.0-0.0-0.0-0.0-0.1011938429932096-0.11555933309489018-0.10770176162613183-0.10935471020319498-0.11168839373050367-0.0-0.0-0.0-0.0-0.0
deberta	average	TF-IDF	fool	6.02476	10	78_www.wired.com-45_www.npr.org-91_www.entrepreneur.com-22_forums.macrumors.com-77_www.androidheadlines.com-84_www.glassdoor.com-85_www.pcworld.com-60_www.csmonitor.com	8	0.0-0.13777142580385165-0.0-0.11343998527279371-0.0-0.0-0.13013454857962775-0.0-0.0-0.0-0.0-0.12124783393857881-0.12660998278377977-0.12321337738396851-0.11959258998235554-0.12799025625504443-0.0-0.0-0.0-0.0-0.0
deberta	average	TF-IDF	fool	5.96495	42	78_www.wired.com-45_www.npr.org-91_www.entrepreneur.com-22_forums.macrumors.com-77_www.androidheadlines.com-84_www.glassdoor.com-85_www.pcworld.com-60_www.csmonitor.com	8	0.0-0.1294141248853629-0.0-0.12218711064082148-0.0-0.0-0.13901628033438432-0.0-0.0-0.0-0.0-0.11319887667143759-0.11940038231318922-0.11936715365317414-0.13084295782563746-0.12657311367599278-0.0-0.0-0.0-0.0-0.0
deberta	average	TF-IDF	fool	6.00272	88	78_www.wired.com-45_www.npr.org-91_www.entrepreneur.com-22_forums.macrumors.com-77_www.androidheadlines.com-84_www.glassdoor.com-85_www.pcworld.com-60_www.csmonitor.com	8	0.0-0.13125960523654687-0.0-0.11637644357816998-0.0-0.0-0.14201657081495636-0.0-0.0-0.0-0.0-0.122800129547187-0.12235095701062351-0.11682422616137497-0.11864437746037475-0.12972769019076658-0.0-0.0-0.0-0.0-0.0
deberta	ensemble	Entropy	fool	3.9861	10	15_www.dailymail.co.uk-45_www.npr.org-journals.plos.org	3	0.33329300750060487-0.0-0.0-0.33776917493346237-0.0-0.0-0.0-0.0-0.0-0.0-0.0-0.0-0.0-0.0-0.0-0.0-0.0-0.0-0.3289378175659327-0.0-0.0
deberta	ensemble	Entropy	fool	3.97056	42	15_www.dailymail.co.uk-45_www.npr.org-journals.plos.org	3	0.3333333333333333-0.0-0.0-0.3381747760832728-0.0-0.0-0.0-0.0-0.0-0.0-0.0-0.0-0.0-0.0-0.0-0.0-0.0-0.0-0.32849189058339384-0.0-0.0
deberta	ensemble	Entropy	fool	3.97444	88	15_www.dailymail.co.uk-45_www.npr.org-journals.plos.org	3	0.3333333333333333-0.0-0.0-0.337929366231253-0.0-0.0-0.0-0.0-0.0-0.0-0.0-0.0-0.0-0.0-0.0-0.0-0.0-0.0-0.32873730043541366-0.0-0.0
deberta	average	Sentence Sim	fool	6.05694	42	78_www.wired.com-91_www.entrepreneur.com-77_www.androidheadlines.com-84_www.glassdoor.com-85_www.pcworld.com-58_medium.com	6	0.0-0.13710870829197816-0.0-0.0-0.0-0.0-0.21281593301842902-0.0-0.0-0.0-0.0-0.0-0.1764033367977055-0.17508518320790725-0.16832723368798647-0.0-0.0-0.0-0.0-0.0-0.13025960499599346
deberta	average	Sentence Sim	fool	6.08818	88	78_www.wired.com-91_www.entrepreneur.com-77_www.androidheadlines.com-84_www.glassdoor.com-85_www.pcworld.com-58_medium.com	6	0.0-0.14414309176640522-0.0-0.0-0.0-0.0-0.20226726122478855-0.0-0.0-0.0-0.0-0.0-0.17866736240104916-0.17650896604913507-0.1791322924771525-0.0-0.0-0.0-0.0-0.0-0.11928102608146944
deberta	average	Sentence Sim	fool	6.14539	5	78_www.wired.com-45_www.npr.org-91_www.entrepreneur.com-77_www.androidheadlines.com-84_www.glassdoor.com-85_www.pcworld.com-58_medium.com	7	0.0-0.12184225797068027-0.0-0.11211911668723525-0.0-0.0-0.16781258003146968-0.0-0.0-0.0-0.0-0.0-0.16270759033701332-0.16805588732550228-0.15157556714592488-0.0-0.0-0.0-0.0-0.0-0.11588700050217438
deberta	average	Sentence Sim	fool	6.17764	10	78_www.wired.com-45_www.npr.org-91_www.entrepreneur.com-77_www.androidheadlines.com-84_www.glassdoor.com-85_www.pcworld.com-58_medium.com	7	0.0-0.12318792660175236-0.0-0.096676188541963-0.0-0.0-0.1699283384452739-0.0-0.0-0.0-0.0-0.0-0.1653754442515004-0.17686013133898446-0.15920991789131034-0.0-0.0-0.0-0.0-0.0-0.10876205292921555
deberta	average	Sentence Sim	fool	6.28992	42	78_www.wired.com-91_www.entrepreneur.com-70_www.insiderpages.com-77_www.androidheadlines.com-84_www.glassdoor.com-85_www.pcworld.com-58_medium.com	7	0.0-0.12376296284303523-0.0-0.0-0.0-0.0-0.1921010761364361-0.0-0.09733696433433436-0.0-0.0-0.0-0.15923277149536966-0.15804292297452877-0.15194277174600176-0.0-0.0-0.0-0.0-0.0-0.11758053047029396
deberta	average	Sentence Sim	fool	6.33057	88	78_www.wired.com-91_www.entrepreneur.com-70_www.insiderpages.com-77_www.androidheadlines.com-84_www.glassdoor.com-85_www.pcworld.com-58_medium.com	7	0.0-0.1296528723221552-0.0-0.0-0.0-0.0-0.181934014826242-0.0-0.1005266313264079-0.0-0.0-0.0-0.16070653433089718-0.15876511429330822-0.16112472655264753-0.0-0.0-0.0-0.0-0.0-0.10729010634834191
deberta	average	Sentence Sim	fool	6.10297	5	78_www.wired.com-45_www.npr.org-91_www.entrepreneur.com-77_www.androidheadlines.com-84_www.glassdoor.com-85_www.pcworld.com-60_www.csmonitor.com-58_medium.com	8	0.0-0.11109486105134471-0.0-0.10222937342941595-0.0-0.0-0.1530102574572281-0.0-0.0-0.0-0.0-0.0-0.1483555659715315-0.15323210323121098-0.13820547034598984-0.08820746675526786-0.0-0.0-0.0-0.0-0.10566490175801112
deberta	average	Sentence Sim	fool	6.37242	10	78_www.wired.com-45_www.npr.org-91_www.entrepreneur.com-70_www.insiderpages.com-77_www.androidheadlines.com-84_www.glassdoor.com-85_www.pcworld.com-58_medium.com	8	0.0-0.11249110904241376-0.0-0.08828147341286781-0.0-0.0-0.1551728954026537-0.0-0.0868333273756589-0.0-0.0-0.0-0.15101534416091486-0.1615027776547244-0.14538519096960242-0.0-0.0-0.0-0.0-0.0-0.09931788198116424
deberta	average	Sentence Sim	fool	6.19785	42	78_www.wired.com-91_www.entrepreneur.com-70_www.insiderpages.com-10_www.eventbrite.com-77_www.androidheadlines.com-84_www.glassdoor.com-85_www.pcworld.com-58_medium.com	8	0.0-0.11279498005470828-0.0-0.0-0.0-0.0-0.17507690954989671-0.0-0.08871087681216536-0.0-0.08862088088693641-0.0-0.14512142301938177-0.14403701992257983-0.1384774694694684-0.0-0.0-0.0-0.0-0.0-0.10716044028486325
deberta	ensemble	Sentence Sim	fool	4.39072	5	78_www.wired.com-45_www.npr.org-91_www.entrepreneur.com-70_www.insiderpages.com-22_forums.macrumors.com-77_www.androidheadlines.com-84_www.glassdoor.com-85_www.pcworld.com-60_www.csmonitor.com-58_medium.com	10	0.0-0.09858772485710737-0.0-0.09417471173171658-0.0-0.0-0.1373119982924739-0.0-0.07451522517354912-0.0-0.0-0.0641799428816334-0.1176567208782304-0.127548035824613-0.12299116853111883-0.07622988358101418-0.0-0.0-0.0-0.0-0.08680458824854326
deberta	average	Sentence Sim	fool	6.32561	88	78_www.wired.com-91_www.entrepreneur.com-70_www.insiderpages.com-77_www.androidheadlines.com-84_www.glassdoor.com-85_www.pcworld.com-60_www.csmonitor.com-58_medium.com	8	0.0-0.11806692082211731-0.0-0.0-0.0-0.0-0.16567615154692752-0.0-0.09154343909819432-0.0-0.0-0.0-0.14634558667776307-0.14457765449272872-0.1467264086915719-0.08936131759001592-0.0-0.0-0.0-0.0-0.09770252108068114
deberta	ensemble	Sentence Sim	fool	4.39072	10	78_www.wired.com-45_www.npr.org-91_www.entrepreneur.com-70_www.insiderpages.com-22_forums.macrumors.com-77_www.androidheadlines.com-84_www.glassdoor.com-85_www.pcworld.com-60_www.csmonitor.com-58_medium.com	10	0.0-0.09671515414346386-0.0-0.07671270168269544-0.0-0.0-0.13532984163412093-0.0-0.06883556607249375-0.0-0.0-0.07057052200419277-0.1343060228171829-0.1287162429207196-0.11877433579774156-0.08333209574244088-0.0-0.0-0.0-0.0-0.08670751718494832
deberta	average	Sentence Sim	fool	6.14897	5	78_www.wired.com-45_www.npr.org-91_www.entrepreneur.com-22_forums.macrumors.com-77_www.androidheadlines.com-84_www.glassdoor.com-85_www.pcworld.com-60_www.csmonitor.com-58_medium.com	9	0.0-0.10307877069225267-0.0-0.09485297557438985-0.0-0.0-0.14196974632973133-0.0-0.0-0.0-0.0-0.07215536599291708-0.13765091581176928-0.1421755847406985-0.1282332040509517-0.08184282470823344-0.0-0.0-0.0-0.0-0.0980406120990562
deberta	ensemble	Sentence Sim	fool	4.41221	42	78_www.wired.com-45_www.npr.org-91_www.entrepreneur.com-70_www.insiderpages.com-10_www.eventbrite.com-77_www.androidheadlines.com-84_www.glassdoor.com-85_www.pcworld.com-60_www.csmonitor.com-58_medium.com	10	0.0-0.1057476276634935-0.0-0.08922898625182249-0.0-0.0-0.12878637294554635-0.0-0.07517810779780781-0.0-0.06795974485902852-0.0-0.1258289225155159-0.12695862947075848-0.12604085895221592-0.06942635463753687-0.0-0.0-0.0-0.0-0.08484439490627423
deberta	average	Sentence Sim	fool	6.33289	10	78_www.wired.com-45_www.npr.org-91_www.entrepreneur.com-70_www.insiderpages.com-77_www.androidheadlines.com-84_www.glassdoor.com-85_www.pcworld.com-60_www.csmonitor.com-58_medium.com	9	0.0-0.10375186158011368-0.0-0.08142303234086606-0.0-0.0-0.14311777083406138-0.0-0.08008739036454204-0.0-0.0-0.0-0.13928321284439413-0.1489558950451725-0.1340904569052591-0.077688339431386-0.0-0.0-0.0-0.0-0.09160204065420523
deberta	ensemble	Sentence Sim	fool	4.42083	88	78_www.wired.com-45_www.npr.org-91_www.entrepreneur.com-70_www.insiderpages.com-10_www.eventbrite.com-77_www.androidheadlines.com-84_www.glassdoor.com-85_www.pcworld.com-60_www.csmonitor.com-58_medium.com	10	0.0-0.09649006640582276-0.0-0.0892892272286916-0.0-0.0-0.12507644417241523-0.0-0.07506836285475271-0.0-0.0741291266934746-0.0-0.12610391011784322-0.12671186594705802-0.118381115787086-0.0756806041623187-0.0-0.0-0.0-0.0-0.09306927663053714
deberta	average	TF-IDF	fool	5.96367	5	15_www.dailymail.co.uk-78_www.wired.com-45_www.npr.org-91_www.entrepreneur.com-22_forums.macrumors.com-77_www.androidheadlines.com-84_www.glassdoor.com-85_www.pcworld.com-60_www.csmonitor.com	9	0.10100504946283878-0.12287759407547798-0.0-0.10612728334676681-0.0-0.0-0.12449203146698609-0.0-0.0-0.0-0.0-0.1011938429932096-0.11555933309489018-0.10770176162613183-0.10935471020319498-0.11168839373050367-0.0-0.0-0.0-0.0-0.0
deberta	ensemble	TF-IDF	fool	4.25147	5	15_www.dailymail.co.uk-78_www.wired.com-45_www.npr.org-91_www.entrepreneur.com-10_www.eventbrite.com-22_forums.macrumors.com-77_www.androidheadlines.com-84_www.glassdoor.com-85_www.pcworld.com-60_www.csmonitor.com	10	0.09243364051719767-0.11245005491106314-0.0-0.09712119552548673-0.0-0.0-0.11392748922031604-0.0-0.0-0.0-0.08486119249706091-0.0926064128034455-0.10575283028429273-0.0985620617005041-0.10007473909018136-0.10221038345045187-0.0-0.0-0.0-0.0-0.0
deberta	average	TF-IDF	fool	6.00223	10	15_www.dailymail.co.uk-78_www.wired.com-45_www.npr.org-91_www.entrepreneur.com-22_forums.macrumors.com-77_www.androidheadlines.com-84_www.glassdoor.com-85_www.pcworld.com-60_www.csmonitor.com	9	0.10066988032735448-0.12390199285564892-0.0-0.1020199955310447-0.0-0.0-0.11703391914766231-0.0-0.0-0.0-0.0-0.10904182900603111-0.11386417096868826-0.11080950142799523-0.10755321826079343-0.11510549247478168-0.0-0.0-0.0-0.0-0.0
deberta	ensemble	TF-IDF	fool	4.21016	10	15_www.dailymail.co.uk-78_www.wired.com-45_www.npr.org-91_www.entrepreneur.com-22_forums.macrumors.com-77_www.androidheadlines.com-84_www.glassdoor.com-85_www.pcworld.com-60_www.csmonitor.com	9	0.10223388050212931-0.11643415326326874-0.0-0.11108816875984556-0.0-0.0-0.11611179028229747-0.0-0.0-0.0-0.0-0.10819246901623475-0.11134792041541235-0.10740632756248239-0.10923112322109796-0.1179541669772315-0.0-0.0-0.0-0.0-0.0
deberta	average	TF-IDF	fool	5.9496	42	15_www.dailymail.co.uk-78_www.wired.com-45_www.npr.org-91_www.entrepreneur.com-22_forums.macrumors.com-77_www.androidheadlines.com-84_www.glassdoor.com-85_www.pcworld.com-60_www.csmonitor.com	9	0.09850854604565983-0.11666572760513438-0.0-0.11015063602607399-0.0-0.0-0.12532198868196828-0.0-0.0-0.0-0.0-0.10204781991653232-0.10763842425422104-0.10760846890119109-0.11795380828992032-0.11410458027929869-0.0-0.0-0.0-0.0-0.0
deberta	ensemble	TF-IDF	fool	4.25147	42	78_www.wired.com-45_www.npr.org-91_www.entrepreneur.com-22_forums.macrumors.com-77_www.androidheadlines.com-84_www.glassdoor.com-85_www.pcworld.com-60_www.csmonitor.com-58_medium.com	9	0.0-0.11929511643153747-0.0-0.11071659180350929-0.0-0.0-0.12624015365336202-0.0-0.0-0.0-0.0-0.1010992261748078-0.10908479204260399-0.10478691427656048-0.11453476739180342-0.11124593856438958-0.0-0.0-0.0-0.0-0.10299649966142586
deberta	average	TF-IDF	fool	5.98856	88	15_www.dailymail.co.uk-78_www.wired.com-45_www.npr.org-91_www.entrepreneur.com-22_forums.macrumors.com-77_www.androidheadlines.com-84_www.glassdoor.com-85_www.pcworld.com-60_www.csmonitor.com	9	0.09772569673283141-0.11843216886192892-0.0-0.10500347454620428-0.0-0.0-0.12813790248445725-0.0-0.0-0.0-0.0-0.11079940132830618-0.11039412449083162-0.10540749726448072-0.10704977300962658-0.117049961281333-0.0-0.0-0.0-0.0-0.0
deberta	ensemble	TF-IDF	fool	4.25979	88	78_www.wired.com-45_www.npr.org-91_www.entrepreneur.com-22_forums.macrumors.com-77_www.androidheadlines.com-84_www.glassdoor.com-85_www.pcworld.com-60_www.csmonitor.com-58_medium.com	9	0.0-0.1179098888379619-0.0-0.10810886899359057-0.0-0.0-0.11833238847886067-0.0-0.0-0.0-0.0-0.10696171017814803-0.11344882179153438-0.10851880703030621-0.10420607314184853-0.12118896039374535-0.0-0.0-0.0-0.0-0.10132448115400447
deberta	average	TF-IDF	fool	5.94842	5	15_www.dailymail.co.uk-78_www.wired.com-45_www.npr.org-91_www.entrepreneur.com-10_www.eventbrite.com-22_forums.macrumors.com-77_www.androidheadlines.com-84_www.glassdoor.com-85_www.pcworld.com-60_www.csmonitor.com	10	0.09243364051719767-0.11245005491106314-0.0-0.09712119552548673-0.0-0.0-0.11392748922031604-0.0-0.0-0.0-0.08486119249706091-0.0926064128034455-0.10575283028429273-0.0985620617005041-0.10007473909018136-0.10221038345045187-0.0-0.0-0.0-0.0-0.0
deberta	average	TF-IDF	fool	5.9823	10	15_www.dailymail.co.uk-78_www.wired.com-45_www.npr.org-91_www.entrepreneur.com-10_www.eventbrite.com-22_forums.macrumors.com-77_www.androidheadlines.com-84_www.glassdoor.com-85_www.pcworld.com-60_www.csmonitor.com	10	0.09187838356787381-0.11308163660667411-0.0-0.09311059326298916-0.0-0.0-0.10681335151024934-0.0-0.0-0.0-0.08732996136374464-0.09951921029190236-0.10392041731727789-0.10113251194955258-0.09816059986553194-0.10505333426420418-0.0-0.0-0.0-0.0-0.0
deberta	ensemble	TF-IDF	fool	4.26811	10	15_www.dailymail.co.uk-78_www.wired.com-45_www.npr.org-91_www.entrepreneur.com-10_www.eventbrite.com-22_forums.macrumors.com-77_www.androidheadlines.com-84_www.glassdoor.com-85_www.pcworld.com-60_www.csmonitor.com	10	0.09187838356787381-0.11308163660667411-0.0-0.09311059326298916-0.0-0.0-0.10681335151024934-0.0-0.0-0.0-0.08732996136374464-0.09951921029190236-0.10392041731727789-0.10113251194955258-0.09816059986553194-0.10505333426420418-0.0-0.0-0.0-0.0-0.0
deberta	average	TF-IDF	fool	6.01517	42	15_www.dailymail.co.uk-78_www.wired.com-45_www.npr.org-91_www.entrepreneur.com-100_www.ign.com-22_forums.macrumors.com-77_www.androidheadlines.com-84_www.glassdoor.com-85_www.pcworld.com-60_www.csmonitor.com	10	0.08985887550552855-0.10642174220876711-0.0-0.10047871668853918-0.0-0.0-0.11431792906433223-0.0-0.0-0.08780629587327435-0.0-0.09308737884771866-0.09818709292682187-0.09815976784238306-0.10759672129983609-0.1040854797427988-0.0-0.0-0.0-0.0-0.0
deberta	ensemble	TF-IDF	fool	4.20605	42	15_www.dailymail.co.uk-78_www.wired.com-45_www.npr.org-91_www.entrepreneur.com-22_forums.macrumors.com-77_www.androidheadlines.com-84_www.glassdoor.com-85_www.pcworld.com-60_www.csmonitor.com-58_medium.com	10	0.09076798004642007-0.1084669396836443-0.0-0.10066707040788073-0.0-0.0-0.11478158990549665-0.0-0.0-0.0-0.0-0.09192265363066433-0.09918338581511303-0.0952756177323797-0.10413867791056283-0.10114836943253179-0.0-0.0-0.0-0.0-0.09364771543530645
deberta	average	TF-IDF	fool	6.05452	88	15_www.dailymail.co.uk-78_www.wired.com-45_www.npr.org-91_www.entrepreneur.com-100_www.ign.com-22_forums.macrumors.com-77_www.androidheadlines.com-84_www.glassdoor.com-85_www.pcworld.com-60_www.csmonitor.com	10	0.08909972686162729-0.10797849746803495-0.0-0.09573511588426993-0.0-0.0-0.11682753353193912-0.0-0.0-0.0882671616533604-0.0-0.101019452660165-0.10064994845881818-0.09610347666396064-0.09760079339043032-0.106718293427394-0.0-0.0-0.0-0.0-0.0
deberta	ensemble	TF-IDF	fool	4.21427	88	15_www.dailymail.co.uk-78_www.wired.com-45_www.npr.org-91_www.entrepreneur.com-22_forums.macrumors.com-77_www.androidheadlines.com-84_www.glassdoor.com-85_www.pcworld.com-60_www.csmonitor.com-58_medium.com	10	0.08972540986094725-0.10733037573531702-0.0-0.09840875641353719-0.0-0.0-0.10771496642277005-0.0-0.0-0.0-0.0-0.09736452689298583-0.10326957975804738-0.09878191259189092-0.09485614051919632-0.11031523125179443-0.0-0.0-0.0-0.0-0.09223310055351358
gpt2	ensemble	Prior	fool	21.3392	5		21	0.051081717354975506-0.050732338188665134-0.04814674107230597-0.04329050917842101-0.04376490711047616-0.044741288327288485-0.04085811133749198-0.0502321736935585-0.05543447282682544-0.03896245387994074-0.04808511979311374-0.057971832609602245-0.034475096704134914-0.045572794415796314-0.03433679605926678-0.04979648028319766-0.040987451969258584-0.05388804644536814-0.06116248711780517-0.05650496989…
gpt2	average	Prior	fool	21.3649	5		21	0.051081717354975506-0.050732338188665134-0.04814674107230597-0.04329050917842101-0.04376490711047616-0.044741288327288485-0.04085811133749198-0.0502321736935585-0.05543447282682544-0.03896245387994074-0.04808511979311374-0.057971832609602245-0.034475096704134914-0.045572794415796314-0.03433679605926678-0.04979648028319766-0.040987451969258584-0.05388804644536814-0.06116248711780517-0.05650496989…
deberta	ensemble	Prior	fool	4.71044	5	www.frontiersin.org	1	0.0-0.0-0.0-0.0-0.0-0.0-0.0-0.0-0.0-0.0-0.0-0.0-0.0-0.0-0.0-0.0-0.0-0.0-0.0-1.0-0.0
deberta	ensemble	Sentence Sim	fool	4.86008	10	91_www.entrepreneur.com-77_www.androidheadlines.com-84_www.glassdoor.com	3	0.0-0.0-0.0-0.0-0.0-0.0-0.33972417650030295-0.0-0.0-0.0-0.0-0.0-0.33715404119038256-0.32312178230931443-0.0-0.0-0.0-0.0-0.0-0.0-0.0
deberta	ensemble	Prior	fool	4.04492	5	45_www.npr.org-60_www.csmonitor.com	2	0.0-0.0-0.0-0.5004265235670492-0.0-0.0-0.0-0.0-0.0-0.0-0.0-0.0-0.0-0.0-0.0-0.4995734764329508-0.0-0.0-0.0-0.0-0.0
deberta	ensemble	Prior	fool	4.01344	5	15_www.dailymail.co.uk-45_www.npr.org-60_www.csmonitor.com	3	0.3330523465835493-0.0-0.0-0.33375829560039555-0.0-0.0-0.0-0.0-0.0-0.0-0.0-0.0-0.0-0.0-0.0-0.333189357816055-0.0-0.0-0.0-0.0-0.0
deberta	ensemble	Prior	fool	4.07266	5	15_www.dailymail.co.uk-78_www.wired.com-17_www.express.co.uk-45_www.npr.org-91_www.entrepreneur.com-11_link.springer.com-85_www.pcworld.com-60_www.csmonitor.com-journals.plos.org	9	0.11145542796551838-0.11142128419808323-0.11043584347368088-0.11169167265978808-0.0-0.0-0.11080279635636625-0.11079696988983809-0.0-0.0-0.0-0.0-0.0-0.0-0.11071327758161519-0.11150127855240556-0.0-0.0-0.11118144932270424-0.0-0.0
deberta	ensemble	Prior	fool	4.08461	5	15_www.dailymail.co.uk-78_www.wired.com-17_www.express.co.uk-45_www.npr.org-37_www.instructables.com-91_www.entrepreneur.com-11_link.springer.com-85_www.pcworld.com-60_www.csmonitor.com-journals.plos.org	10	0.10039734635474966-0.10036659017079687-0.09947892022482971-0.10061015196527949-0.0-0.09921528105557893-0.0998094657741253-0.09980421738211129-0.0-0.0-0.0-0.0-0.0-0.0-0.09972882862977092-0.10043864786277225-0.0-0.0-0.10015055057998554-0.0-0.0
deberta	average	Prior	fool	4.68866	5	www.frontiersin.org	1	0.0-0.0-0.0-0.0-0.0-0.0-0.0-0.0-0.0-0.0-0.0-0.0-0.0-0.0-0.0-0.0-0.0-0.0-0.0-1.0-0.0
deberta	ensemble	Prior	fool	4.03702	10	45_www.npr.org-60_www.csmonitor.com	2	0.0-0.0-0.0-0.5004265235670492-0.0-0.0-0.0-0.0-0.0-0.0-0.0-0.0-0.0-0.0-0.0-0.4995734764329508-0.0-0.0-0.0-0.0-0.0
deberta	ensemble	Prior	fool	4.00561	10	15_www.dailymail.co.uk-45_www.npr.org-60_www.csmonitor.com	3	0.3330523465835493-0.0-0.0-0.33375829560039555-0.0-0.0-0.0-0.0-0.0-0.0-0.0-0.0-0.0-0.0-0.0-0.333189357816055-0.0-0.0-0.0-0.0-0.0
deberta	ensemble	Prior	fool	4.06075	10	15_www.dailymail.co.uk-78_www.wired.com-17_www.express.co.uk-45_www.npr.org-91_www.entrepreneur.com-11_link.springer.com-85_www.pcworld.com-60_www.csmonitor.com-journals.plos.org	9	0.11145542796551838-0.11142128419808323-0.11043584347368088-0.11169167265978808-0.0-0.0-0.11080279635636625-0.11079696988983809-0.0-0.0-0.0-0.0-0.0-0.0-0.11071327758161519-0.11150127855240556-0.0-0.0-0.11118144932270424-0.0-0.0
deberta	ensemble	Prior	fool	4.07664	10	15_www.dailymail.co.uk-78_www.wired.com-17_www.express.co.uk-45_www.npr.org-37_www.instructables.com-91_www.entrepreneur.com-11_link.springer.com-85_www.pcworld.com-60_www.csmonitor.com-journals.plos.org	10	0.10039734635474966-0.10036659017079687-0.09947892022482971-0.10061015196527949-0.0-0.09921528105557893-0.0998094657741253-0.09980421738211129-0.0-0.0-0.0-0.0-0.0-0.0-0.09972882862977092-0.10043864786277225-0.0-0.0-0.10015055057998554-0.0-0.0
deberta	ensemble	Prior	fool	4.69124	10	www.frontiersin.org	1	0.0-0.0-0.0-0.0-0.0-0.0-0.0-0.0-0.0-0.0-0.0-0.0-0.0-0.0-0.0-0.0-0.0-0.0-0.0-1.0-0.0
deberta	ensemble	Prior	fool	4.03308	42	45_www.npr.org-60_www.csmonitor.com	2	0.0-0.0-0.0-0.5004265235670492-0.0-0.0-0.0-0.0-0.0-0.0-0.0-0.0-0.0-0.0-0.0-0.4995734764329508-0.0-0.0-0.0-0.0-0.0
deberta	ensemble	Prior	fool	3.99779	42	15_www.dailymail.co.uk-45_www.npr.org-60_www.csmonitor.com	3	0.3330523465835493-0.0-0.0-0.33375829560039555-0.0-0.0-0.0-0.0-0.0-0.0-0.0-0.0-0.0-0.0-0.0-0.333189357816055-0.0-0.0-0.0-0.0-0.0
deberta	average	Sentence Sim	fool	6.2183	42	78_www.wired.com-91_www.entrepreneur.com-70_www.insiderpages.com-10_www.eventbrite.com-77_www.androidheadlines.com-84_www.glassdoor.com-85_www.pcworld.com-60_www.csmonitor.com-58_medium.com	9	0.0-0.10370443175834099-0.0-0.0-0.0-0.0-0.16096683921635768-0.0-0.08156135198683234-0.0-0.08147860915304748-0.0-0.1334255718019306-0.1324285646044801-0.12731707808006112-0.08059355382622677-0.0-0.0-0.0-0.0-0.09852399957272298
deberta	average	Sentence Sim	fool	6.2811	88	78_www.wired.com-45_www.npr.org-91_www.entrepreneur.com-70_www.insiderpages.com-77_www.androidheadlines.com-84_www.glassdoor.com-85_www.pcworld.com-60_www.csmonitor.com-58_medium.com	9	0.0-0.10897005230847802-0.0-0.07704840992122479-0.0-0.0-0.1529110675083689-0.0-0.08449016267695796-0.0-0.0-0.0-0.13506989192525265-0.13343817610392375-0.1354213722084345-0.08247617016123962-0.0-0.0-0.0-0.0-0.09017469718611971
deberta	ensemble	Sentence Sim	fool	4.72899	42	91_www.entrepreneur.com-84_www.glassdoor.com-85_www.pcworld.com	3	0.0-0.0-0.0-0.0-0.0-0.0-0.33732619768555194-0.0-0.0-0.0-0.0-0.0-0.0-0.33253884524605537-0.3301349570683927-0.0-0.0-0.0-0.0-0.0-0.0
deberta	ensemble	Prior	fool	4.05678	42	15_www.dailymail.co.uk-78_www.wired.com-17_www.express.co.uk-45_www.npr.org-91_www.entrepreneur.com-11_link.springer.com-85_www.pcworld.com-60_www.csmonitor.com-journals.plos.org	9	0.11145542796551838-0.11142128419808323-0.11043584347368088-0.11169167265978808-0.0-0.0-0.11080279635636625-0.11079696988983809-0.0-0.0-0.0-0.0-0.0-0.0-0.11071327758161519-0.11150127855240556-0.0-0.0-0.11118144932270424-0.0-0.0
deberta	ensemble	Prior	fool	4.06869	42	15_www.dailymail.co.uk-78_www.wired.com-17_www.express.co.uk-45_www.npr.org-37_www.instructables.com-91_www.entrepreneur.com-11_link.springer.com-85_www.pcworld.com-60_www.csmonitor.com-journals.plos.org	10	0.10039734635474966-0.10036659017079687-0.09947892022482971-0.10061015196527949-0.0-0.09921528105557893-0.0998094657741253-0.09980421738211129-0.0-0.0-0.0-0.0-0.0-0.0-0.09972882862977092-0.10043864786277225-0.0-0.0-0.10015055057998554-0.0-0.0
deberta	average	Prior	fool	4.69124	10	www.frontiersin.org	1	0.0-0.0-0.0-0.0-0.0-0.0-0.0-0.0-0.0-0.0-0.0-0.0-0.0-0.0-0.0-0.0-0.0-0.0-0.0-1.0-0.0
deberta	ensemble	Prior	fool	4.04097	88	45_www.npr.org-60_www.csmonitor.com	2	0.0-0.0-0.0-0.5004265235670492-0.0-0.0-0.0-0.0-0.0-0.0-0.0-0.0-0.0-0.0-0.0-0.4995734764329508-0.0-0.0-0.0-0.0-0.0
deberta	ensemble	Prior	fool	4.00561	88	15_www.dailymail.co.uk-45_www.npr.org-60_www.csmonitor.com	3	0.3330523465835493-0.0-0.0-0.33375829560039555-0.0-0.0-0.0-0.0-0.0-0.0-0.0-0.0-0.0-0.0-0.0-0.333189357816055-0.0-0.0-0.0-0.0-0.0
deberta	ensemble	Prior	fool	4.06075	88	15_www.dailymail.co.uk-78_www.wired.com-17_www.express.co.uk-45_www.npr.org-91_www.entrepreneur.com-11_link.springer.com-85_www.pcworld.com-60_www.csmonitor.com-journals.plos.org	9	0.11145542796551838-0.11142128419808323-0.11043584347368088-0.11169167265978808-0.0-0.0-0.11080279635636625-0.11079696988983809-0.0-0.0-0.0-0.0-0.0-0.0-0.11071327758161519-0.11150127855240556-0.0-0.0-0.11118144932270424-0.0-0.0
deberta	ensemble	Prior	fool	4.07664	88	15_www.dailymail.co.uk-78_www.wired.com-17_www.express.co.uk-45_www.npr.org-37_www.instructables.com-91_www.entrepreneur.com-11_link.springer.com-85_www.pcworld.com-60_www.csmonitor.com-journals.plos.org	10	0.10039734635474966-0.10036659017079687-0.09947892022482971-0.10061015196527949-0.0-0.09921528105557893-0.0998094657741253-0.09980421738211129-0.0-0.0-0.0-0.0-0.0-0.0-0.09972882862977092-0.10043864786277225-0.0-0.0-0.10015055057998554-0.0-0.0
deberta	ensemble	Entropy	fastcompany	3.71908	5	15_www.dailymail.co.uk-45_www.npr.org-journals.plos.org	3	0.3341956146834196-0.0-0.0-0.33616654348361663-0.0-0.0-0.0-0.0-0.0-0.0-0.0-0.0-0.0-0.0-0.0-0.0-0.0-0.0-0.3296378418329638-0.0-0.0
deberta	ensemble	Entropy	fool	4.06075	10	15_www.dailymail.co.uk-78_www.wired.com-45_www.npr.org-91_www.entrepreneur.com-11_link.springer.com-85_www.pcworld.com-60_www.csmonitor.com-journals.plos.org-www.frontiersin.org	9	0.11290039336892385-0.11110037932003372-0.0-0.11322527395335769-0.0-0.0-0.10973939308794606-0.10941451250351222-0.0-0.0-0.0-0.0-0.0-0.0-0.10869450688395617-0.11237355998876089-0.0-0.0-0.11258429334082608-0.10996768755268334-0.0
deberta	ensemble	Entropy	fool	4.04097	42	15_www.dailymail.co.uk-78_www.wired.com-45_www.npr.org-91_www.entrepreneur.com-11_link.springer.com-85_www.pcworld.com-60_www.csmonitor.com-journals.plos.org-www.frontiersin.org	9	0.11290832455216017-0.111125746399719-0.0-0.11325957147874956-0.0-0.0-0.10974710221285564-0.10938707411310152-0.0-0.0-0.0-0.0-0.0-0.0-0.10868458025992273-0.11235511064278188-0.0-0.0-0.11255707762557078-0.10997541271513875-0.0
deberta	ensemble	Entropy	fool	4.04887	88	15_www.dailymail.co.uk-78_www.wired.com-45_www.npr.org-91_www.entrepreneur.com-11_link.springer.com-85_www.pcworld.com-60_www.csmonitor.com-journals.plos.org-www.frontiersin.org	9	0.11289359010402024-0.11111013494517852-0.0-0.11322743885296599-0.0-0.0-0.10976595445600225-0.10936182175991004-0.0-0.0-0.0-0.0-0.0-0.0-0.10871169524880517-0.11240160247399494-0.0-0.0-0.1125597413550745-0.10996802080404836-0.0
deberta	ensemble	Entropy	fool	3.99389	5	15_www.dailymail.co.uk-45_www.npr.org-journals.plos.org	3	0.3331720300024196-0.0-0.0-0.3378901524316477-0.0-0.0-0.0-0.0-0.0-0.0-0.0-0.0-0.0-0.0-0.0-0.0-0.0-0.0-0.3289378175659327-0.0-0.0
deberta	ensemble	Entropy	fool	4.07266	10	15_www.dailymail.co.uk-78_www.wired.com-45_www.npr.org-37_www.instructables.com-91_www.entrepreneur.com-11_link.springer.com-85_www.pcworld.com-60_www.csmonitor.com-journals.plos.org-www.frontiersin.org	10	0.10165864098448368-0.10025243171310587-0.0-0.10191244460907382-0.0-0.09765265945041227-0.09918920031279582-0.09893539668820568-0.0-0.0-0.0-0.0-0.0-0.0-0.09837291297965456-0.10124706753920237-0.0-0.0-0.1014116969173149-0.09936754880575105-0.0
deberta	ensemble	Entropy	fool	4.05678	42	15_www.dailymail.co.uk-78_www.wired.com-45_www.npr.org-91_www.entrepreneur.com-11_link.springer.com-22_forums.macrumors.com-85_www.pcworld.com-60_www.csmonitor.com-journals.plos.org-www.frontiersin.org	10	0.10166724962107963-0.10027501731717521-0.0-0.1019415811095337-0.0-0.0-0.09919826622499298-0.09891707644932754-0.0-0.0-0.0-0.0976277184535934-0.0-0.0-0.0983684134724194-0.10123517752676446-0.0-0.0-0.10139291813262556-0.09937658169248811-0.0
deberta	ensemble	Entropy	fool	4.06075	88	15_www.dailymail.co.uk-78_www.wired.com-45_www.npr.org-37_www.instructables.com-91_www.entrepreneur.com-11_link.springer.com-85_www.pcworld.com-60_www.csmonitor.com-journals.plos.org-www.frontiersin.org	10	0.10165572229426982-0.10026280217103413-0.0-0.10191646596265876-0.0-0.09762791878520898-0.09921296582199442-0.09889732874973411-0.0-0.0-0.0-0.0-0.0-0.0-0.09838956476392406-0.10127146846717032-0.0-0.0-0.10139497862588087-0.09937078435812456-0.0
deberta	ensemble	Entropy-topk-uniform	fool	3.98999	10	15_www.dailymail.co.uk-78_www.wired.com-45_www.npr.org-60_www.csmonitor.com-journals.plos.org	5	0.2-0.2-0.0-0.2-0.0-0.0-0.0-0.0-0.0-0.0-0.0-0.0-0.0-0.0-0.0-0.2-0.0-0.0-0.2-0.0-0.0
deberta	ensemble	Entropy-topk-uniform	fool	4.02129	10	15_www.dailymail.co.uk-78_www.wired.com-45_www.npr.org-60_www.csmonitor.com-journals.plos.org-www.frontiersin.org	6	0.16666666666666666-0.16666666666666666-0.0-0.16666666666666666-0.0-0.0-0.0-0.0-0.0-0.0-0.0-0.0-0.0-0.0-0.0-0.16666666666666666-0.0-0.0-0.16666666666666666-0.16666666666666666-0.0
deberta	ensemble	Entropy-topk-uniform	fool	4.02521	10	15_www.dailymail.co.uk-78_www.wired.com-45_www.npr.org-91_www.entrepreneur.com-60_www.csmonitor.com-journals.plos.org-www.frontiersin.org	7	0.14285714285714285-0.14285714285714285-0.0-0.14285714285714285-0.0-0.0-0.14285714285714285-0.0-0.0-0.0-0.0-0.0-0.0-0.0-0.0-0.14285714285714285-0.0-0.0-0.14285714285714285-0.14285714285714285-0.0
deberta	ensemble	Entropy-topk-uniform	fool	4.05678	10	15_www.dailymail.co.uk-78_www.wired.com-45_www.npr.org-91_www.entrepreneur.com-11_link.springer.com-60_www.csmonitor.com-journals.plos.org-www.frontiersin.org	8	0.125-0.125-0.0-0.125-0.0-0.0-0.125-0.125-0.0-0.0-0.0-0.0-0.0-0.0-0.0-0.125-0.0-0.0-0.125-0.125-0.0
deberta	ensemble	Entropy-topk-uniform	fool	4.06075	10	15_www.dailymail.co.uk-78_www.wired.com-45_www.npr.org-91_www.entrepreneur.com-11_link.springer.com-85_www.pcworld.com-60_www.csmonitor.com-journals.plos.org-www.frontiersin.org	9	0.1111111111111111-0.1111111111111111-0.0-0.1111111111111111-0.0-0.0-0.1111111111111111-0.1111111111111111-0.0-0.0-0.0-0.0-0.0-0.0-0.1111111111111111-0.1111111111111111-0.0-0.0-0.1111111111111111-0.1111111111111111-0.0
deberta	ensemble	Entropy-topk-uniform	fool	4.07664	10	15_www.dailymail.co.uk-78_www.wired.com-45_www.npr.org-37_www.instructables.com-91_www.entrepreneur.com-11_link.springer.com-85_www.pcworld.com-60_www.csmonitor.com-journals.plos.org-www.frontiersin.org	10	0.1-0.1-0.0-0.1-0.0-0.1-0.1-0.1-0.0-0.0-0.0-0.0-0.0-0.0-0.1-0.1-0.0-0.0-0.1-0.1-0.0
gpt2	average	Sentence Sim	fool	21.2609	10	91_www.entrepreneur.com-77_www.androidheadlines.com	2	0.0-0.0-0.0-0.0-0.0-0.0-0.5018985212130839-0.0-0.0-0.0-0.0-0.0-0.4981014787869161-0.0-0.0-0.0-0.0-0.0-0.0-0.0-0.0
gpt2	ensemble	Sentence Sim	fool	21.3392	10	91_www.entrepreneur.com-77_www.androidheadlines.com	2	0.0-0.0-0.0-0.0-0.0-0.0-0.5018985212130839-0.0-0.0-0.0-0.0-0.0-0.4981014787869161-0.0-0.0-0.0-0.0-0.0-0.0-0.0-0.0
gpt2	average	Sentence Sim	fool	21.3596	10	91_www.entrepreneur.com-77_www.androidheadlines.com-84_www.glassdoor.com	3	0.0-0.0-0.0-0.0-0.0-0.0-0.33972417650030295-0.0-0.0-0.0-0.0-0.0-0.33715404119038256-0.32312178230931443-0.0-0.0-0.0-0.0-0.0-0.0-0.0
gpt2	ensemble	Sentence Sim	fool	21.3392	10	91_www.entrepreneur.com-77_www.androidheadlines.com-84_www.glassdoor.com	3	0.0-0.0-0.0-0.0-0.0-0.0-0.33972417650030295-0.0-0.0-0.0-0.0-0.0-0.33715404119038256-0.32312178230931443-0.0-0.0-0.0-0.0-0.0-0.0-0.0
gpt2	average	Sentence Sim	fool	21.2231	10	91_www.entrepreneur.com-77_www.androidheadlines.com-84_www.glassdoor.com-85_www.pcworld.com	4	0.0-0.0-0.0-0.0-0.0-0.0-0.2616958452261822-0.0-0.0-0.0-0.0-0.0-0.25971602224389095-0.24890671250873156-0.2296814200211953-0.0-0.0-0.0-0.0-0.0-0.0
gpt2	ensemble	Sentence Sim	fool	21.1732	10	91_www.entrepreneur.com-77_www.androidheadlines.com-84_www.glassdoor.com-85_www.pcworld.com	4	0.0-0.0-0.0-0.0-0.0-0.0-0.2616958452261822-0.0-0.0-0.0-0.0-0.0-0.25971602224389095-0.24890671250873156-0.2296814200211953-0.0-0.0-0.0-0.0-0.0-0.0
gpt2	average	Sentence Sim	fool	21.1724	10	78_www.wired.com-91_www.entrepreneur.com-77_www.androidheadlines.com-84_www.glassdoor.com-85_www.pcworld.com	5	0.0-0.15755718505683547-0.0-0.0-0.0-0.0-0.22046378451127566-0.0-0.0-0.0-0.0-0.0-0.21879589686498505-0.20968967154410478-0.19349346202279907-0.0-0.0-0.0-0.0-0.0-0.0
gpt2	ensemble	Sentence Sim	fool	21.1318	10	78_www.wired.com-91_www.entrepreneur.com-77_www.androidheadlines.com-84_www.glassdoor.com-85_www.pcworld.com	5	0.0-0.15755718505683547-0.0-0.0-0.0-0.0-0.22046378451127566-0.0-0.0-0.0-0.0-0.0-0.21879589686498505-0.20968967154410478-0.19349346202279907-0.0-0.0-0.0-0.0-0.0-0.0
gpt2	average	Sentence Sim	fool	21.186	10	78_www.wired.com-91_www.entrepreneur.com-77_www.androidheadlines.com-84_www.glassdoor.com-85_www.pcworld.com-58_medium.com	6	0.0-0.1380562078259761-0.0-0.0-0.0-0.0-0.19317680778322224-0.0-0.0-0.0-0.0-0.0-0.19171535590818645-0.18373621528723597-0.16954462340991314-0.0-0.0-0.0-0.0-0.0-0.12377078978546611
gpt2	ensemble	Sentence Sim	fool	21.1732	10	78_www.wired.com-91_www.entrepreneur.com-77_www.androidheadlines.com-84_www.glassdoor.com-85_www.pcworld.com-58_medium.com	6	0.0-0.1380562078259761-0.0-0.0-0.0-0.0-0.19317680778322224-0.0-0.0-0.0-0.0-0.0-0.19171535590818645-0.18373621528723597-0.16954462340991314-0.0-0.0-0.0-0.0-0.0-0.12377078978546611
gpt2	average	Sentence Sim	fool	21.1531	10	78_www.wired.com-91_www.entrepreneur.com-77_www.androidheadlines.com-84_www.glassdoor.com-85_www.pcworld.com-60_www.csmonitor.com-58_medium.com	7	0.0-0.1233798602134837-0.0-0.0-0.0-0.0-0.17264075202488965-0.0-0.0-0.0-0.0-0.0-0.17133466278131185-0.16420376102803794-0.1515208353588204-0.10630704583014752-0.0-0.0-0.0-0.0-0.11061308276330903
gpt2	ensemble	Sentence Sim	fool	21.1318	10	78_www.wired.com-91_www.entrepreneur.com-77_www.androidheadlines.com-84_www.glassdoor.com-85_www.pcworld.com-60_www.csmonitor.com-58_medium.com	7	0.0-0.1233798602134837-0.0-0.0-0.0-0.0-0.17264075202488965-0.0-0.0-0.0-0.0-0.0-0.17133466278131185-0.16420376102803794-0.1515208353588204-0.10630704583014752-0.0-0.0-0.0-0.0-0.11061308276330903
gpt2	average	Sentence Sim	fool	21.1287	10	78_www.wired.com-45_www.npr.org-91_www.entrepreneur.com-77_www.androidheadlines.com-84_www.glassdoor.com-85_www.pcworld.com-60_www.csmonitor.com-58_medium.com	8	0.0-0.1123818711746616-0.0-0.08913925676194095-0.0-0.0-0.15725168370256845-0.0-0.0-0.0-0.0-0.0-0.15606201828342792-0.14956675981248327-0.13801438071098673-0.09683091477629059-0.0-0.0-0.0-0.0-0.10075311477764061
gpt2	ensemble	Sentence Sim	fool	21.0906	10	78_www.wired.com-45_www.npr.org-91_www.entrepreneur.com-77_www.androidheadlines.com-84_www.glassdoor.com-85_www.pcworld.com-60_www.csmonitor.com-58_medium.com	8	0.0-0.1123818711746616-0.0-0.08913925676194095-0.0-0.0-0.15725168370256845-0.0-0.0-0.0-0.0-0.0-0.15606201828342792-0.14956675981248327-0.13801438071098673-0.09683091477629059-0.0-0.0-0.0-0.0-0.10075311477764061
gpt2	average	Sentence Sim	fool	21.1384	10	78_www.wired.com-45_www.npr.org-91_www.entrepreneur.com-22_forums.macrumors.com-77_www.androidheadlines.com-84_www.glassdoor.com-85_www.pcworld.com-60_www.csmonitor.com-58_medium.com	9	0.0-0.10386474248756952-0.0-0.08238362515536943-0.0-0.0-0.14533398903920844-0.0-0.0-0.0-0.0-0.07578738988831148-0.14423448525702498-0.13823148547224315-0.12755463102984932-0.08949235248489798-0.0-0.0-0.0-0.0-0.09311729918552576
gpt2	ensemble	Sentence Sim	fool	21.0906	10	78_www.wired.com-45_www.npr.org-91_www.entrepreneur.com-22_forums.macrumors.com-77_www.androidheadlines.com-84_www.glassdoor.com-85_www.pcworld.com-60_www.csmonitor.com-58_medium.com	9	0.0-0.10386474248756952-0.0-0.08238362515536943-0.0-0.0-0.14533398903920844-0.0-0.0-0.0-0.0-0.07578738988831148-0.14423448525702498-0.13823148547224315-0.12755463102984932-0.08949235248489798-0.0-0.0-0.0-0.0-0.09311729918552576
gpt2	average	Sentence Sim	fool	21.1626	10	78_www.wired.com-45_www.npr.org-91_www.entrepreneur.com-70_www.insiderpages.com-22_forums.macrumors.com-77_www.androidheadlines.com-84_www.glassdoor.com-85_www.pcworld.com-60_www.csmonitor.com-58_medium.com	10	0.0-0.09671515414346386-0.0-0.07671270168269544-0.0-0.0-0.13532984163412093-0.0-0.06883556607249375-0.0-0.0-0.07057052200419277-0.1343060228171829-0.1287162429207196-0.11877433579774156-0.08333209574244088-0.0-0.0-0.0-0.0-0.08670751718494832
gpt2	ensemble	Sentence Sim	fool	21.0906	10	78_www.wired.com-45_www.npr.org-91_www.entrepreneur.com-70_www.insiderpages.com-22_forums.macrumors.com-77_www.androidheadlines.com-84_www.glassdoor.com-85_www.pcworld.com-60_www.csmonitor.com-58_medium.com	10	0.0-0.09671515414346386-0.0-0.07671270168269544-0.0-0.0-0.13532984163412093-0.0-0.06883556607249375-0.0-0.0-0.07057052200419277-0.1343060228171829-0.1287162429207196-0.11877433579774156-0.08333209574244088-0.0-0.0-0.0-0.0-0.08670751718494832
gpt2	average	Sentence Sim	fool	21.38	42	91_www.entrepreneur.com	1	0.0-0.0-0.0-0.0-0.0-0.0-1.0-0.0-0.0-0.0-0.0-0.0-0.0-0.0-0.0-0.0-0.0-0.0-0.0-0.0-0.0
gpt2	ensemble	Sentence Sim	fool	21.3809	42	91_www.entrepreneur.com	1	0.0-0.0-0.0-0.0-0.0-0.0-1.0-0.0-0.0-0.0-0.0-0.0-0.0-0.0-0.0-0.0-0.0-0.0-0.0-0.0-0.0
gpt2	average	Sentence Sim	fool	21.4947	42	91_www.entrepreneur.com-84_www.glassdoor.com	2	0.0-0.0-0.0-0.0-0.0-0.0-0.5035733708528402-0.0-0.0-0.0-0.0-0.0-0.0-0.49642662914715996-0.0-0.0-0.0-0.0-0.0-0.0-0.0
gpt2	ensemble	Sentence Sim	fool	21.4646	42	91_www.entrepreneur.com-84_www.glassdoor.com	2	0.0-0.0-0.0-0.0-0.0-0.0-0.5035733708528402-0.0-0.0-0.0-0.0-0.0-0.0-0.49642662914715996-0.0-0.0-0.0-0.0-0.0-0.0-0.0
gpt2	average	Sentence Sim	fool	21.2265	42	91_www.entrepreneur.com-84_www.glassdoor.com-85_www.pcworld.com	3	0.0-0.0-0.0-0.0-0.0-0.0-0.33732619768555194-0.0-0.0-0.0-0.0-0.0-0.0-0.33253884524605537-0.3301349570683927-0.0-0.0-0.0-0.0-0.0-0.0
gpt2	ensemble	Sentence Sim	fool	21.2146	42	91_www.entrepreneur.com-84_www.glassdoor.com-85_www.pcworld.com	3	0.0-0.0-0.0-0.0-0.0-0.0-0.33732619768555194-0.0-0.0-0.0-0.0-0.0-0.0-0.33253884524605537-0.3301349570683927-0.0-0.0-0.0-0.0-0.0-0.0
gpt2	average	Sentence Sim	fool	21.2194	42	91_www.entrepreneur.com-77_www.androidheadlines.com-84_www.glassdoor.com-85_www.pcworld.com	4	0.0-0.0-0.0-0.0-0.0-0.0-0.253708869470136-0.0-0.0-0.0-0.0-0.0-0.24788269867305757-0.2501082188728409-0.2483002129839655-0.0-0.0-0.0-0.0-0.0-0.0
gpt2	ensemble	Sentence Sim	fool	21.1732	42	91_www.entrepreneur.com-77_www.androidheadlines.com-84_www.glassdoor.com-85_www.pcworld.com	4	0.0-0.0-0.0-0.0-0.0-0.0-0.253708869470136-0.0-0.0-0.0-0.0-0.0-0.24788269867305757-0.2501082188728409-0.2483002129839655-0.0-0.0-0.0-0.0-0.0-0.0
gpt2	average	Sentence Sim	fool	21.1669	42	78_www.wired.com-91_www.entrepreneur.com-77_www.androidheadlines.com-84_www.glassdoor.com-85_www.pcworld.com	5	0.0-0.1724064365090279-0.0-0.0-0.0-0.0-0.20996782737405575-0.0-0.0-0.0-0.0-0.0-0.20514612592259457-0.2069879521153544-0.20549165807896735-0.0-0.0-0.0-0.0-0.0-0.0
gpt2	ensemble	Sentence Sim	fool	21.1318	42	78_www.wired.com-91_www.entrepreneur.com-77_www.androidheadlines.com-84_www.glassdoor.com-85_www.pcworld.com	5	0.0-0.1724064365090279-0.0-0.0-0.0-0.0-0.20996782737405575-0.0-0.0-0.0-0.0-0.0-0.20514612592259457-0.2069879521153544-0.20549165807896735-0.0-0.0-0.0-0.0-0.0-0.0
gpt2	average	Sentence Sim	fool	21.1212	42	78_www.wired.com-45_www.npr.org-91_www.entrepreneur.com-77_www.androidheadlines.com-84_www.glassdoor.com-85_www.pcworld.com	6	0.0-0.15051084883008076-0.0-0.12699982739797888-0.0-0.0-0.18330194953842208-0.0-0.0-0.0-0.0-0.0-0.17909260333906105-0.1807005179232433-0.17939425297121403-0.0-0.0-0.0-0.0-0.0-0.0
gpt2	ensemble	Sentence Sim	fool	21.0495	42	78_www.wired.com-45_www.npr.org-91_www.entrepreneur.com-77_www.androidheadlines.com-84_www.glassdoor.com-85_www.pcworld.com	6	0.0-0.15051084883008076-0.0-0.12699982739797888-0.0-0.0-0.18330194953842208-0.0-0.0-0.0-0.0-0.0-0.17909260333906105-0.1807005179232433-0.17939425297121403-0.0-0.0-0.0-0.0-0.0-0.0
gpt2	average	Sentence Sim	fool	21.1378	42	78_www.wired.com-45_www.npr.org-91_www.entrepreneur.com-77_www.androidheadlines.com-84_www.glassdoor.com-85_www.pcworld.com-58_medium.com	7	0.0-0.13429365116887182-0.0-0.11331588820115986-0.0-0.0-0.16355158622271512-0.0-0.0-0.0-0.0-0.0-0.15979578739133526-0.1612304528786138-0.160064934969669-0.0-0.0-0.0-0.0-0.0-0.10774769916763521
gpt2	ensemble	Sentence Sim	fool	21.0906	42	78_www.wired.com-45_www.npr.org-91_www.entrepreneur.com-77_www.androidheadlines.com-84_www.glassdoor.com-85_www.pcworld.com-58_medium.com	7	0.0-0.13429365116887182-0.0-0.11331588820115986-0.0-0.0-0.16355158622271512-0.0-0.0-0.0-0.0-0.0-0.15979578739133526-0.1612304528786138-0.160064934969669-0.0-0.0-0.0-0.0-0.0-0.10774769916763521
gpt2	average	Sentence Sim	fool	21.1673	42	78_www.wired.com-45_www.npr.org-91_www.entrepreneur.com-70_www.insiderpages.com-77_www.androidheadlines.com-84_www.glassdoor.com-85_www.pcworld.com-58_medium.com	8	0.0-0.12258975609108266-0.0-0.10344023693537409-0.0-0.0-0.1492978177958698-0.0-0.08715151443065398-0.0-0.0-0.0-0.1458693425205416-0.1471789747379024-0.1461150334798182-0.0-0.0-0.0-0.0-0.0-0.09835732400875727
gpt2	ensemble	Sentence Sim	fool	21.1318	42	78_www.wired.com-45_www.npr.org-91_www.entrepreneur.com-70_www.insiderpages.com-77_www.androidheadlines.com-84_www.glassdoor.com-85_www.pcworld.com-58_medium.com	8	0.0-0.12258975609108266-0.0-0.10344023693537409-0.0-0.0-0.1492978177958698-0.0-0.08715151443065398-0.0-0.0-0.0-0.1458693425205416-0.1471789747379024-0.1461150334798182-0.0-0.0-0.0-0.0-0.0-0.09835732400875727
gpt2	average	Sentence Sim	fool	21.1527	42	78_www.wired.com-45_www.npr.org-91_www.entrepreneur.com-70_www.insiderpages.com-77_www.androidheadlines.com-84_www.glassdoor.com-85_www.pcworld.com-60_www.csmonitor.com-58_medium.com	9	0.0-0.11345821929922878-0.0-0.09573512062343978-0.0-0.0-0.1381768354265636-0.0-0.08065972191988326-0.0-0.0-0.0-0.13500374240432803-0.13621582197815685-0.13523113219305338-0.07448857949492331-0.0-0.0-0.0-0.0-0.09103082666042303
gpt2	ensemble	Sentence Sim	fool	21.0906	42	78_www.wired.com-45_www.npr.org-91_www.entrepreneur.com-70_www.insiderpages.com-77_www.androidheadlines.com-84_www.glassdoor.com-85_www.pcworld.com-60_www.csmonitor.com-58_medium.com	9	0.0-0.11345821929922878-0.0-0.09573512062343978-0.0-0.0-0.1381768354265636-0.0-0.08065972191988326-0.0-0.0-0.0-0.13500374240432803-0.13621582197815685-0.13523113219305338-0.07448857949492331-0.0-0.0-0.0-0.0-0.09103082666042303
gpt2	average	Sentence Sim	fool	21.1719	42	78_www.wired.com-45_www.npr.org-91_www.entrepreneur.com-70_www.insiderpages.com-10_www.eventbrite.com-77_www.androidheadlines.com-84_www.glassdoor.com-85_www.pcworld.com-60_www.csmonitor.com-58_medium.com	10	0.0-0.1057476276634935-0.0-0.08922898625182249-0.0-0.0-0.12878637294554635-0.0-0.07517810779780781-0.0-0.06795974485902852-0.0-0.1258289225155159-0.12695862947075848-0.12604085895221592-0.06942635463753687-0.0-0.0-0.0-0.0-0.08484439490627423
gpt2	ensemble	Sentence Sim	fool	21.1318	42	78_www.wired.com-45_www.npr.org-91_www.entrepreneur.com-70_www.insiderpages.com-10_www.eventbrite.com-77_www.androidheadlines.com-84_www.glassdoor.com-85_www.pcworld.com-60_www.csmonitor.com-58_medium.com	10	0.0-0.1057476276634935-0.0-0.08922898625182249-0.0-0.0-0.12878637294554635-0.0-0.07517810779780781-0.0-0.06795974485902852-0.0-0.1258289225155159-0.12695862947075848-0.12604085895221592-0.06942635463753687-0.0-0.0-0.0-0.0-0.08484439490627423
gpt2	average	tfidf-topk-uniform	fool	21.1231	5	78_www.wired.com-45_www.npr.org-91_www.entrepreneur.com-22_forums.macrumors.com-77_www.androidheadlines.com-84_www.glassdoor.com-85_www.pcworld.com-60_www.csmonitor.com	10	0.0-0.125-0.0-0.125-0.0-0.0-0.125-0.0-0.0-0.0-0.0-0.125-0.125-0.125-0.125-0.125-0.0-0.0-0.0-0.0-0.0
gpt2	ensemble	tfidf-topk-uniform	fool	21.0495	5	78_www.wired.com-45_www.npr.org-91_www.entrepreneur.com-22_forums.macrumors.com-77_www.androidheadlines.com-84_www.glassdoor.com-85_www.pcworld.com-60_www.csmonitor.com	10	0.0-0.125-0.0-0.125-0.0-0.0-0.125-0.0-0.0-0.0-0.0-0.125-0.125-0.125-0.125-0.125-0.0-0.0-0.0-0.0-0.0
gpt2	average	tfidf-topk-uniform	fool	21.1384	10	15_www.dailymail.co.uk-78_www.wired.com-45_www.npr.org-91_www.entrepreneur.com-22_forums.macrumors.com-77_www.androidheadlines.com-84_www.glassdoor.com-85_www.pcworld.com-60_www.csmonitor.com	10	0.1111111111111111-0.1111111111111111-0.0-0.1111111111111111-0.0-0.0-0.1111111111111111-0.0-0.0-0.0-0.0-0.1111111111111111-0.1111111111111111-0.1111111111111111-0.1111111111111111-0.1111111111111111-0.0-0.0-0.0-0.0-0.0
gpt2	ensemble	tfidf-topk-uniform	fool	21.0495	10	15_www.dailymail.co.uk-78_www.wired.com-45_www.npr.org-91_www.entrepreneur.com-22_forums.macrumors.com-77_www.androidheadlines.com-84_www.glassdoor.com-85_www.pcworld.com-60_www.csmonitor.com	10	0.1111111111111111-0.1111111111111111-0.0-0.1111111111111111-0.0-0.0-0.1111111111111111-0.0-0.0-0.0-0.0-0.1111111111111111-0.1111111111111111-0.1111111111111111-0.1111111111111111-0.1111111111111111-0.0-0.0-0.0-0.0-0.0
gpt2	average	Sentence Sim-topk-uniform	fool	21.1786	5	78_www.wired.com-45_www.npr.org-91_www.entrepreneur.com-70_www.insiderpages.com-22_forums.macrumors.com-77_www.androidheadlines.com-84_www.glassdoor.com-85_www.pcworld.com-60_www.csmonitor.com-58_medium.com	10	0.0-0.1-0.0-0.1-0.0-0.0-0.1-0.0-0.1-0.0-0.0-0.1-0.1-0.1-0.1-0.1-0.0-0.0-0.0-0.0-0.1
gpt2	ensemble	Sentence Sim-topk-uniform	fool	21.1318	5	78_www.wired.com-45_www.npr.org-91_www.entrepreneur.com-70_www.insiderpages.com-22_forums.macrumors.com-77_www.androidheadlines.com-84_www.glassdoor.com-85_www.pcworld.com-60_www.csmonitor.com-58_medium.com	10	0.0-0.1-0.0-0.1-0.0-0.0-0.1-0.0-0.1-0.0-0.0-0.1-0.1-0.1-0.1-0.1-0.0-0.0-0.0-0.0-0.1
gpt2	average	Sentence Sim-topk-uniform	fool	21.1786	10	78_www.wired.com-45_www.npr.org-91_www.entrepreneur.com-70_www.insiderpages.com-22_forums.macrumors.com-77_www.androidheadlines.com-84_www.glassdoor.com-85_www.pcworld.com-60_www.csmonitor.com-58_medium.com	10	0.0-0.1-0.0-0.1-0.0-0.0-0.1-0.0-0.1-0.0-0.0-0.1-0.1-0.1-0.1-0.1-0.0-0.0-0.0-0.0-0.1
gpt2	ensemble	Sentence Sim-topk-uniform	fool	21.1318	10	78_www.wired.com-45_www.npr.org-91_www.entrepreneur.com-70_www.insiderpages.com-22_forums.macrumors.com-77_www.androidheadlines.com-84_www.glassdoor.com-85_www.pcworld.com-60_www.csmonitor.com-58_medium.com	10	0.0-0.1-0.0-0.1-0.0-0.0-0.1-0.0-0.1-0.0-0.0-0.1-0.1-0.1-0.1-0.1-0.0-0.0-0.0-0.0-0.1
gpt2	average	tfidf-topk-uniform	fool	21.1561	42	15_www.dailymail.co.uk-78_www.wired.com-45_www.npr.org-91_www.entrepreneur.com-22_forums.macrumors.com-77_www.androidheadlines.com-84_www.glassdoor.com-85_www.pcworld.com-60_www.csmonitor.com-58_medium.com	10	0.1-0.1-0.0-0.1-0.0-0.0-0.1-0.0-0.0-0.0-0.0-0.1-0.1-0.1-0.1-0.1-0.0-0.0-0.0-0.0-0.1
gpt2	ensemble	tfidf-topk-uniform	fool	21.0906	42	15_www.dailymail.co.uk-78_www.wired.com-45_www.npr.org-91_www.entrepreneur.com-22_forums.macrumors.com-77_www.androidheadlines.com-84_www.glassdoor.com-85_www.pcworld.com-60_www.csmonitor.com-58_medium.com	10	0.1-0.1-0.0-0.1-0.0-0.0-0.1-0.0-0.0-0.0-0.0-0.1-0.1-0.1-0.1-0.1-0.0-0.0-0.0-0.0-0.1
gpt2	average	Sentence Sim-topk-uniform	fool	21.1942	42	78_www.wired.com-45_www.npr.org-91_www.entrepreneur.com-70_www.insiderpages.com-10_www.eventbrite.com-77_www.androidheadlines.com-84_www.glassdoor.com-85_www.pcworld.com-60_www.csmonitor.com-58_medium.com	10	0.0-0.1-0.0-0.1-0.0-0.0-0.1-0.0-0.1-0.0-0.1-0.0-0.1-0.1-0.1-0.1-0.0-0.0-0.0-0.0-0.1
gpt2	ensemble	Sentence Sim-topk-uniform	fool	21.1318	42	78_www.wired.com-45_www.npr.org-91_www.entrepreneur.com-70_www.insiderpages.com-10_www.eventbrite.com-77_www.androidheadlines.com-84_www.glassdoor.com-85_www.pcworld.com-60_www.csmonitor.com-58_medium.com	10	0.0-0.1-0.0-0.1-0.0-0.0-0.1-0.0-0.1-0.0-0.1-0.0-0.1-0.1-0.1-0.1-0.0-0.0-0.0-0.0-0.1
gpt2	average	tfidf-topk-uniform	fool	21.1561	88	15_www.dailymail.co.uk-78_www.wired.com-45_www.npr.org-91_www.entrepreneur.com-22_forums.macrumors.com-77_www.androidheadlines.com-84_www.glassdoor.com-85_www.pcworld.com-60_www.csmonitor.com-58_medium.com	10	0.1-0.1-0.0-0.1-0.0-0.0-0.1-0.0-0.0-0.0-0.0-0.1-0.1-0.1-0.1-0.1-0.0-0.0-0.0-0.0-0.1
gpt2	ensemble	tfidf-topk-uniform	fool	21.0906	88	15_www.dailymail.co.uk-78_www.wired.com-45_www.npr.org-91_www.entrepreneur.com-22_forums.macrumors.com-77_www.androidheadlines.com-84_www.glassdoor.com-85_www.pcworld.com-60_www.csmonitor.com-58_medium.com	10	0.1-0.1-0.0-0.1-0.0-0.0-0.1-0.0-0.0-0.0-0.0-0.1-0.1-0.1-0.1-0.1-0.0-0.0-0.0-0.0-0.1
gpt2	average	Sentence Sim-topk-uniform	fool	21.1786	88	78_www.wired.com-45_www.npr.org-91_www.entrepreneur.com-70_www.insiderpages.com-22_forums.macrumors.com-77_www.androidheadlines.com-84_www.glassdoor.com-85_www.pcworld.com-60_www.csmonitor.com-58_medium.com	10	0.0-0.1-0.0-0.1-0.0-0.0-0.1-0.0-0.1-0.0-0.0-0.1-0.1-0.1-0.1-0.1-0.0-0.0-0.0-0.0-0.1
gpt2	ensemble	Sentence Sim-topk-uniform	fool	21.1318	88	78_www.wired.com-45_www.npr.org-91_www.entrepreneur.com-70_www.insiderpages.com-22_forums.macrumors.com-77_www.androidheadlines.com-84_www.glassdoor.com-85_www.pcworld.com-60_www.csmonitor.com-58_medium.com	10	0.0-0.1-0.0-0.1-0.0-0.0-0.1-0.0-0.1-0.0-0.0-0.1-0.1-0.1-0.1-0.1-0.0-0.0-0.0-0.0-0.1
deberta	ensemble	tfidf-topk-uniform	fool	4.20194	5	78_www.wired.com-91_www.entrepreneur.com-77_www.androidheadlines.com-85_www.pcworld.com-60_www.csmonitor.com	5	0.0-0.2-0.0-0.0-0.0-0.0-0.2-0.0-0.0-0.0-0.0-0.0-0.2-0.0-0.2-0.2-0.0-0.0-0.0-0.0-0.0
deberta	ensemble	Sentence Sim-topk-uniform	fool	4.49923	5	78_www.wired.com-91_www.entrepreneur.com-77_www.androidheadlines.com-84_www.glassdoor.com-85_www.pcworld.com	5	0.0-0.2-0.0-0.0-0.0-0.0-0.2-0.0-0.0-0.0-0.0-0.0-0.2-0.2-0.2-0.0-0.0-0.0-0.0-0.0-0.0
gpt2	average	Sentence Sim	fool	22.7681	88	84_www.glassdoor.com	1	0.0-0.0-0.0-0.0-0.0-0.0-0.0-0.0-0.0-0.0-0.0-0.0-0.0-1.0-0.0-0.0-0.0-0.0-0.0-0.0-0.0
gpt2	ensemble	Sentence Sim	fool	22.8044	88	84_www.glassdoor.com	1	0.0-0.0-0.0-0.0-0.0-0.0-0.0-0.0-0.0-0.0-0.0-0.0-0.0-1.0-0.0-0.0-0.0-0.0-0.0-0.0-0.0
gpt2	average	Sentence Sim	fool	21.8062	88	77_www.androidheadlines.com-84_www.glassdoor.com	2	0.0-0.0-0.0-0.0-0.0-0.0-0.0-0.0-0.0-0.0-0.0-0.0-0.4987976307517718-0.5012023692482284-0.0-0.0-0.0-0.0-0.0-0.0-0.0
gpt2	ensemble	Sentence Sim	fool	21.8453	88	77_www.androidheadlines.com-84_www.glassdoor.com	2	0.0-0.0-0.0-0.0-0.0-0.0-0.0-0.0-0.0-0.0-0.0-0.0-0.4987976307517718-0.5012023692482284-0.0-0.0-0.0-0.0-0.0-0.0-0.0
gpt2	average	Sentence Sim	fool	21.3733	88	91_www.entrepreneur.com-77_www.androidheadlines.com-84_www.glassdoor.com	3	0.0-0.0-0.0-0.0-0.0-0.0-0.3309844380862542-0.0-0.0-0.0-0.0-0.0-0.33370337721864163-0.33531218469510415-0.0-0.0-0.0-0.0-0.0-0.0-0.0
gpt2	ensemble	Sentence Sim	fool	21.3392	88	91_www.entrepreneur.com-77_www.androidheadlines.com-84_www.glassdoor.com	3	0.0-0.0-0.0-0.0-0.0-0.0-0.3309844380862542-0.0-0.0-0.0-0.0-0.0-0.33370337721864163-0.33531218469510415-0.0-0.0-0.0-0.0-0.0-0.0-0.0
gpt2	average	Sentence Sim	fool	21.2273	88	91_www.entrepreneur.com-77_www.androidheadlines.com-84_www.glassdoor.com-85_www.pcworld.com	4	0.0-0.0-0.0-0.0-0.0-0.0-0.2520313607303396-0.0-0.0-0.0-0.0-0.0-0.25410172371550205-0.255326766015951-0.23854014953820737-0.0-0.0-0.0-0.0-0.0-0.0
gpt2	ensemble	Sentence Sim	fool	21.2146	88	91_www.entrepreneur.com-77_www.androidheadlines.com-84_www.glassdoor.com-85_www.pcworld.com	4	0.0-0.0-0.0-0.0-0.0-0.0-0.2520313607303396-0.0-0.0-0.0-0.0-0.0-0.25410172371550205-0.255326766015951-0.23854014953820737-0.0-0.0-0.0-0.0-0.0-0.0
gpt2	average	Sentence Sim	fool	21.1743	88	78_www.wired.com-91_www.entrepreneur.com-77_www.androidheadlines.com-84_www.glassdoor.com-85_www.pcworld.com	5	0.0-0.16278006707268117-0.0-0.0-0.0-0.0-0.2110056789262358-0.0-0.0-0.0-0.0-0.0-0.21273902808580872-0.21376465791842372-0.19971056799685058-0.0-0.0-0.0-0.0-0.0-0.0
gpt2	ensemble	Sentence Sim	fool	21.1318	88	78_www.wired.com-91_www.entrepreneur.com-77_www.androidheadlines.com-84_www.glassdoor.com-85_www.pcworld.com	5	0.0-0.16278006707268117-0.0-0.0-0.0-0.0-0.2110056789262358-0.0-0.0-0.0-0.0-0.0-0.21273902808580872-0.21376465791842372-0.19971056799685058-0.0-0.0-0.0-0.0-0.0-0.0
gpt2	average	Sentence Sim	fool	21.191	88	78_www.wired.com-91_www.entrepreneur.com-77_www.androidheadlines.com-84_www.glassdoor.com-85_www.pcworld.com-58_medium.com	6	0.0-0.14069038899978414-0.0-0.0-0.0-0.0-0.18237166001437194-0.0-0.0-0.0-0.0-0.0-0.18386978918902006-0.18475623838833116-0.17260932498755702-0.0-0.0-0.0-0.0-0.0-0.13570259842093577
gpt2	ensemble	Sentence Sim	fool	21.1732	88	78_www.wired.com-91_www.entrepreneur.com-77_www.androidheadlines.com-84_www.glassdoor.com-85_www.pcworld.com-58_medium.com	6	0.0-0.14069038899978414-0.0-0.0-0.0-0.0-0.18237166001437194-0.0-0.0-0.0-0.0-0.0-0.18386978918902006-0.18475623838833116-0.17260932498755702-0.0-0.0-0.0-0.0-0.0-0.13570259842093577
gpt2	average	Sentence Sim	fool	21.1444	88	78_www.wired.com-45_www.npr.org-91_www.entrepreneur.com-77_www.androidheadlines.com-84_www.glassdoor.com-85_www.pcworld.com-58_medium.com	7	0.0-0.12448373039503603-0.0-0.11519378629888487-0.0-0.0-0.16136357798370352-0.0-0.0-0.0-0.0-0.0-0.1626891319863591-0.16347346774603994-0.15272580329174562-0.0-0.0-0.0-0.0-0.0-0.1200705022982311
gpt2	ensemble	Sentence Sim	fool	21.0906	88	78_www.wired.com-45_www.npr.org-91_www.entrepreneur.com-77_www.androidheadlines.com-84_www.glassdoor.com-85_www.pcworld.com-58_medium.com	7	0.0-0.12448373039503603-0.0-0.11519378629888487-0.0-0.0-0.16136357798370352-0.0-0.0-0.0-0.0-0.0-0.1626891319863591-0.16347346774603994-0.15272580329174562-0.0-0.0-0.0-0.0-0.0-0.1200705022982311
gpt2	average	Sentence Sim	fool	21.1301	88	78_www.wired.com-45_www.npr.org-91_www.entrepreneur.com-77_www.androidheadlines.com-84_www.glassdoor.com-85_www.pcworld.com-60_www.csmonitor.com-58_medium.com	8	0.0-0.11341065079202332-0.0-0.10494706601333298-0.0-0.0-0.14700996134343813-0.0-0.0-0.0-0.0-0.0-0.14821760463645384-0.148932172143891-0.13914053418134148-0.08895202262876799-0.0-0.0-0.0-0.0-0.10938998826075129
gpt2	ensemble	Sentence Sim	fool	21.0906	88	78_www.wired.com-45_www.npr.org-91_www.entrepreneur.com-77_www.androidheadlines.com-84_www.glassdoor.com-85_www.pcworld.com-60_www.csmonitor.com-58_medium.com	8	0.0-0.11341065079202332-0.0-0.10494706601333298-0.0-0.0-0.14700996134343813-0.0-0.0-0.0-0.0-0.0-0.14821760463645384-0.148932172143891-0.13914053418134148-0.08895202262876799-0.0-0.0-0.0-0.0-0.10938998826075129
gpt2	average	Sentence Sim	fool	21.1576	88	78_www.wired.com-45_www.npr.org-91_www.entrepreneur.com-70_www.insiderpages.com-77_www.androidheadlines.com-84_www.glassdoor.com-85_www.pcworld.com-60_www.csmonitor.com-58_medium.com	9	0.0-0.10421546803954602-0.0-0.09643809931056216-0.0-0.0-0.1350905917644161-0.0-0.08107865256271006-0.0-0.0-0.0-0.13620032096645768-0.13685695230322675-0.1278592071530626-0.08173991249129979-0.0-0.0-0.0-0.0-0.10052079540871892
gpt2	ensemble	Sentence Sim	fool	21.0906	88	78_www.wired.com-45_www.npr.org-91_www.entrepreneur.com-70_www.insiderpages.com-77_www.androidheadlines.com-84_www.glassdoor.com-85_www.pcworld.com-60_www.csmonitor.com-58_medium.com	9	0.0-0.10421546803954602-0.0-0.09643809931056216-0.0-0.0-0.1350905917644161-0.0-0.08107865256271006-0.0-0.0-0.0-0.13620032096645768-0.13685695230322675-0.1278592071530626-0.08173991249129979-0.0-0.0-0.0-0.0-0.10052079540871892
gpt2	average	Sentence Sim	fool	21.1787	88	78_www.wired.com-45_www.npr.org-91_www.entrepreneur.com-70_www.insiderpages.com-10_www.eventbrite.com-77_www.androidheadlines.com-84_www.glassdoor.com-85_www.pcworld.com-60_www.csmonitor.com-58_medium.com	10	0.0-0.09649006640582276-0.0-0.0892892272286916-0.0-0.0-0.12507644417241523-0.0-0.07506836285475271-0.0-0.0741291266934746-0.0-0.12610391011784322-0.12671186594705802-0.118381115787086-0.0756806041623187-0.0-0.0-0.0-0.0-0.09306927663053714
gpt2	ensemble	Sentence Sim	fool	21.1318	88	78_www.wired.com-45_www.npr.org-91_www.entrepreneur.com-70_www.insiderpages.com-10_www.eventbrite.com-77_www.androidheadlines.com-84_www.glassdoor.com-85_www.pcworld.com-60_www.csmonitor.com-58_medium.com	10	0.0-0.09649006640582276-0.0-0.0892892272286916-0.0-0.0-0.12507644417241523-0.0-0.07506836285475271-0.0-0.0741291266934746-0.0-0.12610391011784322-0.12671186594705802-0.118381115787086-0.0756806041623187-0.0-0.0-0.0-0.0-0.09306927663053714
gpt2	average	Prior	fool	24.2336	10	journals.plos.org	1	0.0-0.0-0.0-0.0-0.0-0.0-0.0-0.0-0.0-0.0-0.0-0.0-0.0-0.0-0.0-0.0-0.0-0.0-1.0-0.0-0.0
gpt2	average	Prior	fool	21.8648	10	22_forums.macrumors.com-journals.plos.org	2	0.0-0.0-0.0-0.0-0.0-0.0-0.0-0.0-0.0-0.0-0.0-0.48660900353691744-0.0-0.0-0.0-0.0-0.0-0.0-0.5133909964630826-0.0-0.0
gpt2	average	Prior	fool	21.9153	10	22_forums.macrumors.com-journals.plos.org-www.frontiersin.org	3	0.0-0.0-0.0-0.0-0.0-0.0-0.0-0.0-0.0-0.0-0.0-0.3300618713181995-0.0-0.0-0.0-0.0-0.0-0.0-0.34822782106140066-0.3217103076203998-0.0
gpt2	average	Prior	fool	21.768	10	70_www.insiderpages.com-22_forums.macrumors.com-journals.plos.org-www.frontiersin.org	4	0.0-0.0-0.0-0.0-0.0-0.0-0.0-0.0-0.23989946863451064-0.0-0.0-0.2508802037724512-0.0-0.0-0.0-0.0-0.0-0.0-0.2646881518250172-0.24453217576802094-0.0
gpt2	average	Prior	fool	21.564	10	15_www.dailymail.co.uk-11_link.springer.com-22_forums.macrumors.com-60_www.csmonitor.com-journals.plos.org-www.frontiersin.org	6	0.14823364893660426-0.0-0.0-0.0-0.0-0.0-0.0-0.15369030090899471-0.0-0.0-0.0-0.15869931653829153-0.0-0.0-0.0-0.15188956904410544-0.0-0.0-0.20787123859648302-0.17961592597552112-0.0
gpt2	average	Prior	fool	21.5192	10	15_www.dailymail.co.uk-78_www.wired.com-70_www.insiderpages.com-22_forums.macrumors.com-39_www.booking.com-journals.plos.org-www.frontiersin.org	7	0.13207059191564288-0.1311672802086979-0.0-0.0-0.0-0.0-0.0-0.0-0.1433245399306714-0.0-0.0-0.1498848246228547-0.0-0.0-0.0-0.0-0.0-0.13932629049567785-0.15813418763013876-0.14609228519631634-0.0
gpt2	average	Prior	fool	21.538	10	15_www.dailymail.co.uk-78_www.wired.com-11_link.springer.com-70_www.insiderpages.com-22_forums.macrumors.com-39_www.booking.com-journals.plos.org-www.frontiersin.org	8	0.11688965167187428-0.11609017171767397-0.0-0.0-0.0-0.0-0.0-0.11494565159112112-0.12685000729934273-0.0-0.0-0.13265621579295978-0.0-0.0-0.0-0.0-0.0-0.12331133925087835-0.13995735039415985-0.12929961228198986-0.0
gpt2	average	Prior	fool	21.5133	10	15_www.dailymail.co.uk-78_www.wired.com-11_link.springer.com-70_www.insiderpages.com-22_forums.macrumors.com-39_www.booking.com-journals.plos.org-www.frontiersin.org-58_medium.com	9	0.10490669172937295-0.10418917058101207-0.0-0.0-0.0-0.0-0.0-0.10316198110463833-0.11384596002541478-0.0-0.0-0.11905694419590582-0.0-0.0-0.0-0.0-0.0-0.11067005905571277-0.12560960190279036-0.11604444339068887-0.10251514801446401
gpt2	average	Prior	fool	21.5206	10	15_www.dailymail.co.uk-37_www.instructables.com-11_link.springer.com-70_www.insiderpages.com-22_forums.macrumors.com-60_www.csmonitor.com-39_www.booking.com-journals.plos.org-www.frontiersin.org-58_medium.com	10	0.09474668241989462-0.0-0.0-0.0-0.0-0.08948525533240377-0.0-0.09823441732497731-0.08902526725335609-0.0-0.0-0.10143603596197276-0.0-0.0-0.0-0.09708344133976753-0.0-0.0906478539697948-0.13286531343469937-0.1148053307601985-0.09167040220293521
gpt2	average	Sentence Sim-topk-uniform	fool	21.5003	5	91_www.entrepreneur.com-84_www.glassdoor.com	2	0.0-0.0-0.0-0.0-0.0-0.0-0.5-0.0-0.0-0.0-0.0-0.0-0.0-0.5-0.0-0.0-0.0-0.0-0.0-0.0-0.0
gpt2	ensemble	Sentence Sim-topk-uniform	fool	21.4646	5	91_www.entrepreneur.com-84_www.glassdoor.com	2	0.0-0.0-0.0-0.0-0.0-0.0-0.5-0.0-0.0-0.0-0.0-0.0-0.0-0.5-0.0-0.0-0.0-0.0-0.0-0.0-0.0
gpt2	average	Sentence Sim-topk-uniform	fool	21.2624	10	91_www.entrepreneur.com-77_www.androidheadlines.com	2	0.0-0.0-0.0-0.0-0.0-0.0-0.5-0.0-0.0-0.0-0.0-0.0-0.5-0.0-0.0-0.0-0.0-0.0-0.0-0.0-0.0
gpt2	ensemble	Sentence Sim-topk-uniform	fool	21.3392	10	91_www.entrepreneur.com-77_www.androidheadlines.com	2	0.0-0.0-0.0-0.0-0.0-0.0-0.5-0.0-0.0-0.0-0.0-0.0-0.5-0.0-0.0-0.0-0.0-0.0-0.0-0.0-0.0
gpt2	average	Sentence Sim-topk-uniform	fool	21.5003	42	91_www.entrepreneur.com-84_www.glassdoor.com	2	0.0-0.0-0.0-0.0-0.0-0.0-0.5-0.0-0.0-0.0-0.0-0.0-0.0-0.5-0.0-0.0-0.0-0.0-0.0-0.0-0.0
gpt2	ensemble	Sentence Sim-topk-uniform	fool	21.4646	42	91_www.entrepreneur.com-84_www.glassdoor.com	2	0.0-0.0-0.0-0.0-0.0-0.0-0.5-0.0-0.0-0.0-0.0-0.0-0.0-0.5-0.0-0.0-0.0-0.0-0.0-0.0-0.0
gpt2	average	Sentence Sim-topk-uniform	fool	21.8054	88	77_www.androidheadlines.com-84_www.glassdoor.com	2	0.0-0.0-0.0-0.0-0.0-0.0-0.0-0.0-0.0-0.0-0.0-0.0-0.5-0.5-0.0-0.0-0.0-0.0-0.0-0.0-0.0
gpt2	ensemble	Sentence Sim-topk-uniform	fool	21.8453	88	77_www.androidheadlines.com-84_www.glassdoor.com	2	0.0-0.0-0.0-0.0-0.0-0.0-0.0-0.0-0.0-0.0-0.0-0.0-0.5-0.5-0.0-0.0-0.0-0.0-0.0-0.0-0.0
deberta	ensemble	Sentence Sim-topk-uniform	fool	5.27042	5	91_www.entrepreneur.com-84_www.glassdoor.com	2	0.0-0.0-0.0-0.0-0.0-0.0-0.5-0.0-0.0-0.0-0.0-0.0-0.0-0.5-0.0-0.0-0.0-0.0-0.0-0.0-0.0
deberta	ensemble	Sentence Sim-topk-uniform	fool	4.39072	10	91_www.entrepreneur.com-77_www.androidheadlines.com	2	0.0-0.0-0.0-0.0-0.0-0.0-0.5-0.0-0.0-0.0-0.0-0.0-0.5-0.0-0.0-0.0-0.0-0.0-0.0-0.0-0.0
deberta	ensemble	Sentence Sim-topk-uniform	fool	5.23963	42	91_www.entrepreneur.com-84_www.glassdoor.com	2	0.0-0.0-0.0-0.0-0.0-0.0-0.5-0.0-0.0-0.0-0.0-0.0-0.0-0.5-0.0-0.0-0.0-0.0-0.0-0.0-0.0
deberta	ensemble	Sentence Sim-topk-uniform	fool	5.67092	88	77_www.androidheadlines.com-84_www.glassdoor.com	2	0.0-0.0-0.0-0.0-0.0-0.0-0.0-0.0-0.0-0.0-0.0-0.0-0.5-0.5-0.0-0.0-0.0-0.0-0.0-0.0-0.0
deberta	ensemble	Sentence Sim-topk-uniform	fool	4.49045	10	78_www.wired.com-91_www.entrepreneur.com-77_www.androidheadlines.com-84_www.glassdoor.com-85_www.pcworld.com	5	0.0-0.2-0.0-0.0-0.0-0.0-0.2-0.0-0.0-0.0-0.0-0.0-0.2-0.2-0.2-0.0-0.0-0.0-0.0-0.0-0.0
deberta	ensemble	Sentence Sim-topk-uniform	fool	4.47294	42	78_www.wired.com-91_www.entrepreneur.com-77_www.androidheadlines.com-84_www.glassdoor.com-85_www.pcworld.com	5	0.0-0.2-0.0-0.0-0.0-0.0-0.2-0.0-0.0-0.0-0.0-0.0-0.2-0.2-0.2-0.0-0.0-0.0-0.0-0.0-0.0
deberta	ensemble	Sentence Sim-topk-uniform	fool	4.48169	88	78_www.wired.com-91_www.entrepreneur.com-77_www.androidheadlines.com-84_www.glassdoor.com-85_www.pcworld.com	5	0.0-0.2-0.0-0.0-0.0-0.0-0.2-0.0-0.0-0.0-0.0-0.0-0.2-0.2-0.2-0.0-0.0-0.0-0.0-0.0-0.0
deberta	ensemble	Sentence Sim-topk-uniform	fool	4.36933	5	78_www.wired.com-45_www.npr.org-91_www.entrepreneur.com-70_www.insiderpages.com-22_forums.macrumors.com-77_www.androidheadlines.com-84_www.glassdoor.com-85_www.pcworld.com-60_www.csmonitor.com-58_medium.com	10	0.0-0.1-0.0-0.1-0.0-0.0-0.1-0.0-0.1-0.0-0.0-0.1-0.1-0.1-0.1-0.1-0.0-0.0-0.0-0.0-0.1
deberta	ensemble	Sentence Sim-topk-uniform	fool	4.3608	10	78_www.wired.com-45_www.npr.org-91_www.entrepreneur.com-70_www.insiderpages.com-22_forums.macrumors.com-77_www.androidheadlines.com-84_www.glassdoor.com-85_www.pcworld.com-60_www.csmonitor.com-58_medium.com	10	0.0-0.1-0.0-0.1-0.0-0.0-0.1-0.0-0.1-0.0-0.0-0.1-0.1-0.1-0.1-0.1-0.0-0.0-0.0-0.0-0.1
deberta	ensemble	Sentence Sim-topk-uniform	fool	4.3993	42	78_www.wired.com-45_www.npr.org-91_www.entrepreneur.com-70_www.insiderpages.com-10_www.eventbrite.com-77_www.androidheadlines.com-84_www.glassdoor.com-85_www.pcworld.com-60_www.csmonitor.com-58_medium.com	10	0.0-0.1-0.0-0.1-0.0-0.0-0.1-0.0-0.1-0.0-0.1-0.0-0.1-0.1-0.1-0.1-0.0-0.0-0.0-0.0-0.1
deberta	ensemble	Sentence Sim-topk-uniform	fool	4.4079	88	78_www.wired.com-45_www.npr.org-91_www.entrepreneur.com-70_www.insiderpages.com-10_www.eventbrite.com-77_www.androidheadlines.com-84_www.glassdoor.com-85_www.pcworld.com-60_www.csmonitor.com-58_medium.com	10	0.0-0.1-0.0-0.1-0.0-0.0-0.1-0.0-0.1-0.0-0.1-0.0-0.1-0.1-0.1-0.1-0.0-0.0-0.0-0.0-0.1
deberta	ensemble	tfidf-topk-uniform	fool	4.10861	10	78_www.wired.com-45_www.npr.org-91_www.entrepreneur.com-77_www.androidheadlines.com-60_www.csmonitor.com	5	0.0-0.2-0.0-0.2-0.0-0.0-0.2-0.0-0.0-0.0-0.0-0.0-0.2-0.0-0.0-0.2-0.0-0.0-0.0-0.0-0.0
deberta	ensemble	tfidf-topk-uniform	fool	4.07664	42	78_www.wired.com-45_www.npr.org-91_www.entrepreneur.com-85_www.pcworld.com-60_www.csmonitor.com	5	0.0-0.2-0.0-0.2-0.0-0.0-0.2-0.0-0.0-0.0-0.0-0.0-0.0-0.0-0.2-0.2-0.0-0.0-0.0-0.0-0.0
deberta	ensemble	tfidf-topk-uniform	fool	4.37787	88	78_www.wired.com-91_www.entrepreneur.com-77_www.androidheadlines.com-84_www.glassdoor.com-60_www.csmonitor.com	5	0.0-0.2-0.0-0.0-0.0-0.0-0.2-0.0-0.0-0.0-0.0-0.0-0.2-0.2-0.0-0.2-0.0-0.0-0.0-0.0-0.0
deberta	ensemble	tfidf-topk-uniform	fool	4.28064	5	78_www.wired.com-45_www.npr.org-91_www.entrepreneur.com-22_forums.macrumors.com-77_www.androidheadlines.com-84_www.glassdoor.com-85_www.pcworld.com-60_www.csmonitor.com	10	0.0-0.125-0.0-0.125-0.0-0.0-0.125-0.0-0.0-0.0-0.0-0.125-0.125-0.125-0.125-0.125-0.0-0.0-0.0-0.0-0.0
deberta	ensemble	tfidf-topk-uniform	fool	4.21427	10	15_www.dailymail.co.uk-78_www.wired.com-45_www.npr.org-91_www.entrepreneur.com-22_forums.macrumors.com-77_www.androidheadlines.com-84_www.glassdoor.com-85_www.pcworld.com-60_www.csmonitor.com	10	0.1111111111111111-0.1111111111111111-0.0-0.1111111111111111-0.0-0.0-0.1111111111111111-0.0-0.0-0.0-0.0-0.1111111111111111-0.1111111111111111-0.1111111111111111-0.1111111111111111-0.1111111111111111-0.0-0.0-0.0-0.0-0.0
deberta	ensemble	tfidf-topk-uniform	fool	4.21427	42	15_www.dailymail.co.uk-78_www.wired.com-45_www.npr.org-91_www.entrepreneur.com-22_forums.macrumors.com-77_www.androidheadlines.com-84_www.glassdoor.com-85_www.pcworld.com-60_www.csmonitor.com-58_medium.com	10	0.1-0.1-0.0-0.1-0.0-0.0-0.1-0.0-0.0-0.0-0.0-0.1-0.1-0.1-0.1-0.1-0.0-0.0-0.0-0.0-0.1
deberta	ensemble	tfidf-topk-uniform	fool	4.21839	88	15_www.dailymail.co.uk-78_www.wired.com-45_www.npr.org-91_www.entrepreneur.com-22_forums.macrumors.com-77_www.androidheadlines.com-84_www.glassdoor.com-85_www.pcworld.com-60_www.csmonitor.com-58_medium.com	10	0.1-0.1-0.0-0.1-0.0-0.0-0.1-0.0-0.0-0.0-0.0-0.1-0.1-0.1-0.1-0.1-0.0-0.0-0.0-0.0-0.1
deberta	ensemble	tfidf-topk-uniform	fool	4.289	5	91_www.entrepreneur.com-85_www.pcworld.com	2	0.0-0.0-0.0-0.0-0.0-0.0-0.5-0.0-0.0-0.0-0.0-0.0-0.0-0.0-0.5-0.0-0.0-0.0-0.0-0.0-0.0
deberta	ensemble	Sentence Sim-topk-uniform	fool	4.75678	5	91_www.entrepreneur.com-84_www.glassdoor.com-85_www.pcworld.com	3	0.0-0.0-0.0-0.0-0.0-0.0-0.3333333333333333-0.0-0.0-0.0-0.0-0.0-0.0-0.3333333333333333-0.3333333333333333-0.0-0.0-0.0-0.0-0.0-0.0
deberta	ensemble	Sentence Sim-topk-uniform	fool	4.88387	10	91_www.entrepreneur.com-77_www.androidheadlines.com-84_www.glassdoor.com	3	0.0-0.0-0.0-0.0-0.0-0.0-0.3333333333333333-0.0-0.0-0.0-0.0-0.0-0.3333333333333333-0.3333333333333333-0.0-0.0-0.0-0.0-0.0-0.0-0.0
deberta	ensemble	Sentence Sim-topk-uniform	fool	4.73361	42	91_www.entrepreneur.com-84_www.glassdoor.com-85_www.pcworld.com	3	0.0-0.0-0.0-0.0-0.0-0.0-0.3333333333333333-0.0-0.0-0.0-0.0-0.0-0.0-0.3333333333333333-0.3333333333333333-0.0-0.0-0.0-0.0-0.0-0.0
deberta	ensemble	Sentence Sim-topk-uniform	fool	4.87434	88	91_www.entrepreneur.com-77_www.androidheadlines.com-84_www.glassdoor.com	3	0.0-0.0-0.0-0.0-0.0-0.0-0.3333333333333333-0.0-0.0-0.0-0.0-0.0-0.3333333333333333-0.3333333333333333-0.0-0.0-0.0-0.0-0.0-0.0-0.0
deberta	ensemble	Sentence Sim-topk-uniform	fool	4.66933	5	91_www.entrepreneur.com-77_www.androidheadlines.com-84_www.glassdoor.com-85_www.pcworld.com	4	0.0-0.0-0.0-0.0-0.0-0.0-0.25-0.0-0.0-0.0-0.0-0.0-0.25-0.25-0.25-0.0-0.0-0.0-0.0-0.0-0.0
deberta	ensemble	Sentence Sim-topk-uniform	fool	4.66022	10	91_www.entrepreneur.com-77_www.androidheadlines.com-84_www.glassdoor.com-85_www.pcworld.com	4	0.0-0.0-0.0-0.0-0.0-0.0-0.25-0.0-0.0-0.0-0.0-0.0-0.25-0.25-0.25-0.0-0.0-0.0-0.0-0.0-0.0
deberta	ensemble	Sentence Sim-topk-uniform	fool	4.64205	42	91_www.entrepreneur.com-77_www.androidheadlines.com-84_www.glassdoor.com-85_www.pcworld.com	4	0.0-0.0-0.0-0.0-0.0-0.0-0.25-0.0-0.0-0.0-0.0-0.0-0.25-0.25-0.25-0.0-0.0-0.0-0.0-0.0-0.0
deberta	ensemble	Sentence Sim-topk-uniform	fool	4.64659	88	91_www.entrepreneur.com-77_www.androidheadlines.com-84_www.glassdoor.com-85_www.pcworld.com	4	0.0-0.0-0.0-0.0-0.0-0.0-0.25-0.0-0.0-0.0-0.0-0.0-0.25-0.25-0.25-0.0-0.0-0.0-0.0-0.0-0.0
deberta	ensemble	Entropy-topk-uniform	fool	4.06075	42	15_www.dailymail.co.uk-78_www.wired.com-45_www.npr.org-91_www.entrepreneur.com-11_link.springer.com-22_forums.macrumors.com-85_www.pcworld.com-60_www.csmonitor.com-journals.plos.org-www.frontiersin.org	10	0.1-0.1-0.0-0.1-0.0-0.0-0.1-0.1-0.0-0.0-0.0-0.1-0.0-0.0-0.1-0.1-0.0-0.0-0.1-0.1-0.0
gpt2	average	Sentence Sim-topk-uniform	fool	21.2274	5	91_www.entrepreneur.com-84_www.glassdoor.com-85_www.pcworld.com	3	0.0-0.0-0.0-0.0-0.0-0.0-0.3333333333333333-0.0-0.0-0.0-0.0-0.0-0.0-0.3333333333333333-0.3333333333333333-0.0-0.0-0.0-0.0-0.0-0.0
gpt2	ensemble	Sentence Sim-topk-uniform	fool	21.2146	5	91_www.entrepreneur.com-84_www.glassdoor.com-85_www.pcworld.com	3	0.0-0.0-0.0-0.0-0.0-0.0-0.3333333333333333-0.0-0.0-0.0-0.0-0.0-0.0-0.3333333333333333-0.3333333333333333-0.0-0.0-0.0-0.0-0.0-0.0
gpt2	average	Sentence Sim-topk-uniform	fool	21.3704	10	91_www.entrepreneur.com-77_www.androidheadlines.com-84_www.glassdoor.com	3	0.0-0.0-0.0-0.0-0.0-0.0-0.3333333333333333-0.0-0.0-0.0-0.0-0.0-0.3333333333333333-0.3333333333333333-0.0-0.0-0.0-0.0-0.0-0.0-0.0
gpt2	ensemble	Sentence Sim-topk-uniform	fool	21.3392	10	91_www.entrepreneur.com-77_www.androidheadlines.com-84_www.glassdoor.com	3	0.0-0.0-0.0-0.0-0.0-0.0-0.3333333333333333-0.0-0.0-0.0-0.0-0.0-0.3333333333333333-0.3333333333333333-0.0-0.0-0.0-0.0-0.0-0.0-0.0
gpt2	average	Sentence Sim-topk-uniform	fool	21.2274	42	91_www.entrepreneur.com-84_www.glassdoor.com-85_www.pcworld.com	3	0.0-0.0-0.0-0.0-0.0-0.0-0.3333333333333333-0.0-0.0-0.0-0.0-0.0-0.0-0.3333333333333333-0.3333333333333333-0.0-0.0-0.0-0.0-0.0-0.0
gpt2	ensemble	Sentence Sim-topk-uniform	fool	21.2146	42	91_www.entrepreneur.com-84_www.glassdoor.com-85_www.pcworld.com	3	0.0-0.0-0.0-0.0-0.0-0.0-0.3333333333333333-0.0-0.0-0.0-0.0-0.0-0.0-0.3333333333333333-0.3333333333333333-0.0-0.0-0.0-0.0-0.0-0.0
gpt2	average	Sentence Sim-topk-uniform	fool	21.3704	88	91_www.entrepreneur.com-77_www.androidheadlines.com-84_www.glassdoor.com	3	0.0-0.0-0.0-0.0-0.0-0.0-0.3333333333333333-0.0-0.0-0.0-0.0-0.0-0.3333333333333333-0.3333333333333333-0.0-0.0-0.0-0.0-0.0-0.0-0.0
gpt2	ensemble	Sentence Sim-topk-uniform	fool	21.3392	88	91_www.entrepreneur.com-77_www.androidheadlines.com-84_www.glassdoor.com	3	0.0-0.0-0.0-0.0-0.0-0.0-0.3333333333333333-0.0-0.0-0.0-0.0-0.0-0.3333333333333333-0.3333333333333333-0.0-0.0-0.0-0.0-0.0-0.0-0.0
gpt2	average	Sentence Sim-topk-uniform	fool	21.2206	5	91_www.entrepreneur.com-77_www.androidheadlines.com-84_www.glassdoor.com-85_www.pcworld.com	4	0.0-0.0-0.0-0.0-0.0-0.0-0.25-0.0-0.0-0.0-0.0-0.0-0.25-0.25-0.25-0.0-0.0-0.0-0.0-0.0-0.0
gpt2	ensemble	Sentence Sim-topk-uniform	fool	21.1732	5	91_www.entrepreneur.com-77_www.androidheadlines.com-84_www.glassdoor.com-85_www.pcworld.com	4	0.0-0.0-0.0-0.0-0.0-0.0-0.25-0.0-0.0-0.0-0.0-0.0-0.25-0.25-0.25-0.0-0.0-0.0-0.0-0.0-0.0
gpt2	average	Sentence Sim-topk-uniform	fool	21.2206	10	91_www.entrepreneur.com-77_www.androidheadlines.com-84_www.glassdoor.com-85_www.pcworld.com	4	0.0-0.0-0.0-0.0-0.0-0.0-0.25-0.0-0.0-0.0-0.0-0.0-0.25-0.25-0.25-0.0-0.0-0.0-0.0-0.0-0.0
gpt2	ensemble	Sentence Sim-topk-uniform	fool	21.1732	10	91_www.entrepreneur.com-77_www.androidheadlines.com-84_www.glassdoor.com-85_www.pcworld.com	4	0.0-0.0-0.0-0.0-0.0-0.0-0.25-0.0-0.0-0.0-0.0-0.0-0.25-0.25-0.25-0.0-0.0-0.0-0.0-0.0-0.0
gpt2	average	Sentence Sim-topk-uniform	fool	21.2206	42	91_www.entrepreneur.com-77_www.androidheadlines.com-84_www.glassdoor.com-85_www.pcworld.com	4	0.0-0.0-0.0-0.0-0.0-0.0-0.25-0.0-0.0-0.0-0.0-0.0-0.25-0.25-0.25-0.0-0.0-0.0-0.0-0.0-0.0
gpt2	ensemble	Sentence Sim-topk-uniform	fool	21.1732	42	91_www.entrepreneur.com-77_www.androidheadlines.com-84_www.glassdoor.com-85_www.pcworld.com	4	0.0-0.0-0.0-0.0-0.0-0.0-0.25-0.0-0.0-0.0-0.0-0.0-0.25-0.25-0.25-0.0-0.0-0.0-0.0-0.0-0.0
gpt2	average	Sentence Sim-topk-uniform	fool	21.2206	88	91_www.entrepreneur.com-77_www.androidheadlines.com-84_www.glassdoor.com-85_www.pcworld.com	4	0.0-0.0-0.0-0.0-0.0-0.0-0.25-0.0-0.0-0.0-0.0-0.0-0.25-0.25-0.25-0.0-0.0-0.0-0.0-0.0-0.0
gpt2	ensemble	Sentence Sim-topk-uniform	fool	21.1732	88	91_www.entrepreneur.com-77_www.androidheadlines.com-84_www.glassdoor.com-85_www.pcworld.com	4	0.0-0.0-0.0-0.0-0.0-0.0-0.25-0.0-0.0-0.0-0.0-0.0-0.25-0.25-0.25-0.0-0.0-0.0-0.0-0.0-0.0
gpt2	average	tfidf-topk-uniform	fool	21.1824	5	91_www.entrepreneur.com-85_www.pcworld.com	2	0.0-0.0-0.0-0.0-0.0-0.0-0.5-0.0-0.0-0.0-0.0-0.0-0.0-0.0-0.5-0.0-0.0-0.0-0.0-0.0-0.0
gpt2	ensemble	tfidf-topk-uniform	fool	21.2146	5	91_www.entrepreneur.com-85_www.pcworld.com	2	0.0-0.0-0.0-0.0-0.0-0.0-0.5-0.0-0.0-0.0-0.0-0.0-0.0-0.0-0.5-0.0-0.0-0.0-0.0-0.0-0.0
gpt2	average	tfidf-topk-uniform	fool	21.3496	10	78_www.wired.com-60_www.csmonitor.com	2	0.0-0.5-0.0-0.0-0.0-0.0-0.0-0.0-0.0-0.0-0.0-0.0-0.0-0.0-0.0-0.5-0.0-0.0-0.0-0.0-0.0
gpt2	ensemble	tfidf-topk-uniform	fool	21.3809	10	78_www.wired.com-60_www.csmonitor.com	2	0.0-0.5-0.0-0.0-0.0-0.0-0.0-0.0-0.0-0.0-0.0-0.0-0.0-0.0-0.0-0.5-0.0-0.0-0.0-0.0-0.0
gpt2	average	tfidf-topk-uniform	fool	21.1938	42	78_www.wired.com-91_www.entrepreneur.com	2	0.0-0.5-0.0-0.0-0.0-0.0-0.5-0.0-0.0-0.0-0.0-0.0-0.0-0.0-0.0-0.0-0.0-0.0-0.0-0.0-0.0
gpt2	ensemble	tfidf-topk-uniform	fool	21.2146	42	78_www.wired.com-91_www.entrepreneur.com	2	0.0-0.5-0.0-0.0-0.0-0.0-0.5-0.0-0.0-0.0-0.0-0.0-0.0-0.0-0.0-0.0-0.0-0.0-0.0-0.0-0.0
gpt2	average	tfidf-topk-uniform	fool	21.2678	88	91_www.entrepreneur.com-60_www.csmonitor.com	2	0.0-0.0-0.0-0.0-0.0-0.0-0.5-0.0-0.0-0.0-0.0-0.0-0.0-0.0-0.0-0.5-0.0-0.0-0.0-0.0-0.0
gpt2	ensemble	tfidf-topk-uniform	fool	21.2976	88	91_www.entrepreneur.com-60_www.csmonitor.com	2	0.0-0.0-0.0-0.0-0.0-0.0-0.5-0.0-0.0-0.0-0.0-0.0-0.0-0.0-0.0-0.5-0.0-0.0-0.0-0.0-0.0
gpt2	average	tfidf-topk-uniform	fool	21.1651	5	78_www.wired.com-91_www.entrepreneur.com-85_www.pcworld.com	3	0.0-0.3333333333333333-0.0-0.0-0.0-0.0-0.3333333333333333-0.0-0.0-0.0-0.0-0.0-0.0-0.0-0.3333333333333333-0.0-0.0-0.0-0.0-0.0-0.0
gpt2	ensemble	tfidf-topk-uniform	fool	21.1732	5	78_www.wired.com-91_www.entrepreneur.com-85_www.pcworld.com	3	0.0-0.3333333333333333-0.0-0.0-0.0-0.0-0.3333333333333333-0.0-0.0-0.0-0.0-0.0-0.0-0.0-0.3333333333333333-0.0-0.0-0.0-0.0-0.0-0.0
gpt2	average	tfidf-topk-uniform	fool	21.2016	10	78_www.wired.com-91_www.entrepreneur.com-60_www.csmonitor.com	3	0.0-0.3333333333333333-0.0-0.0-0.0-0.0-0.3333333333333333-0.0-0.0-0.0-0.0-0.0-0.0-0.0-0.0-0.3333333333333333-0.0-0.0-0.0-0.0-0.0
gpt2	ensemble	tfidf-topk-uniform	fool	21.2146	10	78_www.wired.com-91_www.entrepreneur.com-60_www.csmonitor.com	3	0.0-0.3333333333333333-0.0-0.0-0.0-0.0-0.3333333333333333-0.0-0.0-0.0-0.0-0.0-0.0-0.0-0.0-0.3333333333333333-0.0-0.0-0.0-0.0-0.0
gpt2	average	tfidf-topk-uniform	fool	21.1651	42	78_www.wired.com-91_www.entrepreneur.com-85_www.pcworld.com	3	0.0-0.3333333333333333-0.0-0.0-0.0-0.0-0.3333333333333333-0.0-0.0-0.0-0.0-0.0-0.0-0.0-0.3333333333333333-0.0-0.0-0.0-0.0-0.0-0.0
gpt2	ensemble	tfidf-topk-uniform	fool	21.1732	42	78_www.wired.com-91_www.entrepreneur.com-85_www.pcworld.com	3	0.0-0.3333333333333333-0.0-0.0-0.0-0.0-0.3333333333333333-0.0-0.0-0.0-0.0-0.0-0.0-0.0-0.3333333333333333-0.0-0.0-0.0-0.0-0.0-0.0
gpt2	average	tfidf-topk-uniform	fool	21.2016	88	78_www.wired.com-91_www.entrepreneur.com-60_www.csmonitor.com	3	0.0-0.3333333333333333-0.0-0.0-0.0-0.0-0.3333333333333333-0.0-0.0-0.0-0.0-0.0-0.0-0.0-0.0-0.3333333333333333-0.0-0.0-0.0-0.0-0.0
gpt2	ensemble	tfidf-topk-uniform	fool	21.2146	88	78_www.wired.com-91_www.entrepreneur.com-60_www.csmonitor.com	3	0.0-0.3333333333333333-0.0-0.0-0.0-0.0-0.3333333333333333-0.0-0.0-0.0-0.0-0.0-0.0-0.0-0.0-0.3333333333333333-0.0-0.0-0.0-0.0-0.0
gpt2	average	tfidf-topk-uniform	fool	21.1605	5	78_www.wired.com-91_www.entrepreneur.com-85_www.pcworld.com-60_www.csmonitor.com	4	0.0-0.25-0.0-0.0-0.0-0.0-0.25-0.0-0.0-0.0-0.0-0.0-0.0-0.0-0.25-0.25-0.0-0.0-0.0-0.0-0.0
gpt2	ensemble	tfidf-topk-uniform	fool	21.1732	5	78_www.wired.com-91_www.entrepreneur.com-85_www.pcworld.com-60_www.csmonitor.com	4	0.0-0.25-0.0-0.0-0.0-0.0-0.25-0.0-0.0-0.0-0.0-0.0-0.0-0.0-0.25-0.25-0.0-0.0-0.0-0.0-0.0
gpt2	average	tfidf-topk-uniform	fool	21.1273	10	78_www.wired.com-91_www.entrepreneur.com-77_www.androidheadlines.com-60_www.csmonitor.com	4	0.0-0.25-0.0-0.0-0.0-0.0-0.25-0.0-0.0-0.0-0.0-0.0-0.25-0.0-0.0-0.25-0.0-0.0-0.0-0.0-0.0
gpt2	ensemble	tfidf-topk-uniform	fool	21.1318	10	78_www.wired.com-91_www.entrepreneur.com-77_www.androidheadlines.com-60_www.csmonitor.com	4	0.0-0.25-0.0-0.0-0.0-0.0-0.25-0.0-0.0-0.0-0.0-0.0-0.25-0.0-0.0-0.25-0.0-0.0-0.0-0.0-0.0
gpt2	average	tfidf-topk-uniform	fool	21.1605	42	78_www.wired.com-91_www.entrepreneur.com-85_www.pcworld.com-60_www.csmonitor.com	4	0.0-0.25-0.0-0.0-0.0-0.0-0.25-0.0-0.0-0.0-0.0-0.0-0.0-0.0-0.25-0.25-0.0-0.0-0.0-0.0-0.0
[truncated: 11,033 more rows]
